# Supplementary material for: A transmission-virulence evolutionary trade-off explains attenuation of HIV-1 in Uganda
Source: eLife journal article supplement (doi:10.7554/elife.20492), 2016-11-05

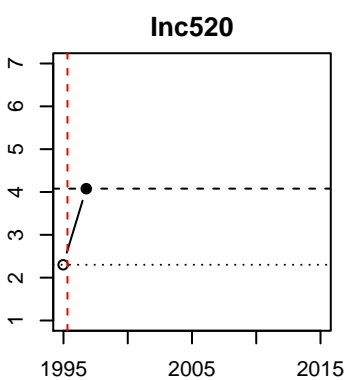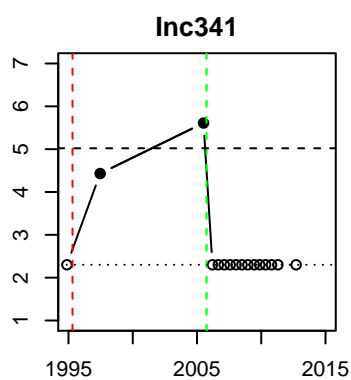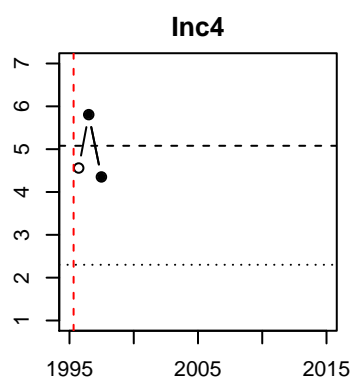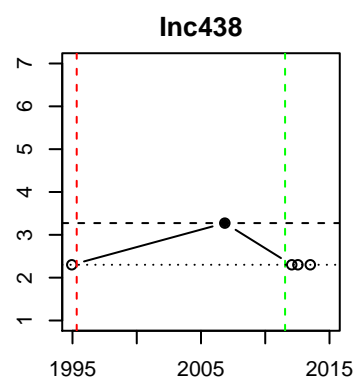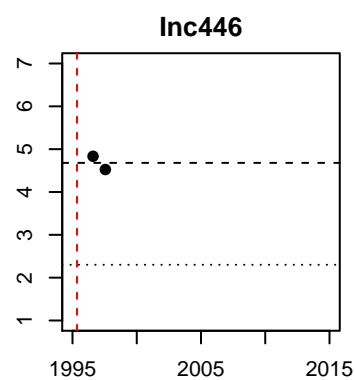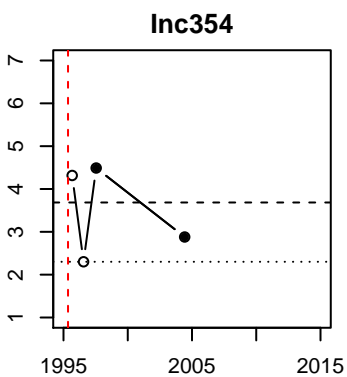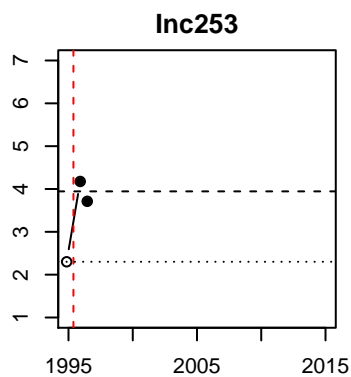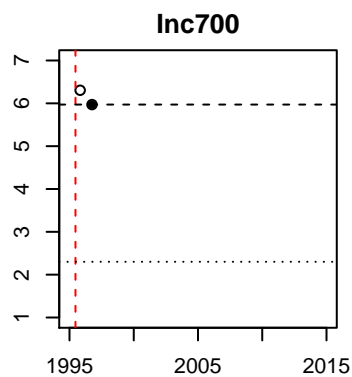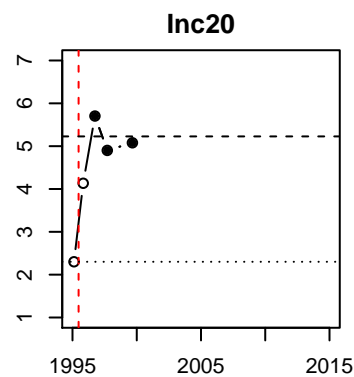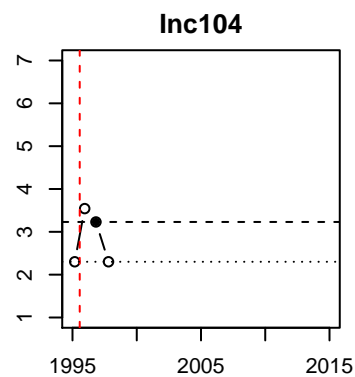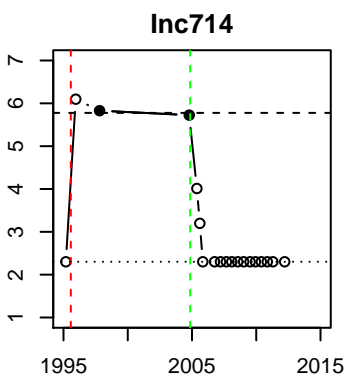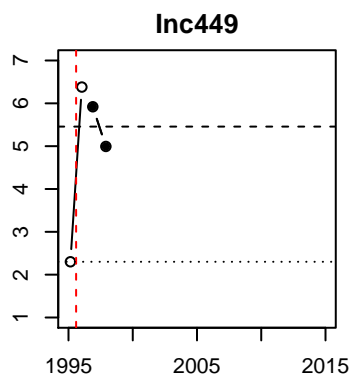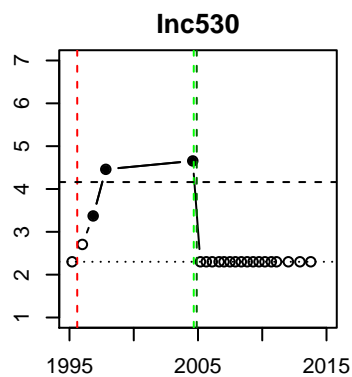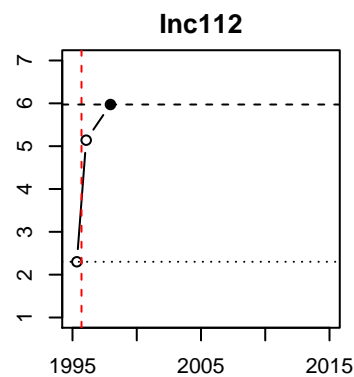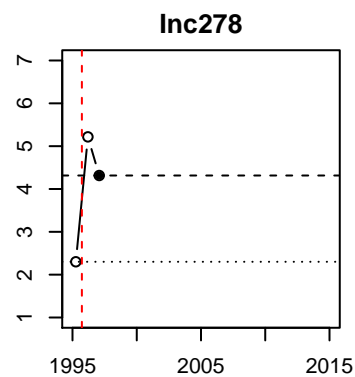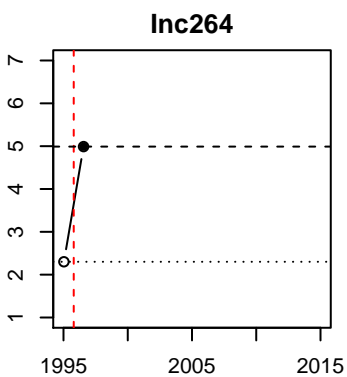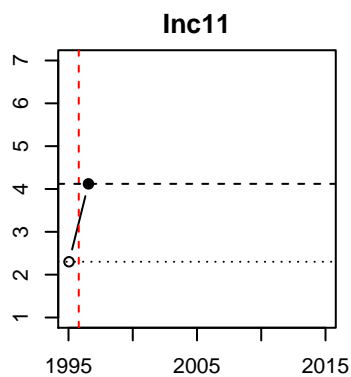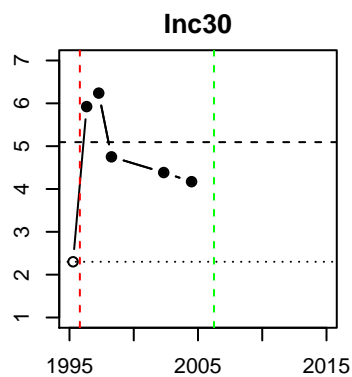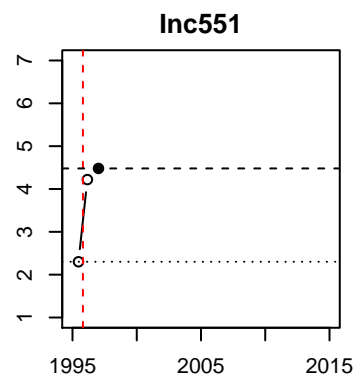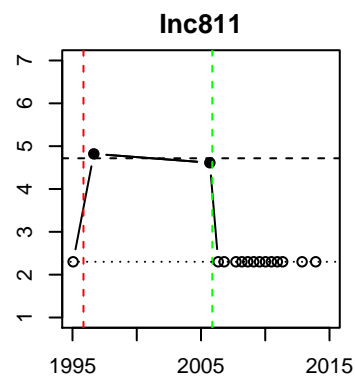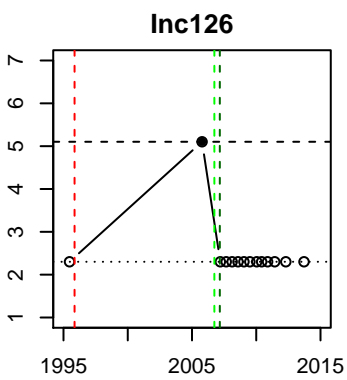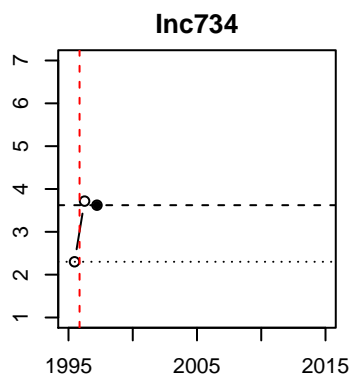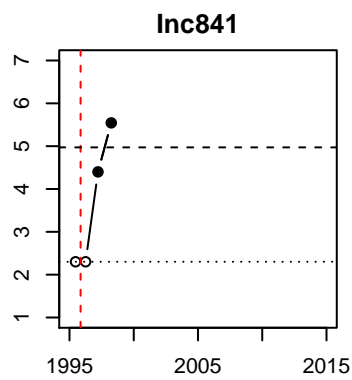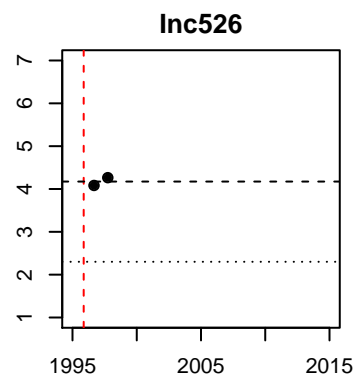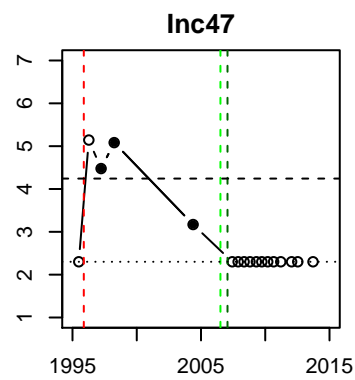

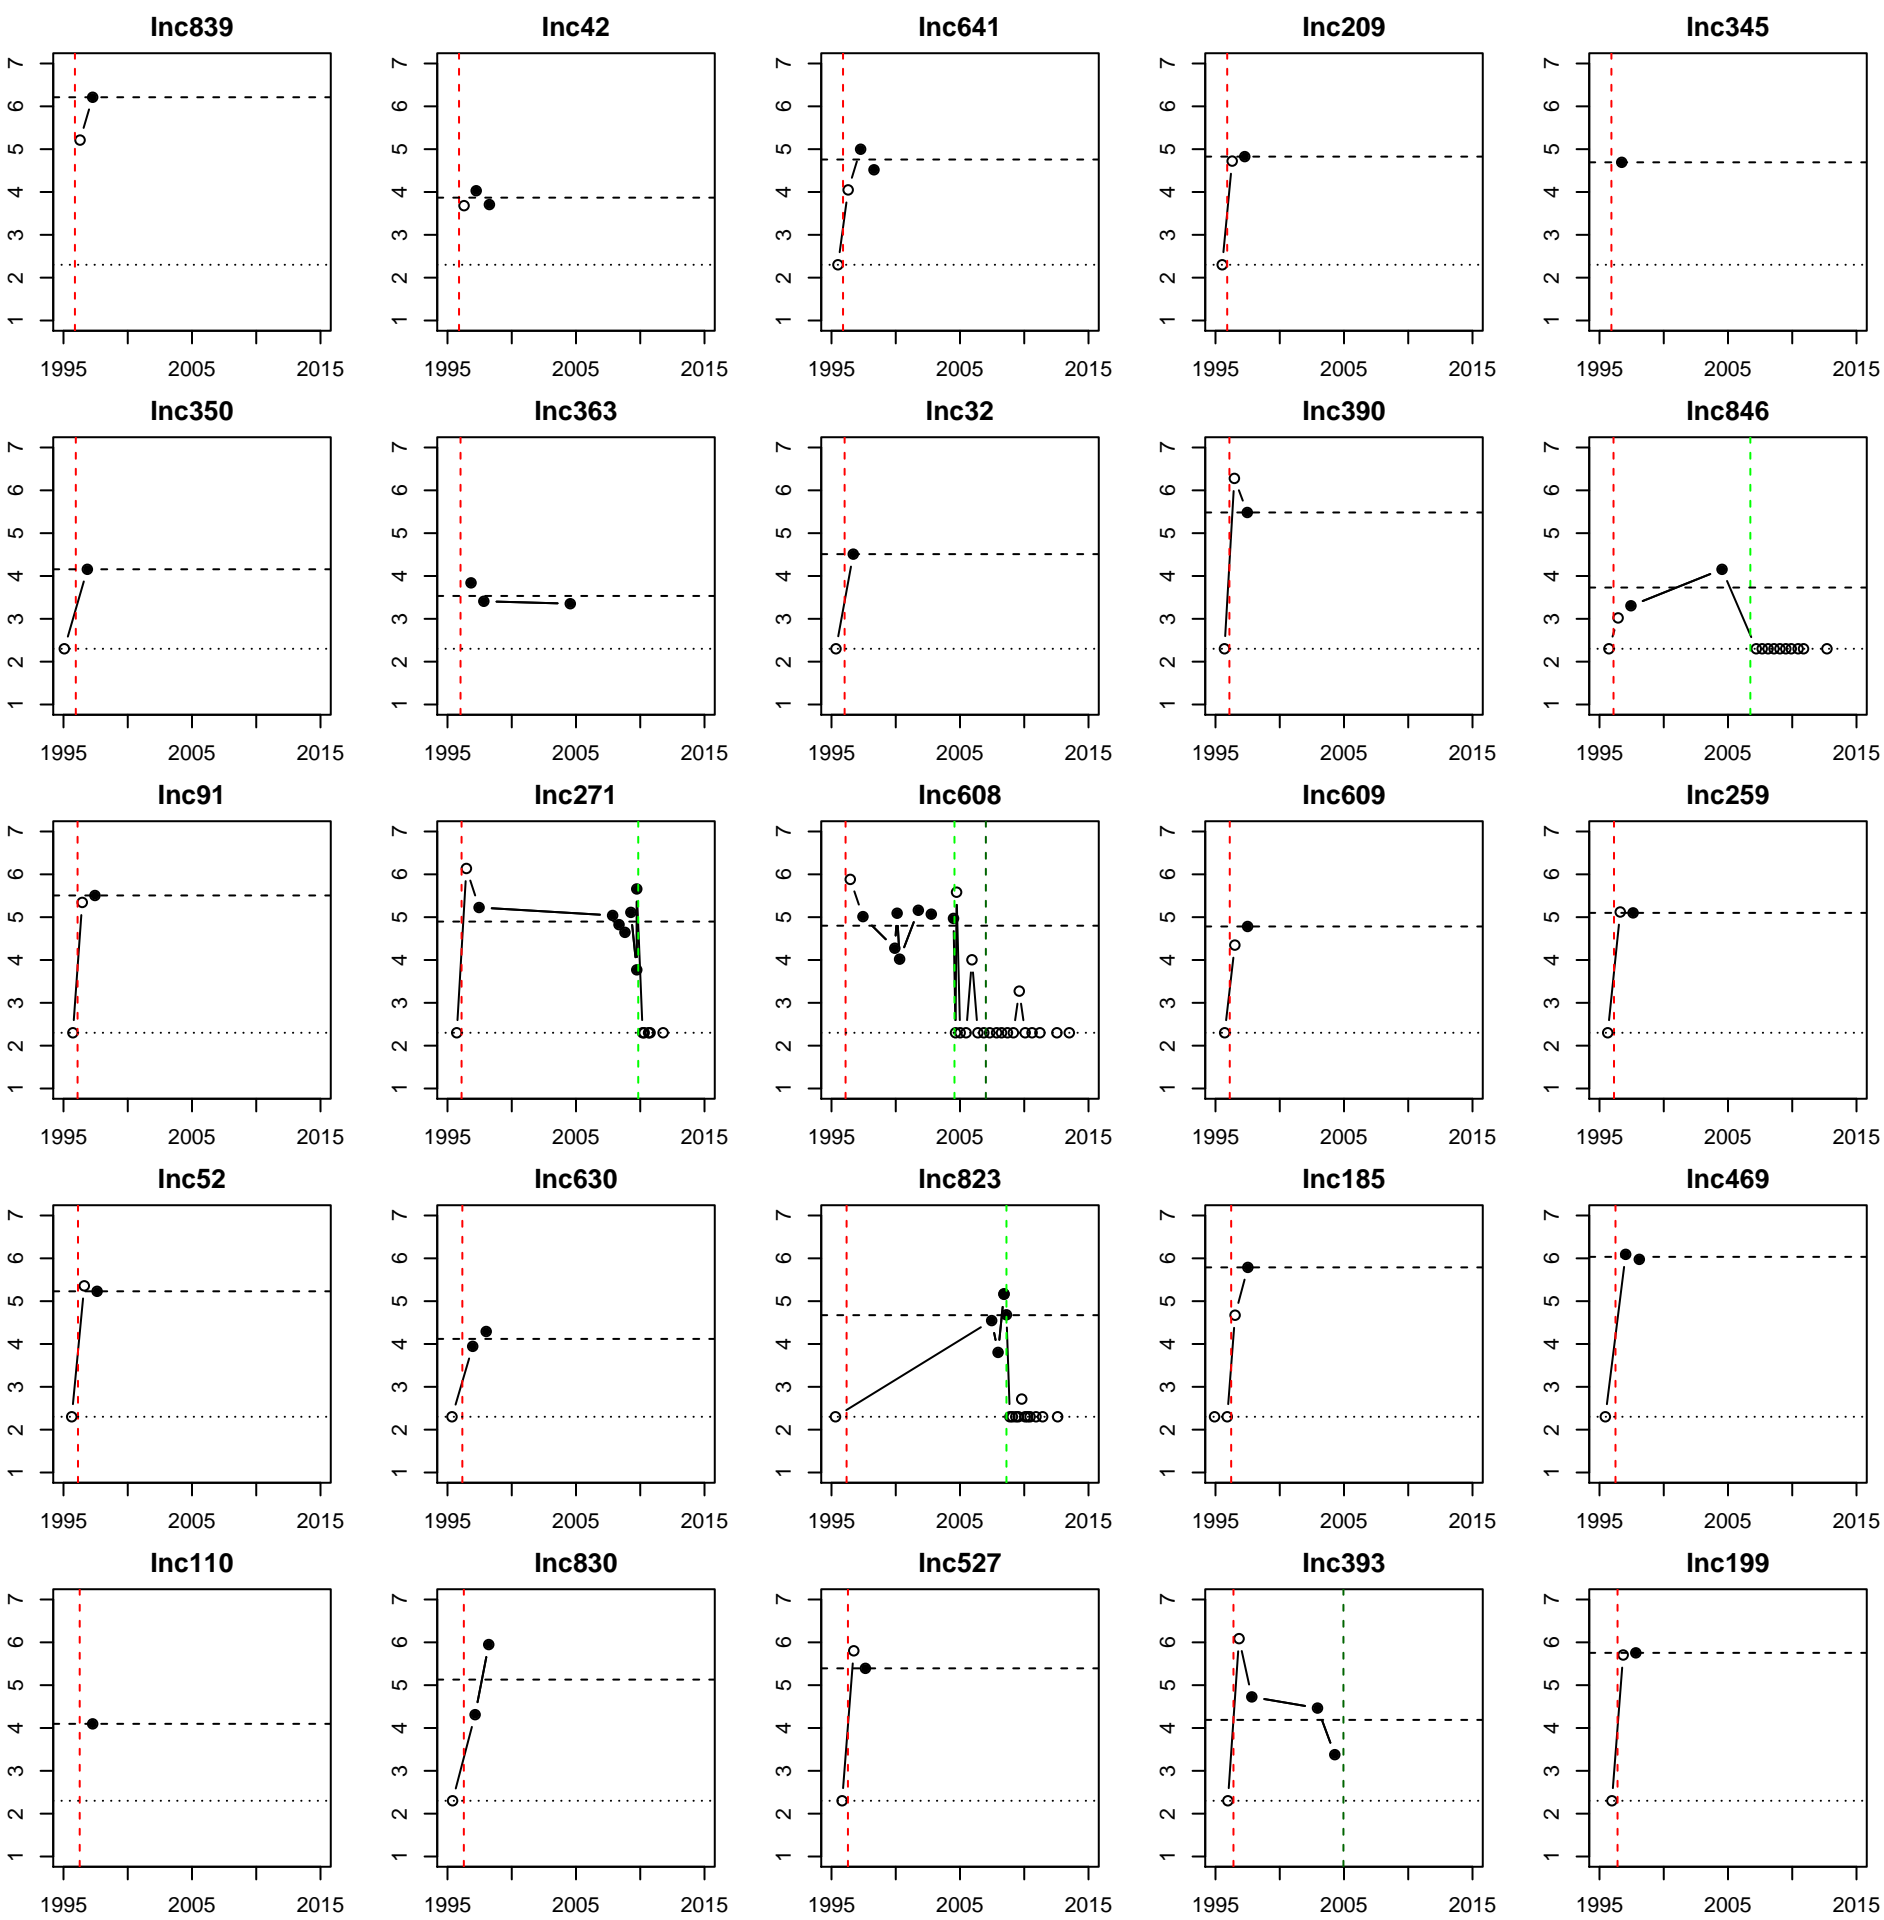

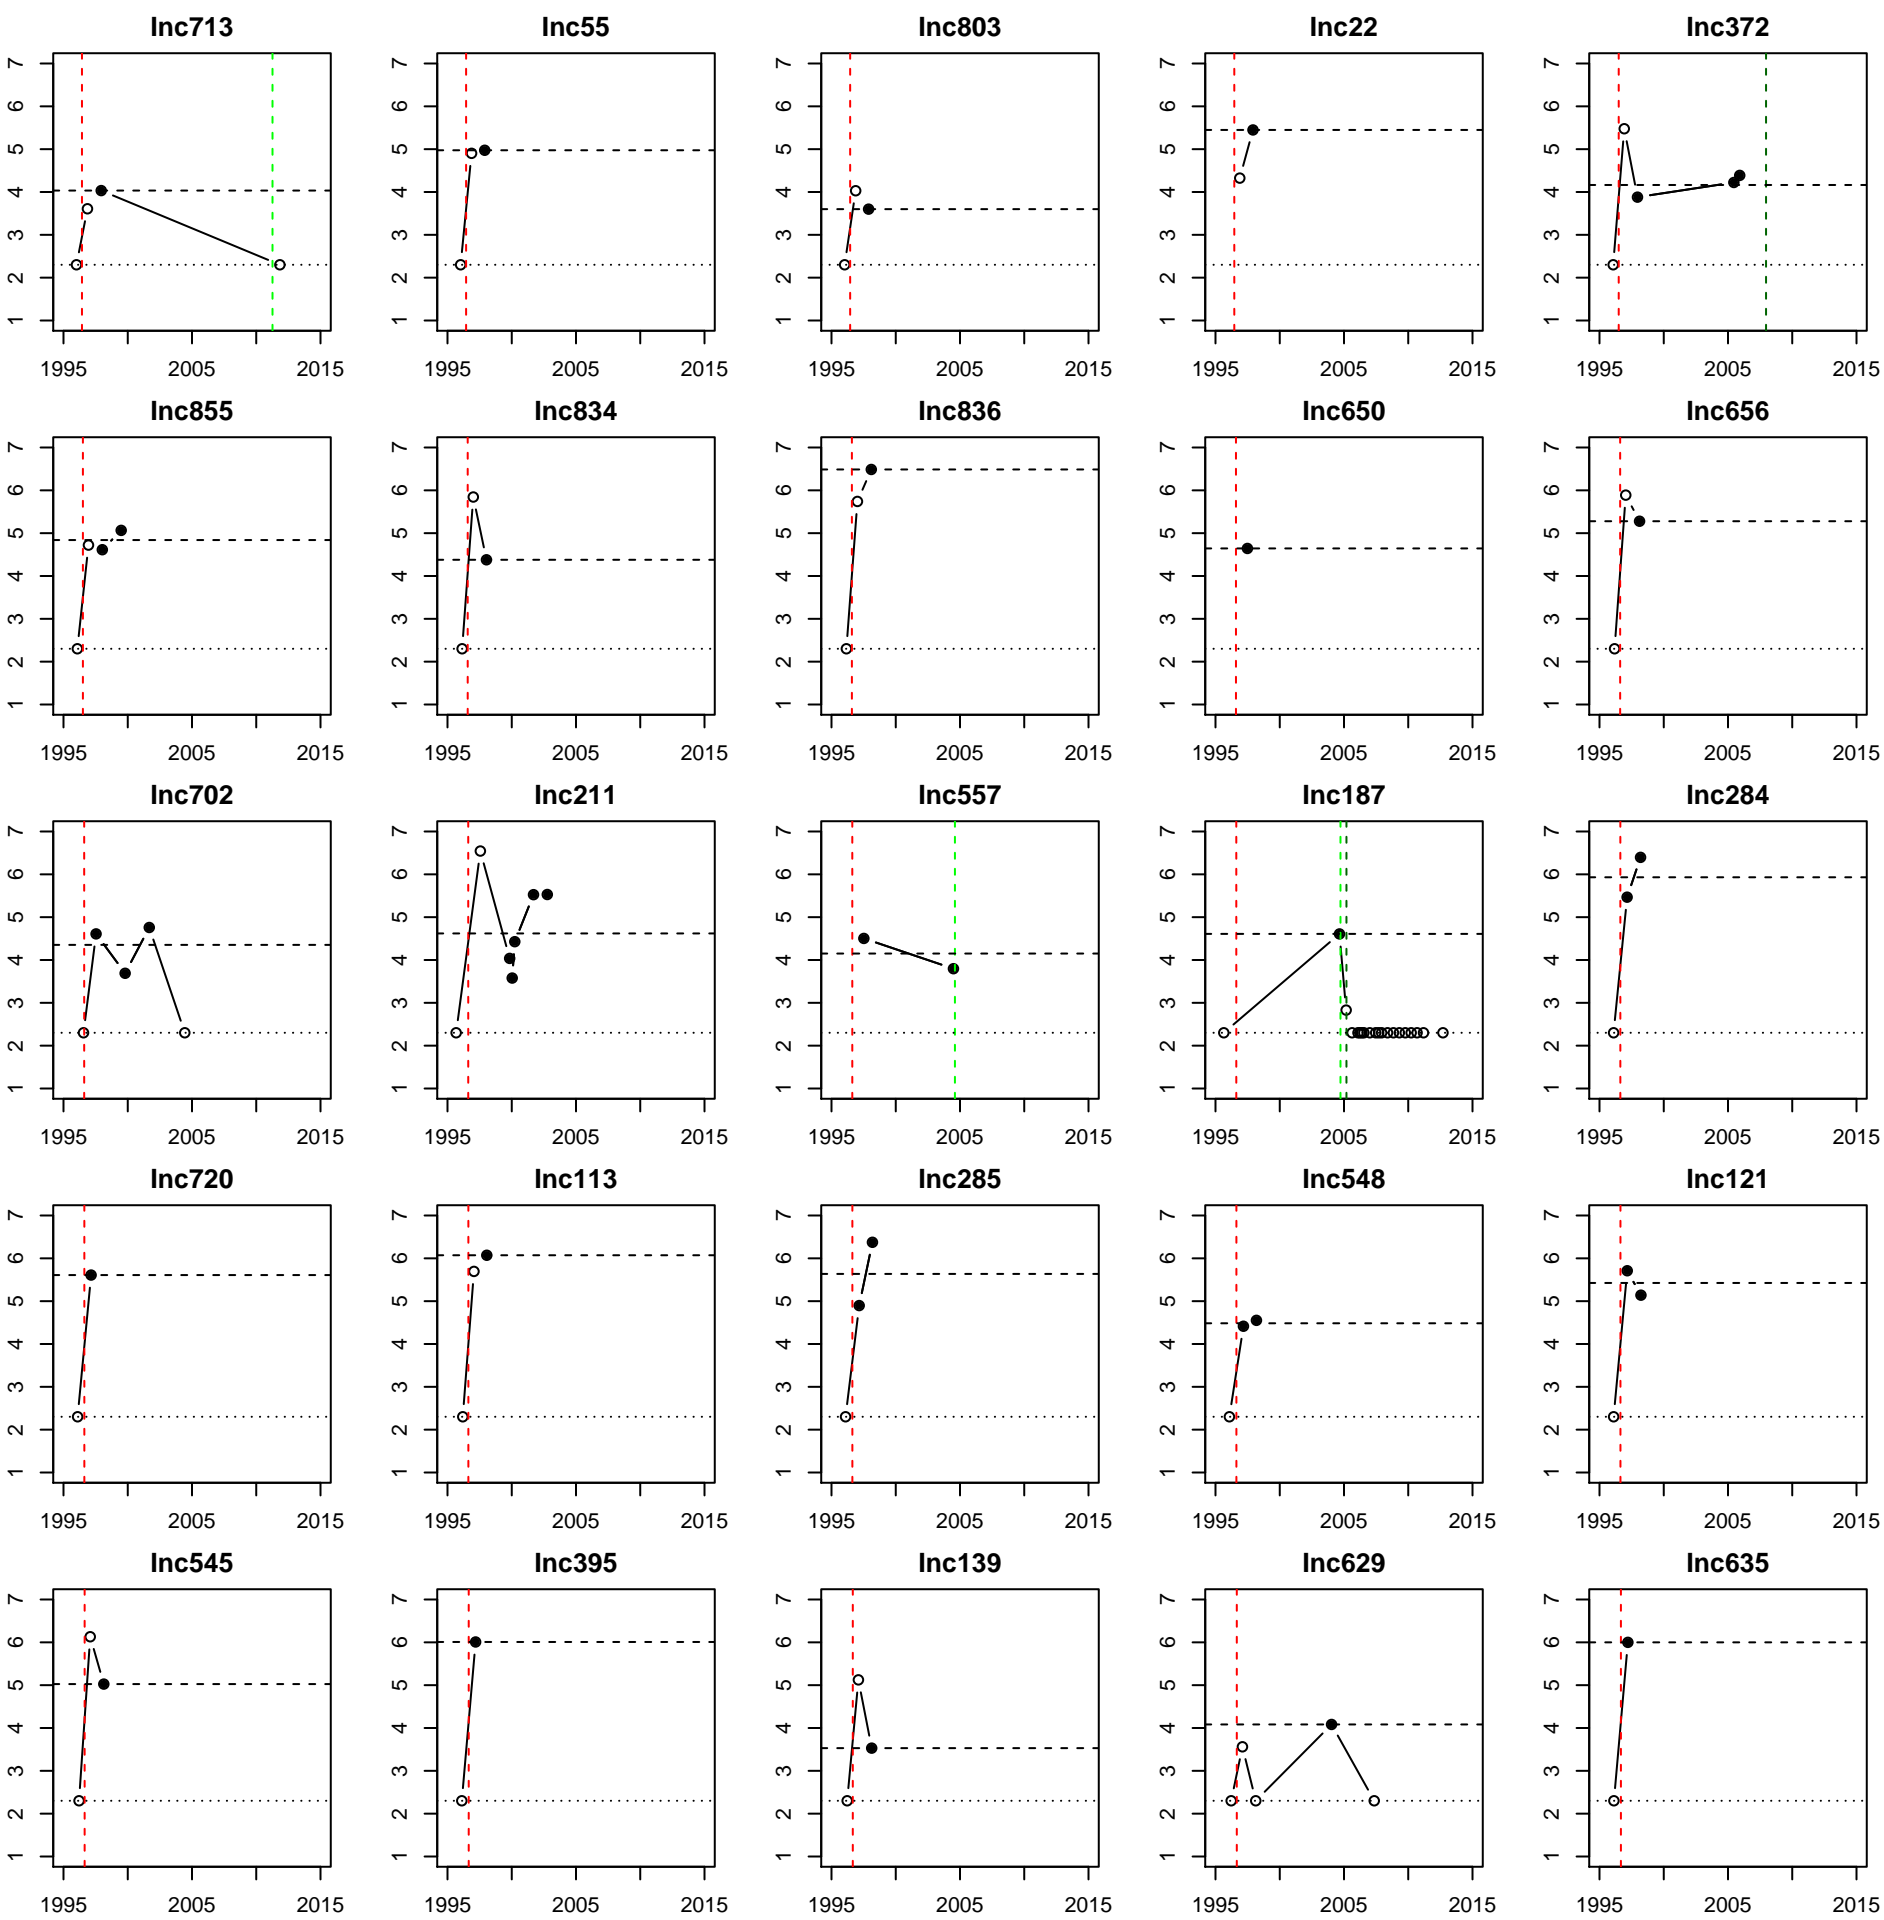

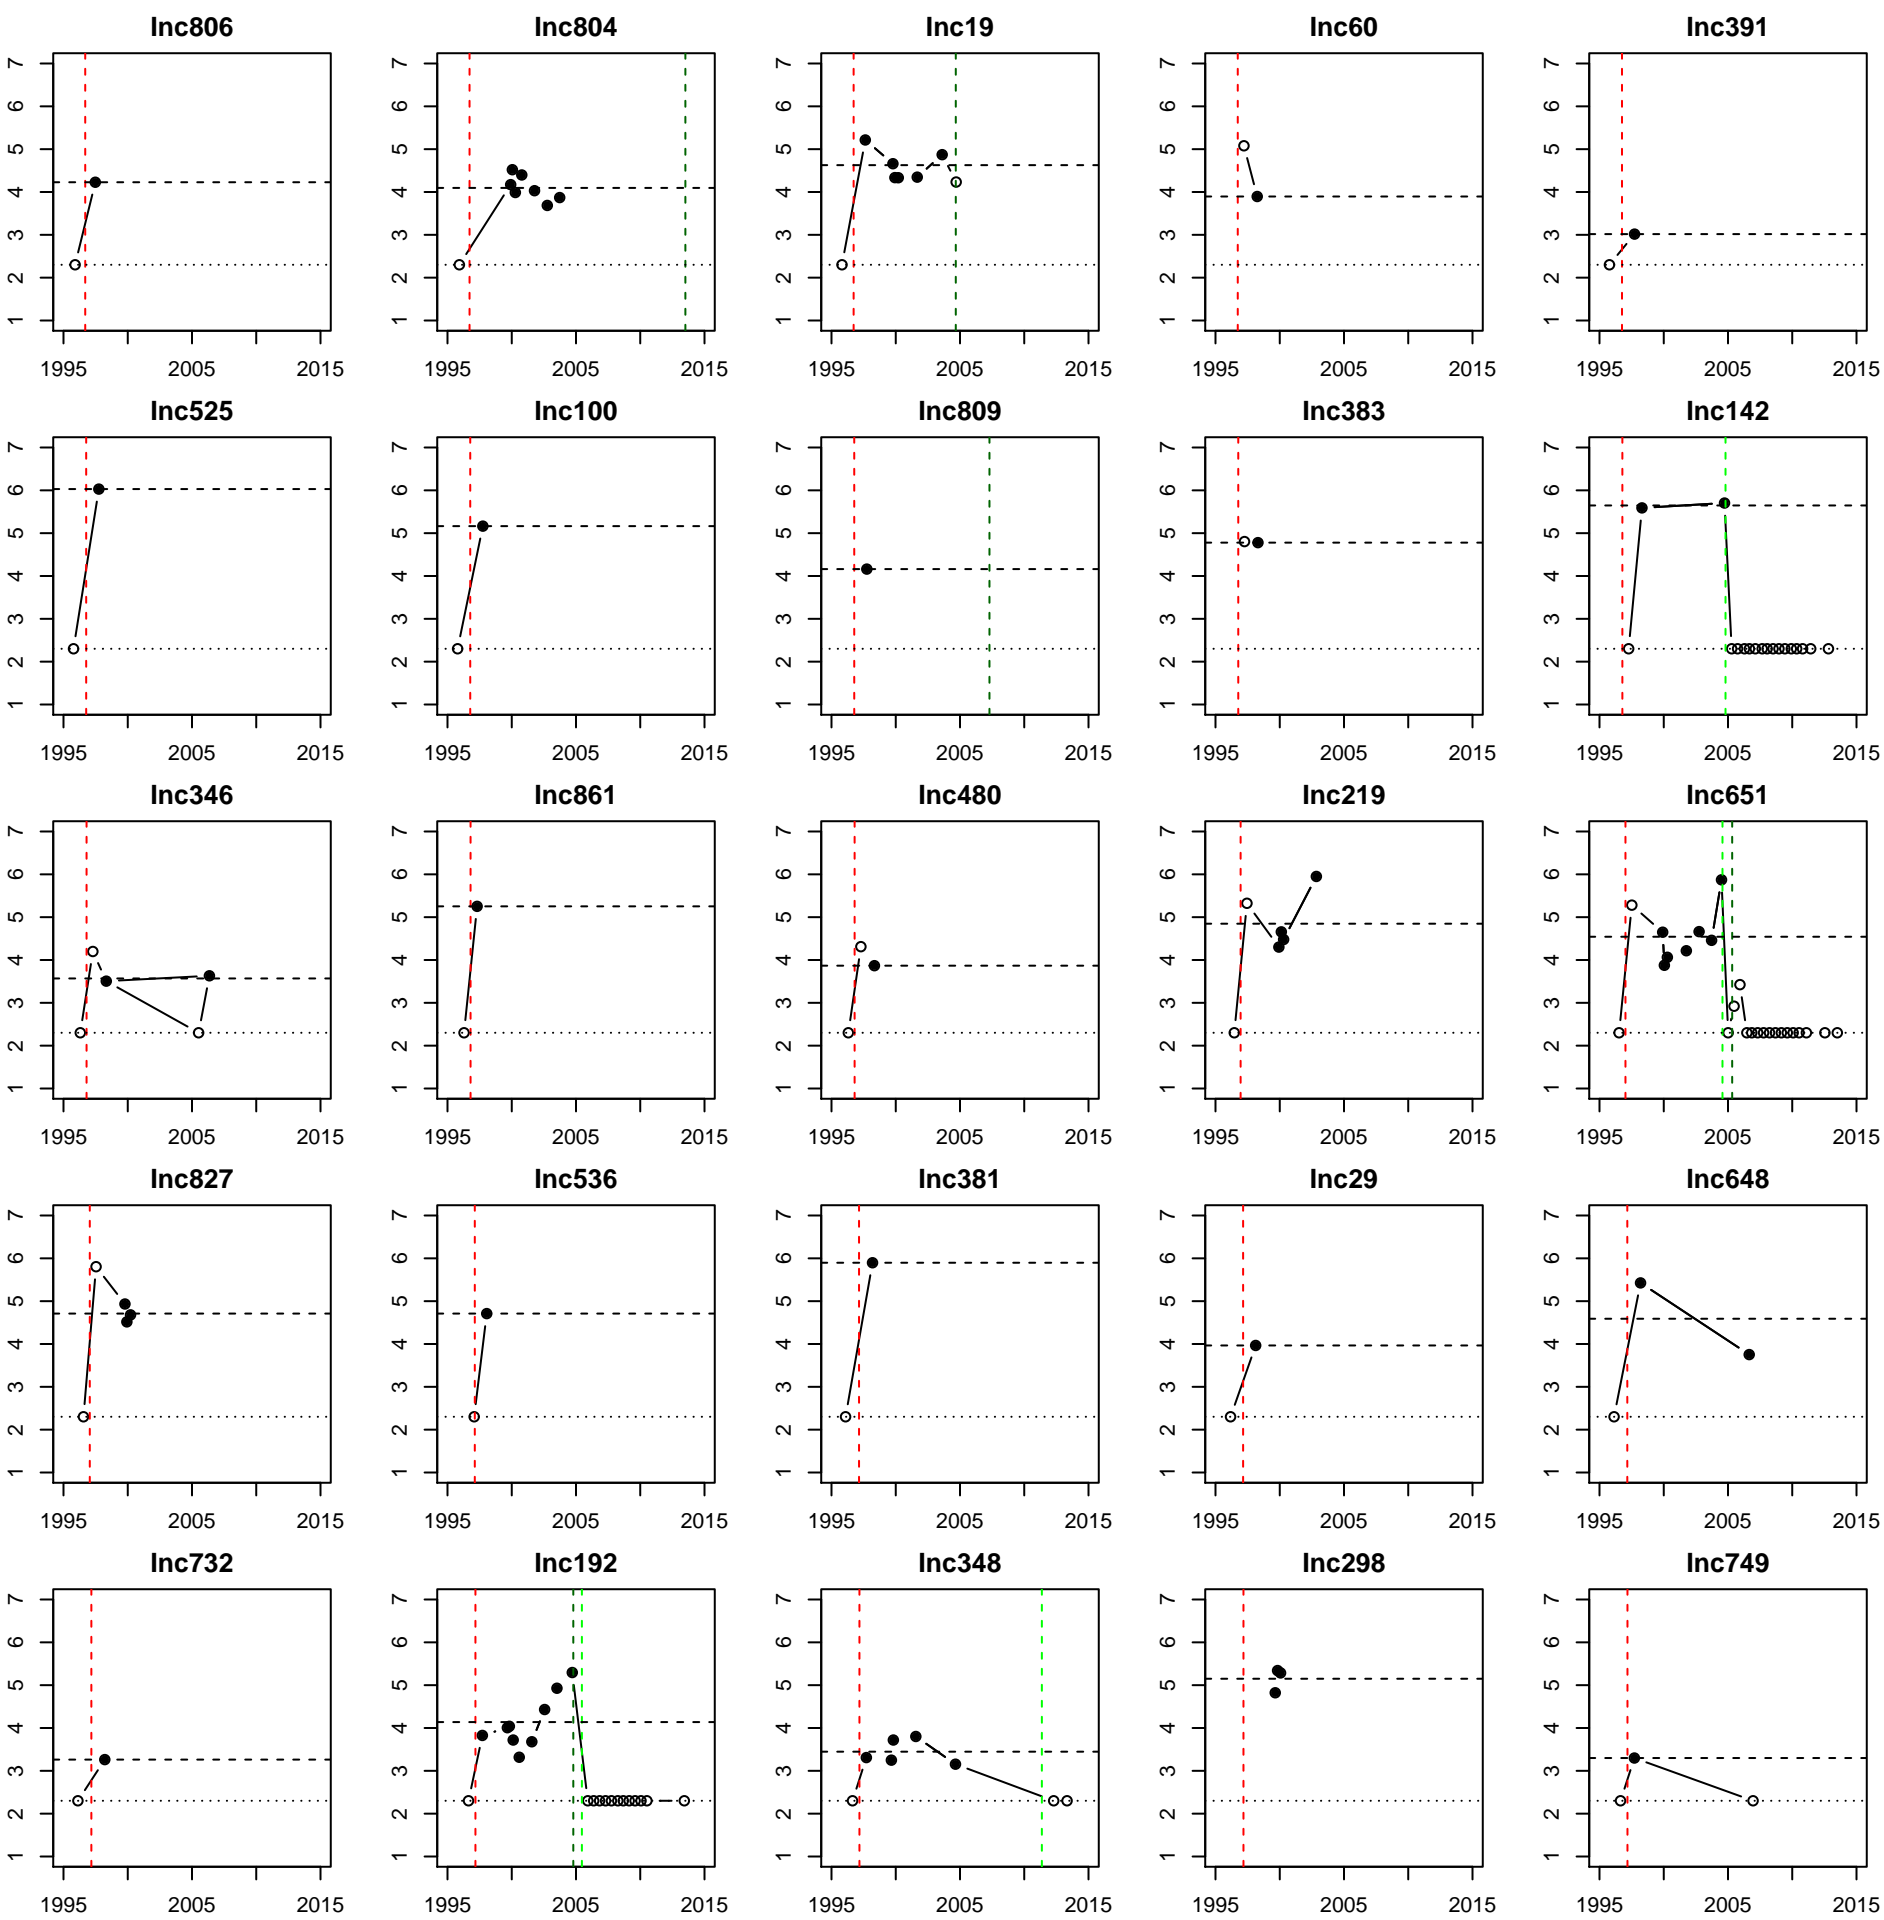

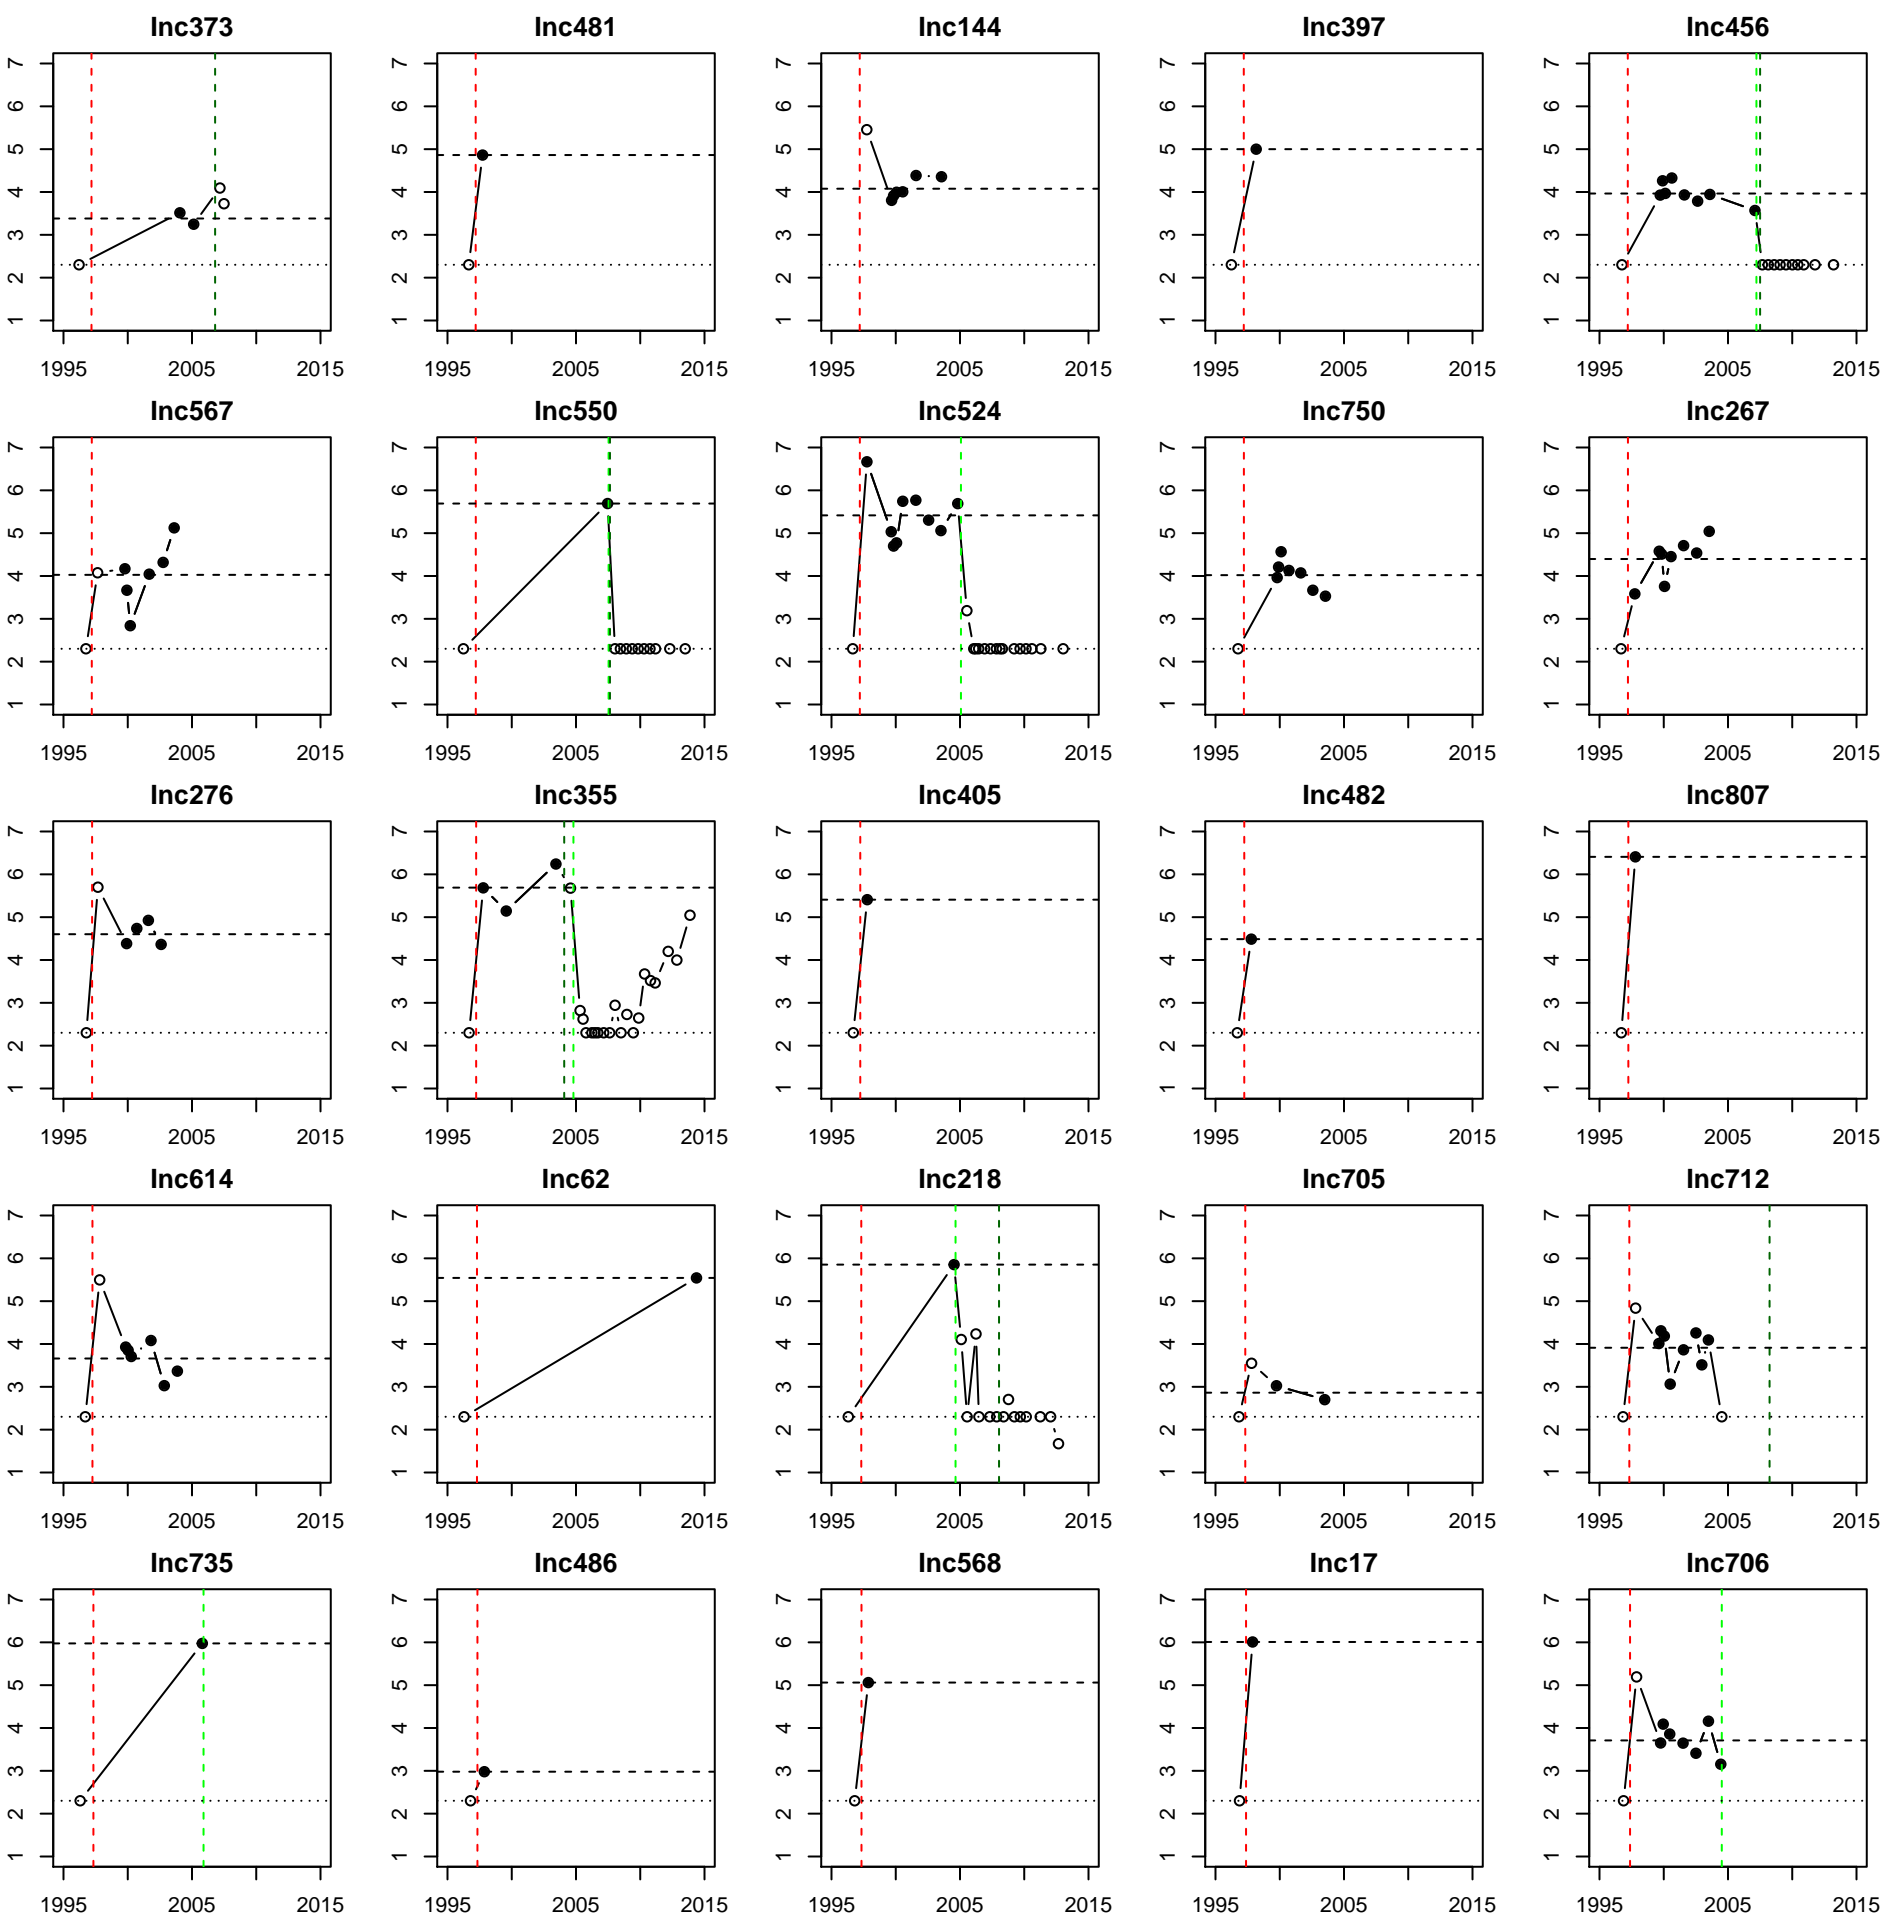

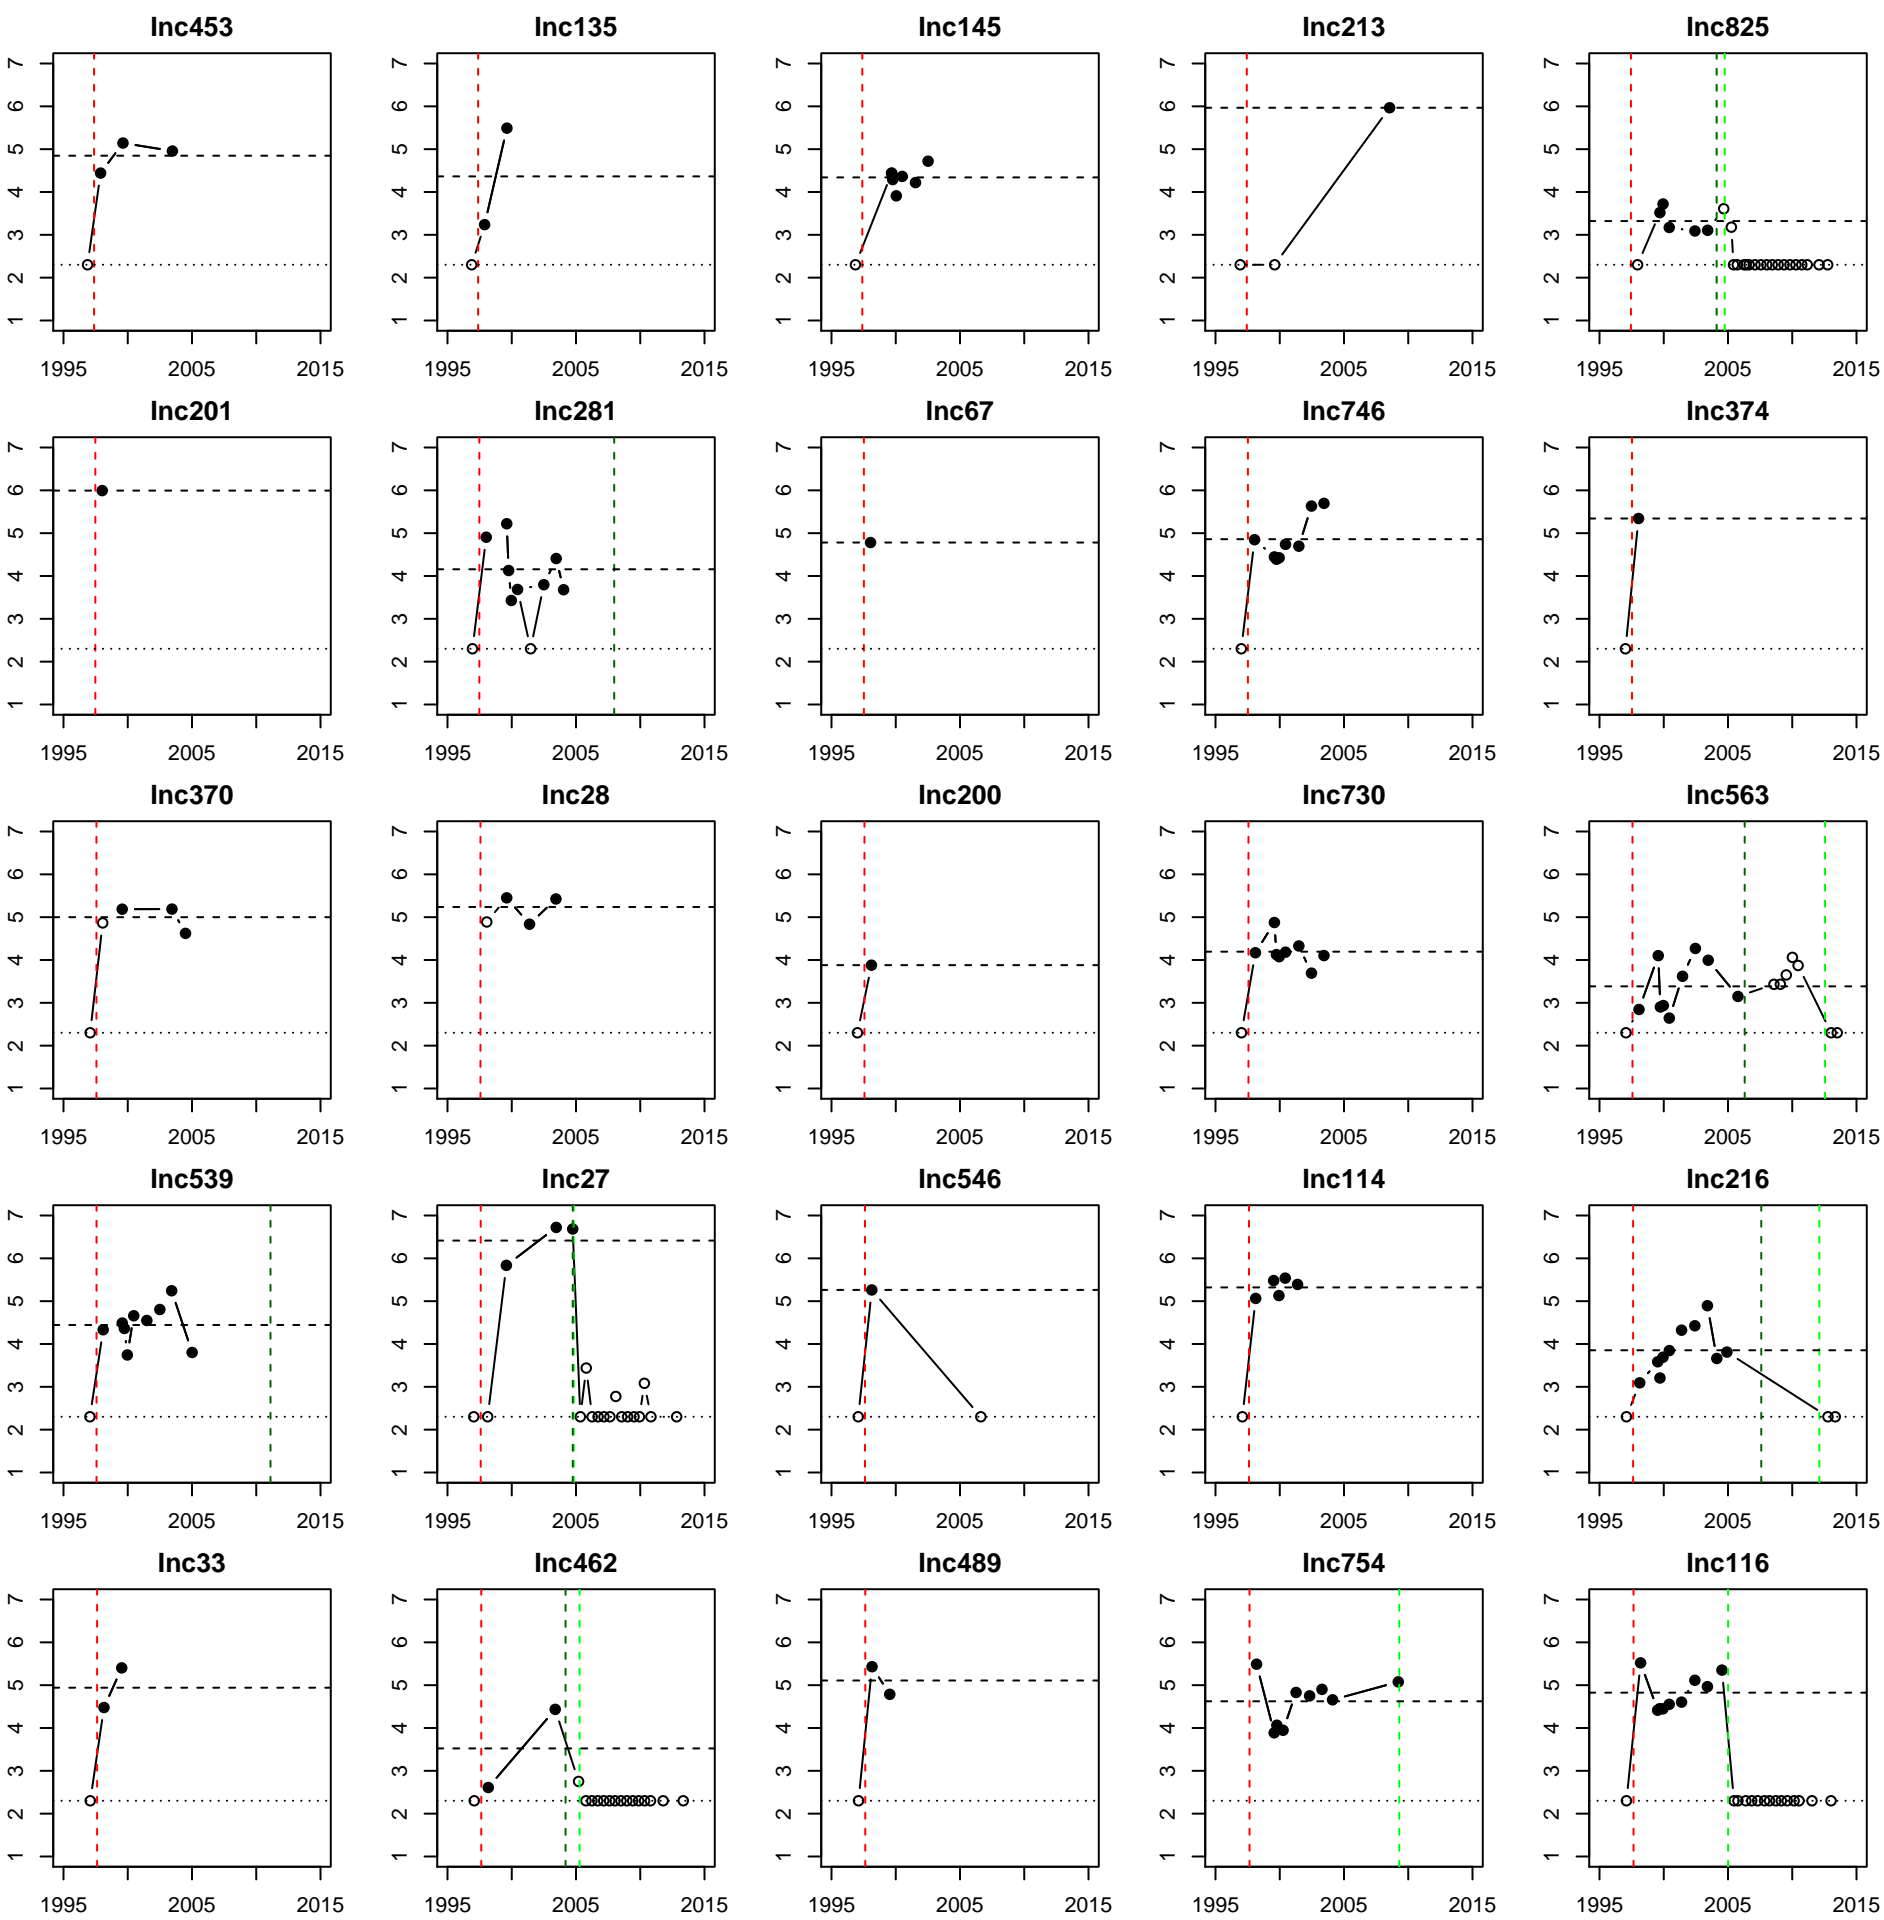

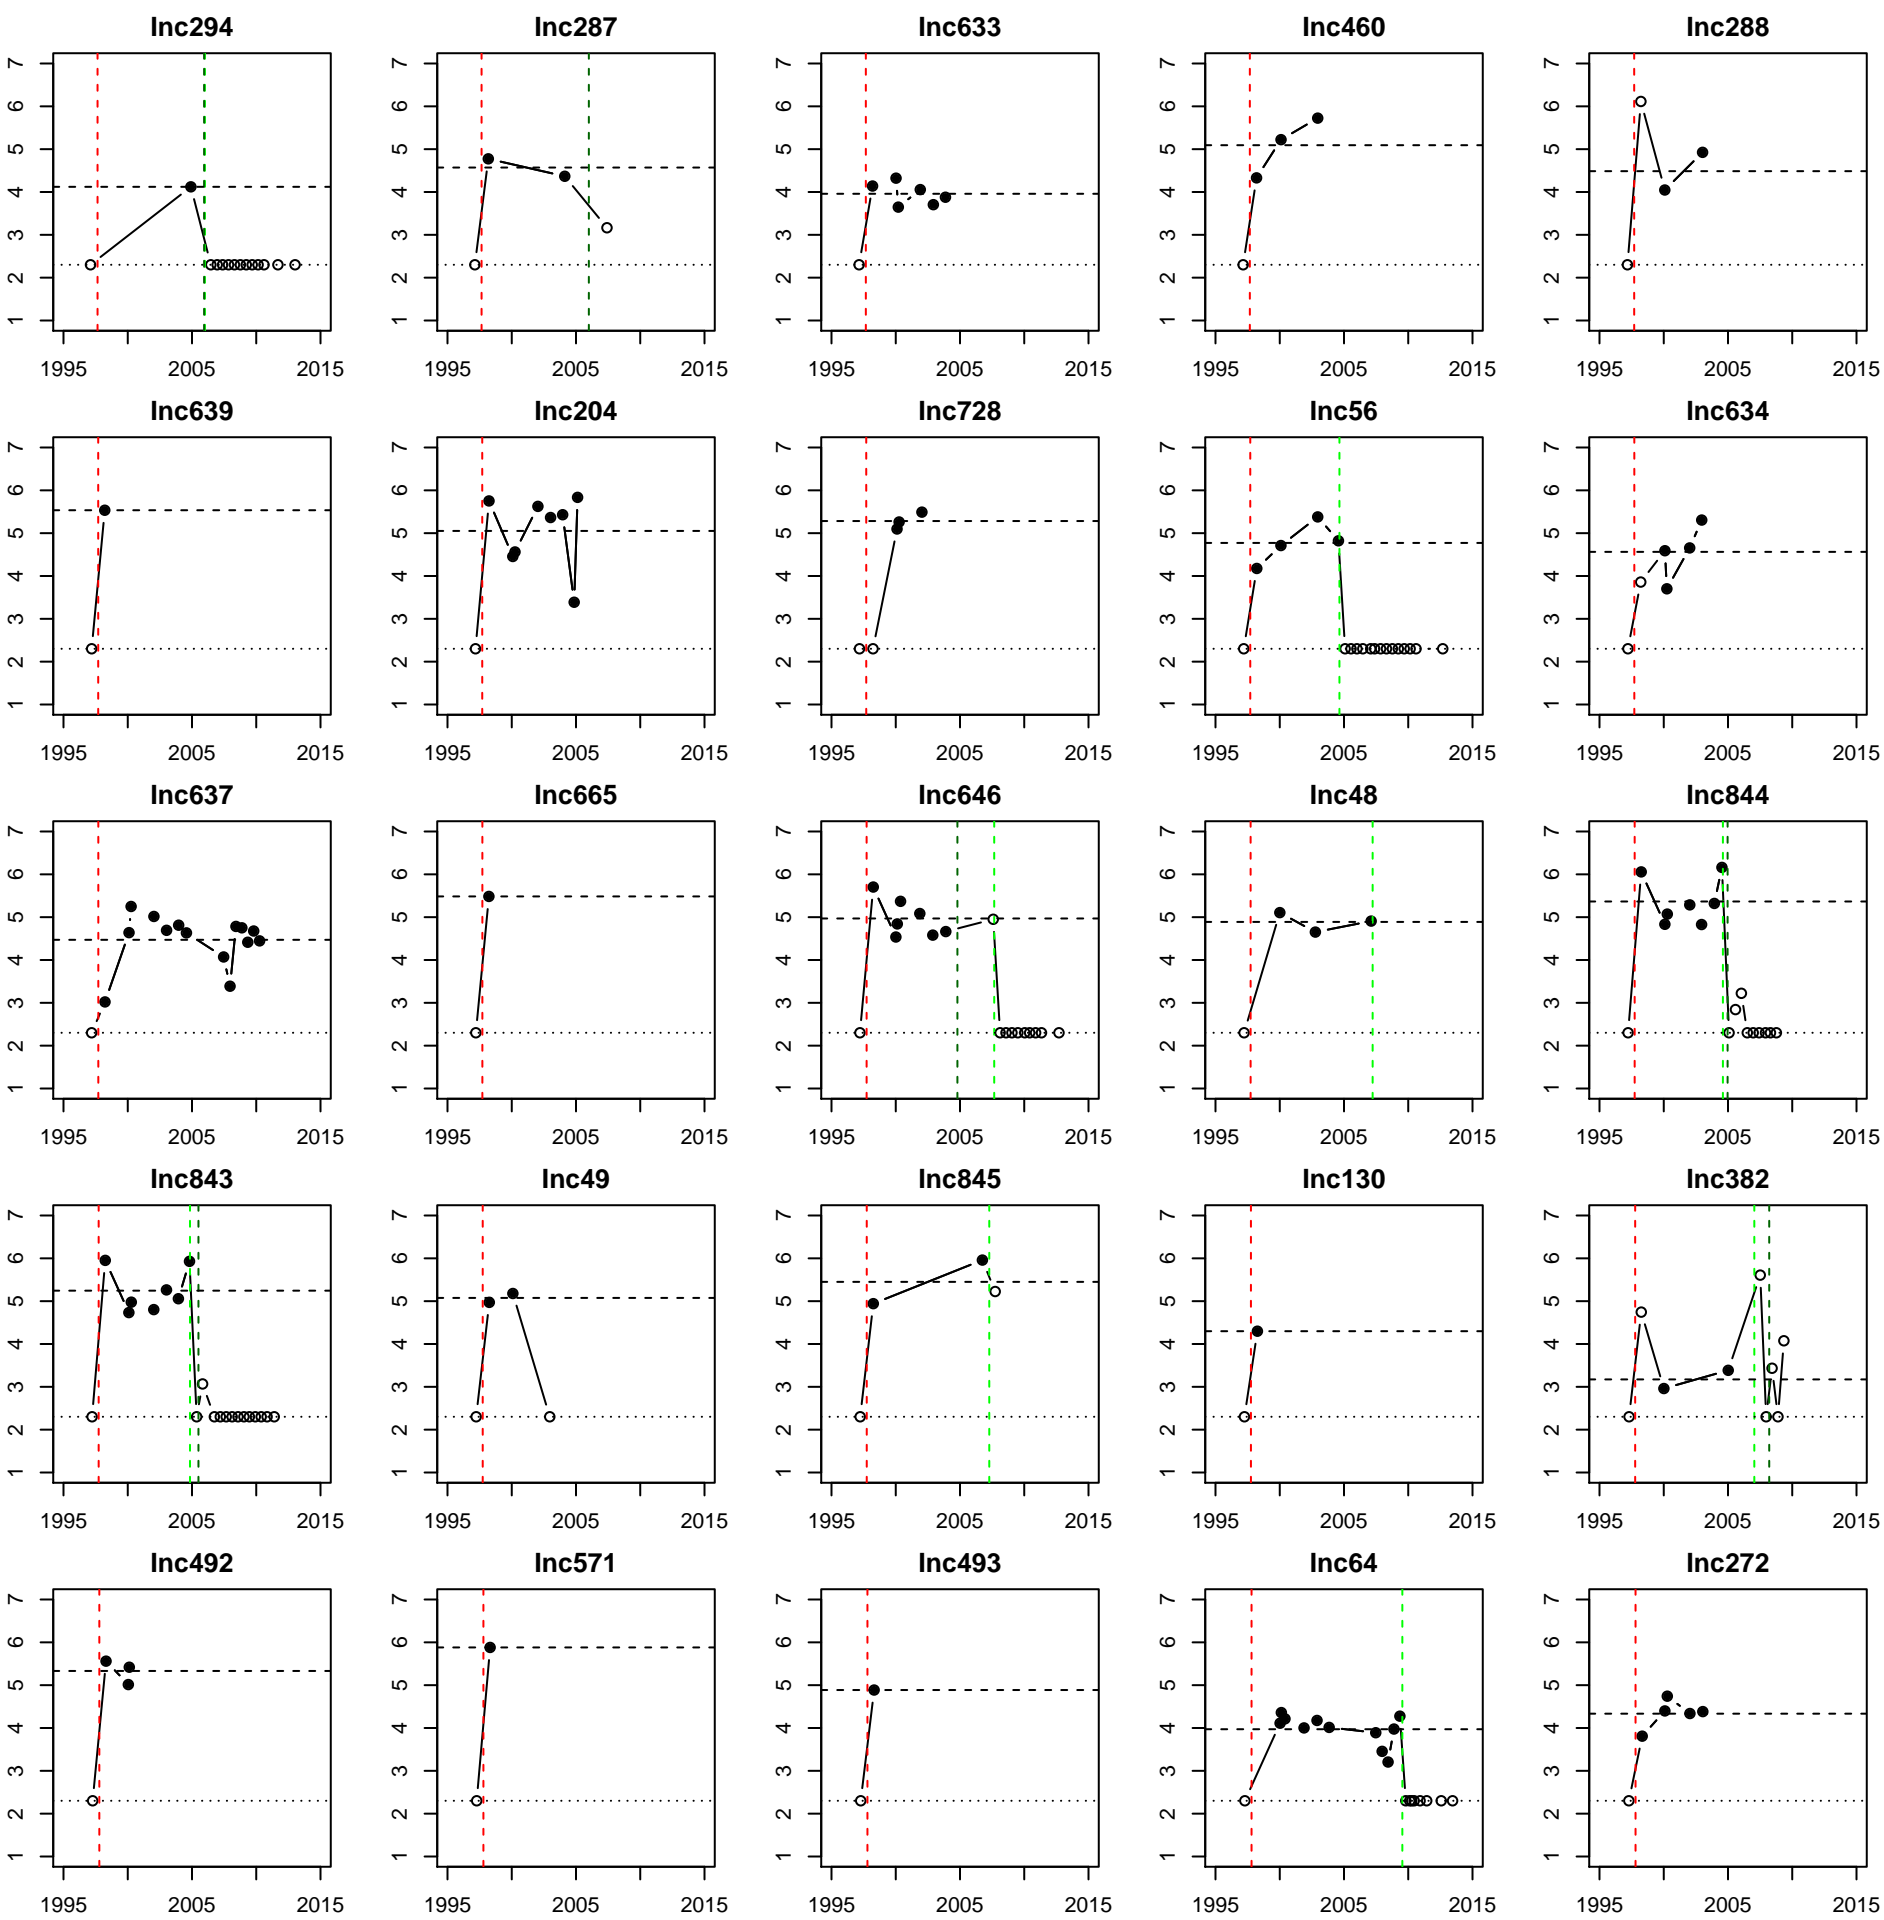

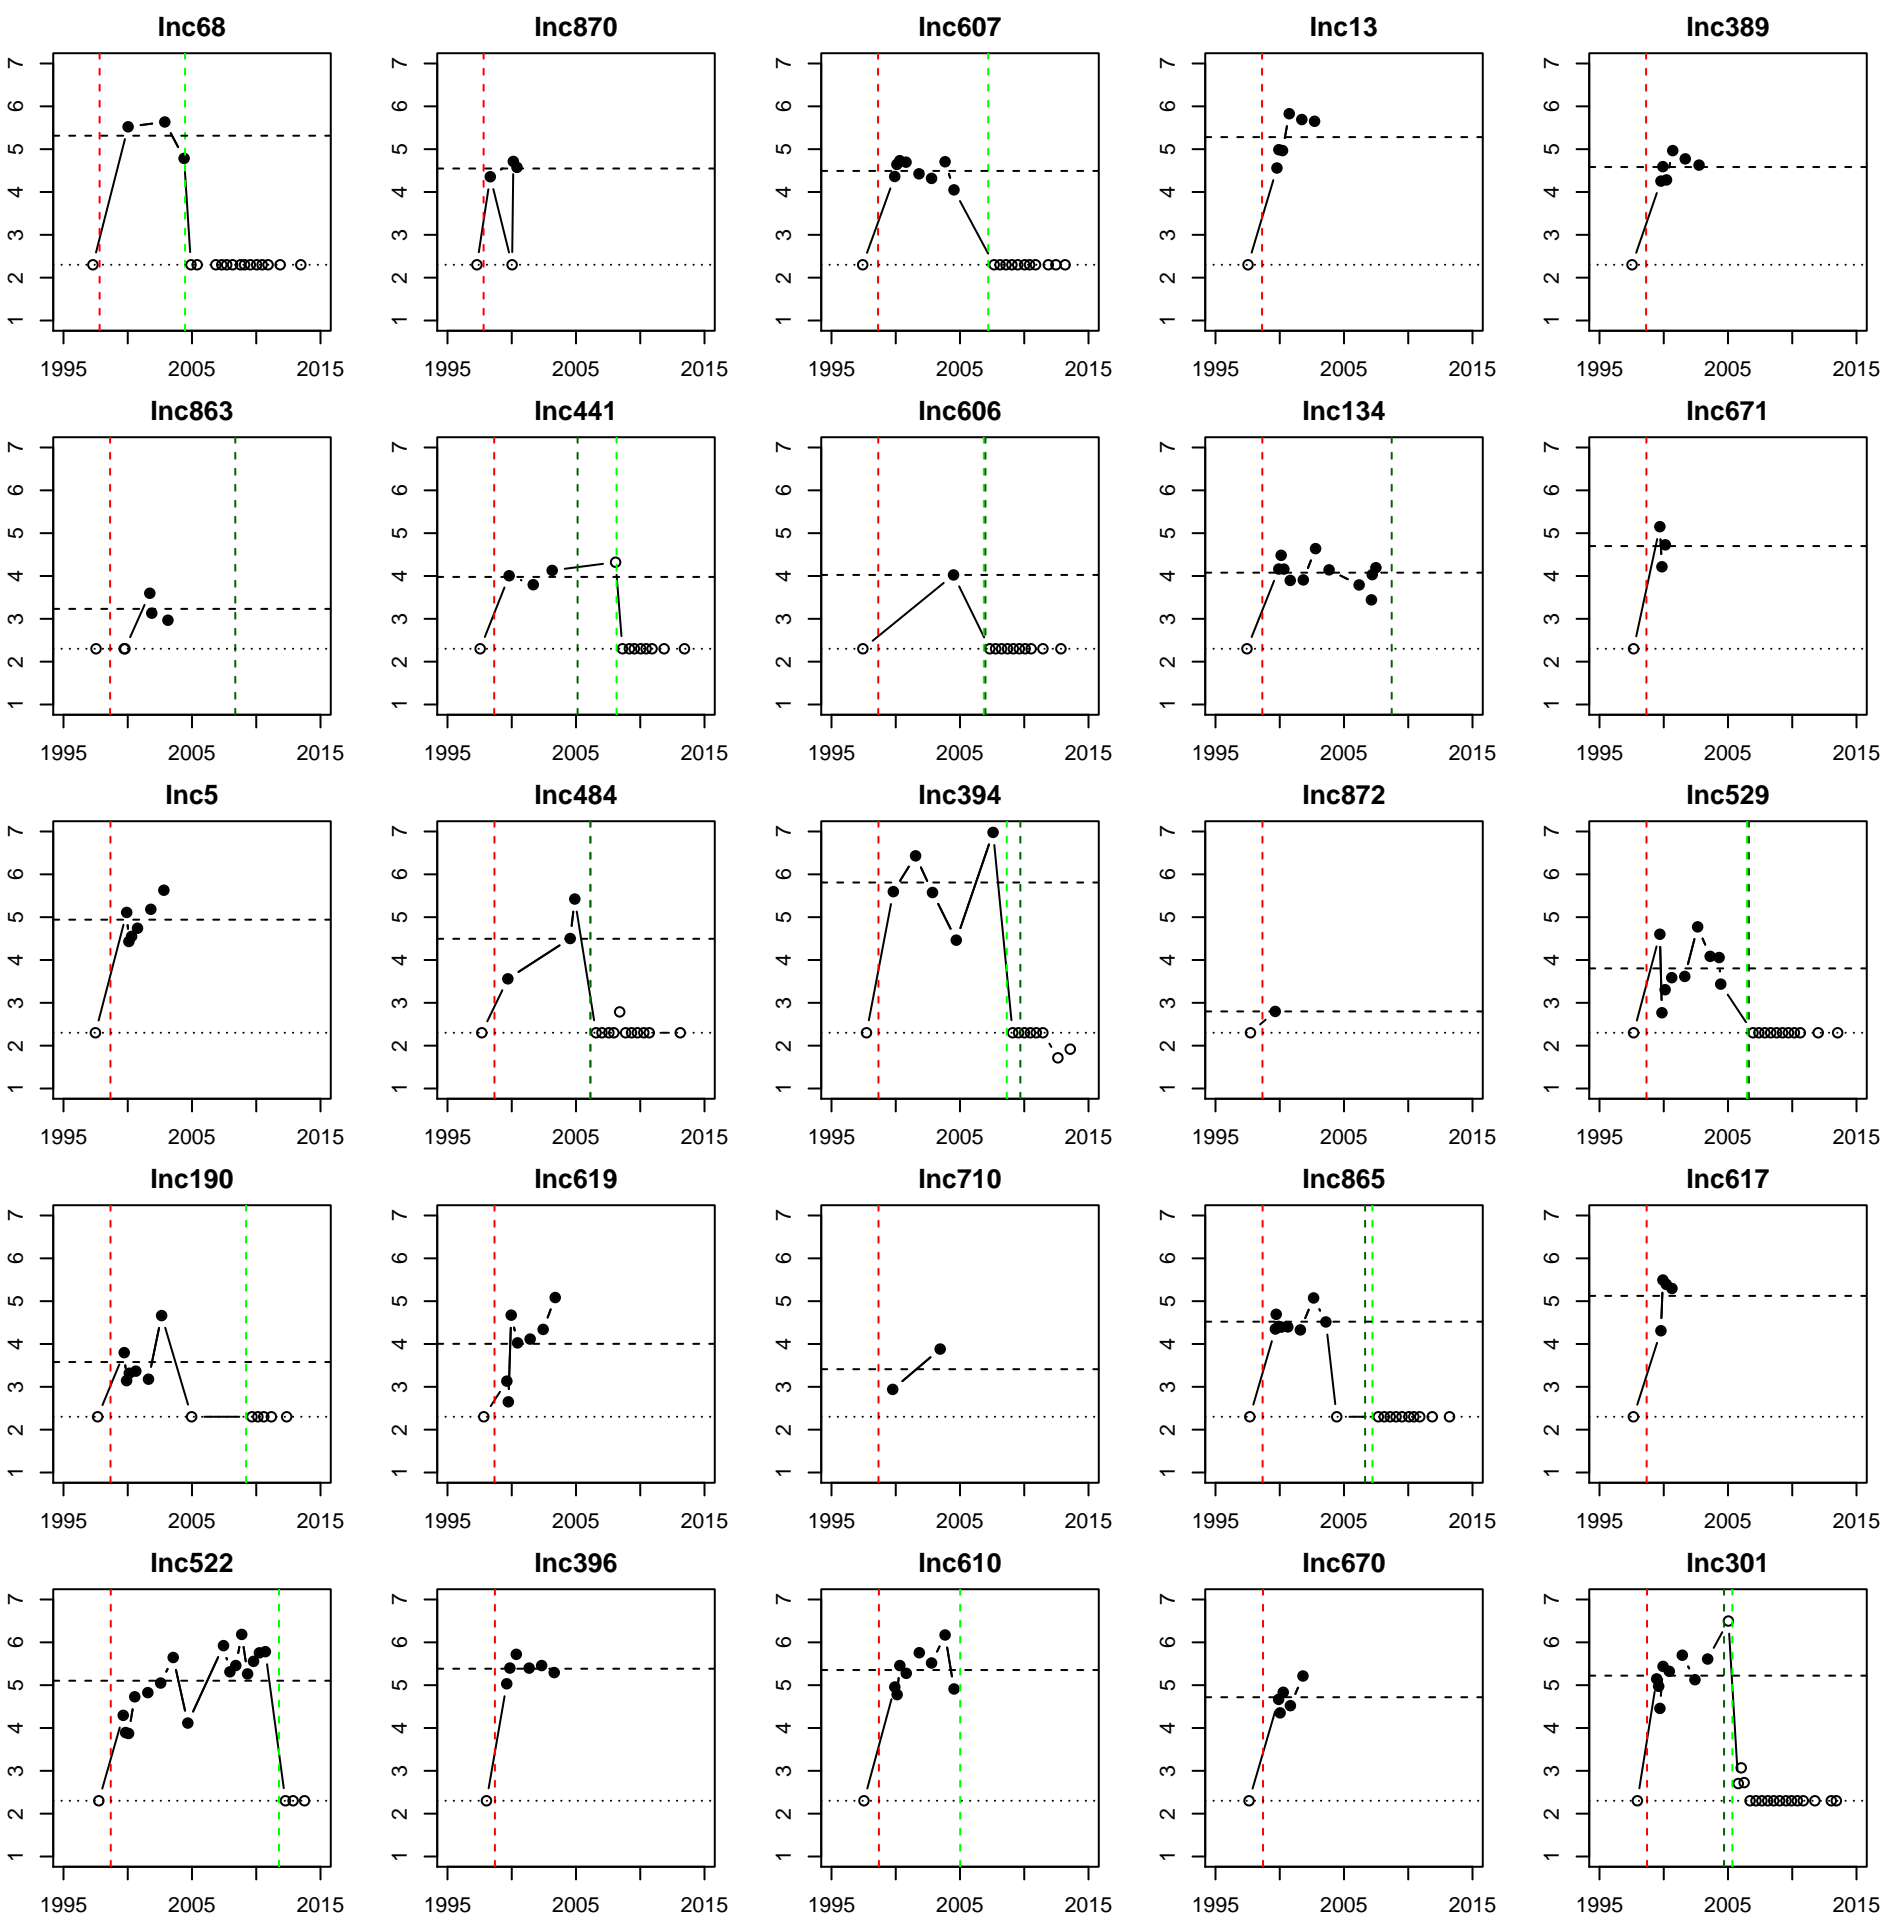

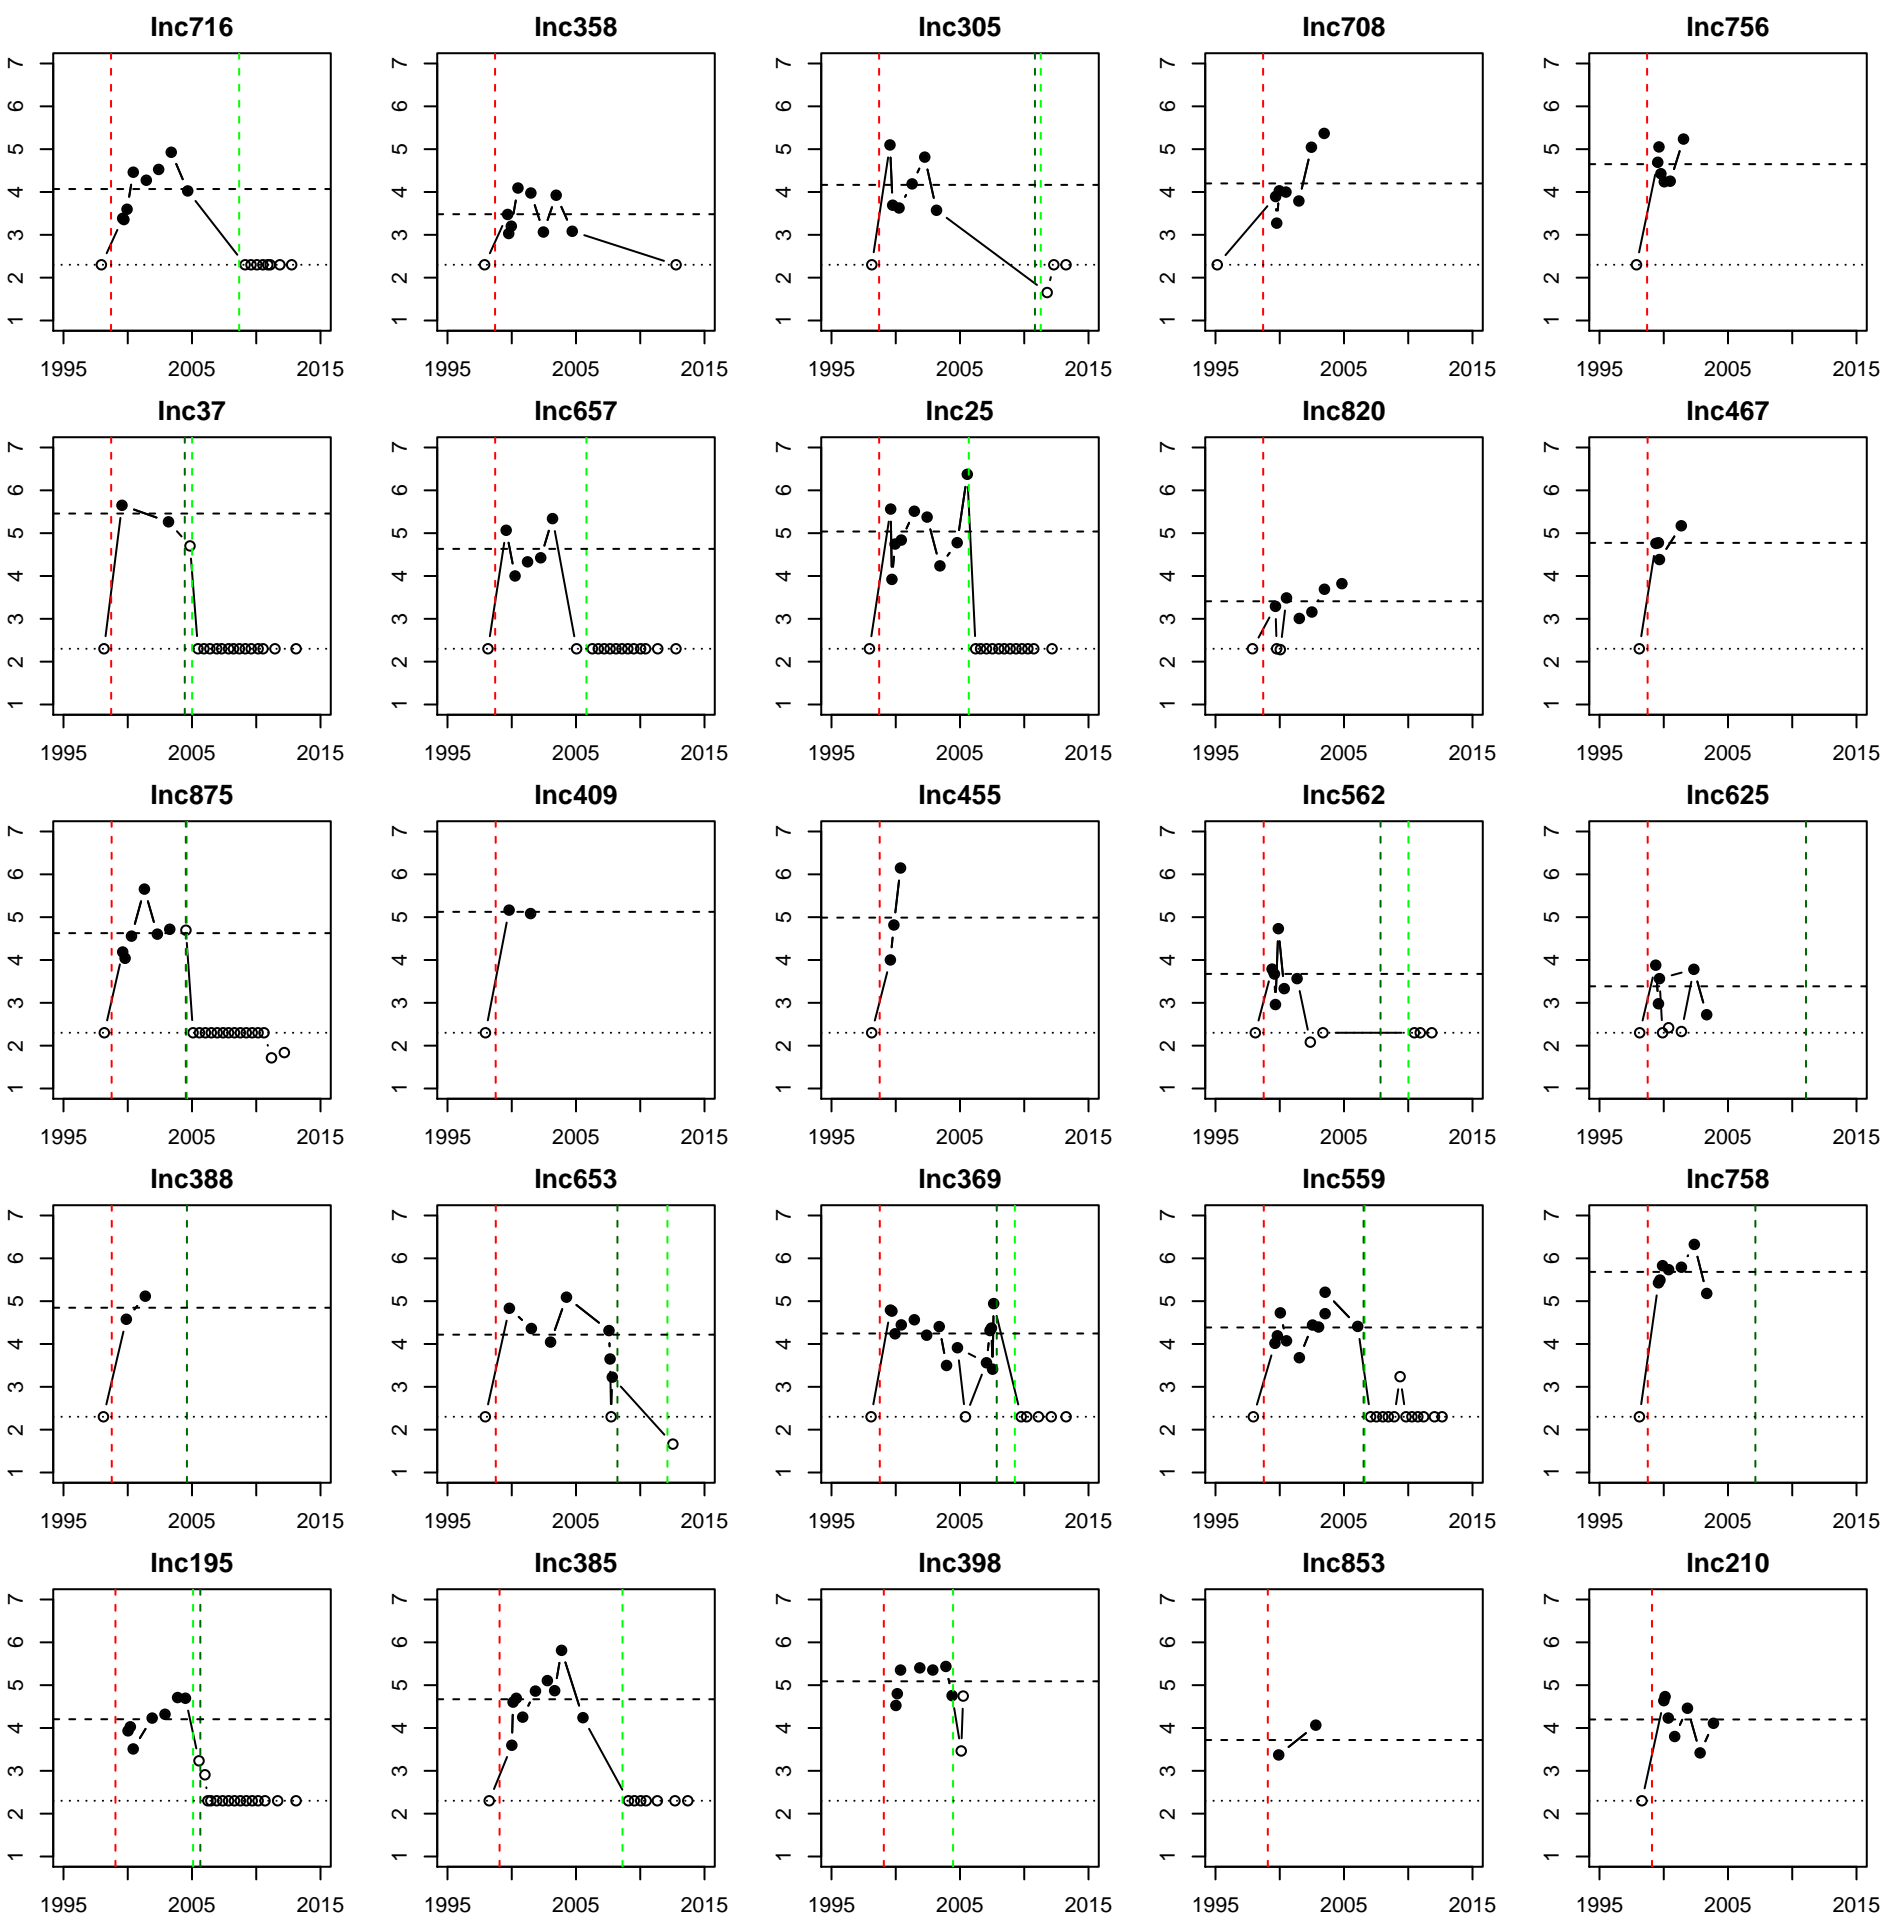

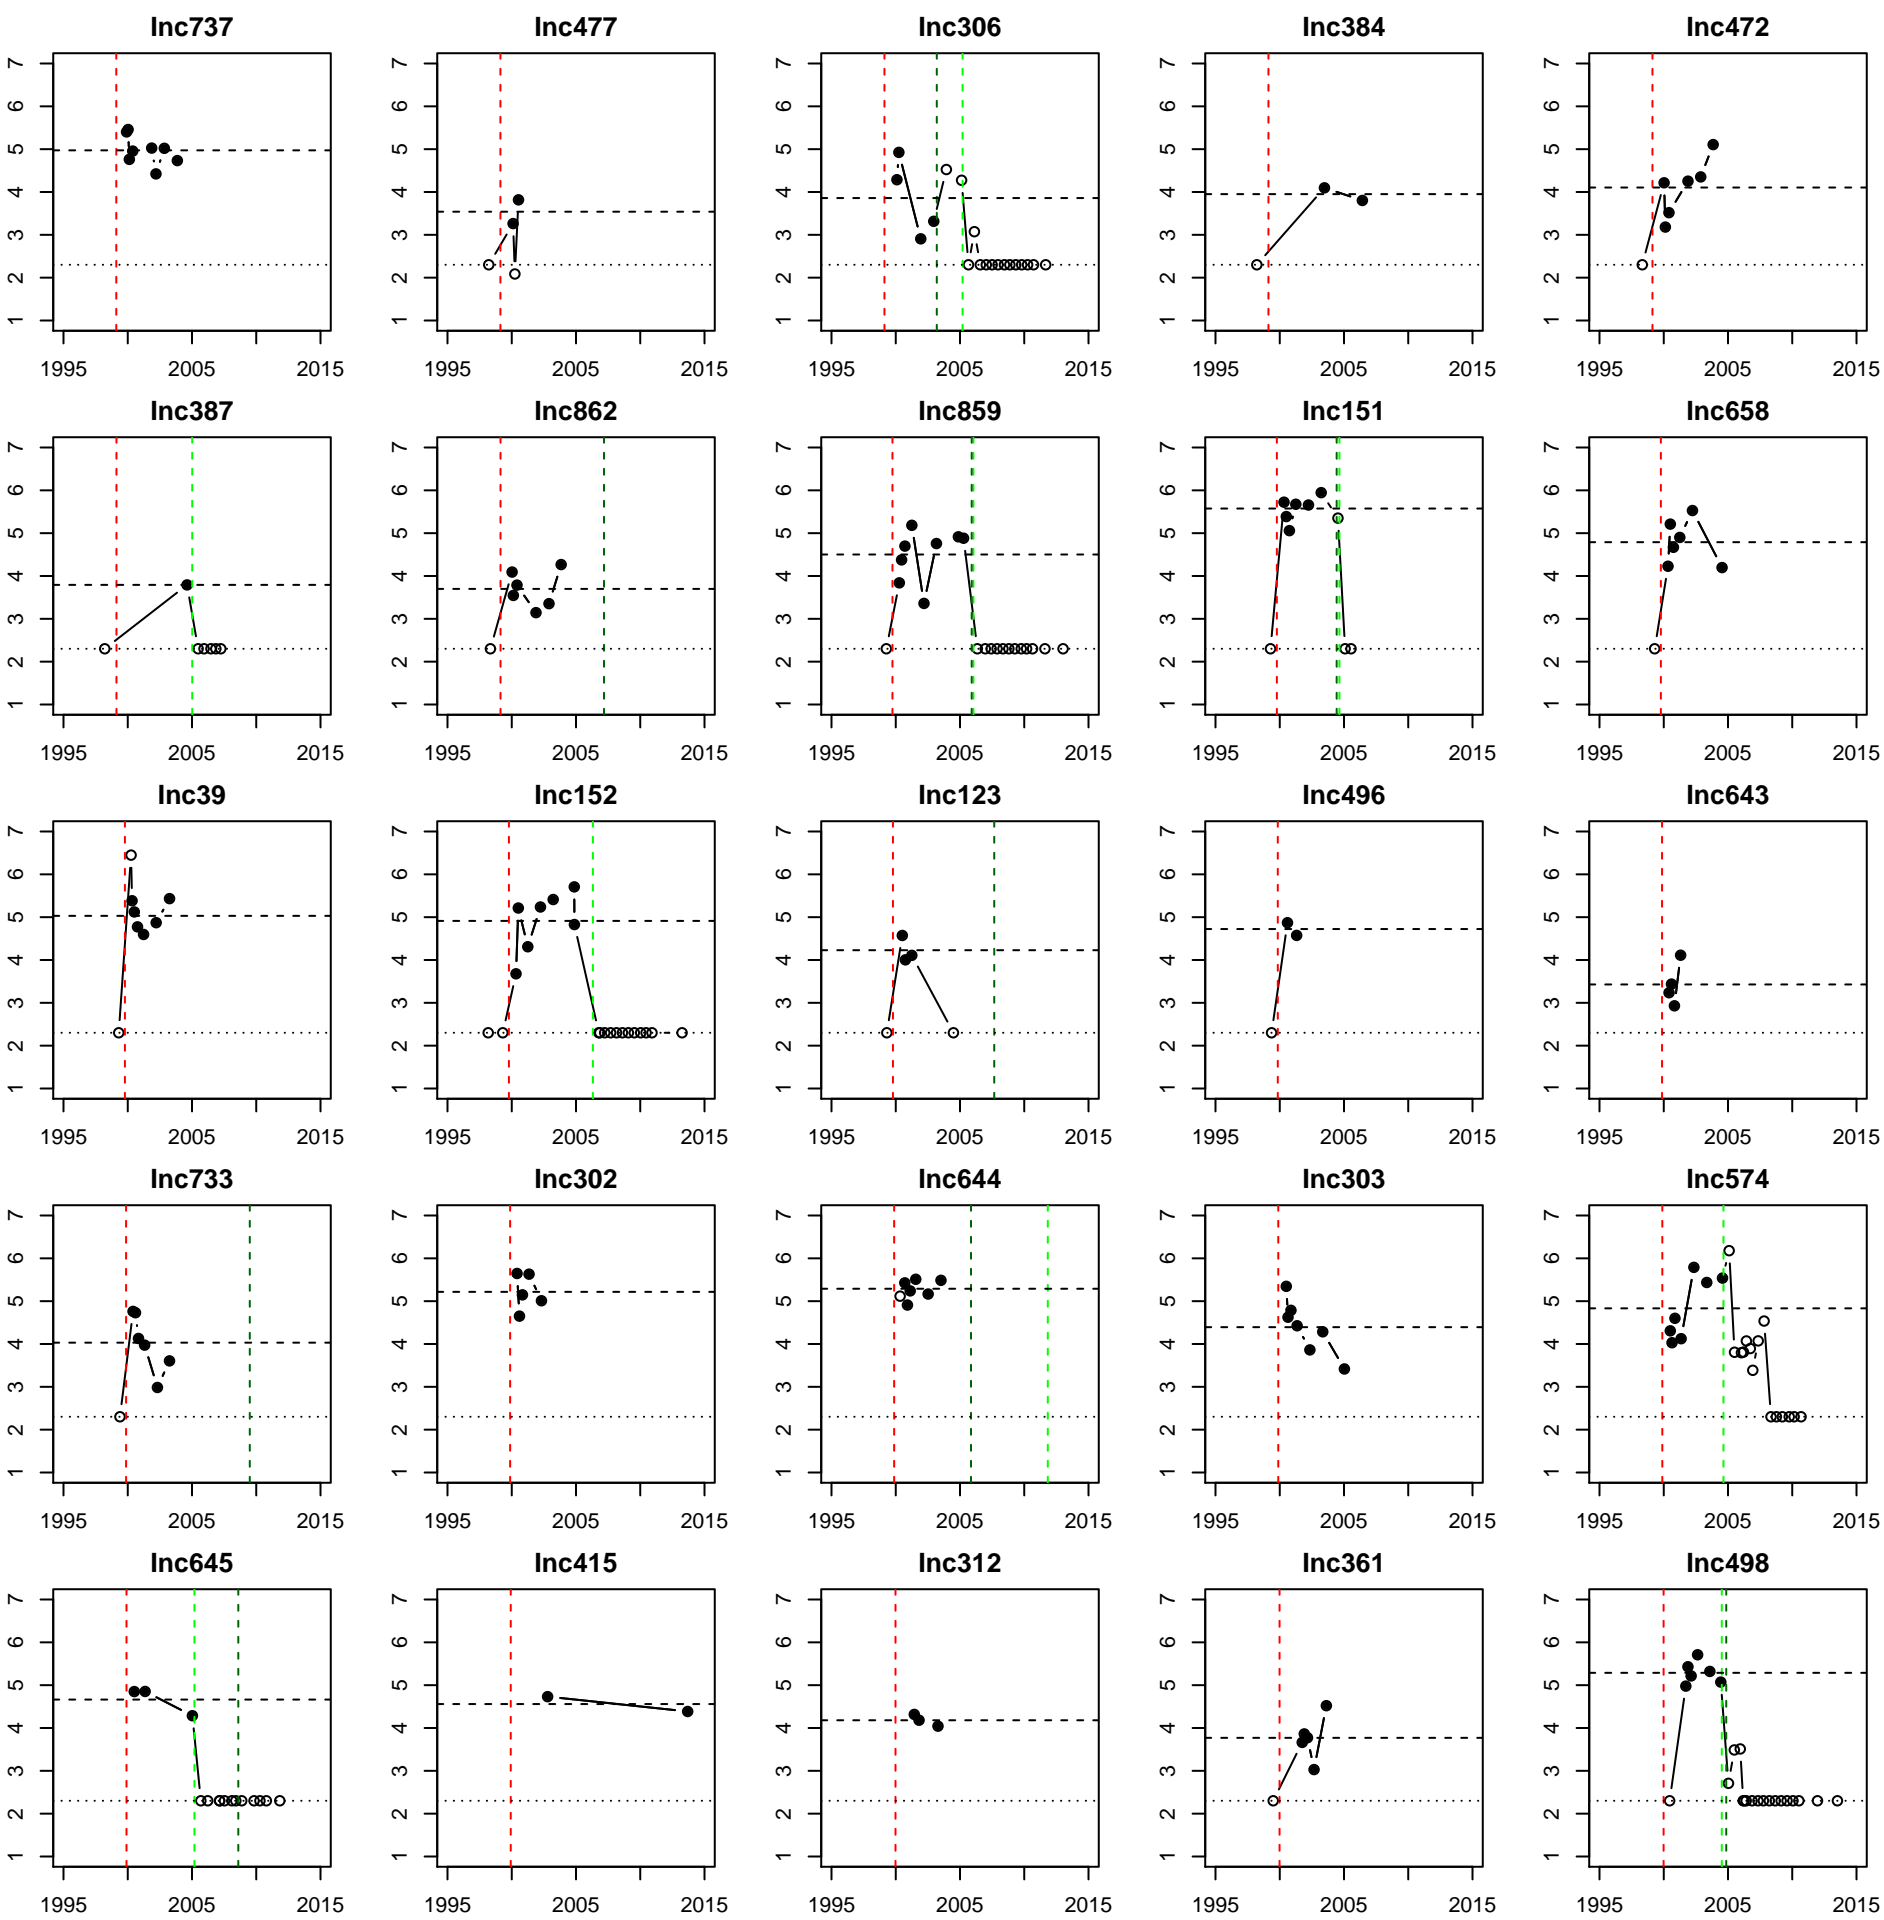

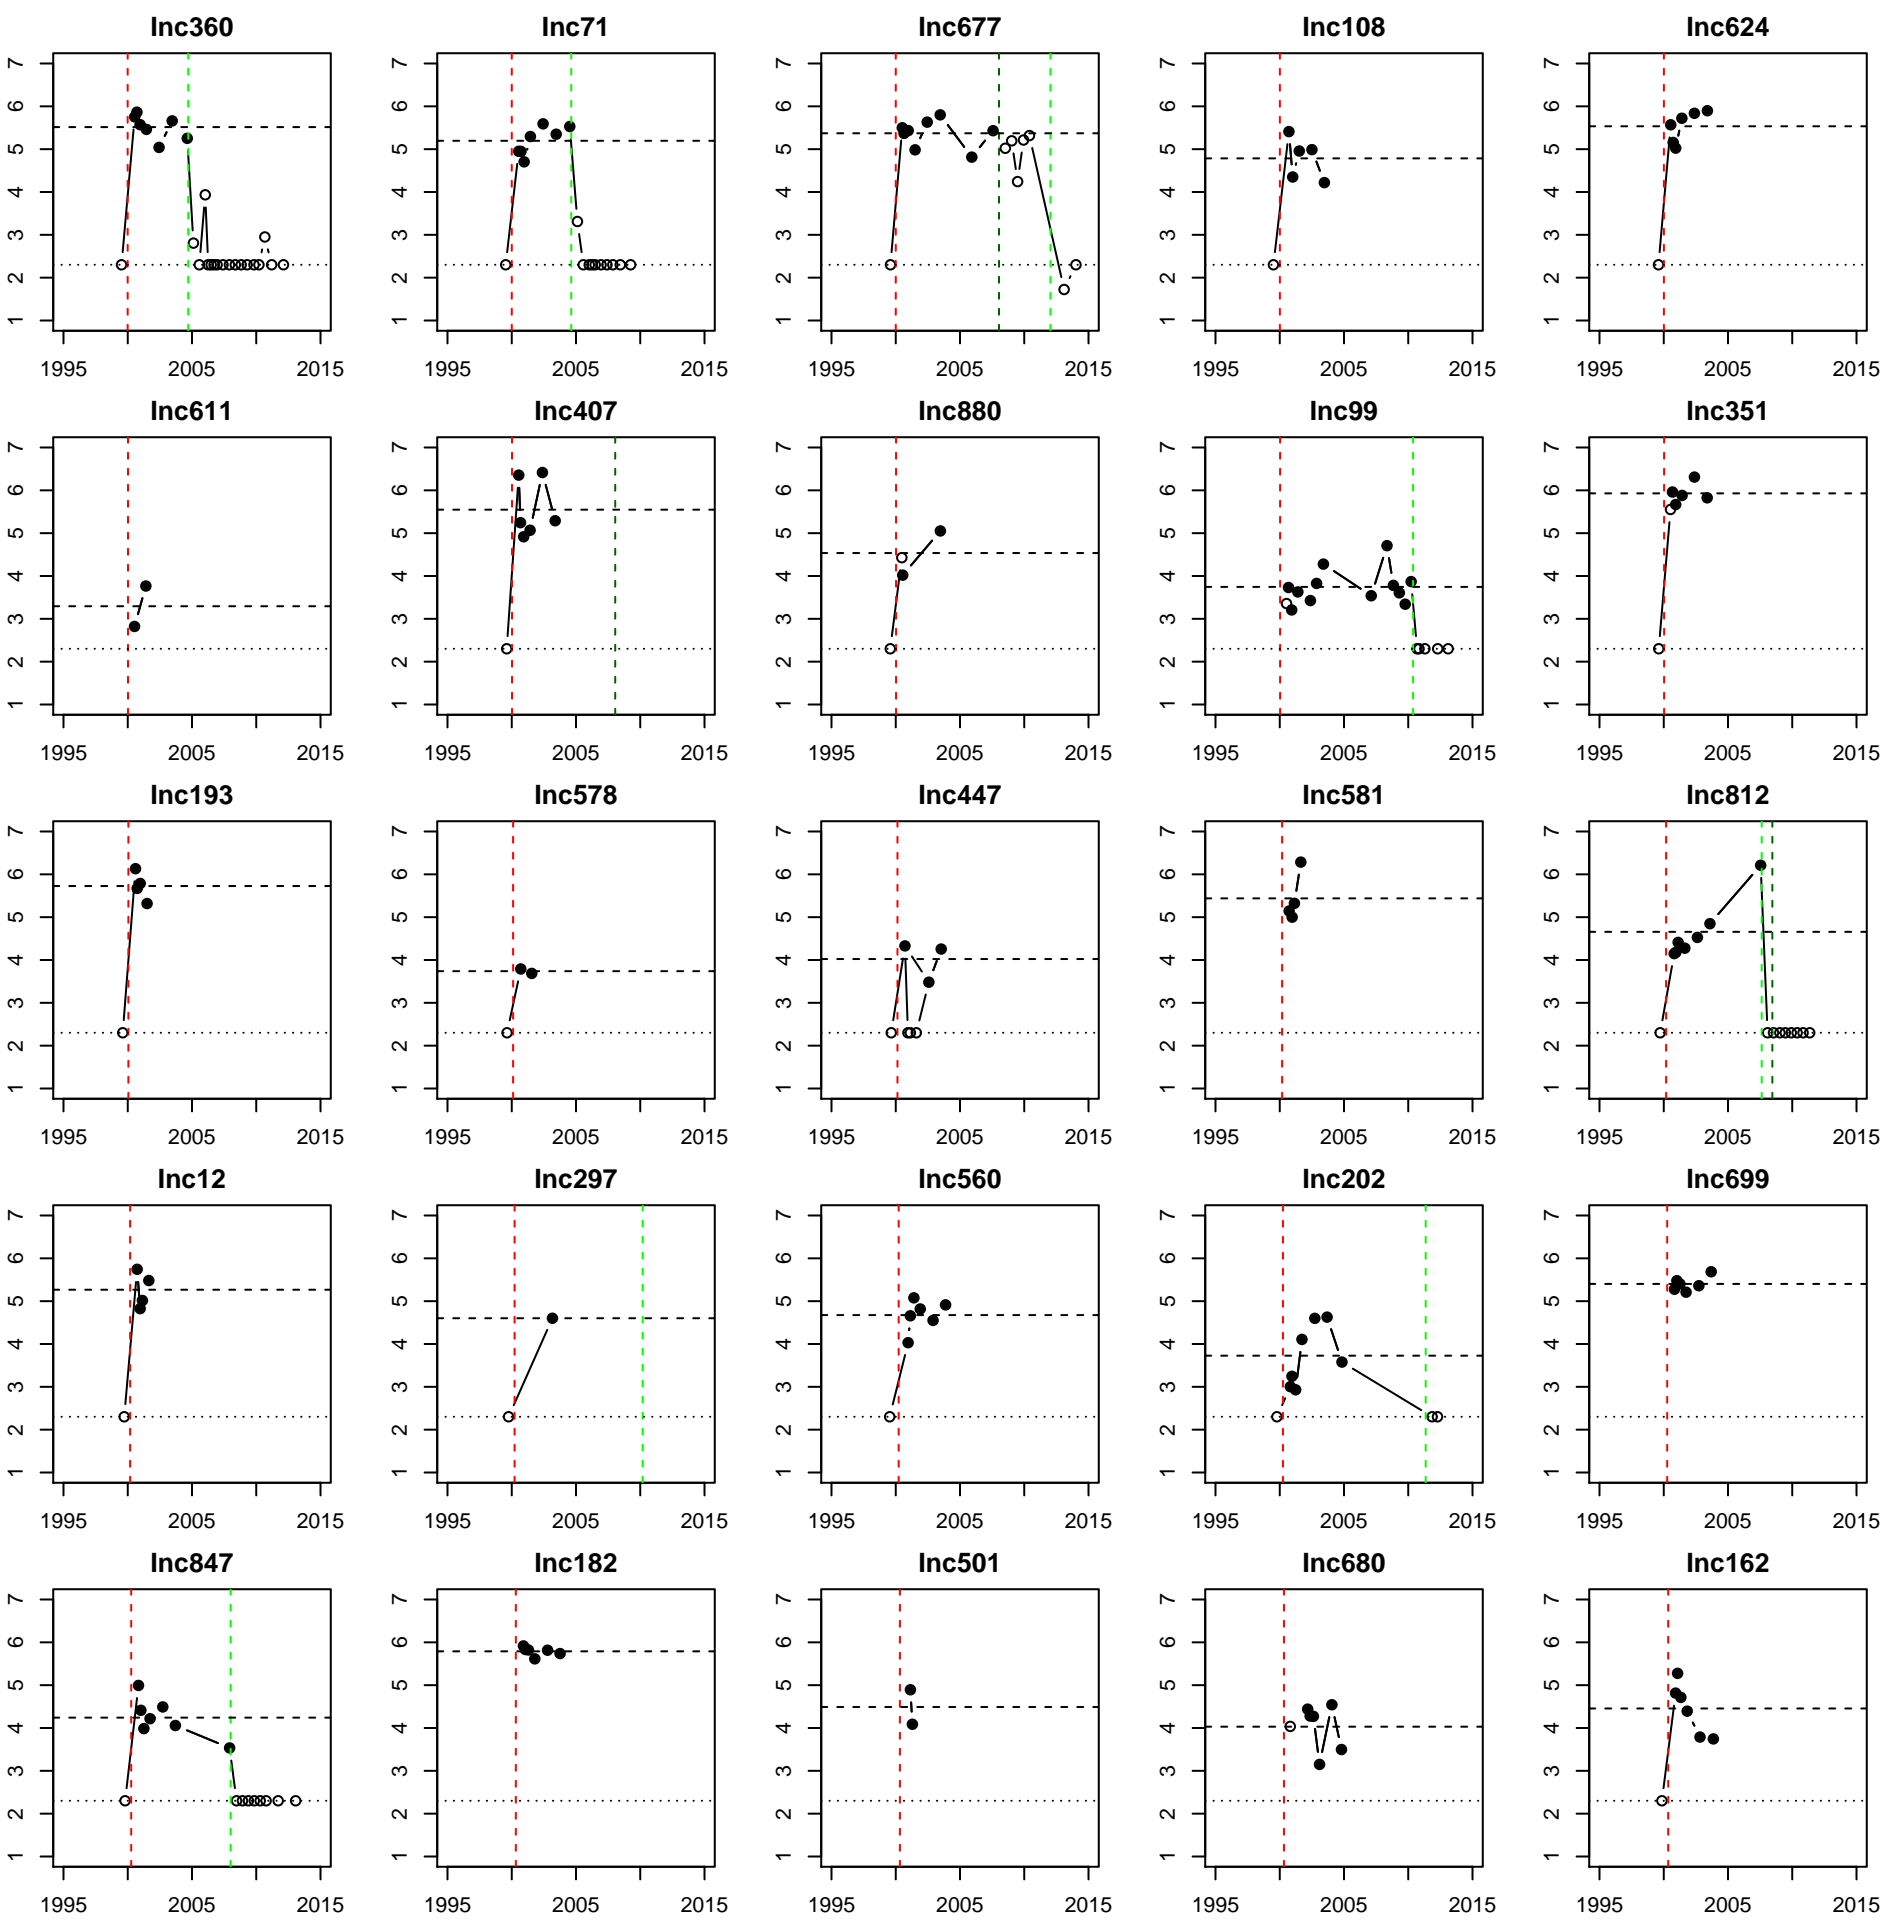

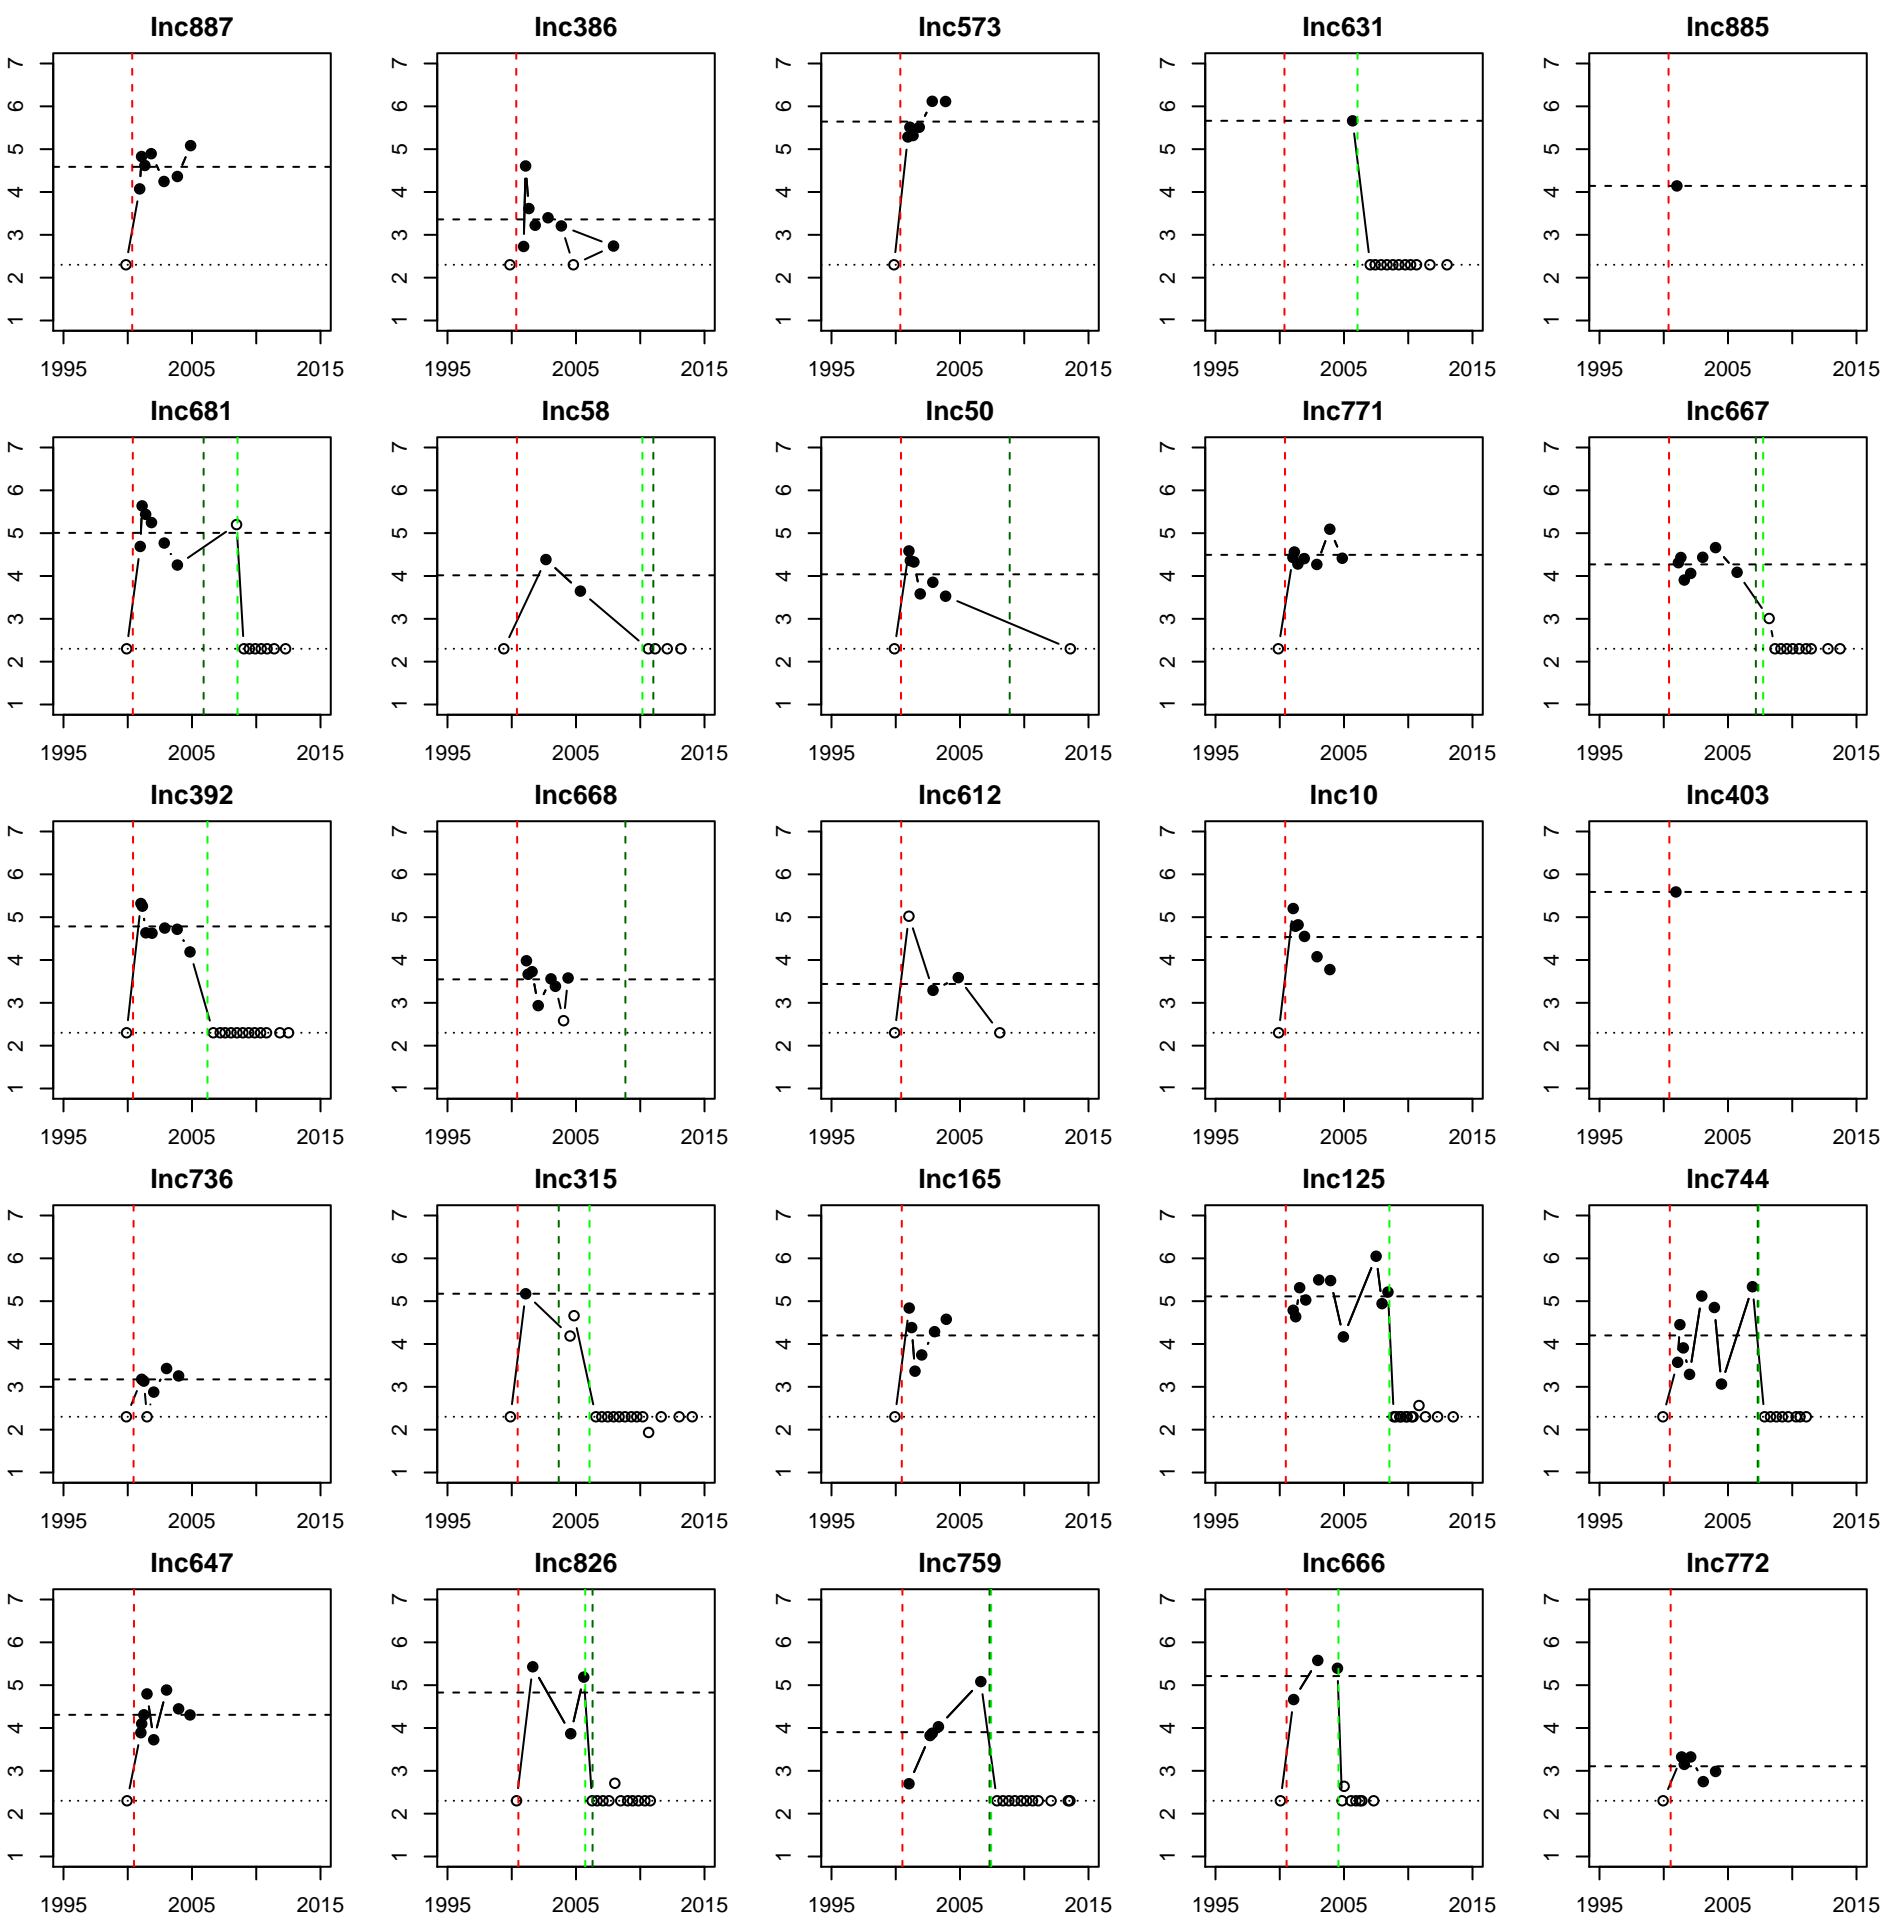

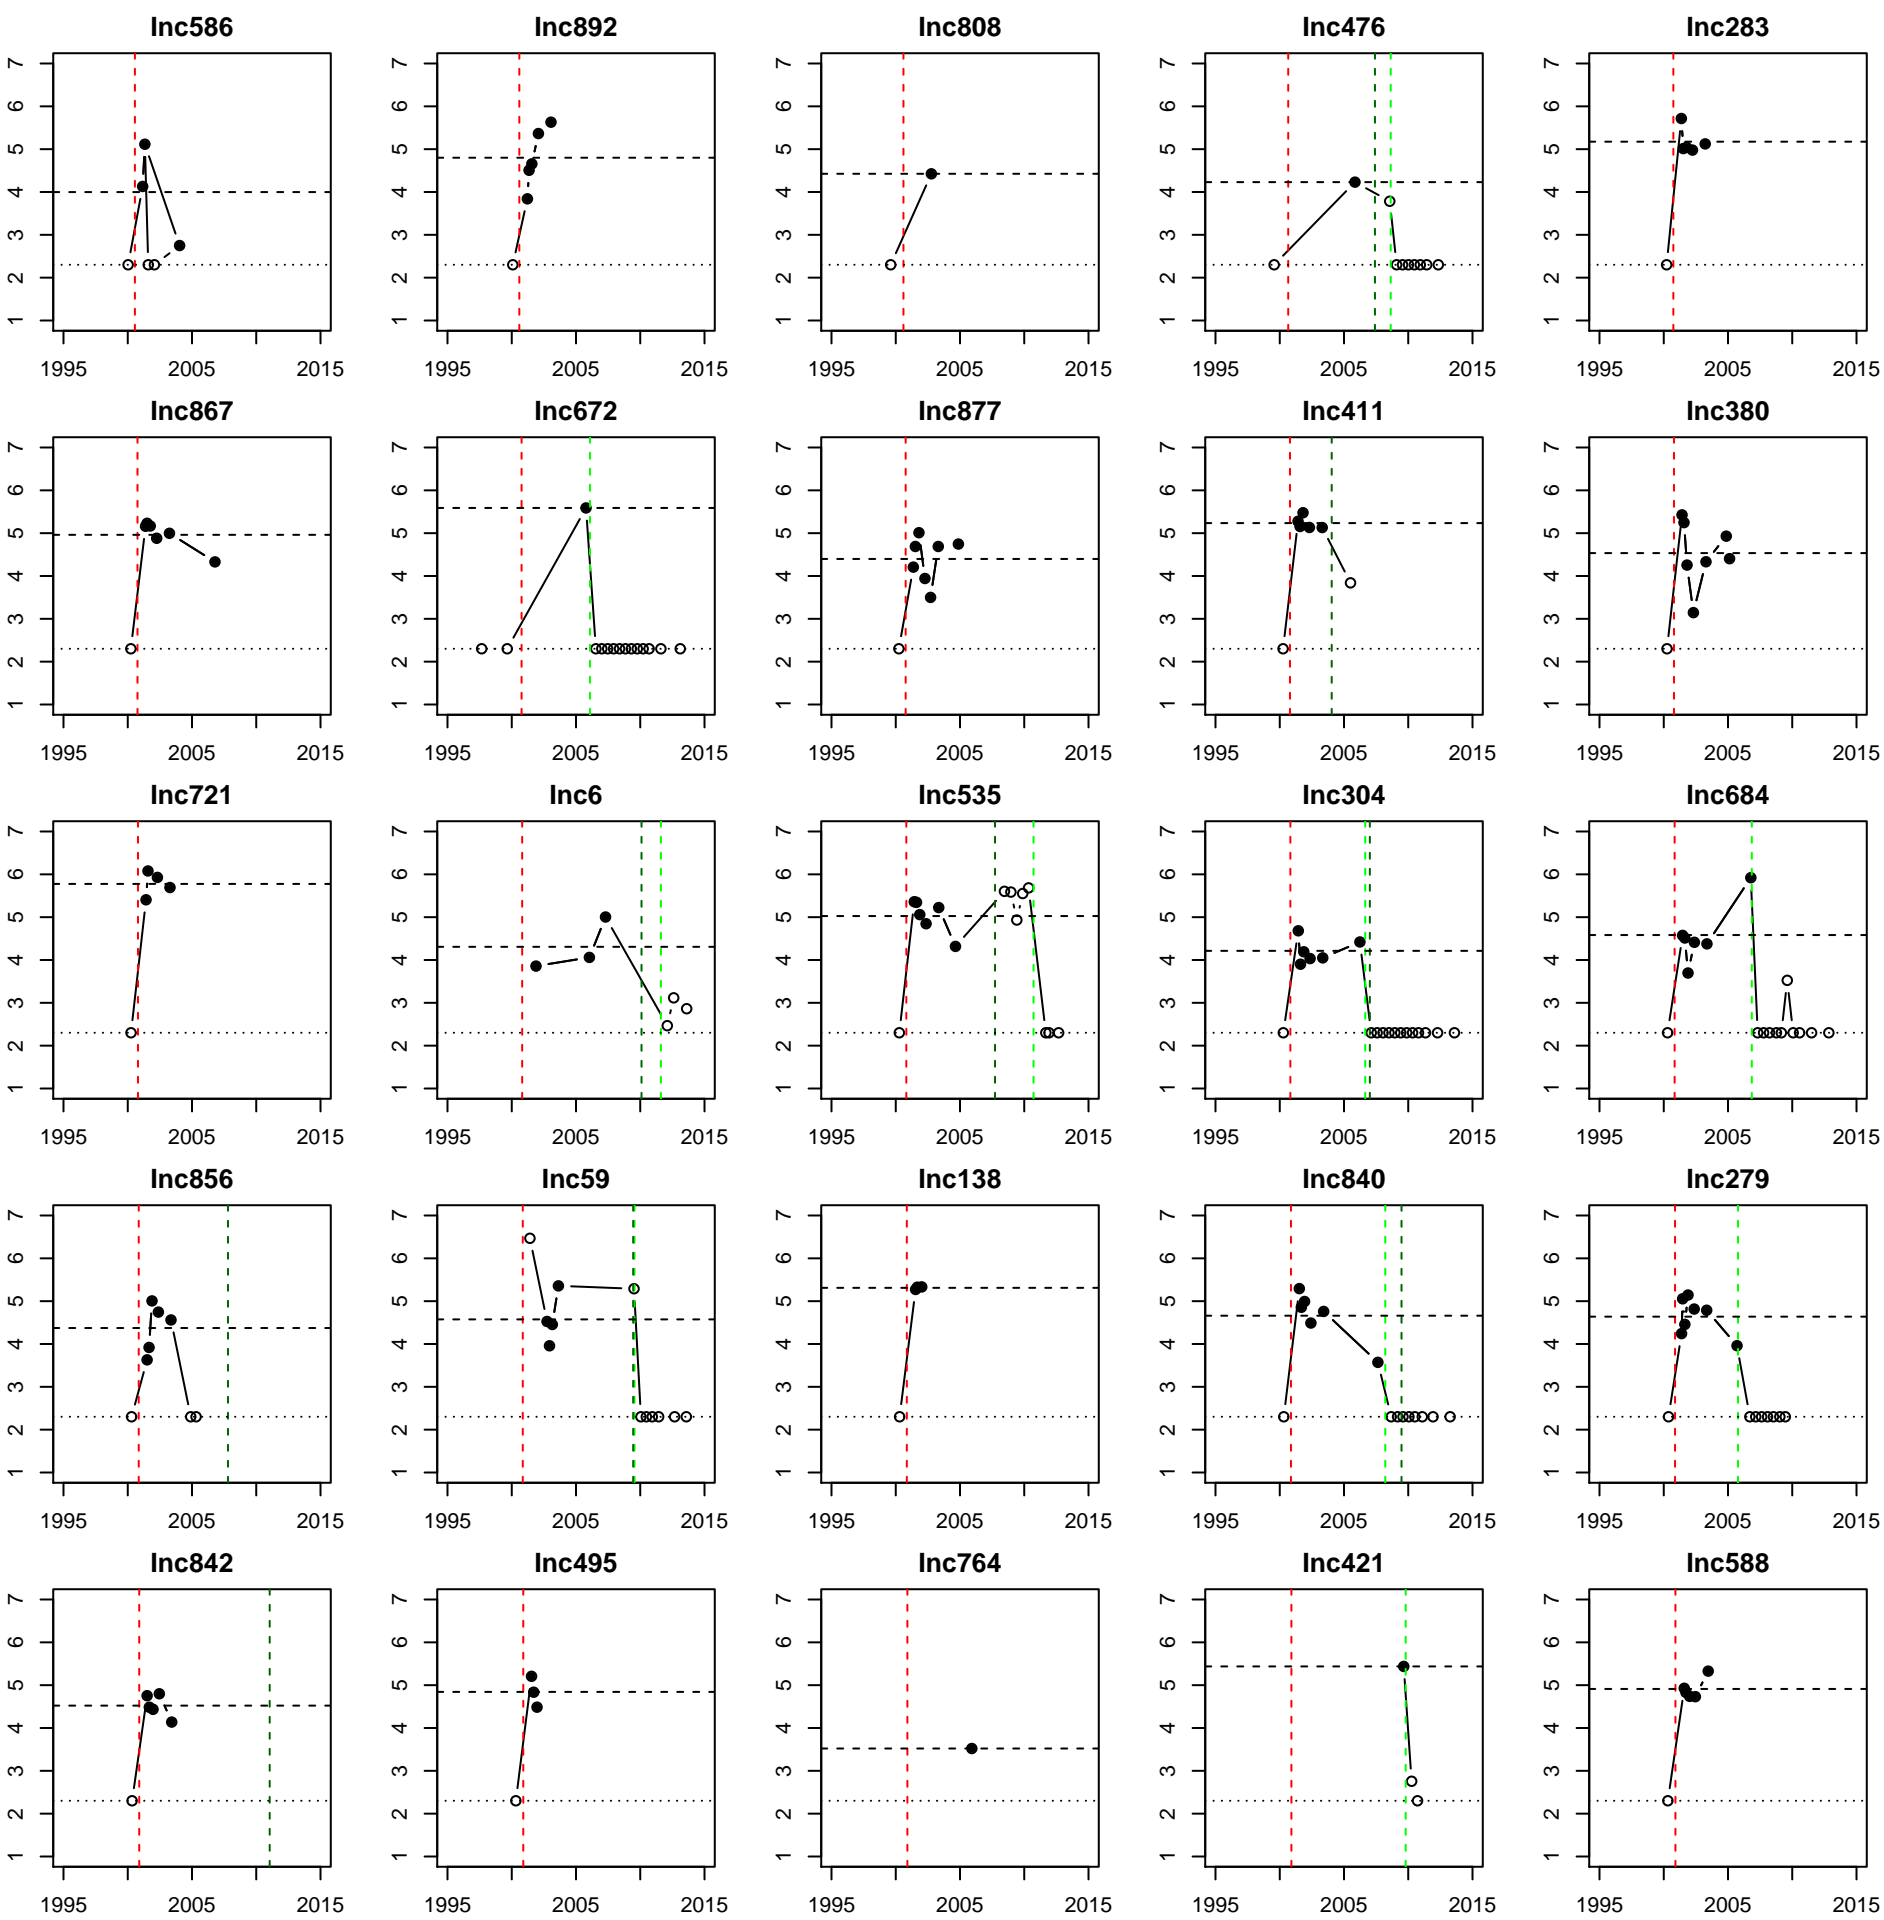

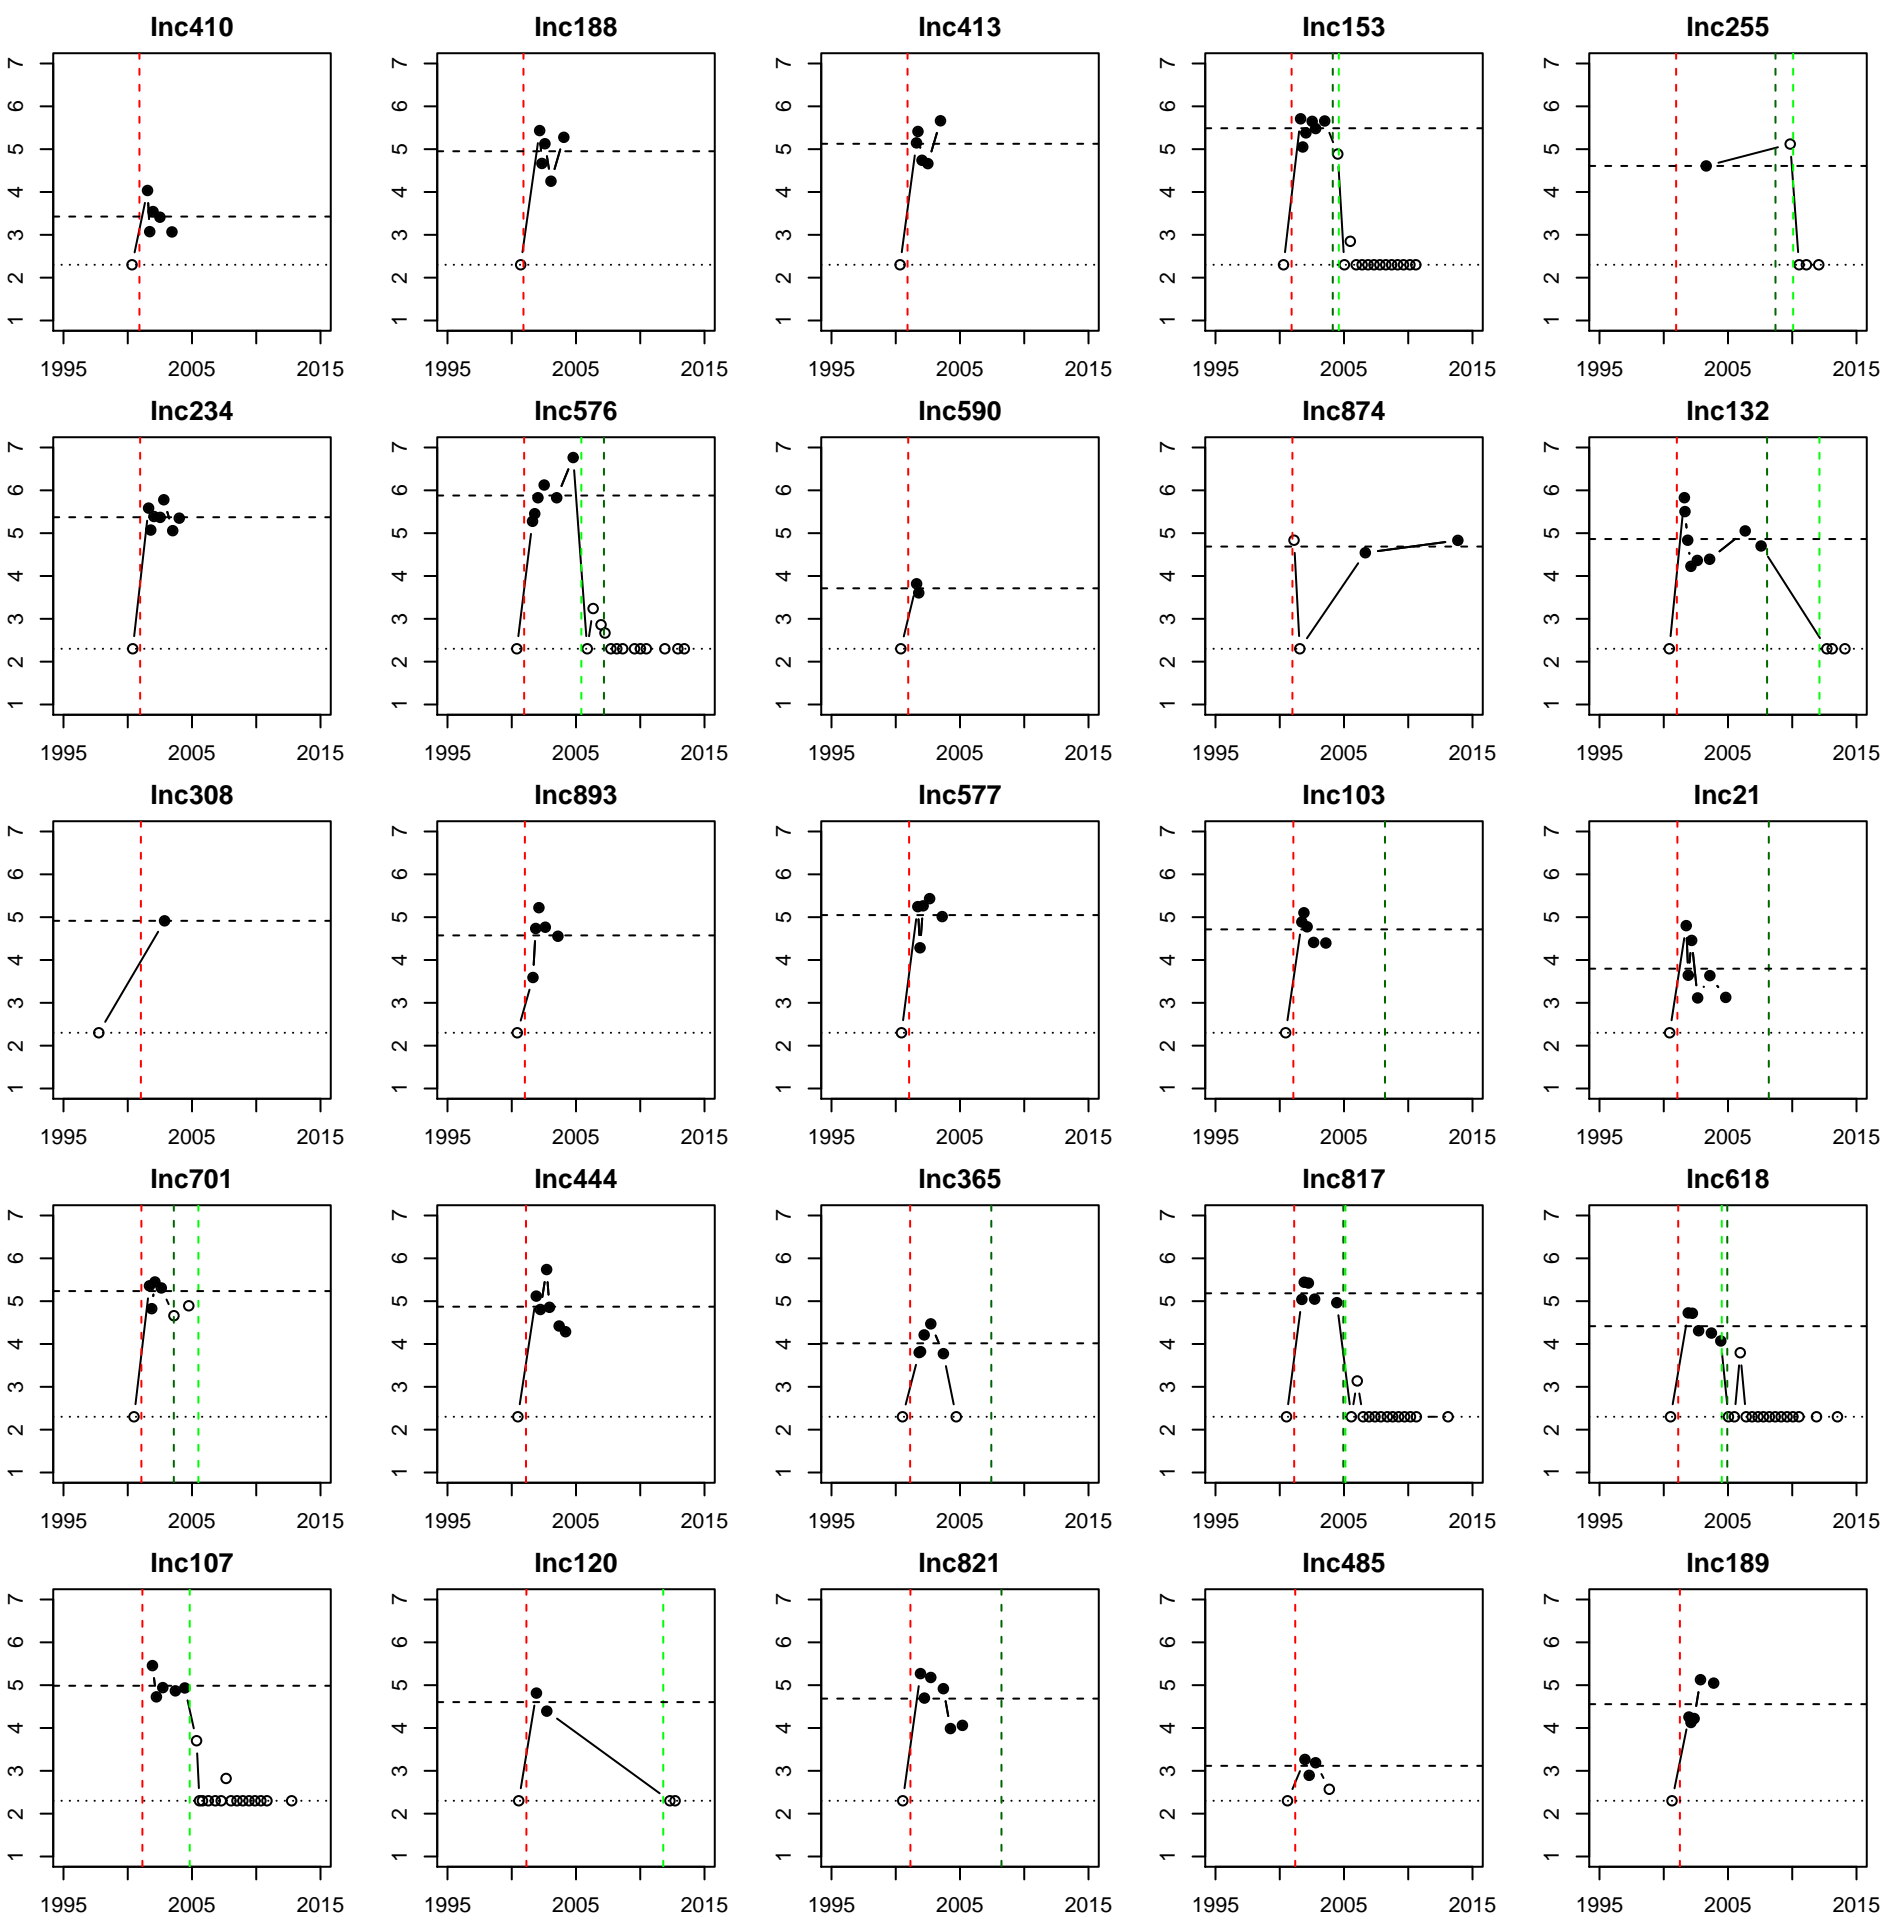

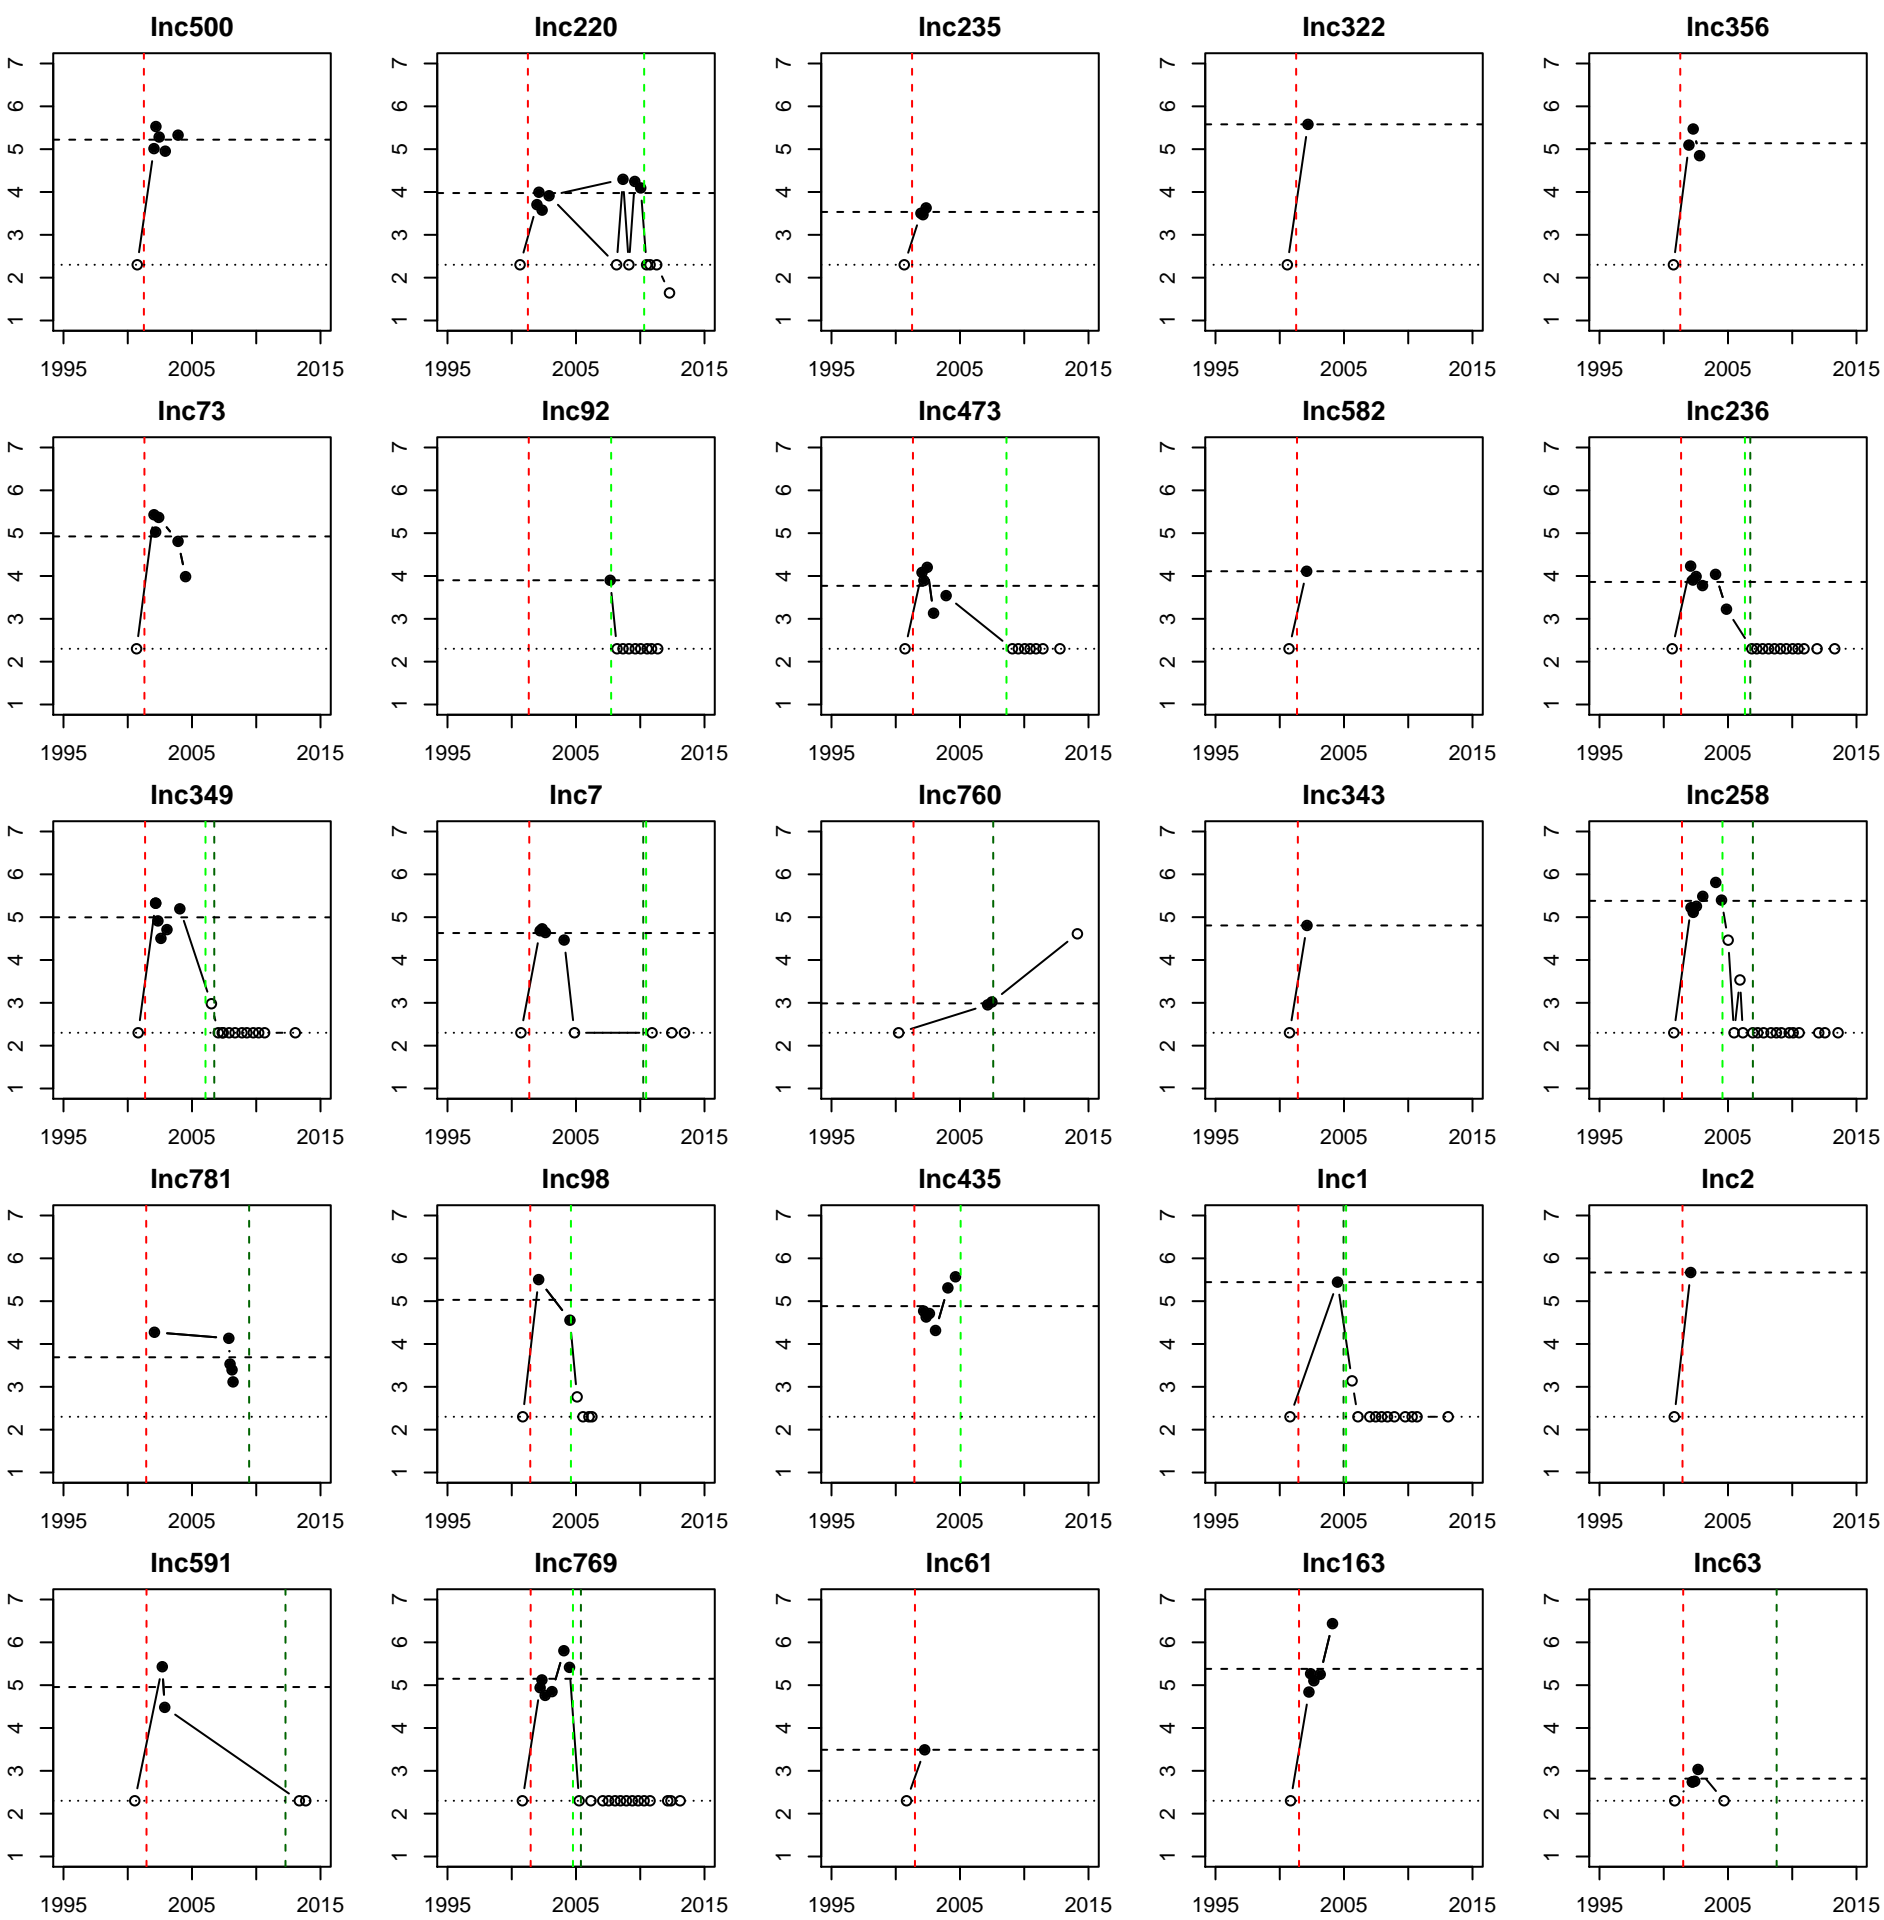

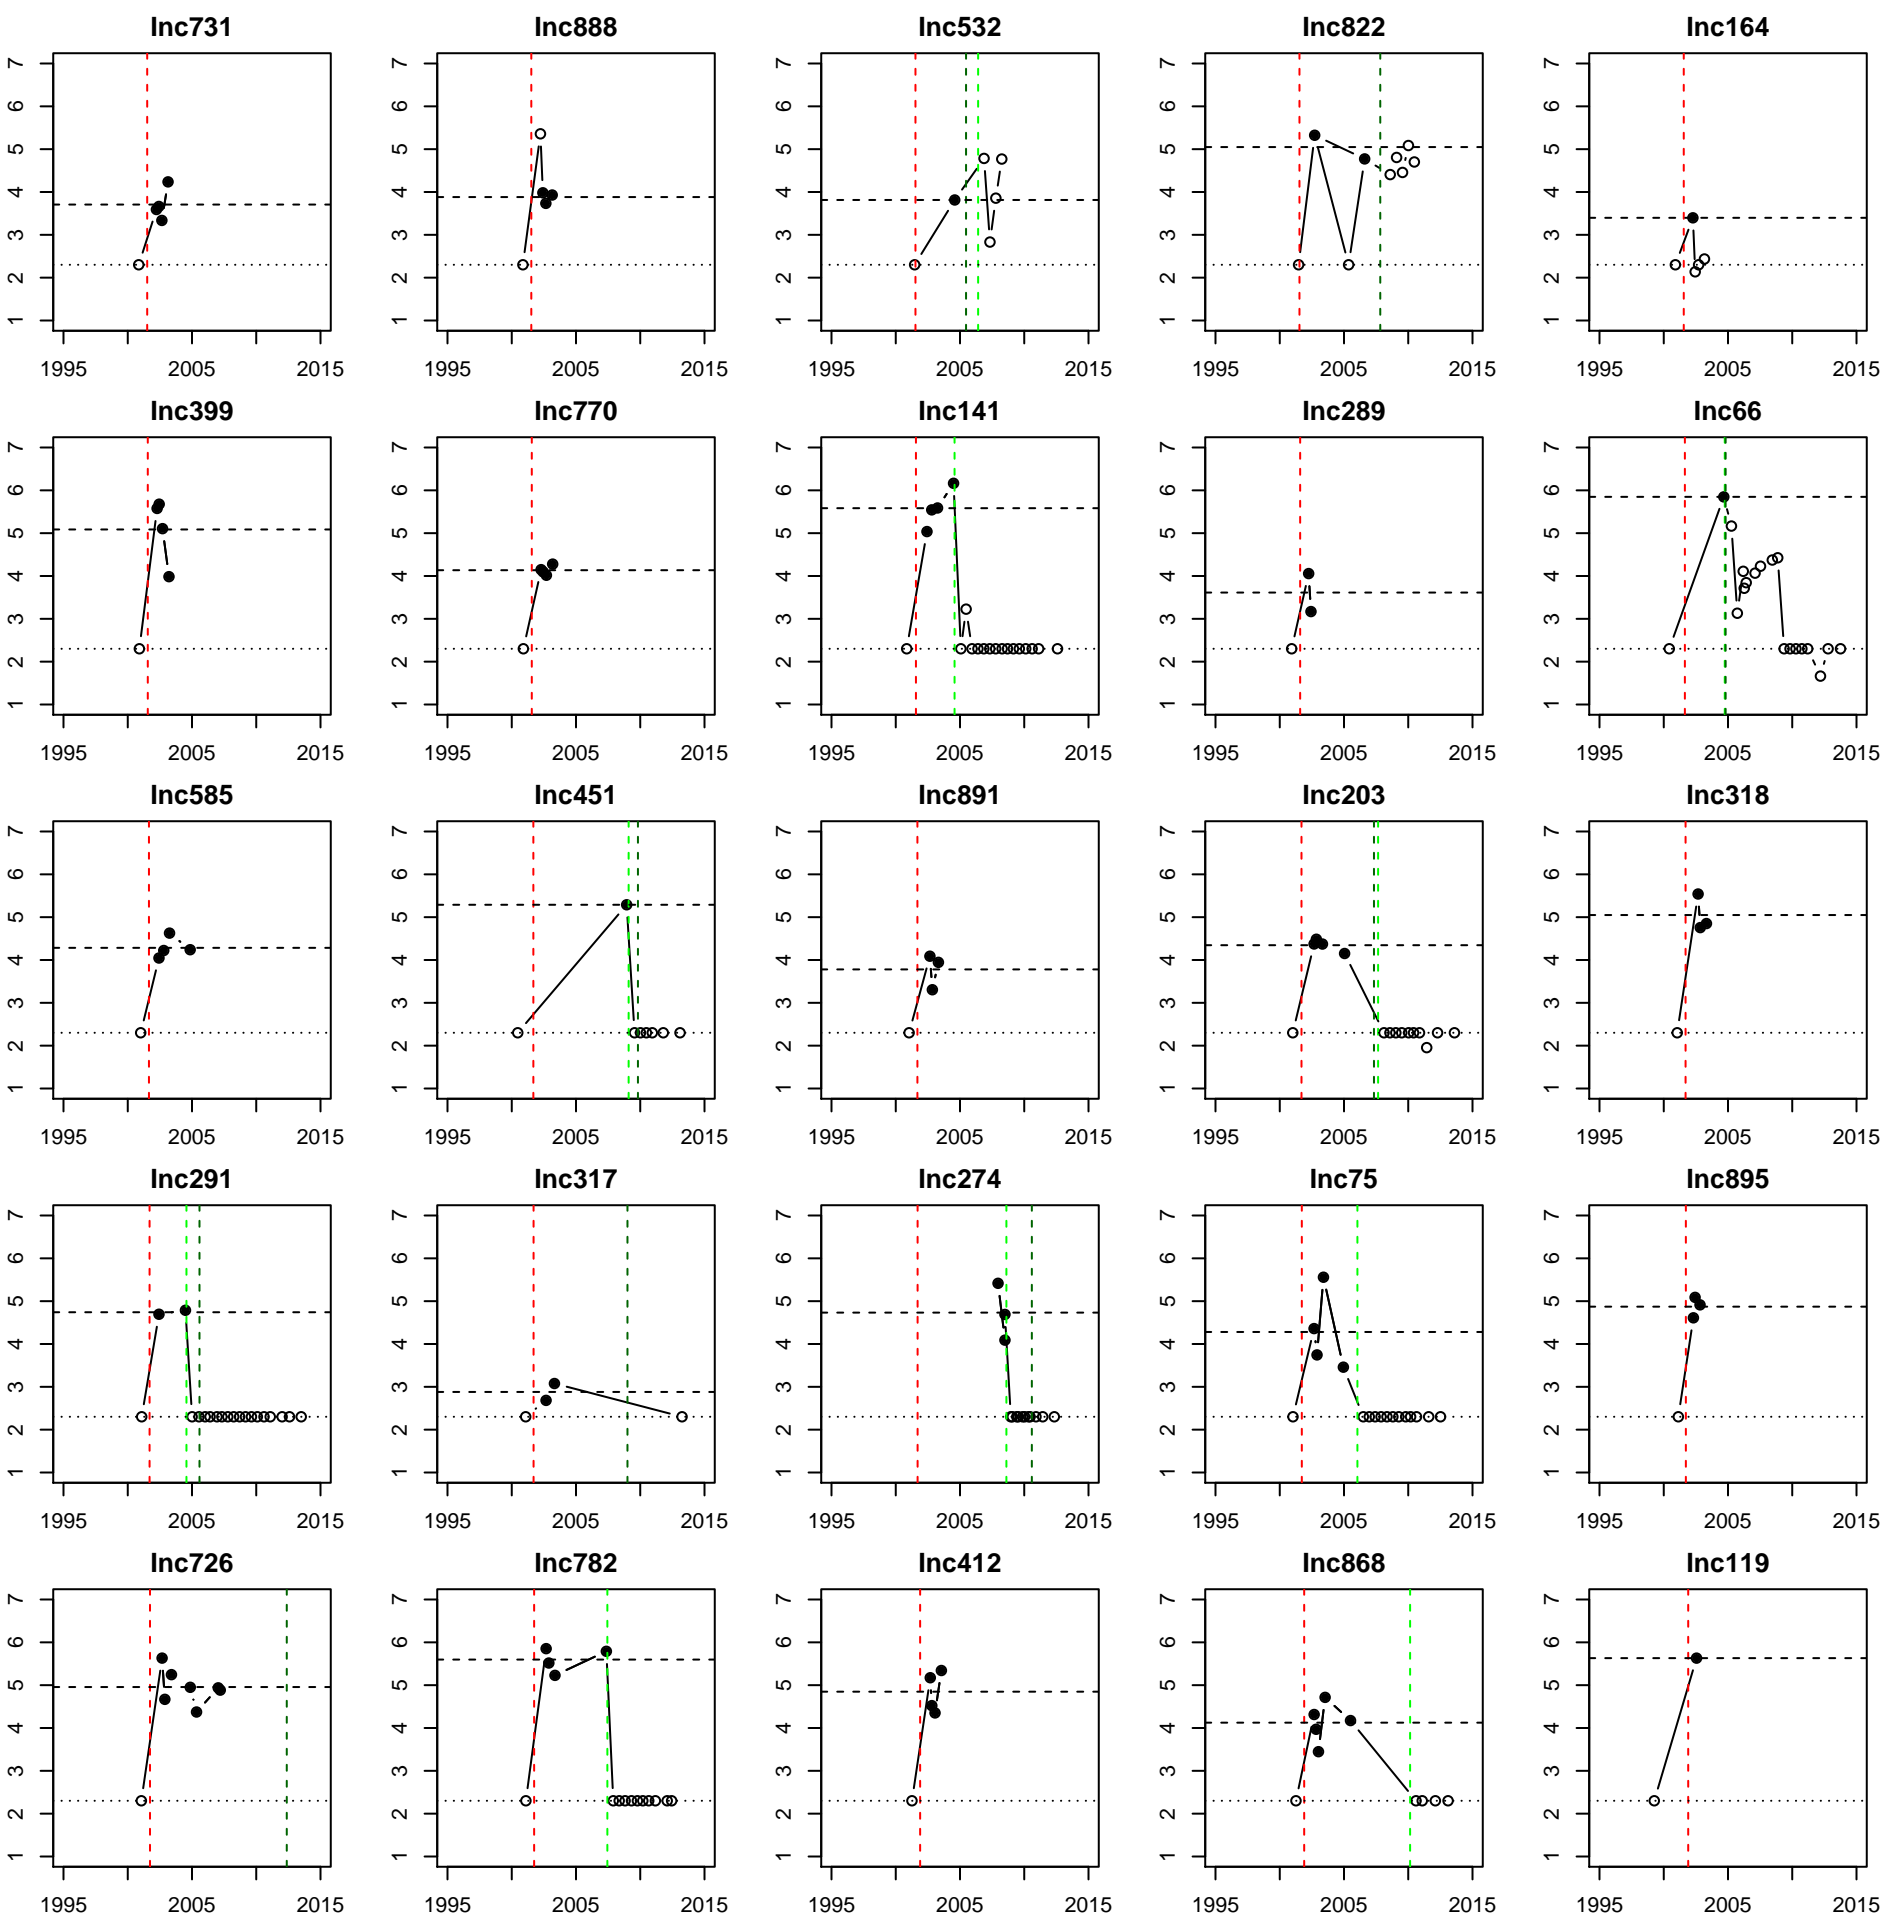

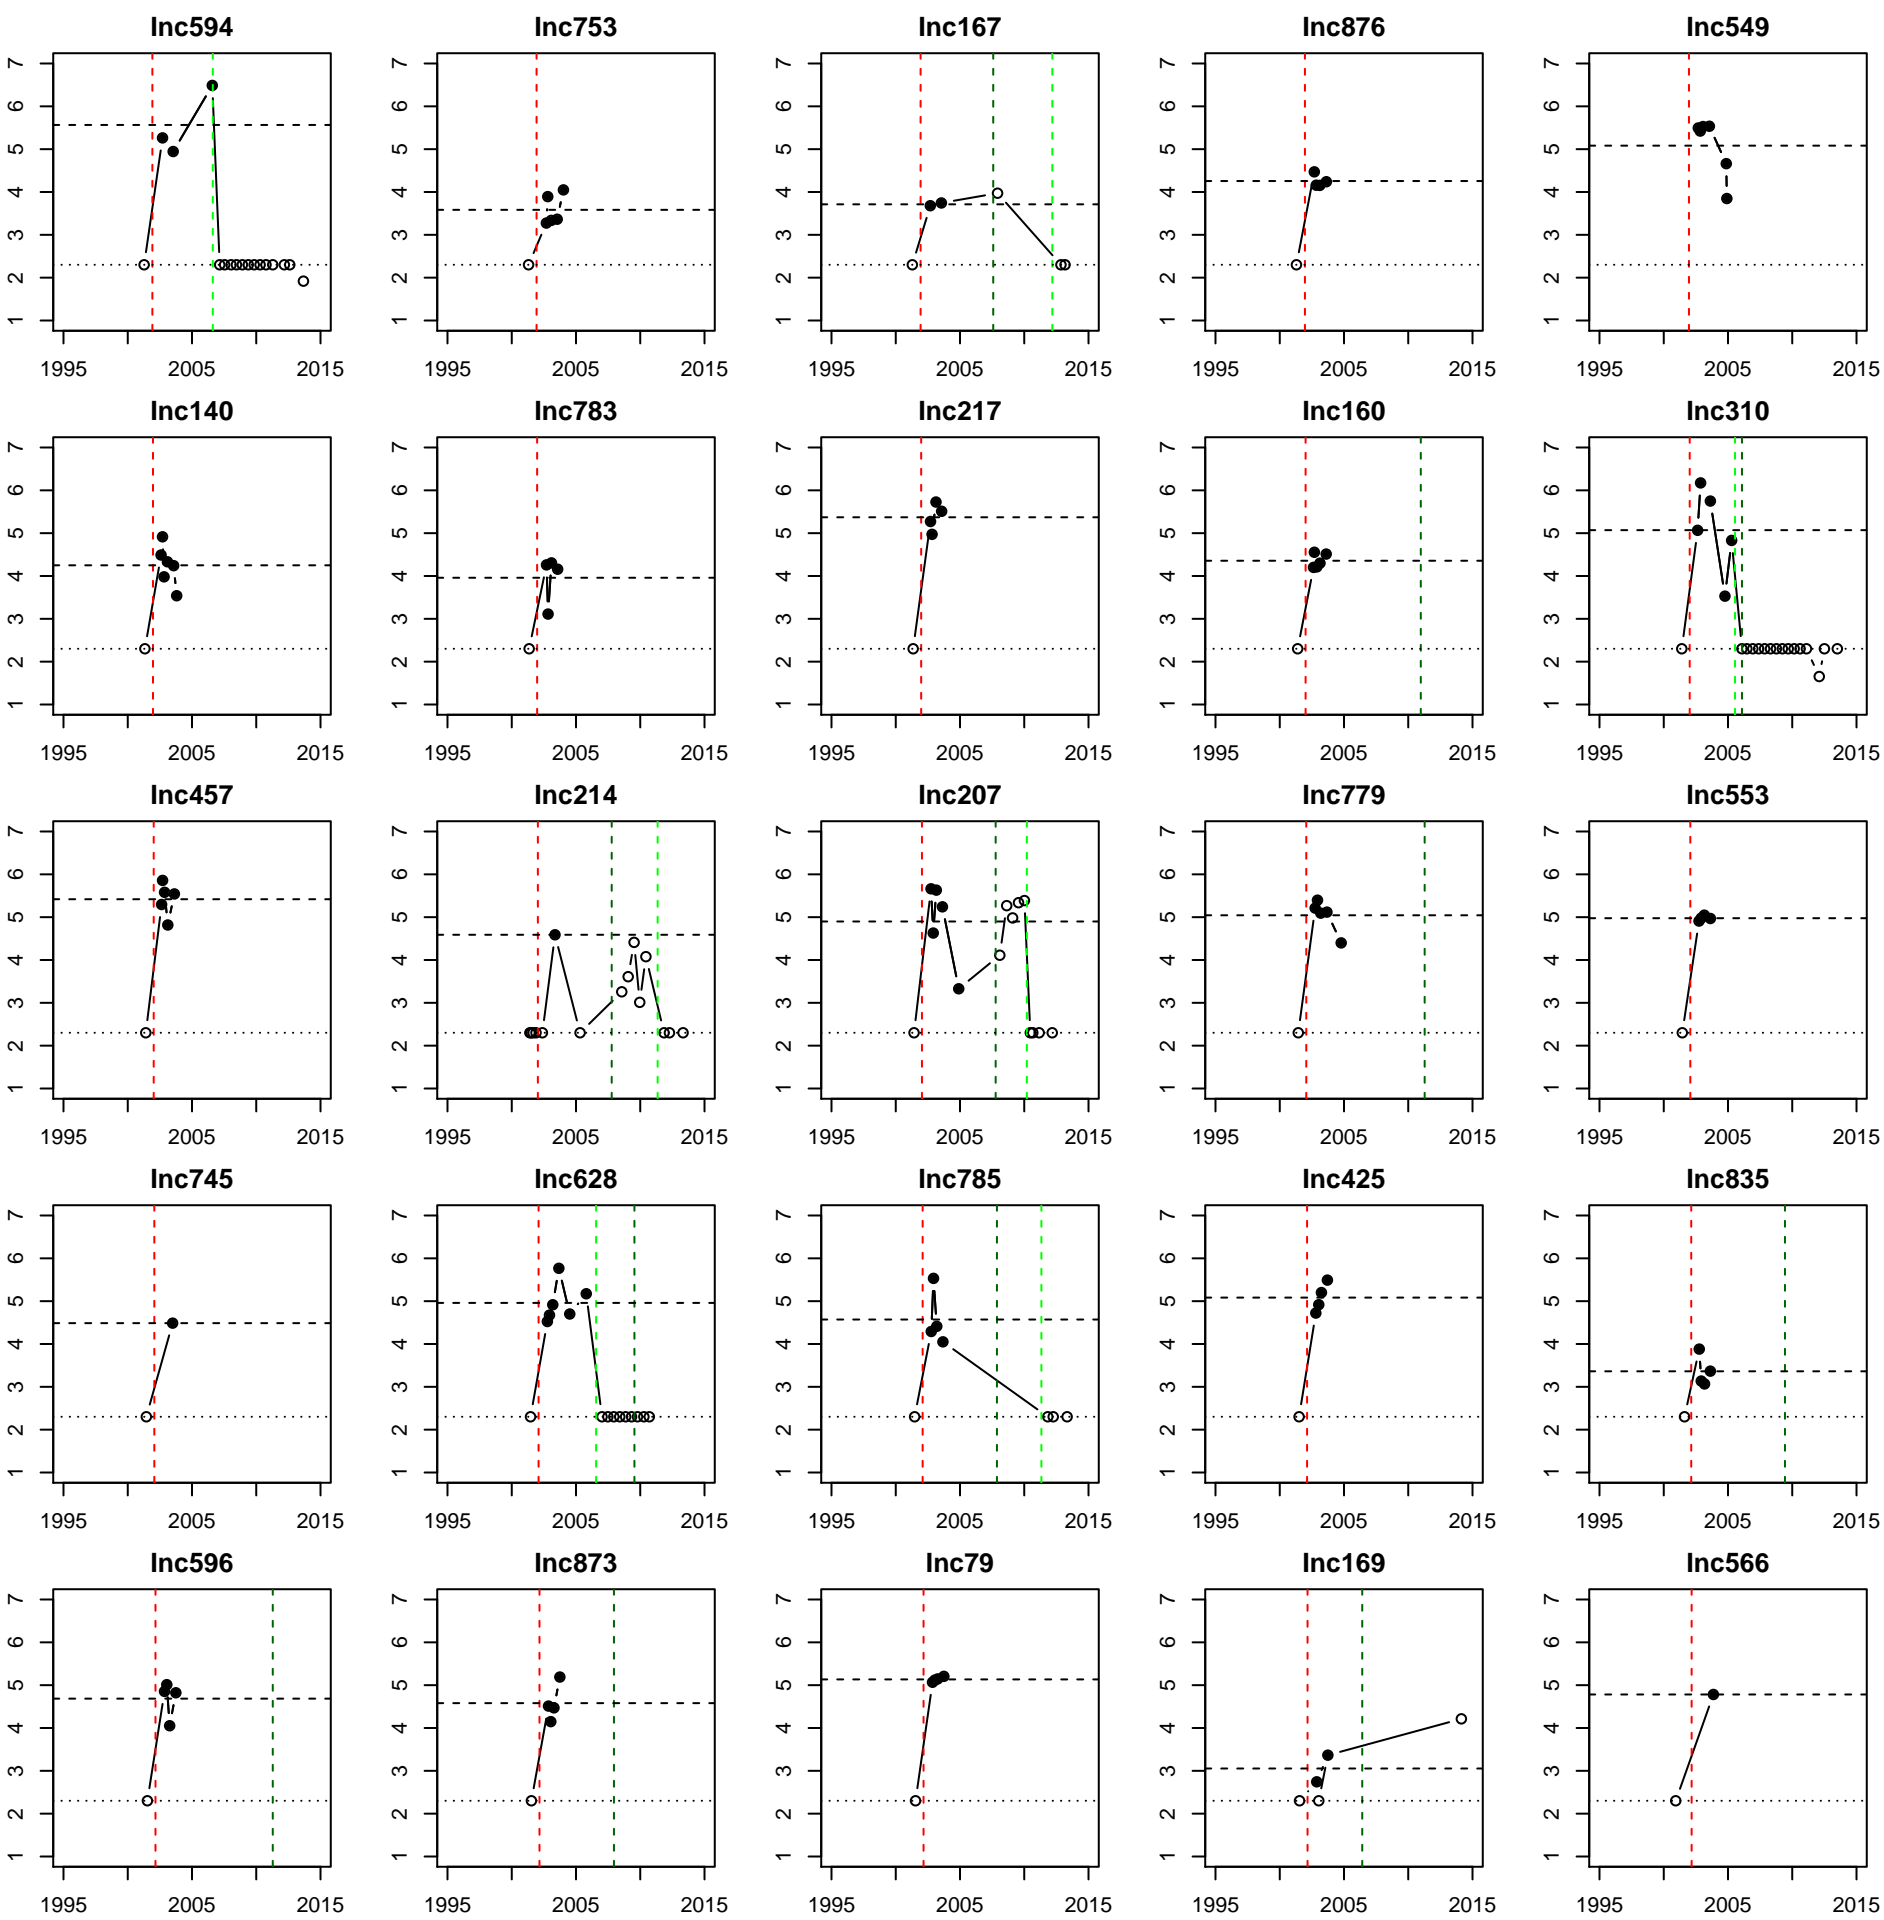

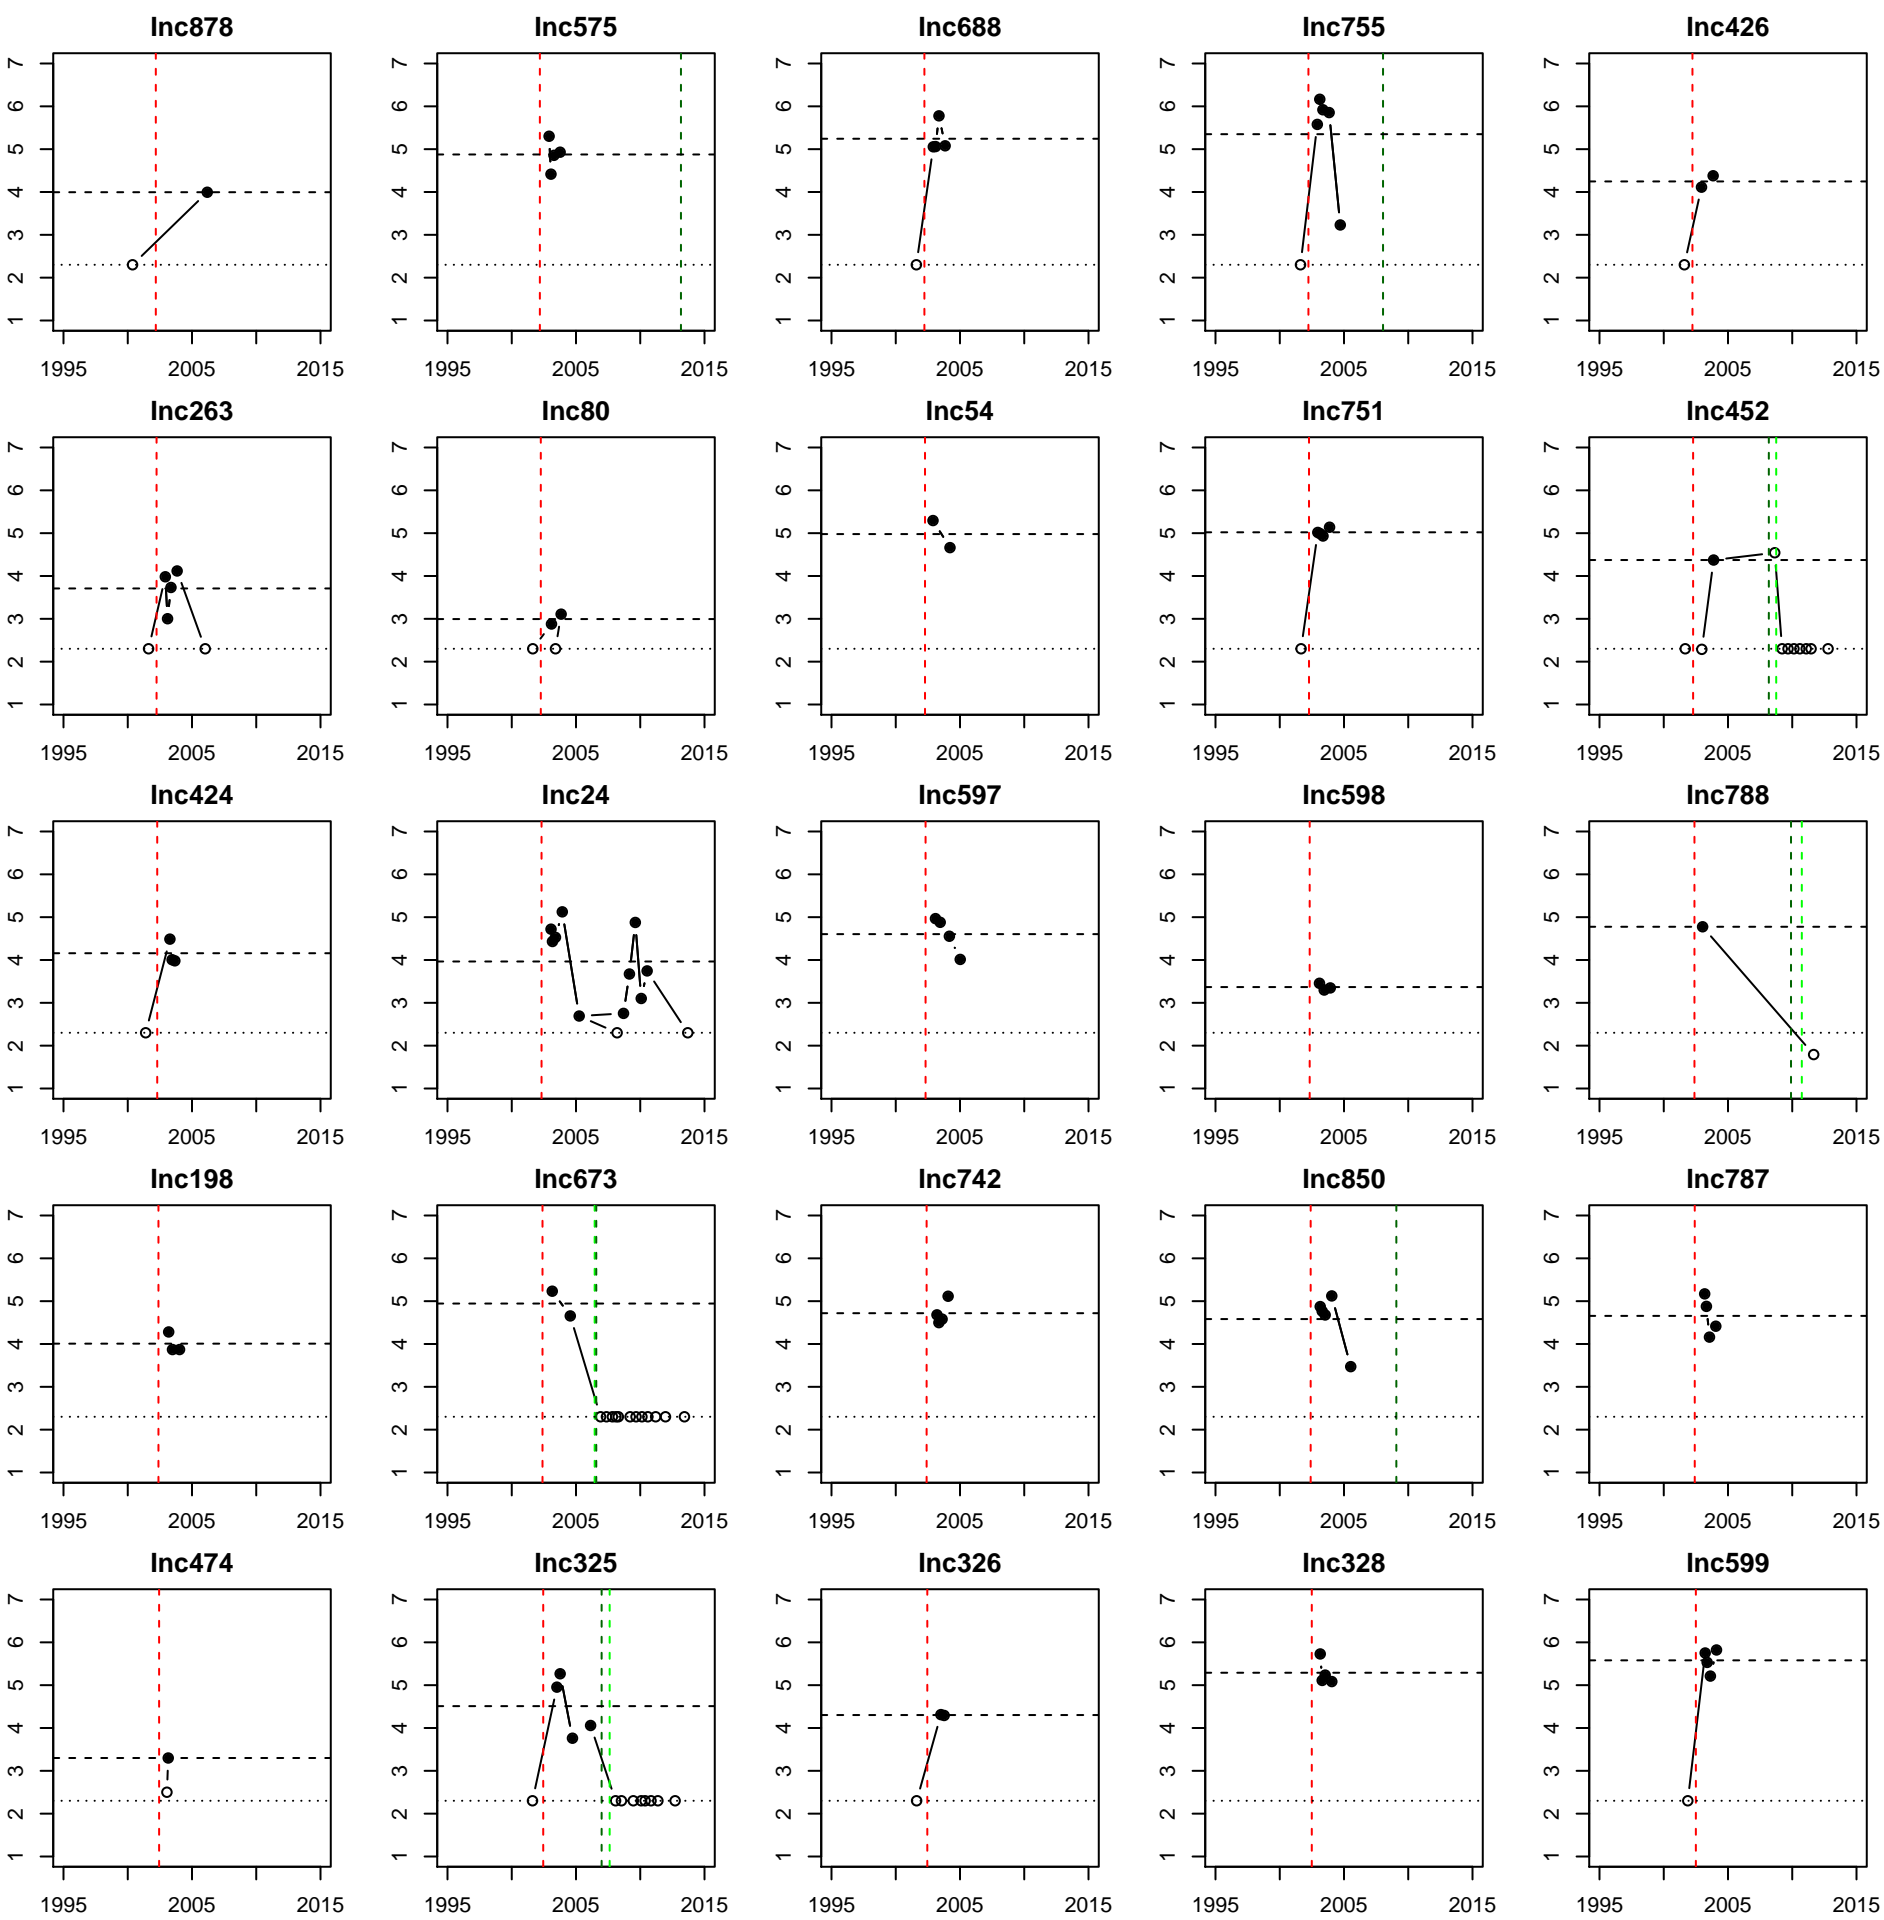

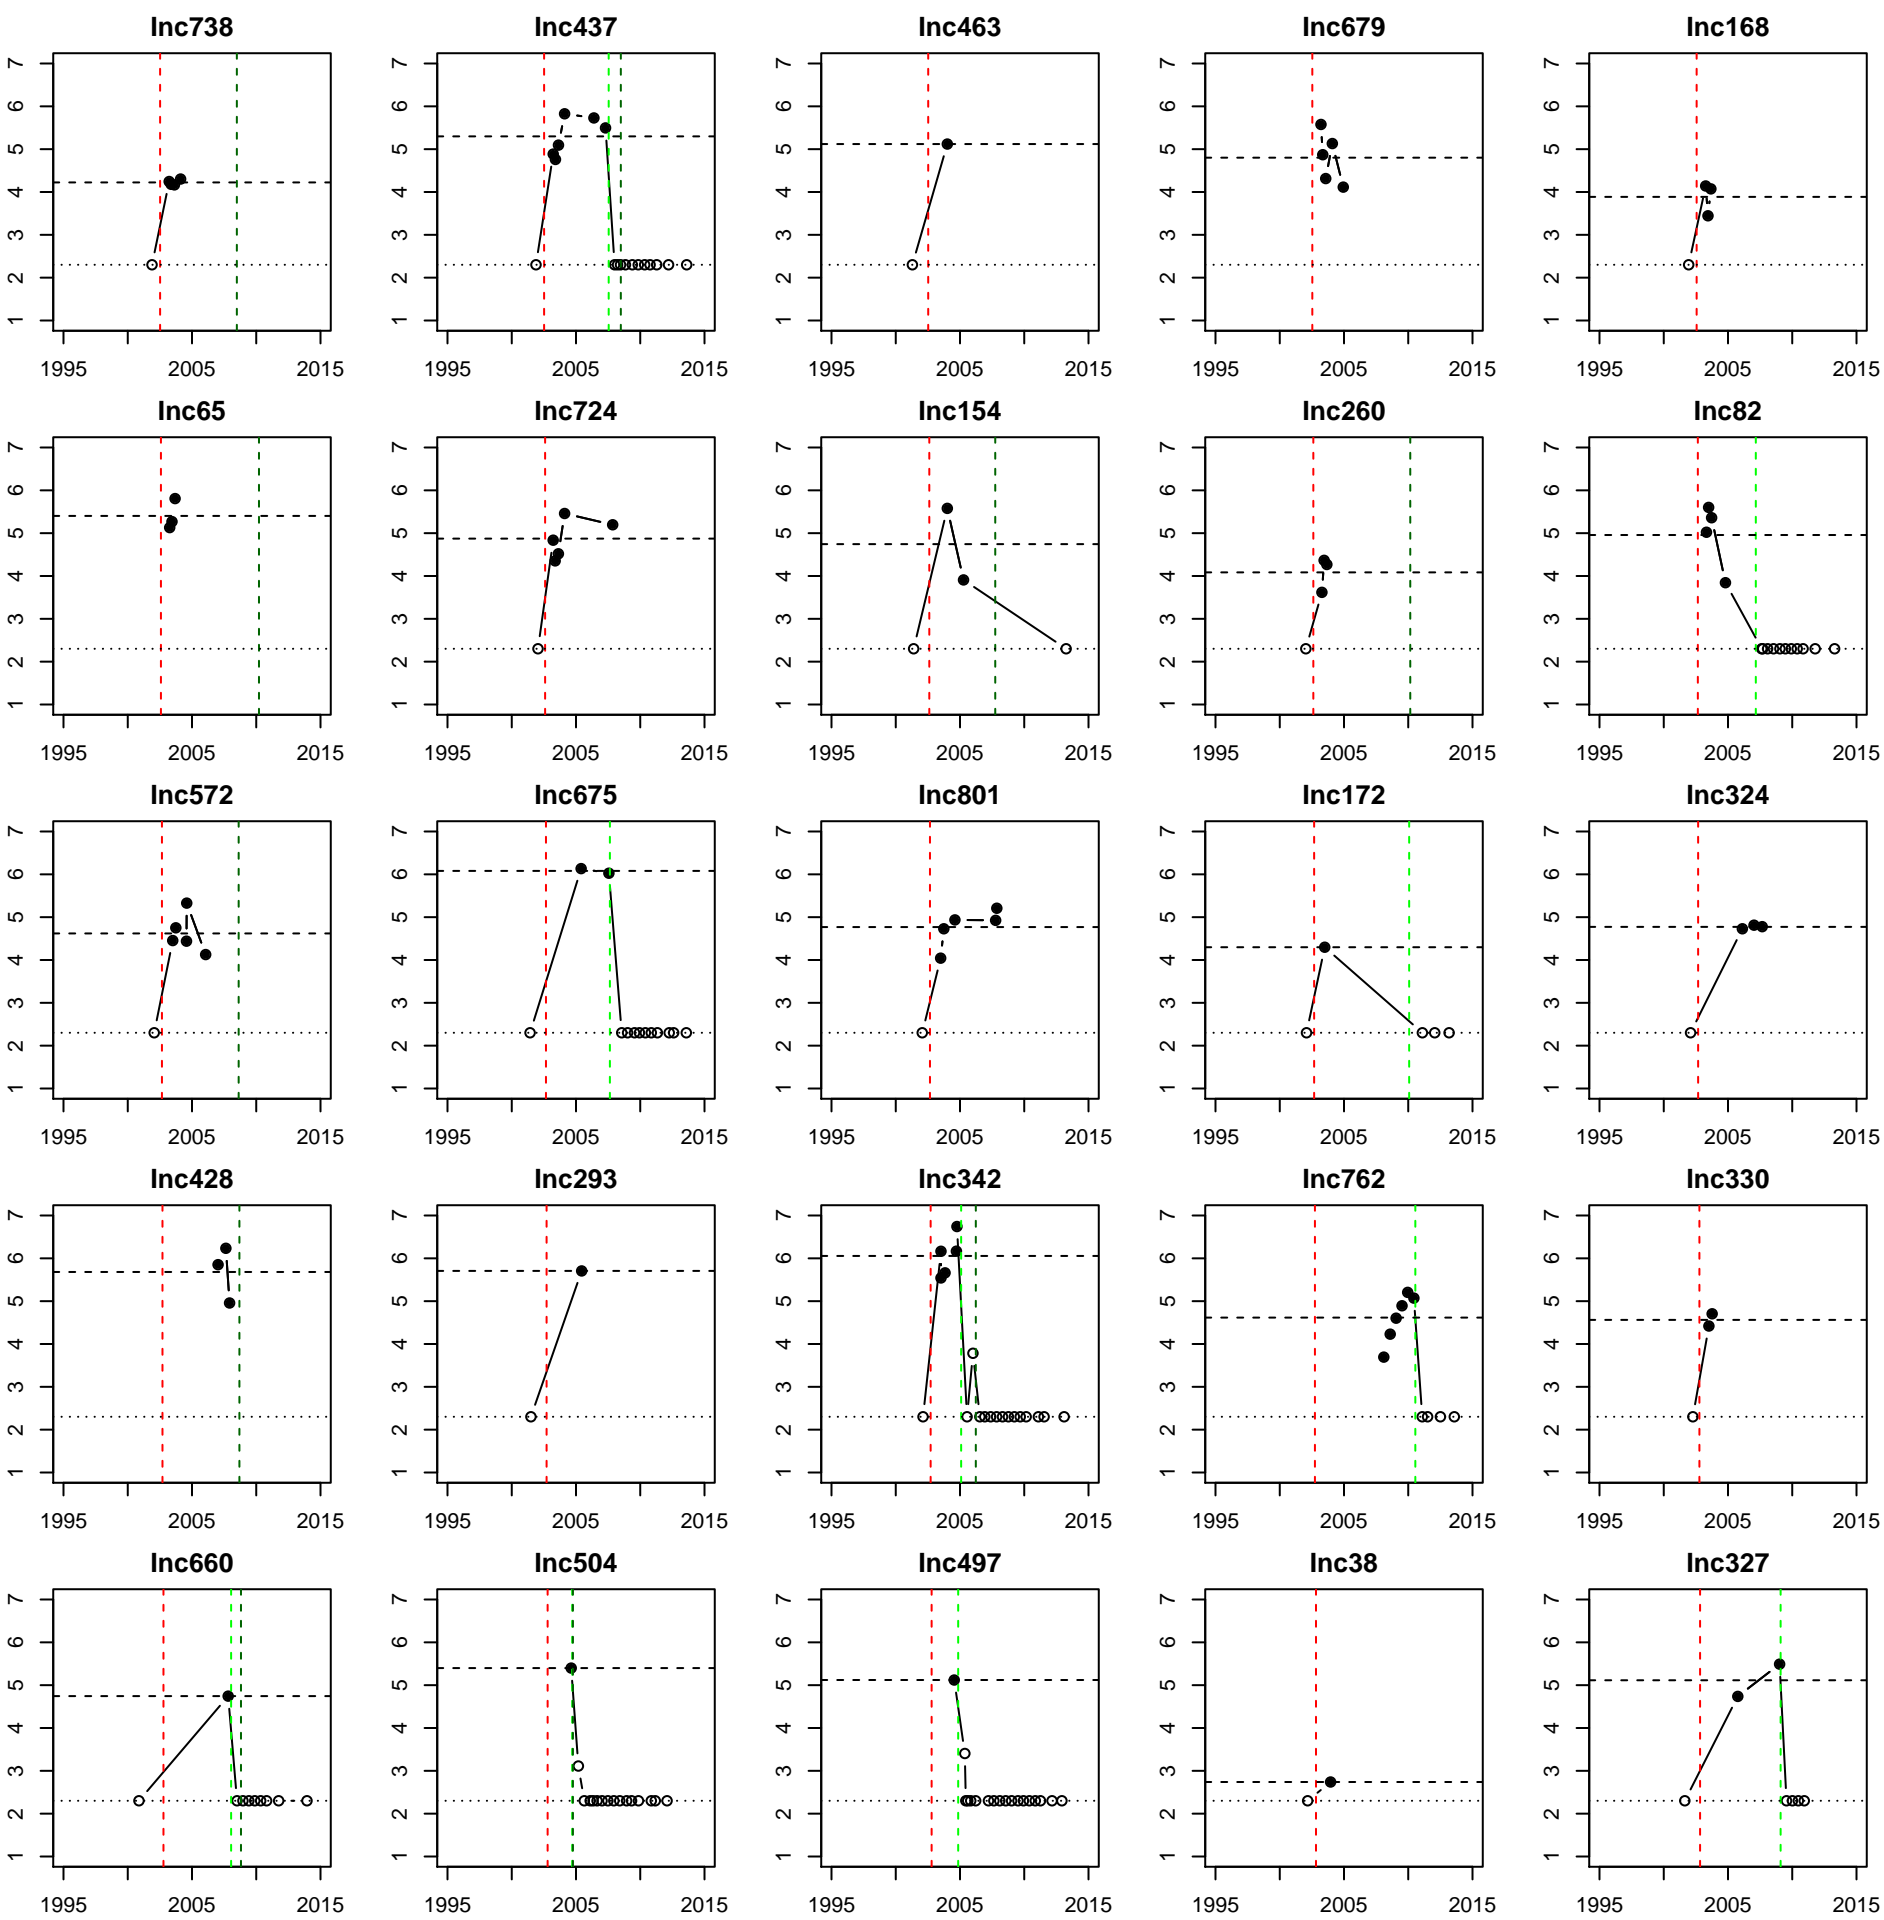

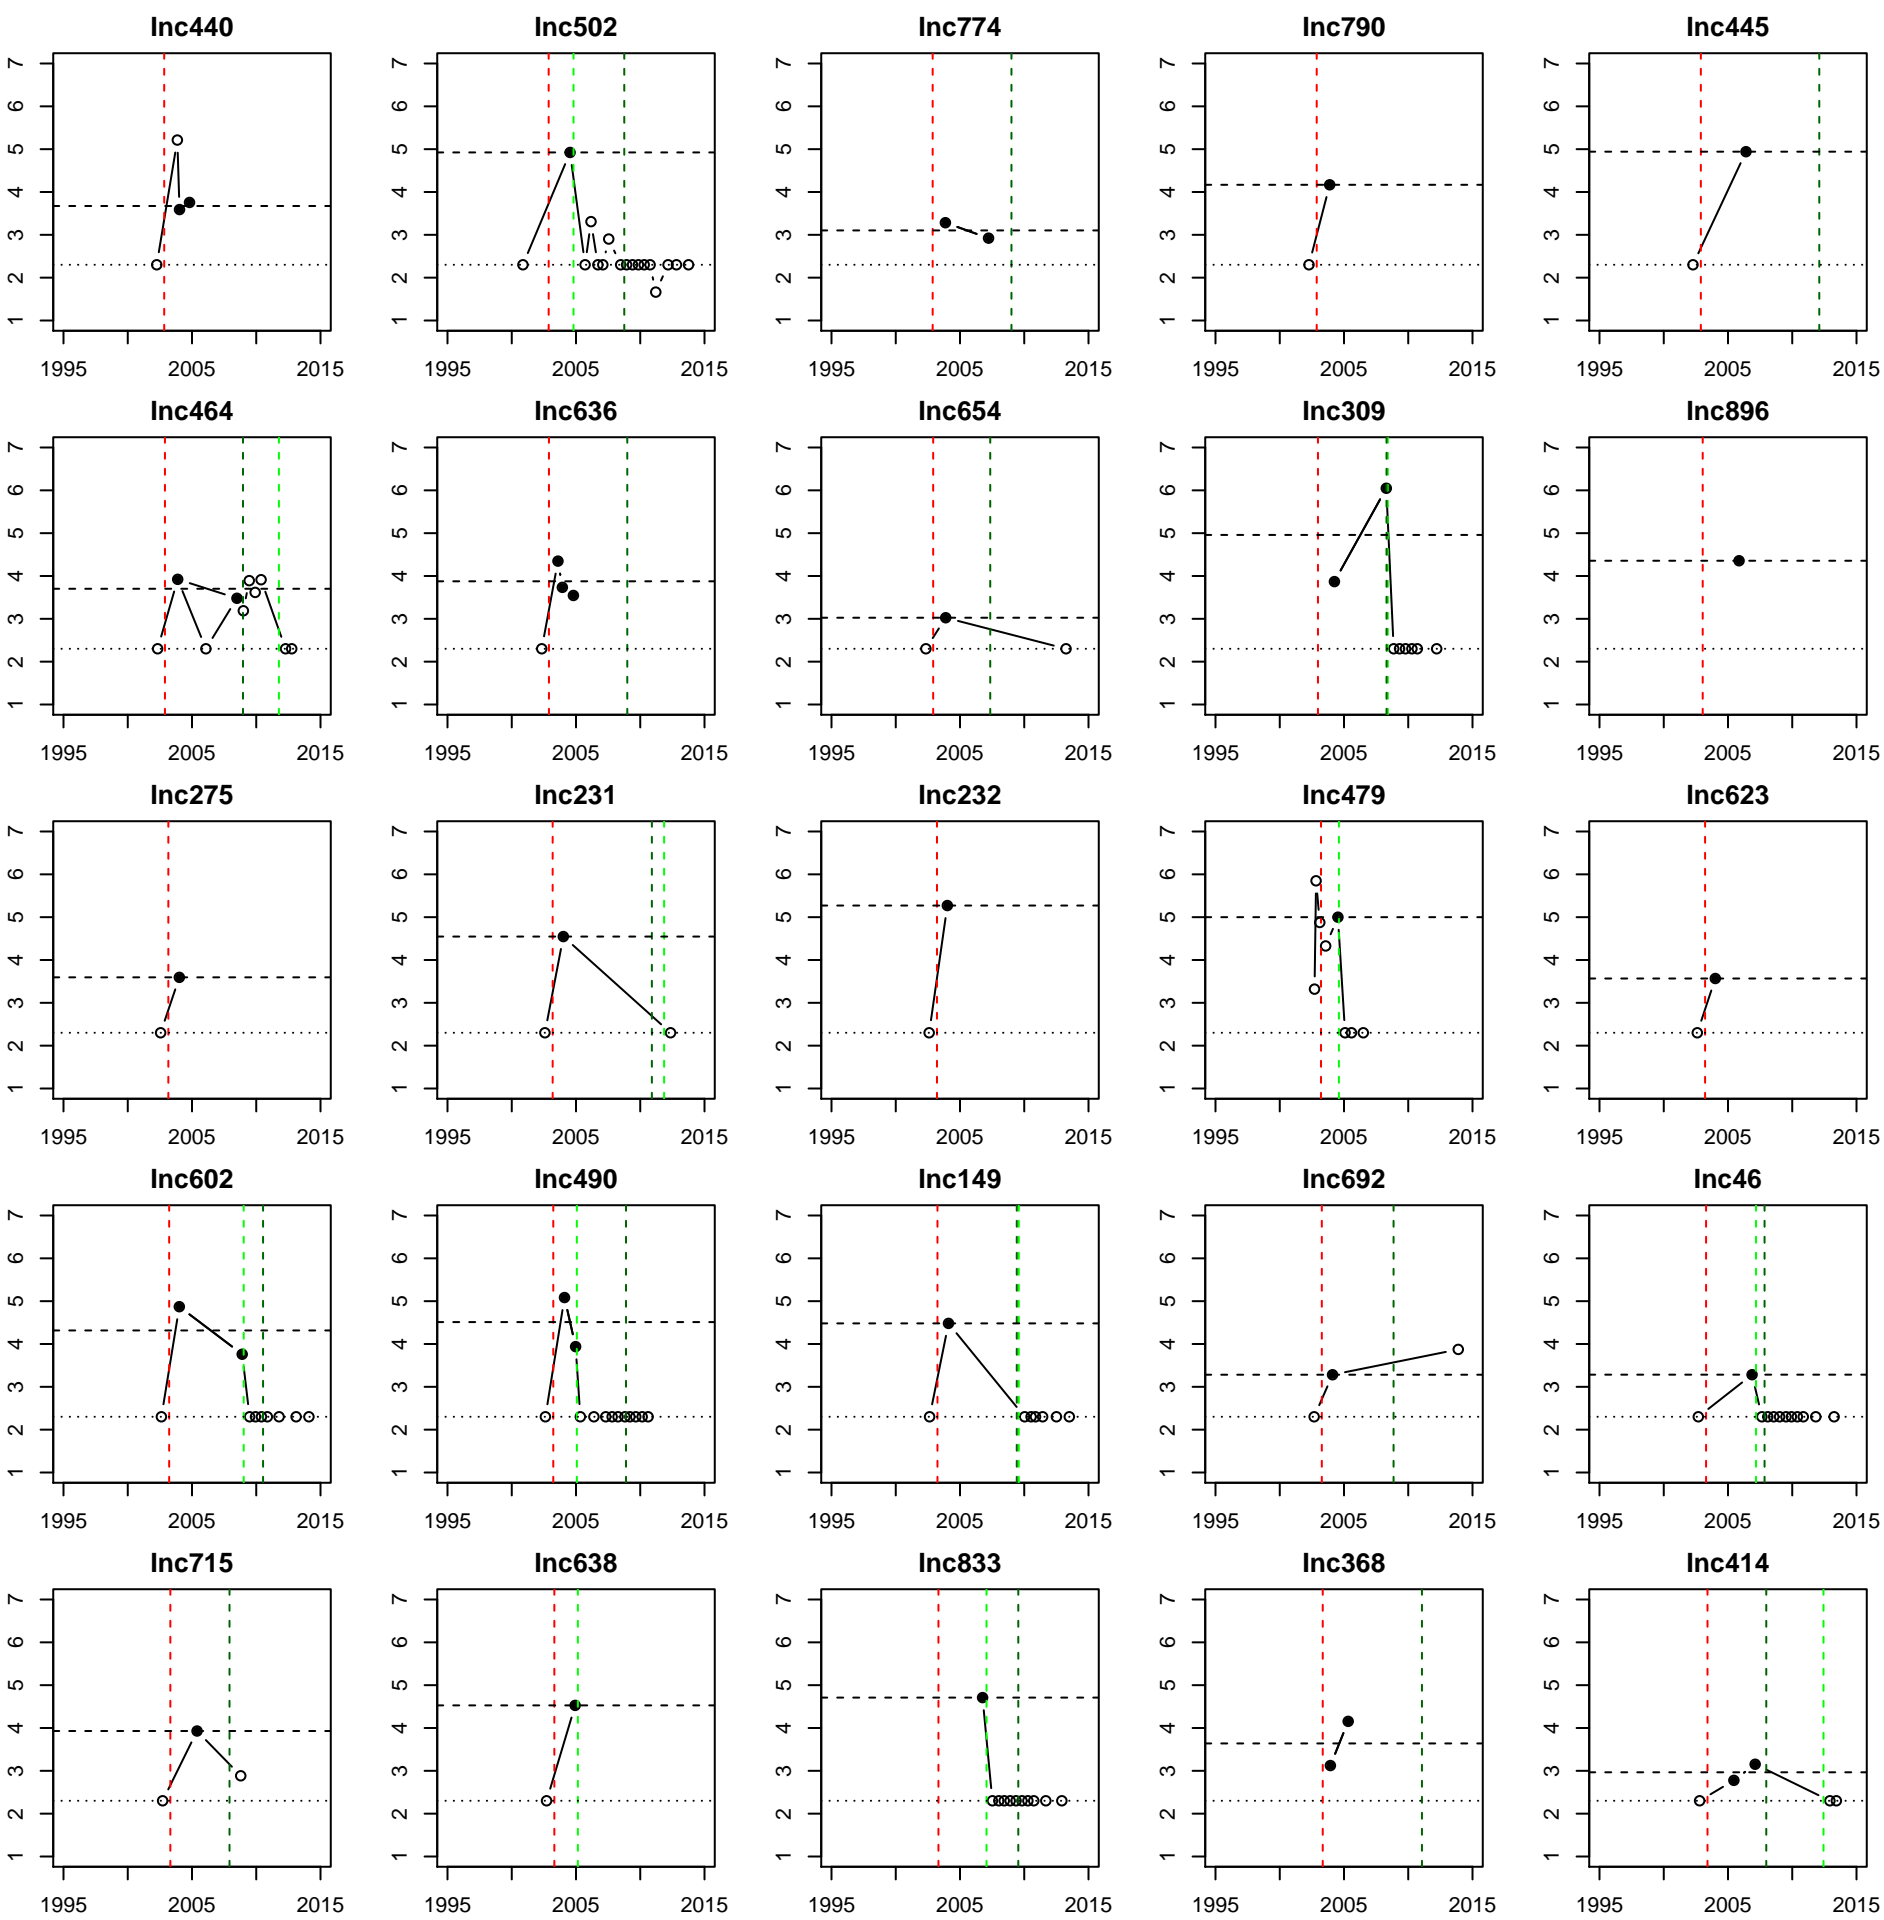

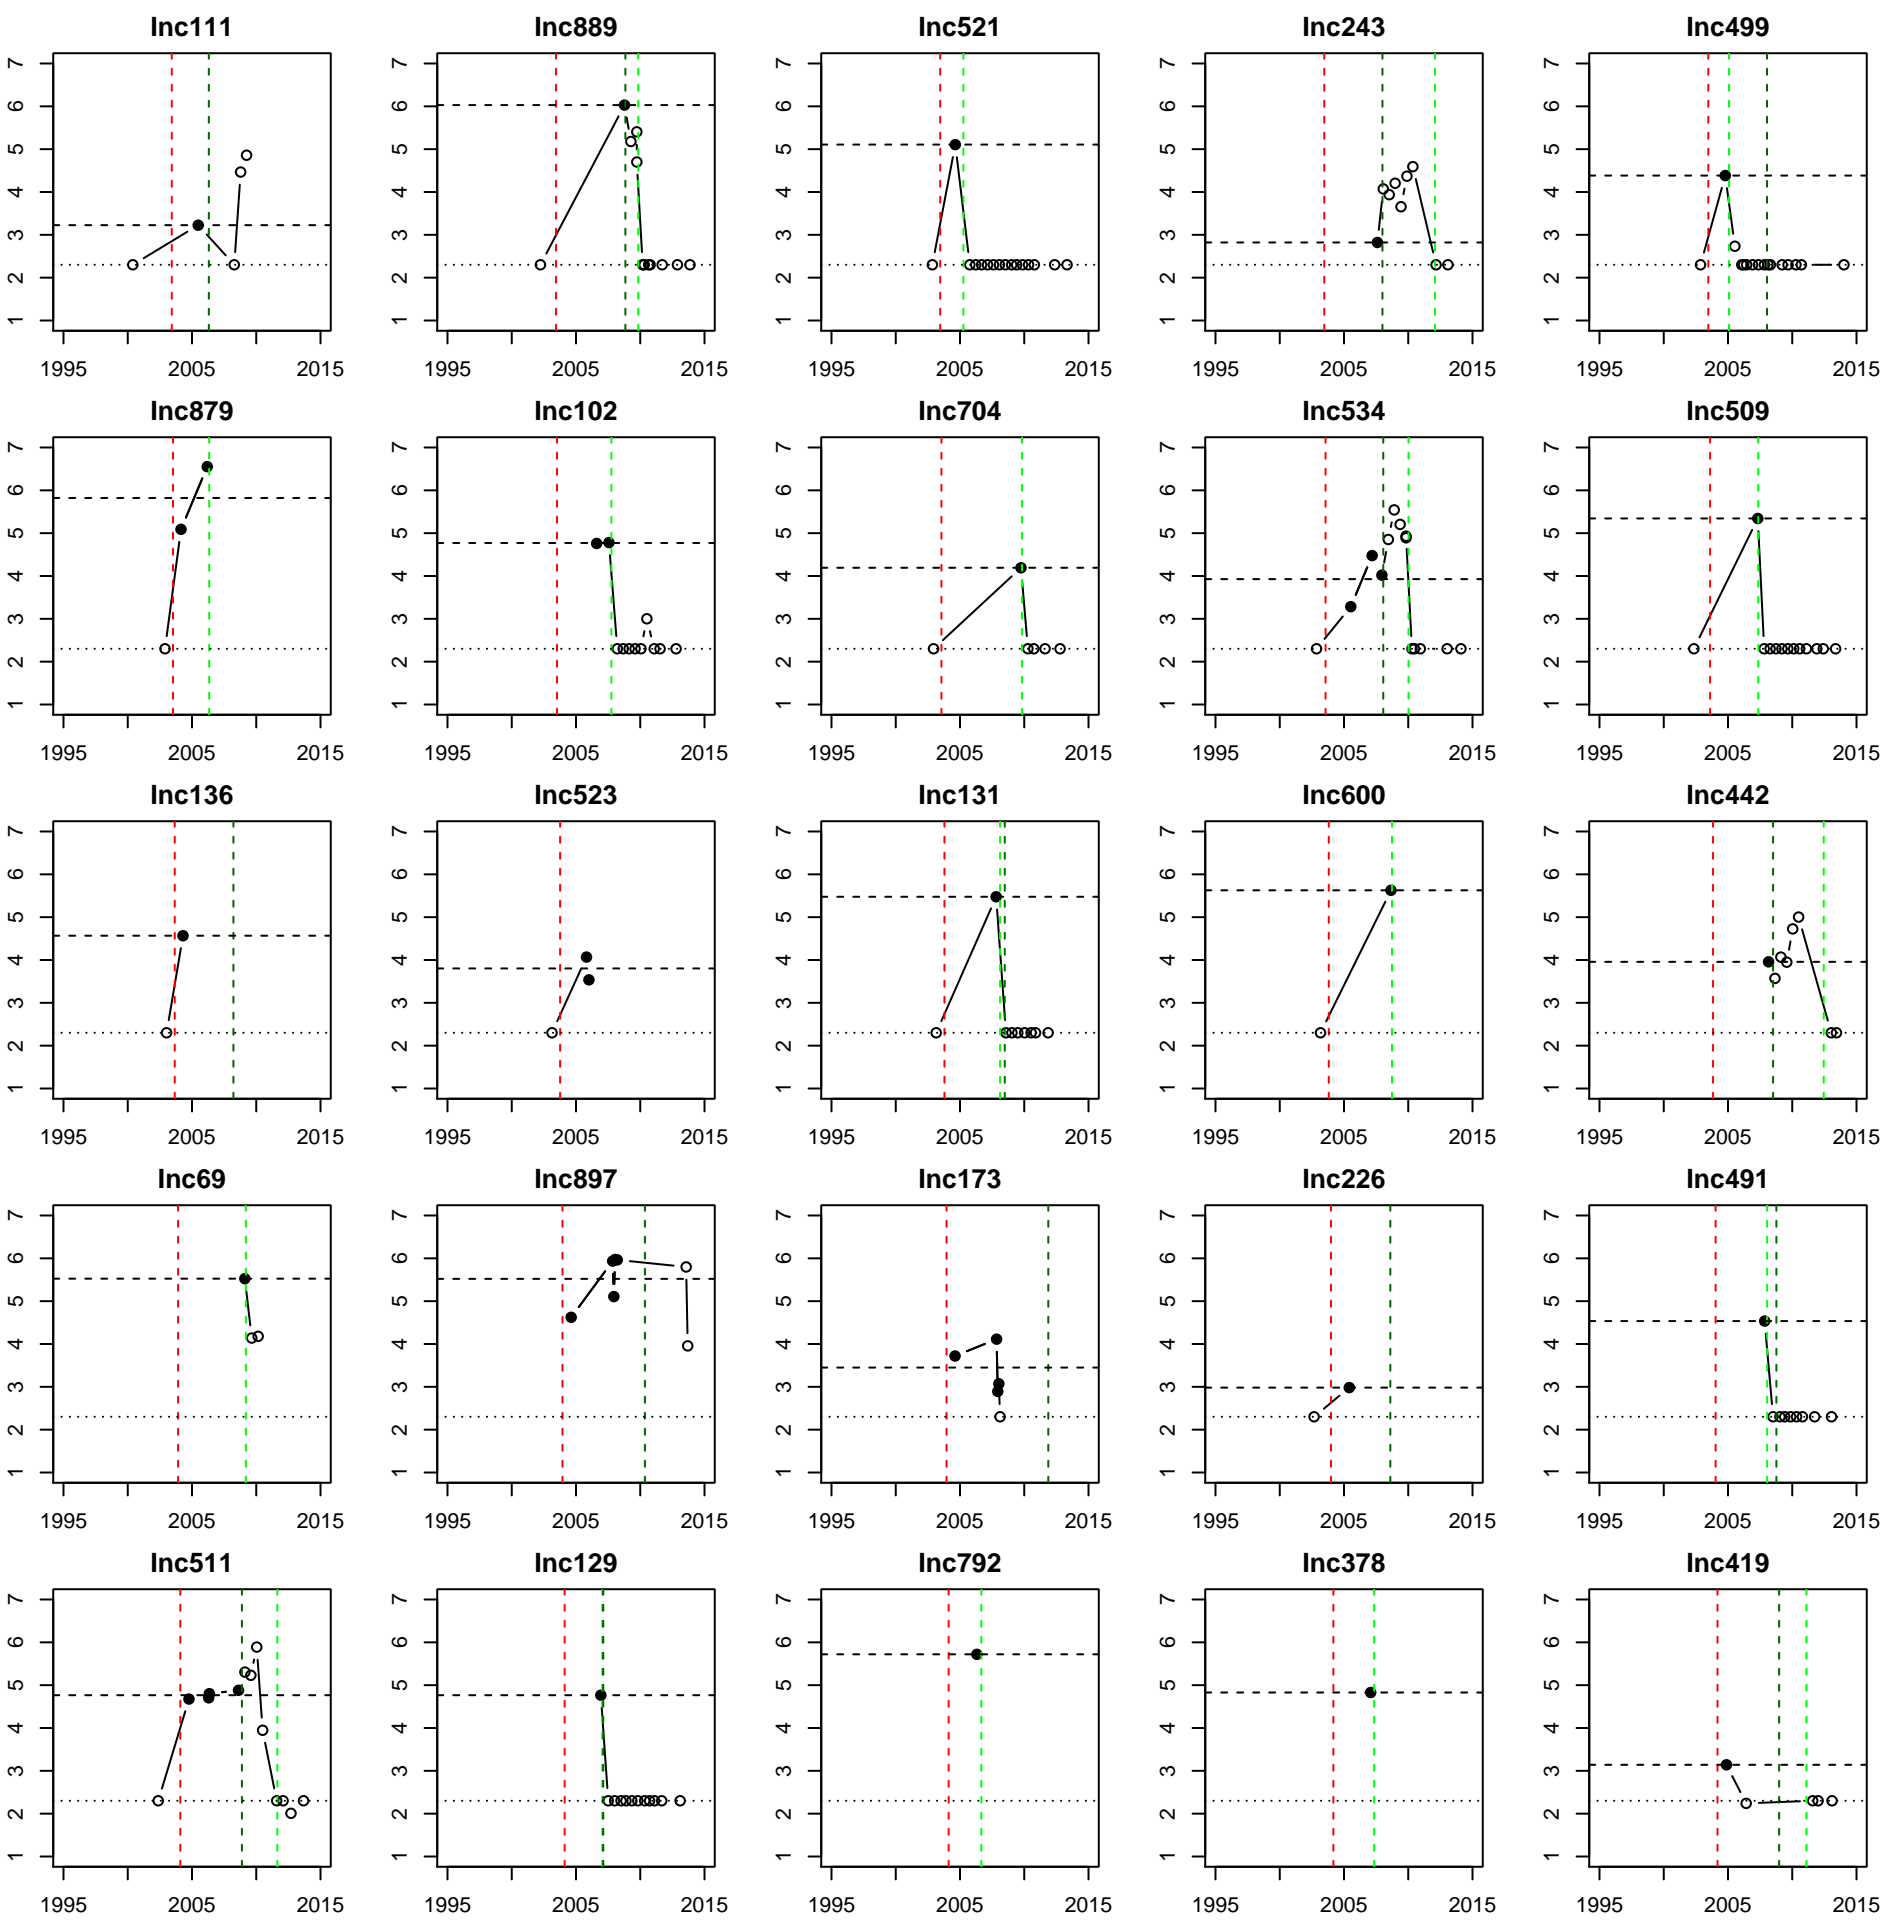

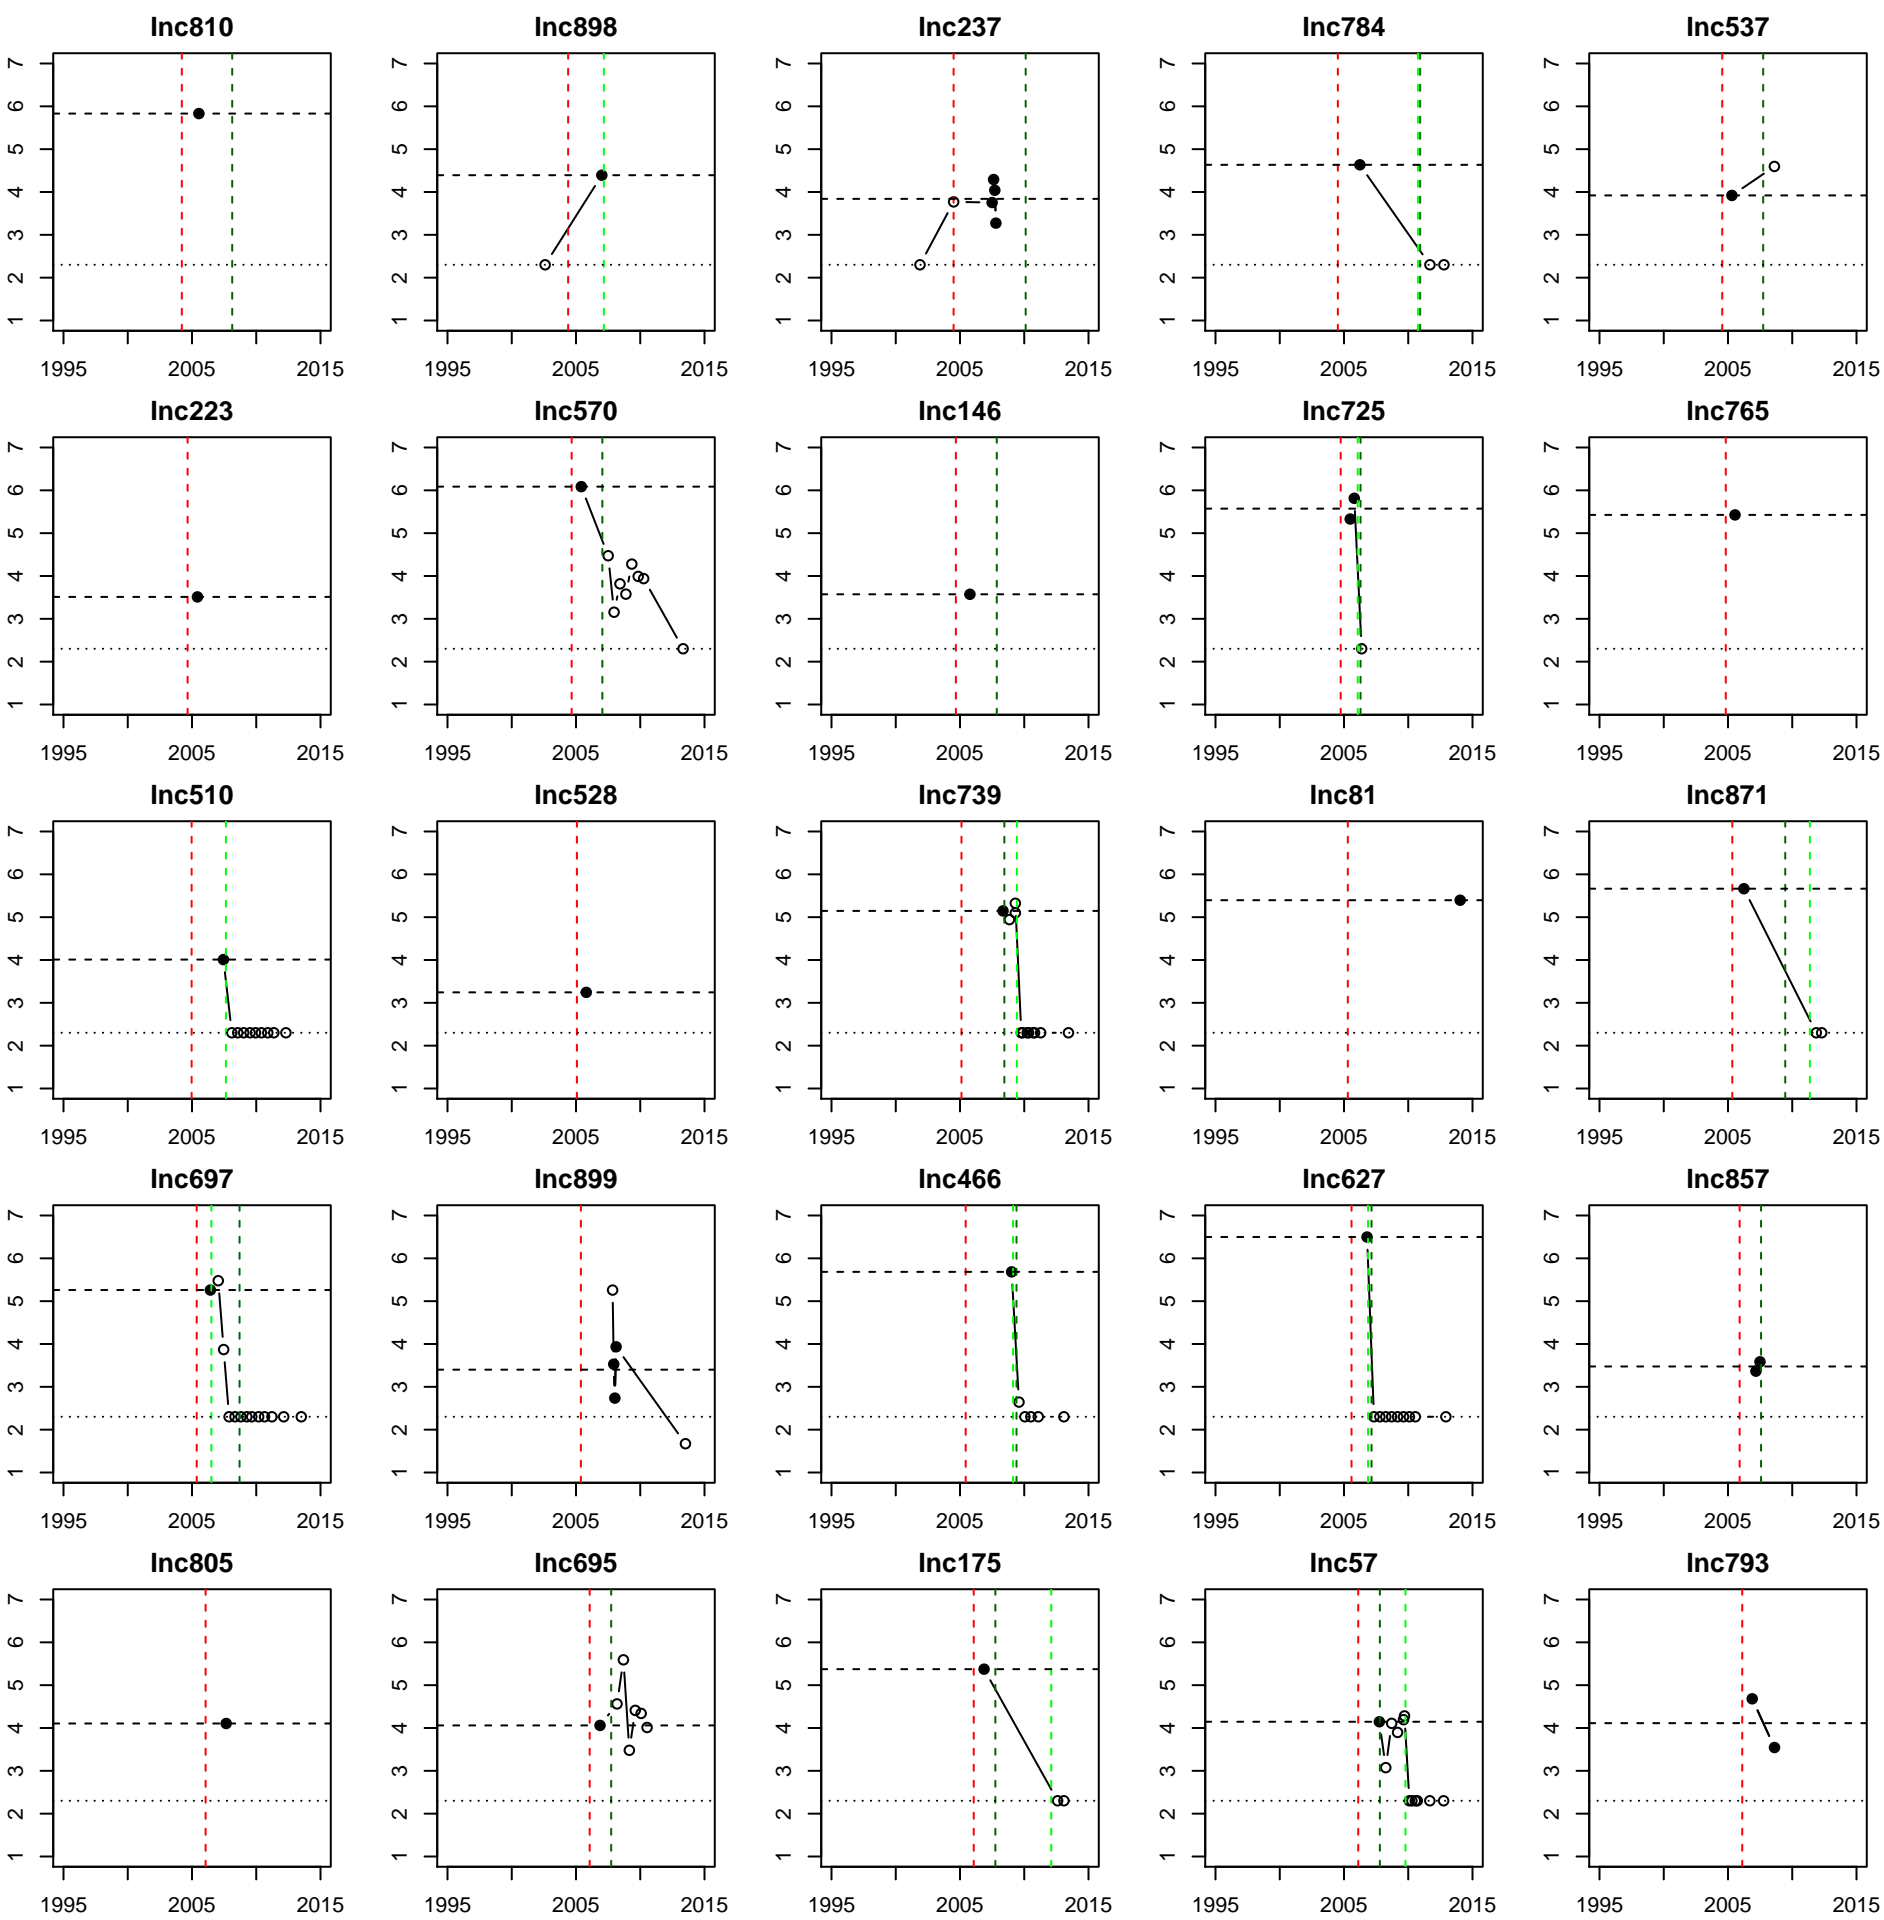

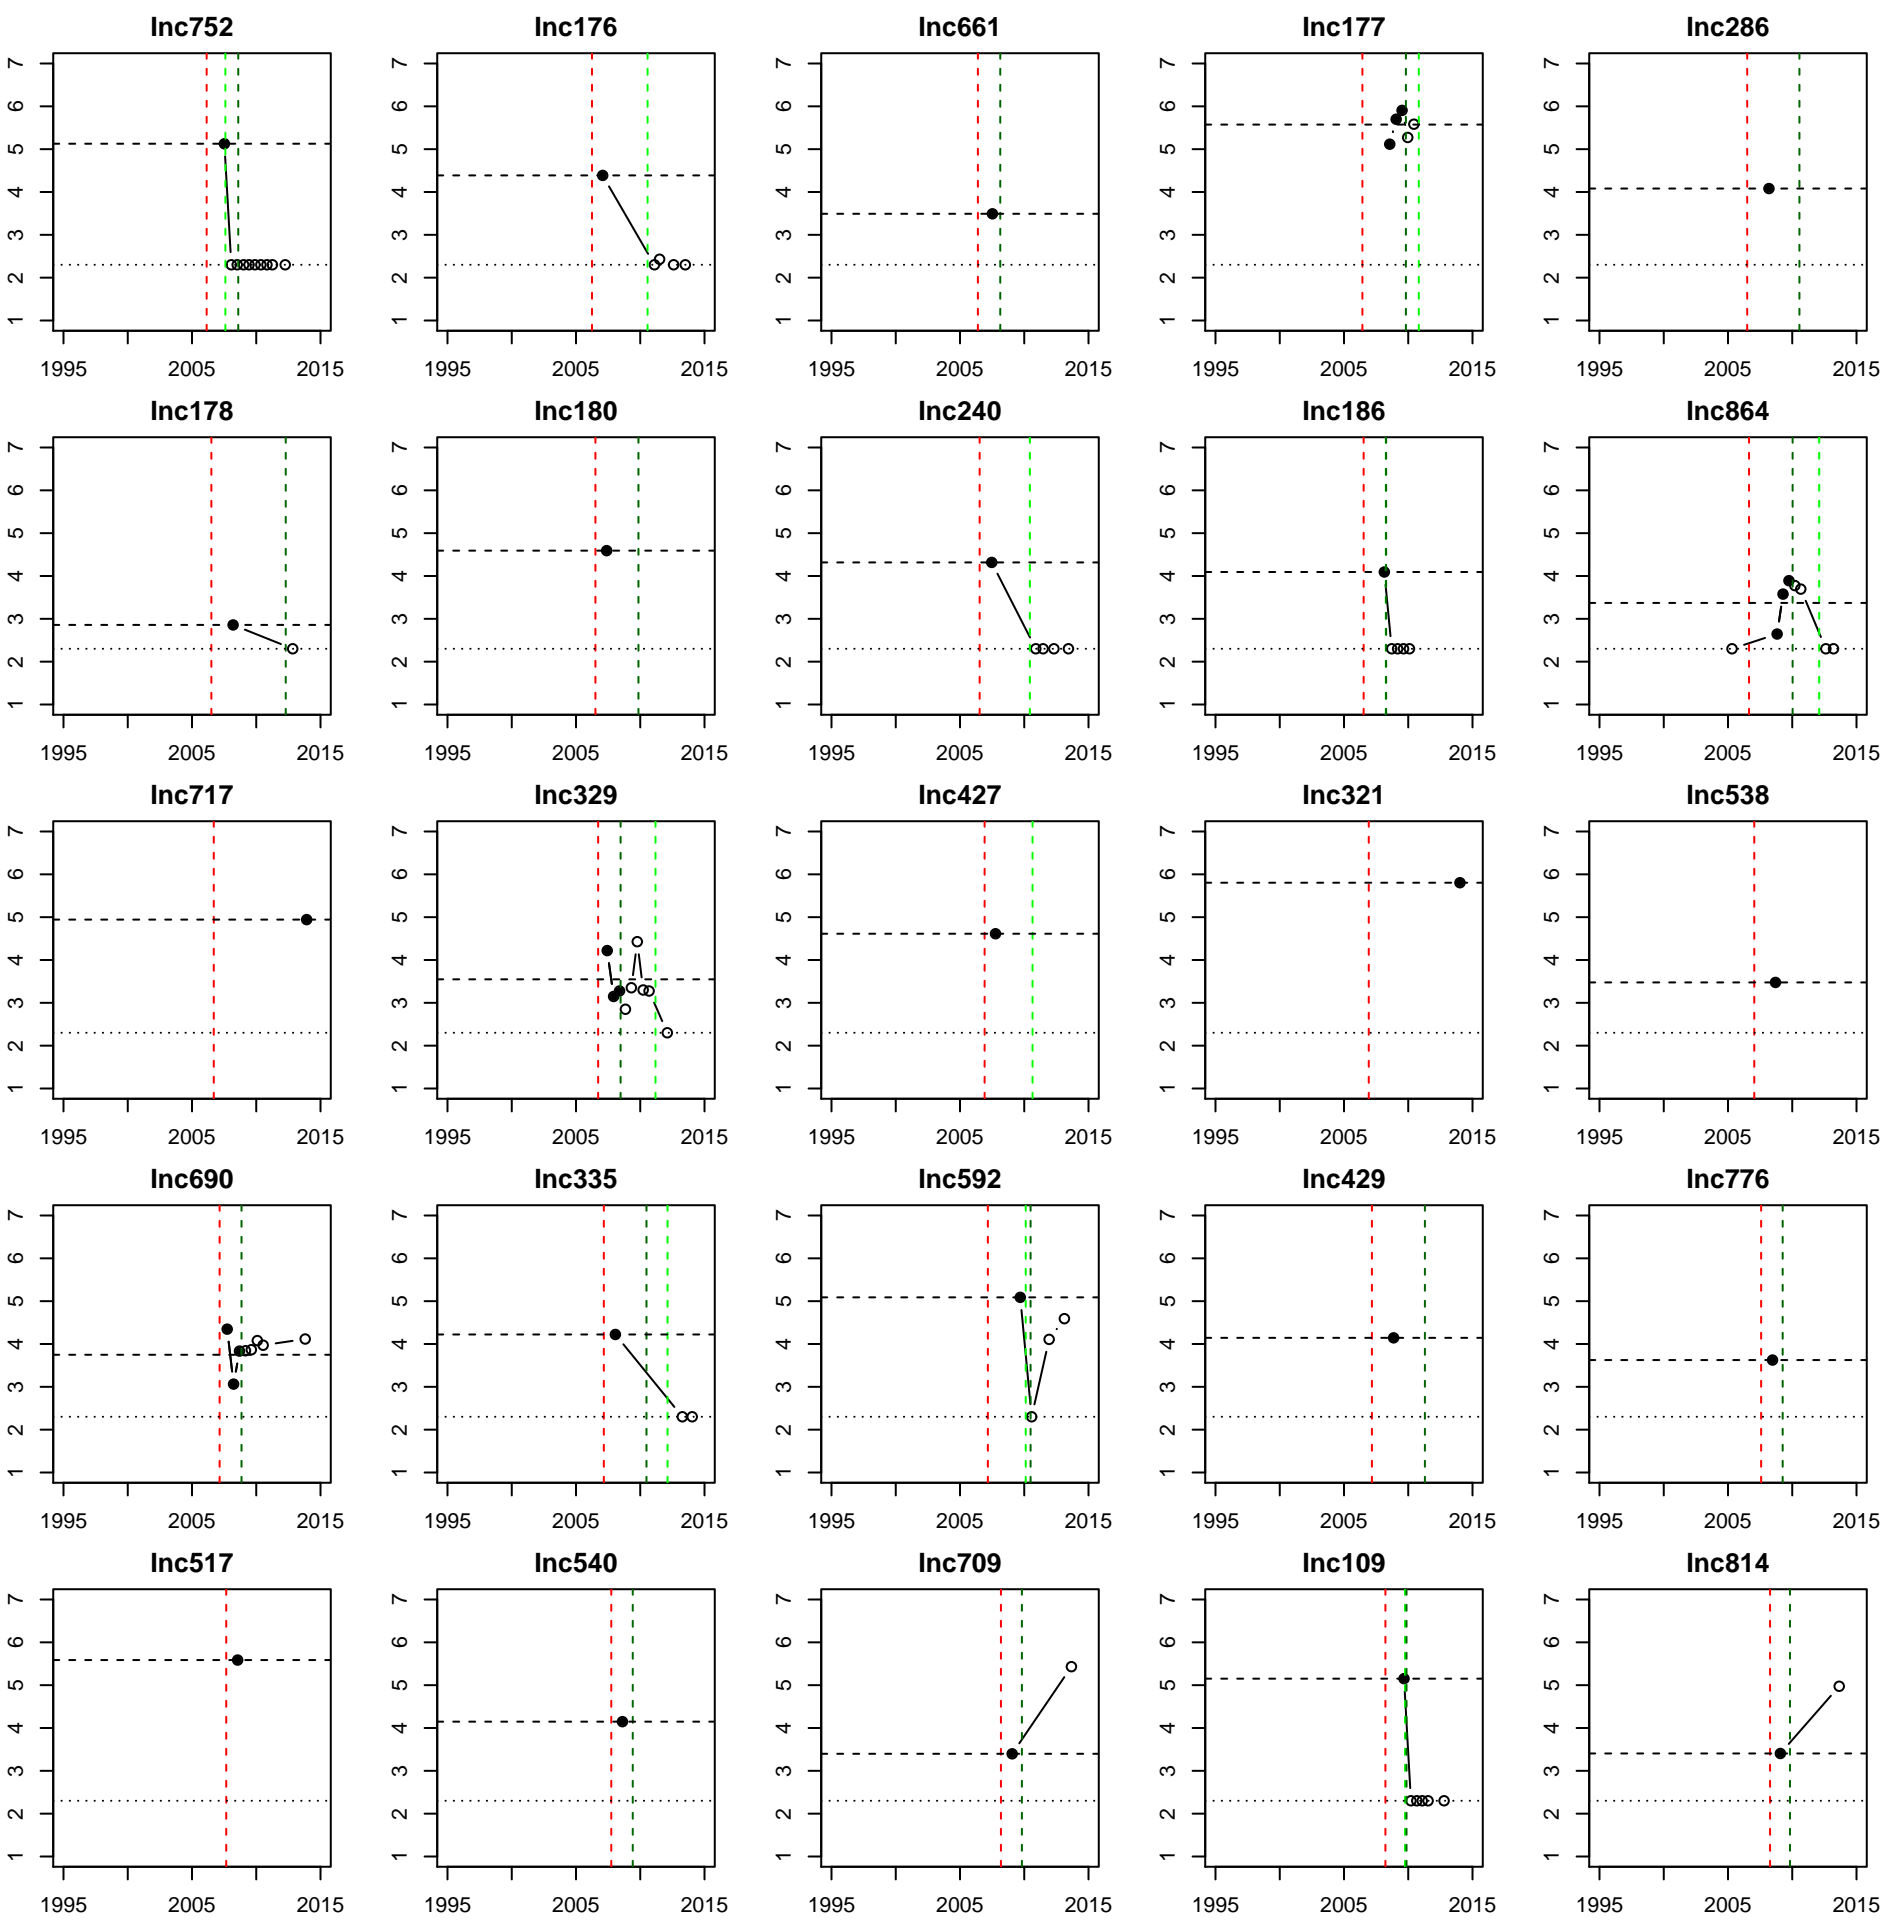

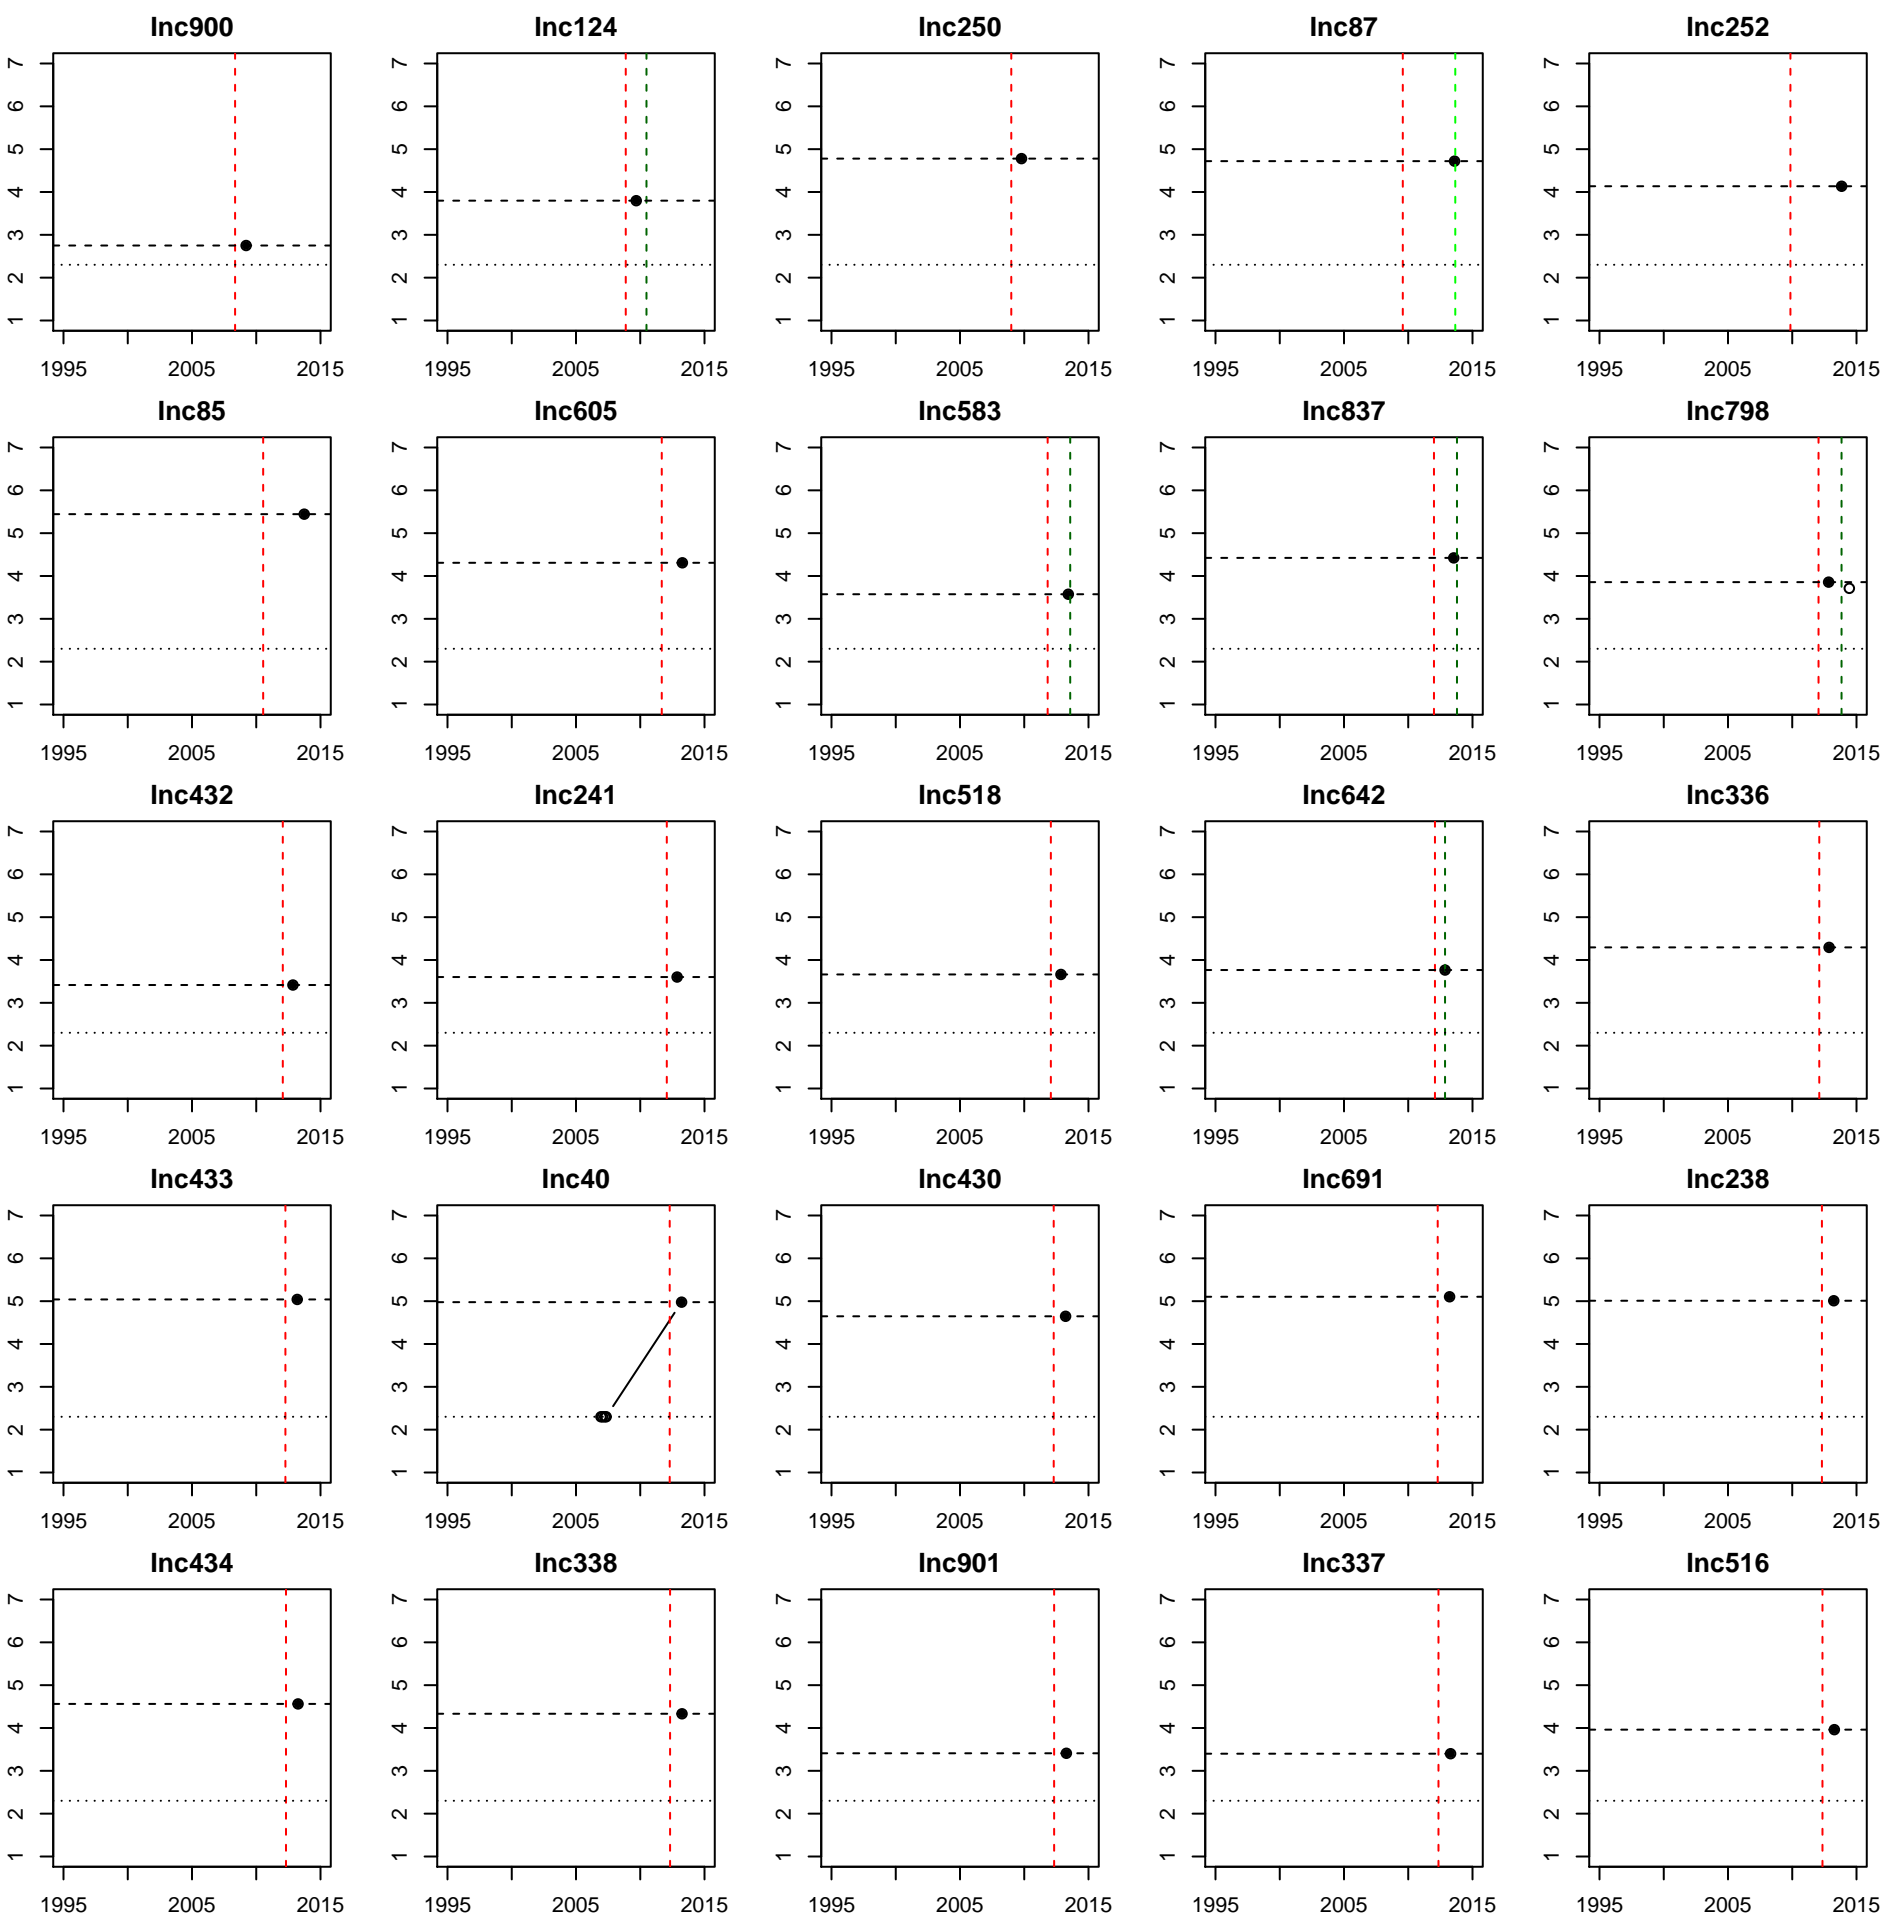

**Inc797**

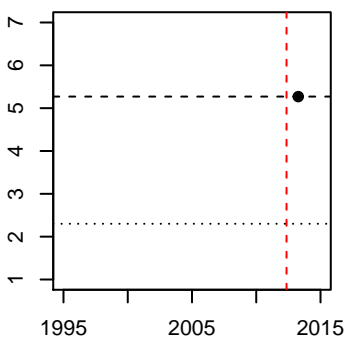

**Inc727**

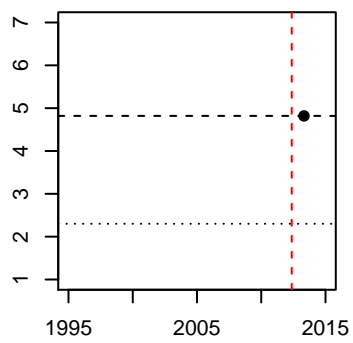

**Inc339**

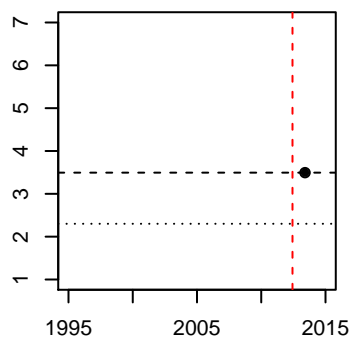

Supplement: supp [file elife-20492-supp-v2.zip]
