# Supplementary material for: A transmission-virulence evolutionary trade-off explains attenuation of HIV-1 in Uganda
Source: eLife journal article supplement (doi:10.7554/elife.20492), 2016-11-05
Supplement: supp [file elife-20492-supp-v1.zip]

Archive with 12 entries (12 files):
- elife_poa_e20492_Figure_1_figure_supplement_1.pdf
- elife_poa_e20492_Figure_2_figure_supplement_2.pdf
- elife_poa_e20492_Figure_2_figure_supplement_5.pdf
- elife_poa_e20492_Figure_1_figure_supplement_2.pdf
- elife_poa_e20492_Figure_1_figure_supplement_3.pdf
- elife_poa_e20492_Figure_2_figure_supplement_3.pdf
- elife_poa_e20492_Figure_2_figure_supplement_4.pdf
- elife_poa_e20492_Figure_2_figure_supplement_6.pdf
- elife_poa_e20492_Figure_1_source_data_1.docx
- elife_poa_e20492_Figure_2_source_data_1.docx
- elife_poa_e20492_Supplementary_File_1.pdf
- elife_poa_e20492_Figure_2_figure_supplement_1.pdf
