# Supplementary material for: A transmission-virulence evolutionary trade-off explains attenuation of HIV-1 in Uganda
Source: eLife journal article supplement (doi:10.7554/elife.20492), 2016-11-05

### Scenario 1 for within-host evolution

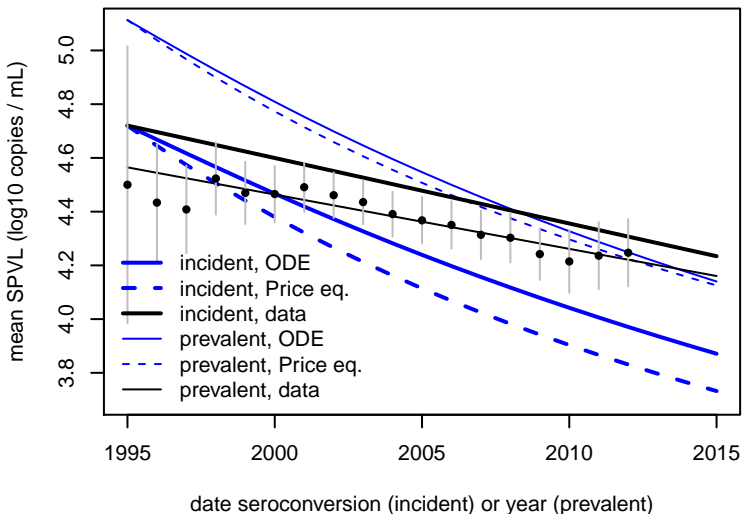

### Scenario 2 for within-host evolution

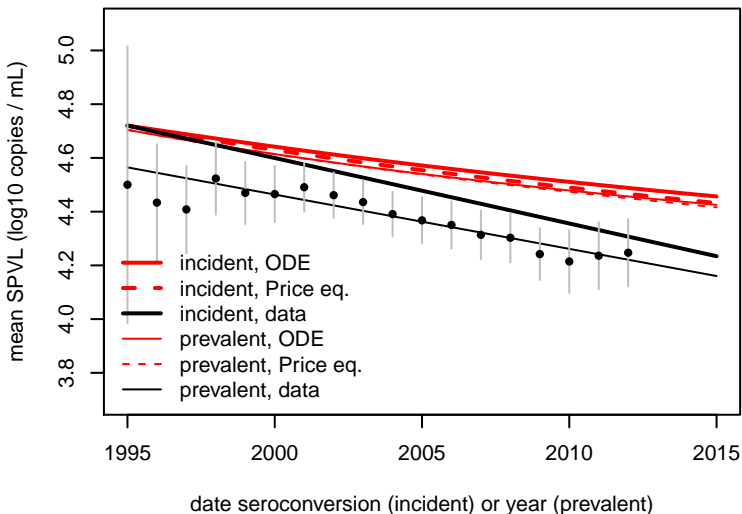

### Scenario 3 for within-host evolution

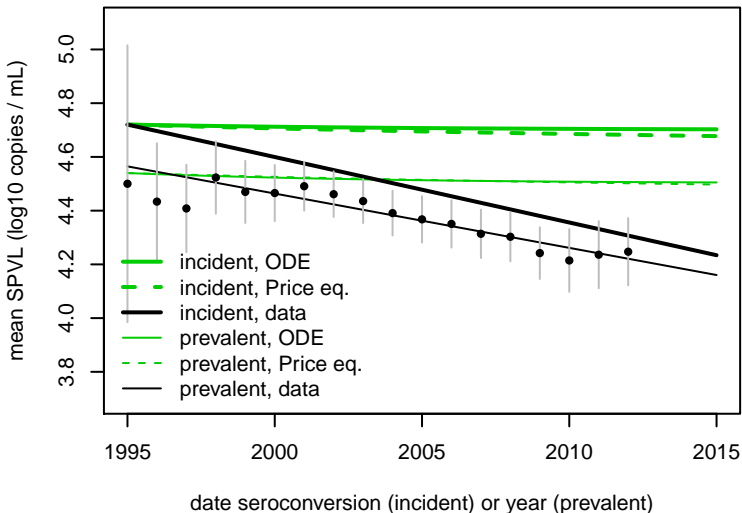

Supplement: supp [file elife-20492-supp-v1.zip › elife_poa_e20492_Figure_2_figure_supplement_6.pdf]
