# Supplementary figures and images for: A transmission-virulence evolutionary trade-off explains attenuation of HIV-1 in Uganda
Source: eLife journal article supplement (doi:10.7554/elife.20492), 2016-11-05

**a**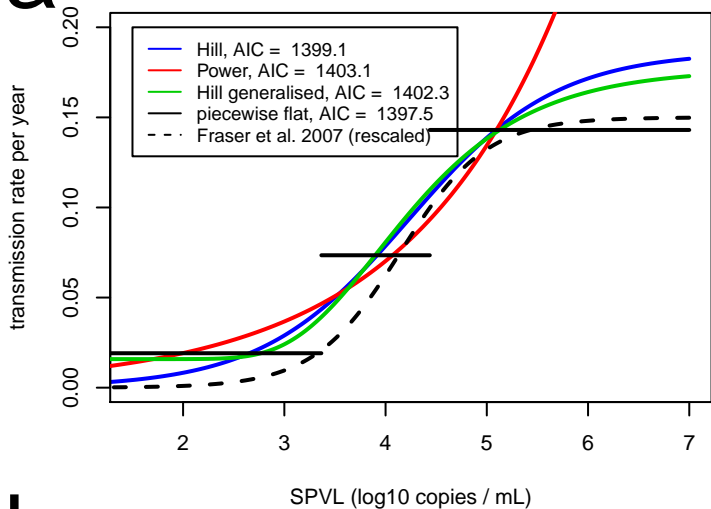**b**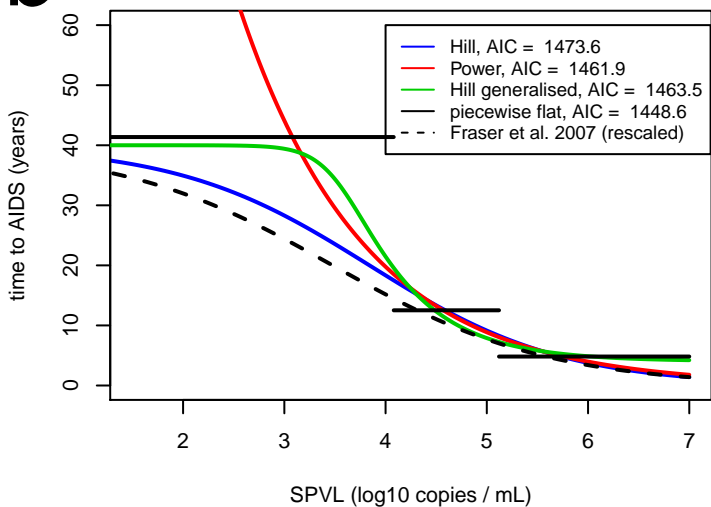

Supplement: supp [file elife-20492-supp-v1.zip › elife_poa_e20492_Figure_1_figure_supplement_1.pdf]

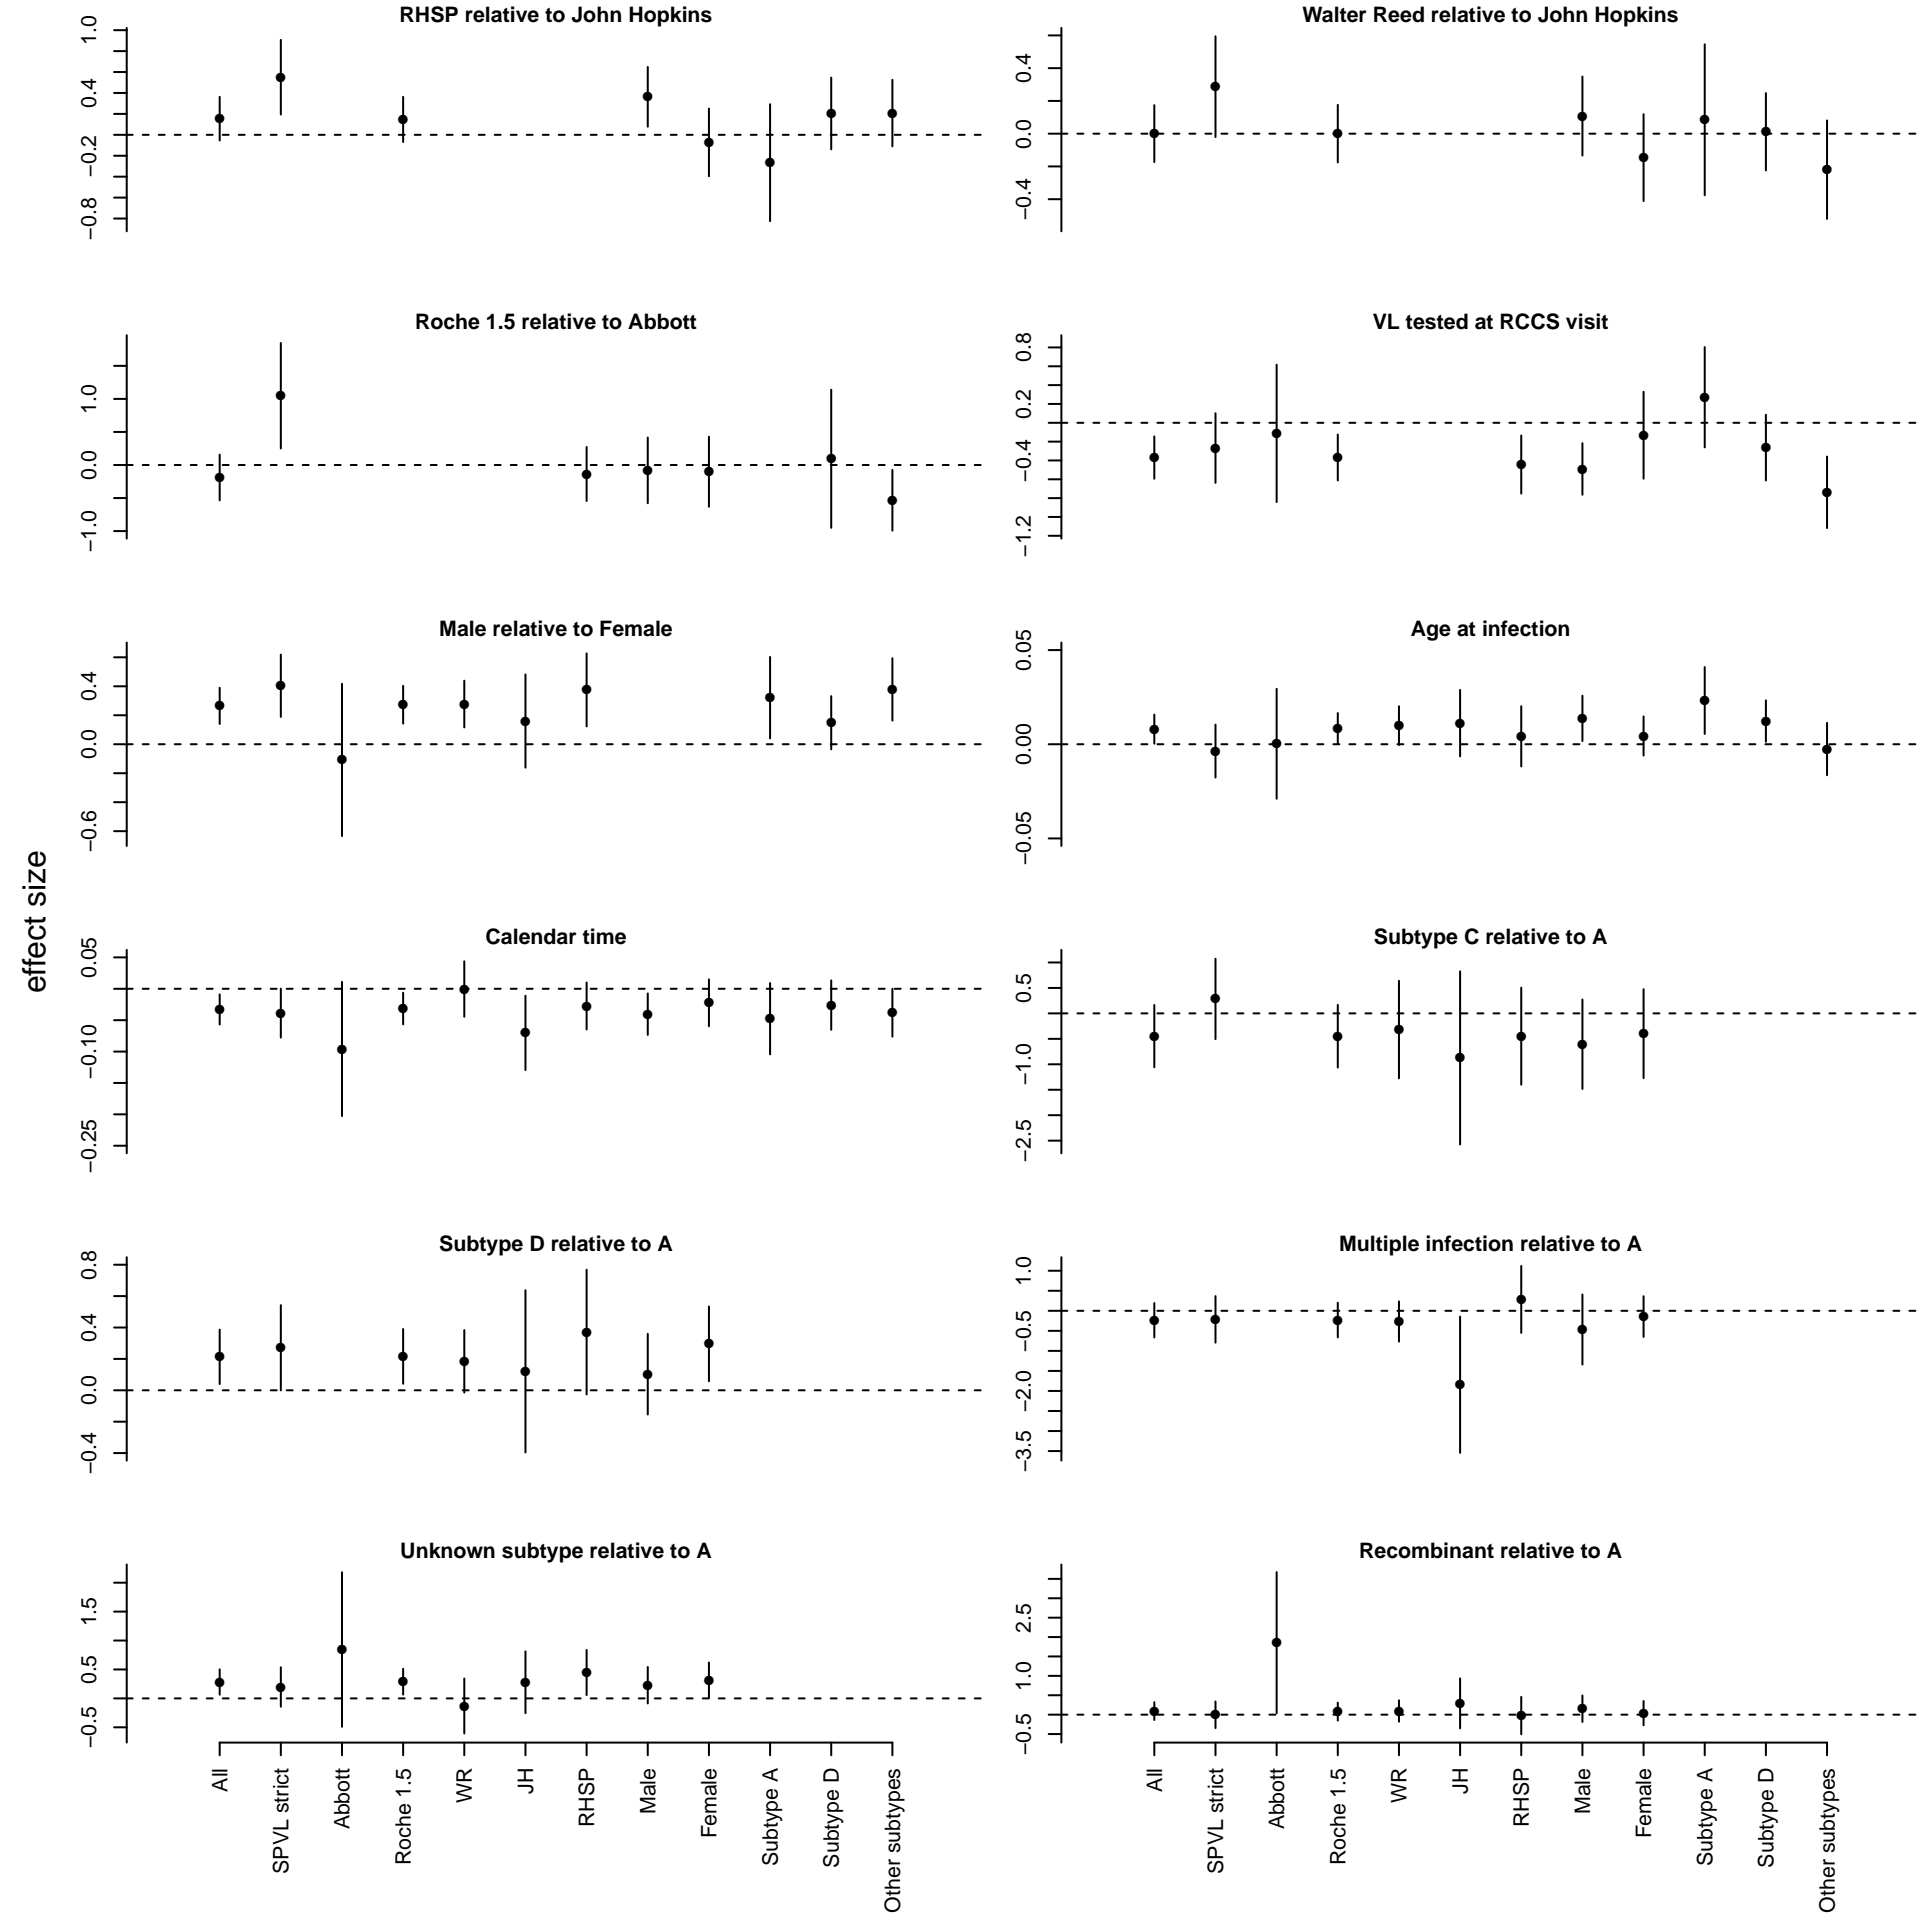

Supplement: supp [file elife-20492-supp-v1.zip › elife_poa_e20492_Figure_2_figure_supplement_2.pdf]

mean SPVL (log10 copies / mL)

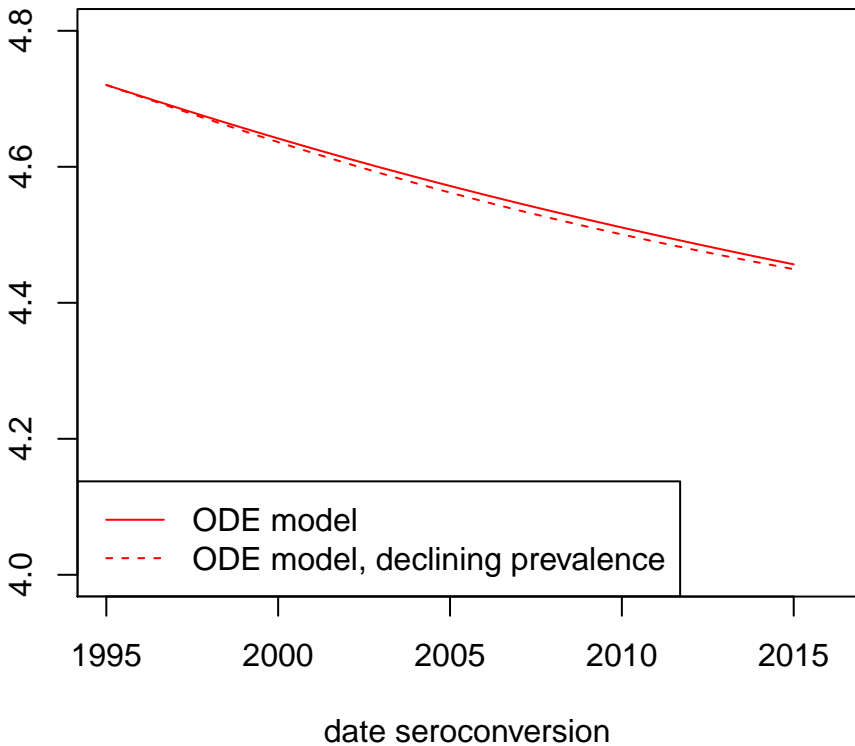

Supplement: supp [file elife-20492-supp-v1.zip › elife_poa_e20492_Figure_2_figure_supplement_5.pdf]

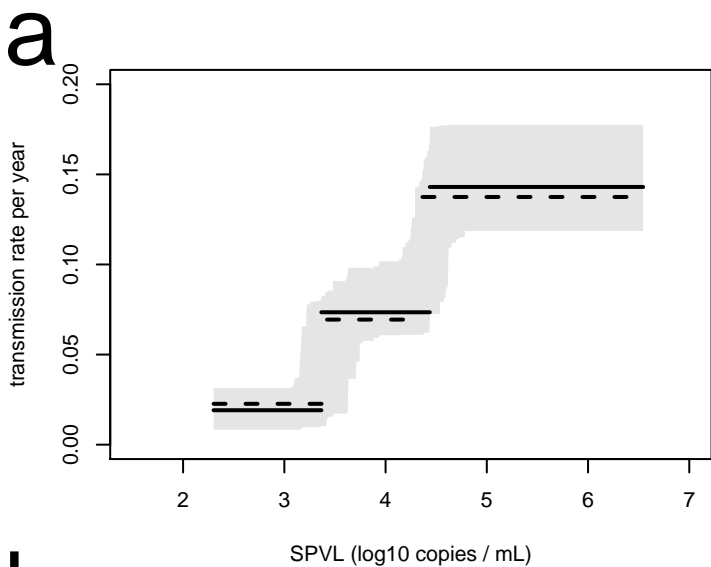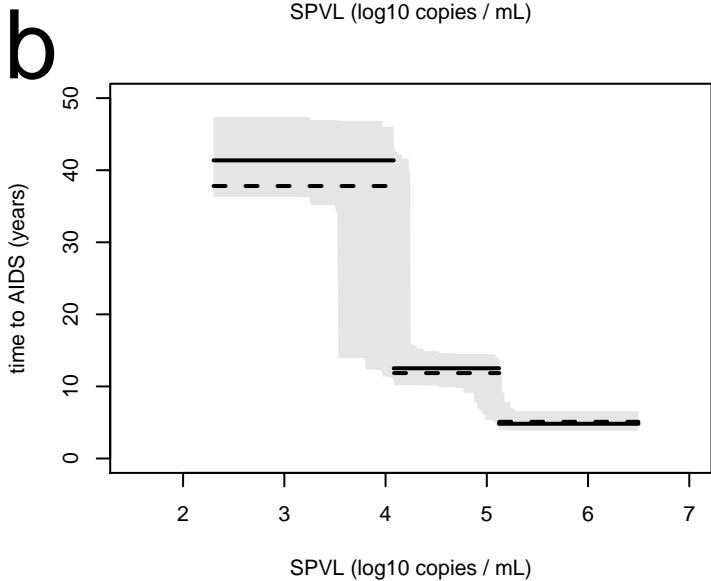

Supplement: supp [file elife-20492-supp-v1.zip › elife_poa_e20492_Figure_1_figure_supplement_2.pdf]

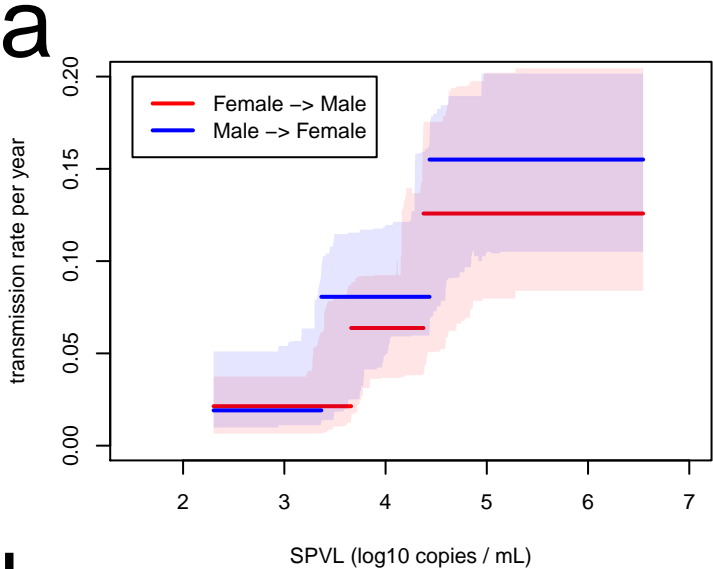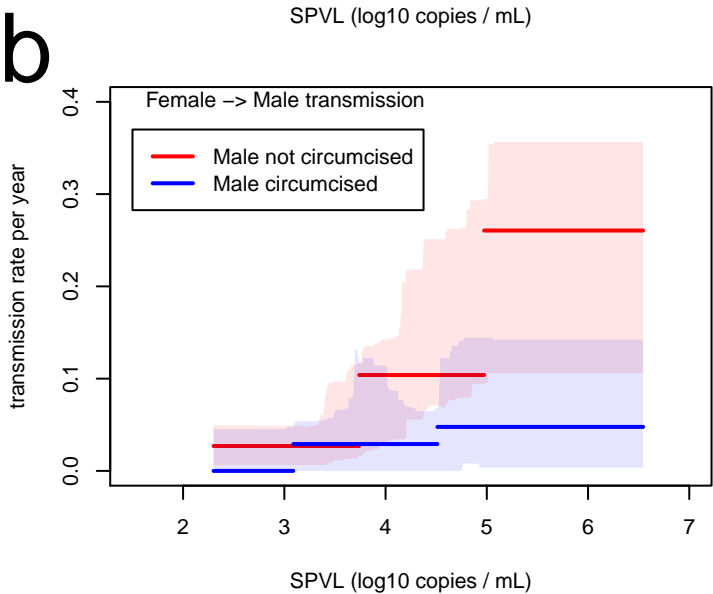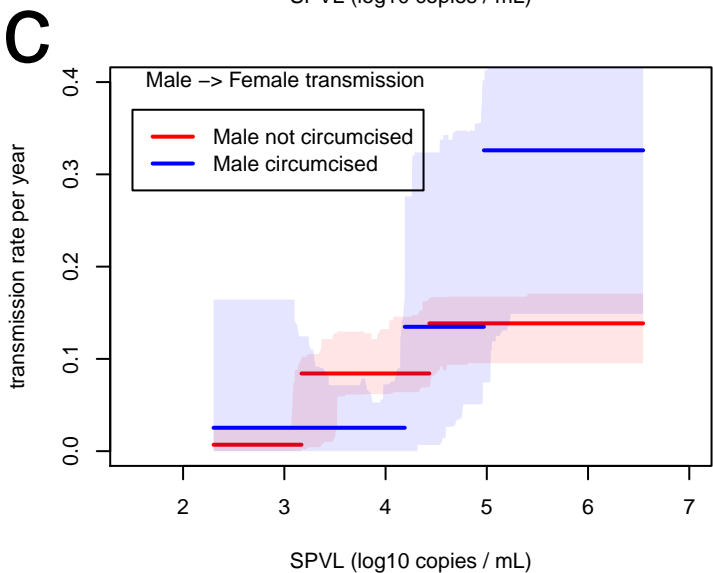

Supplement: supp [file elife-20492-supp-v1.zip › elife_poa_e20492_Figure_1_figure_supplement_3.pdf]

mean SPVL (log10 copies/mL)

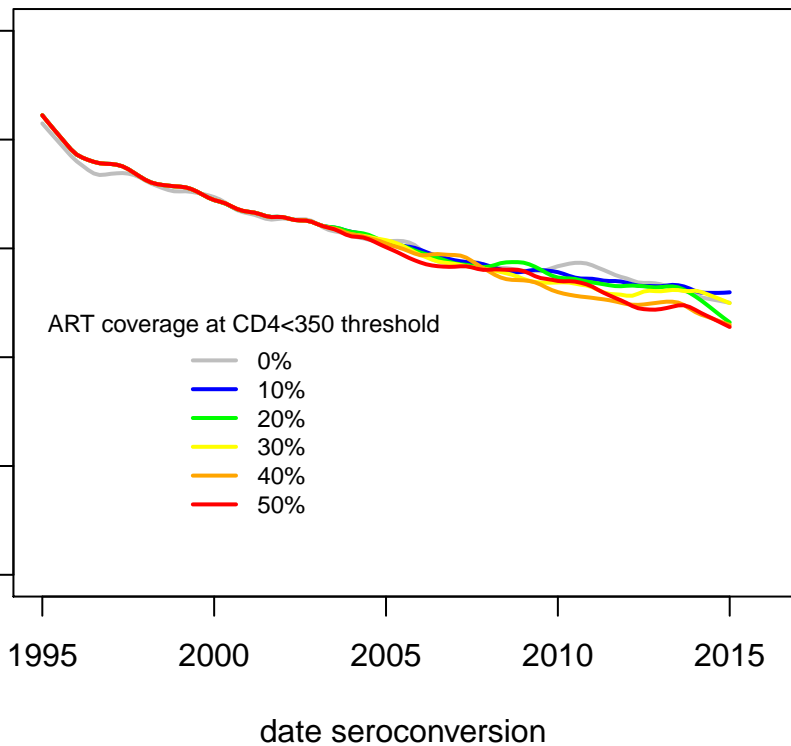

Supplement: supp [file elife-20492-supp-v1.zip › elife_poa_e20492_Figure_2_figure_supplement_3.pdf]

SPVL (log<sub>10</sub> copies/mL)

6  
5  
4  
3

1995–1996

1997–1999

2000–2001

2002–2003

2004–2012

90 %

50 %

10 %

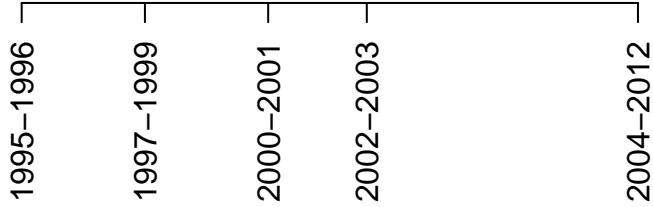

Supplement: supp [file elife-20492-supp-v1.zip › elife_poa_e20492_Figure_2_figure_supplement_4.pdf]

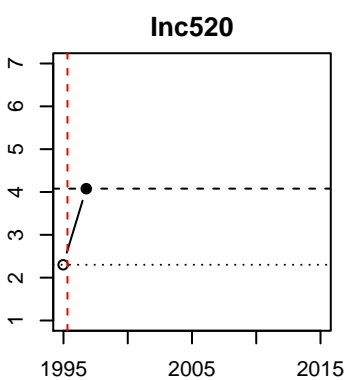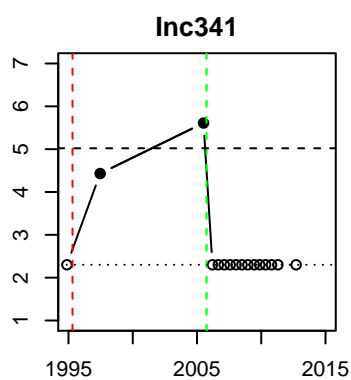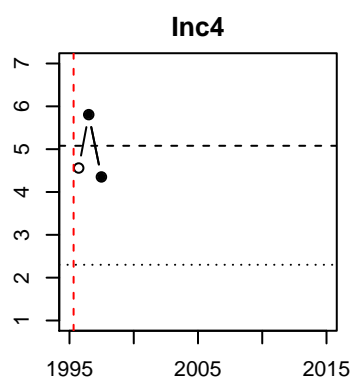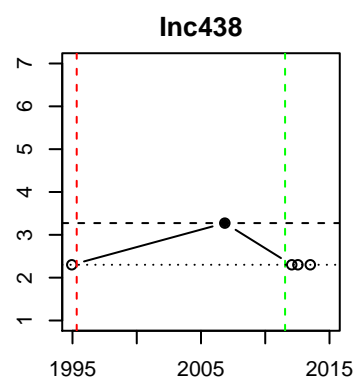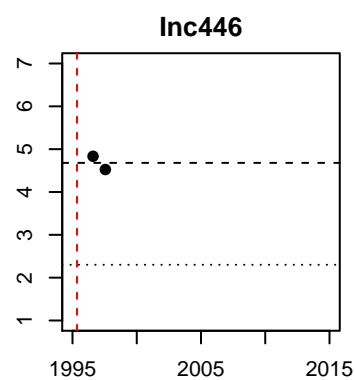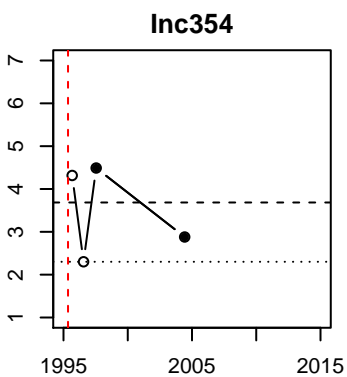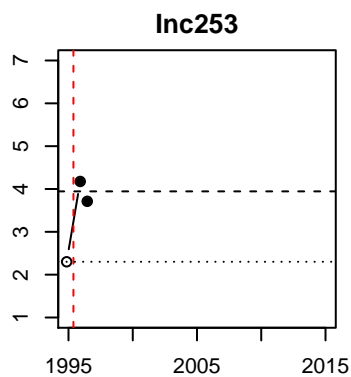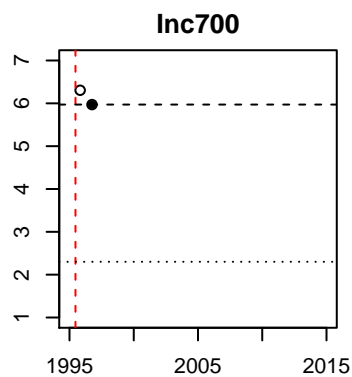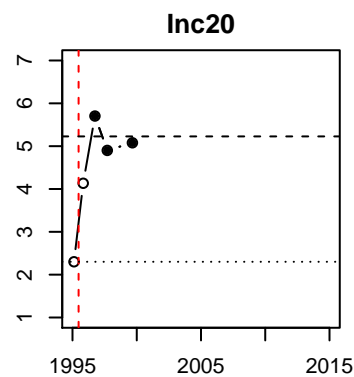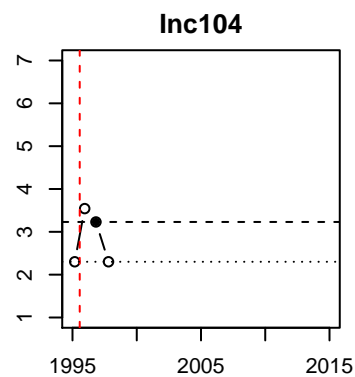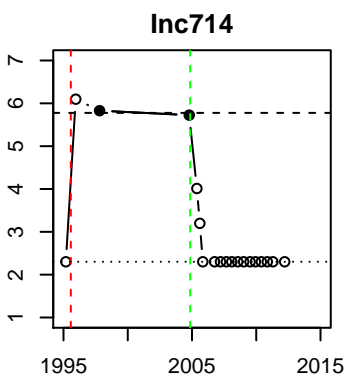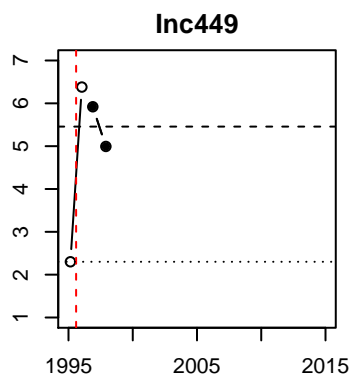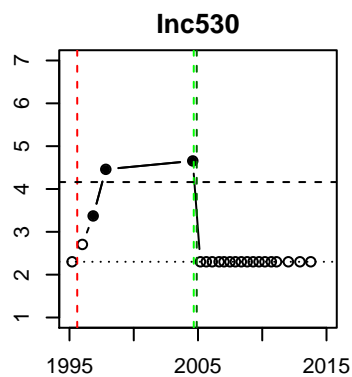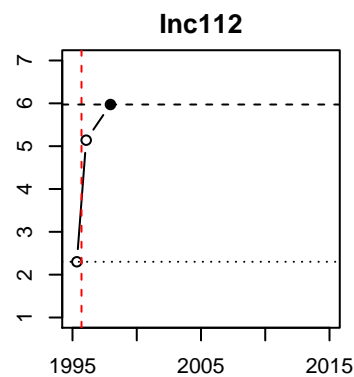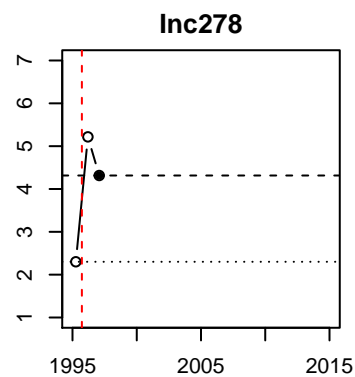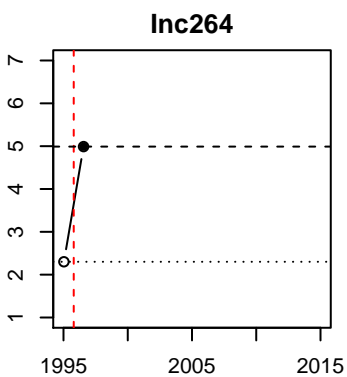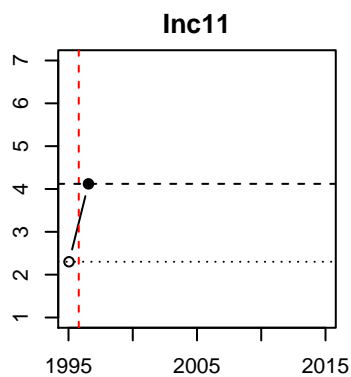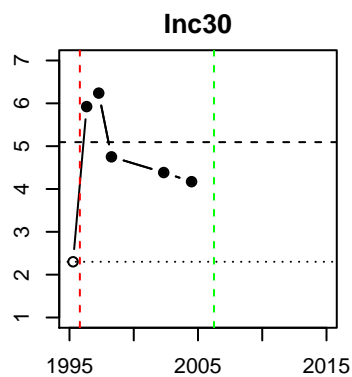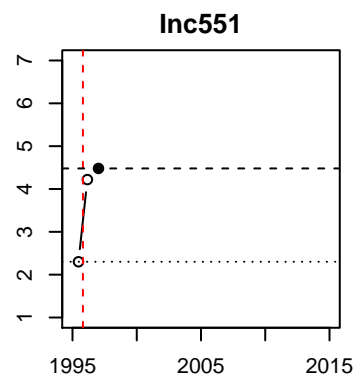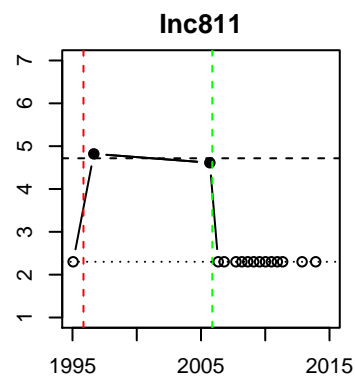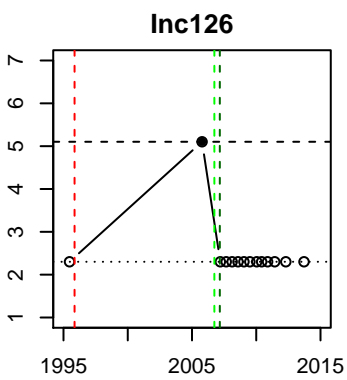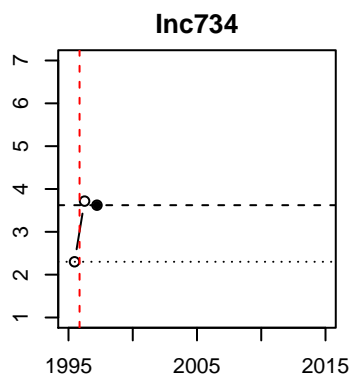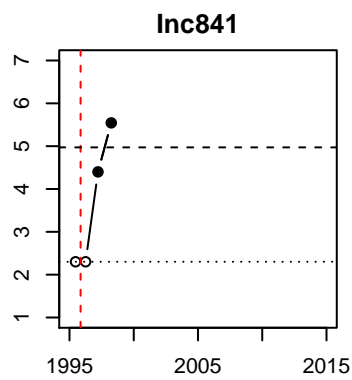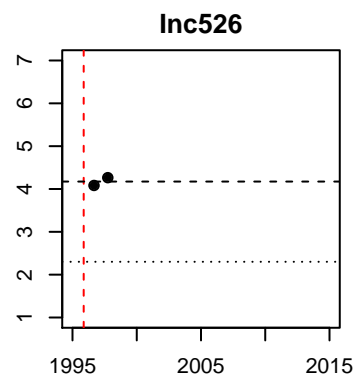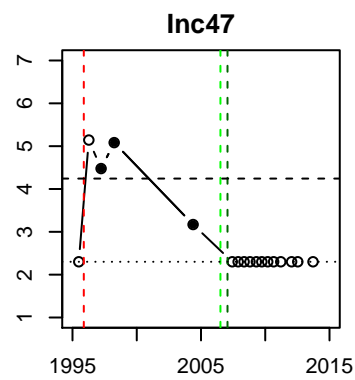

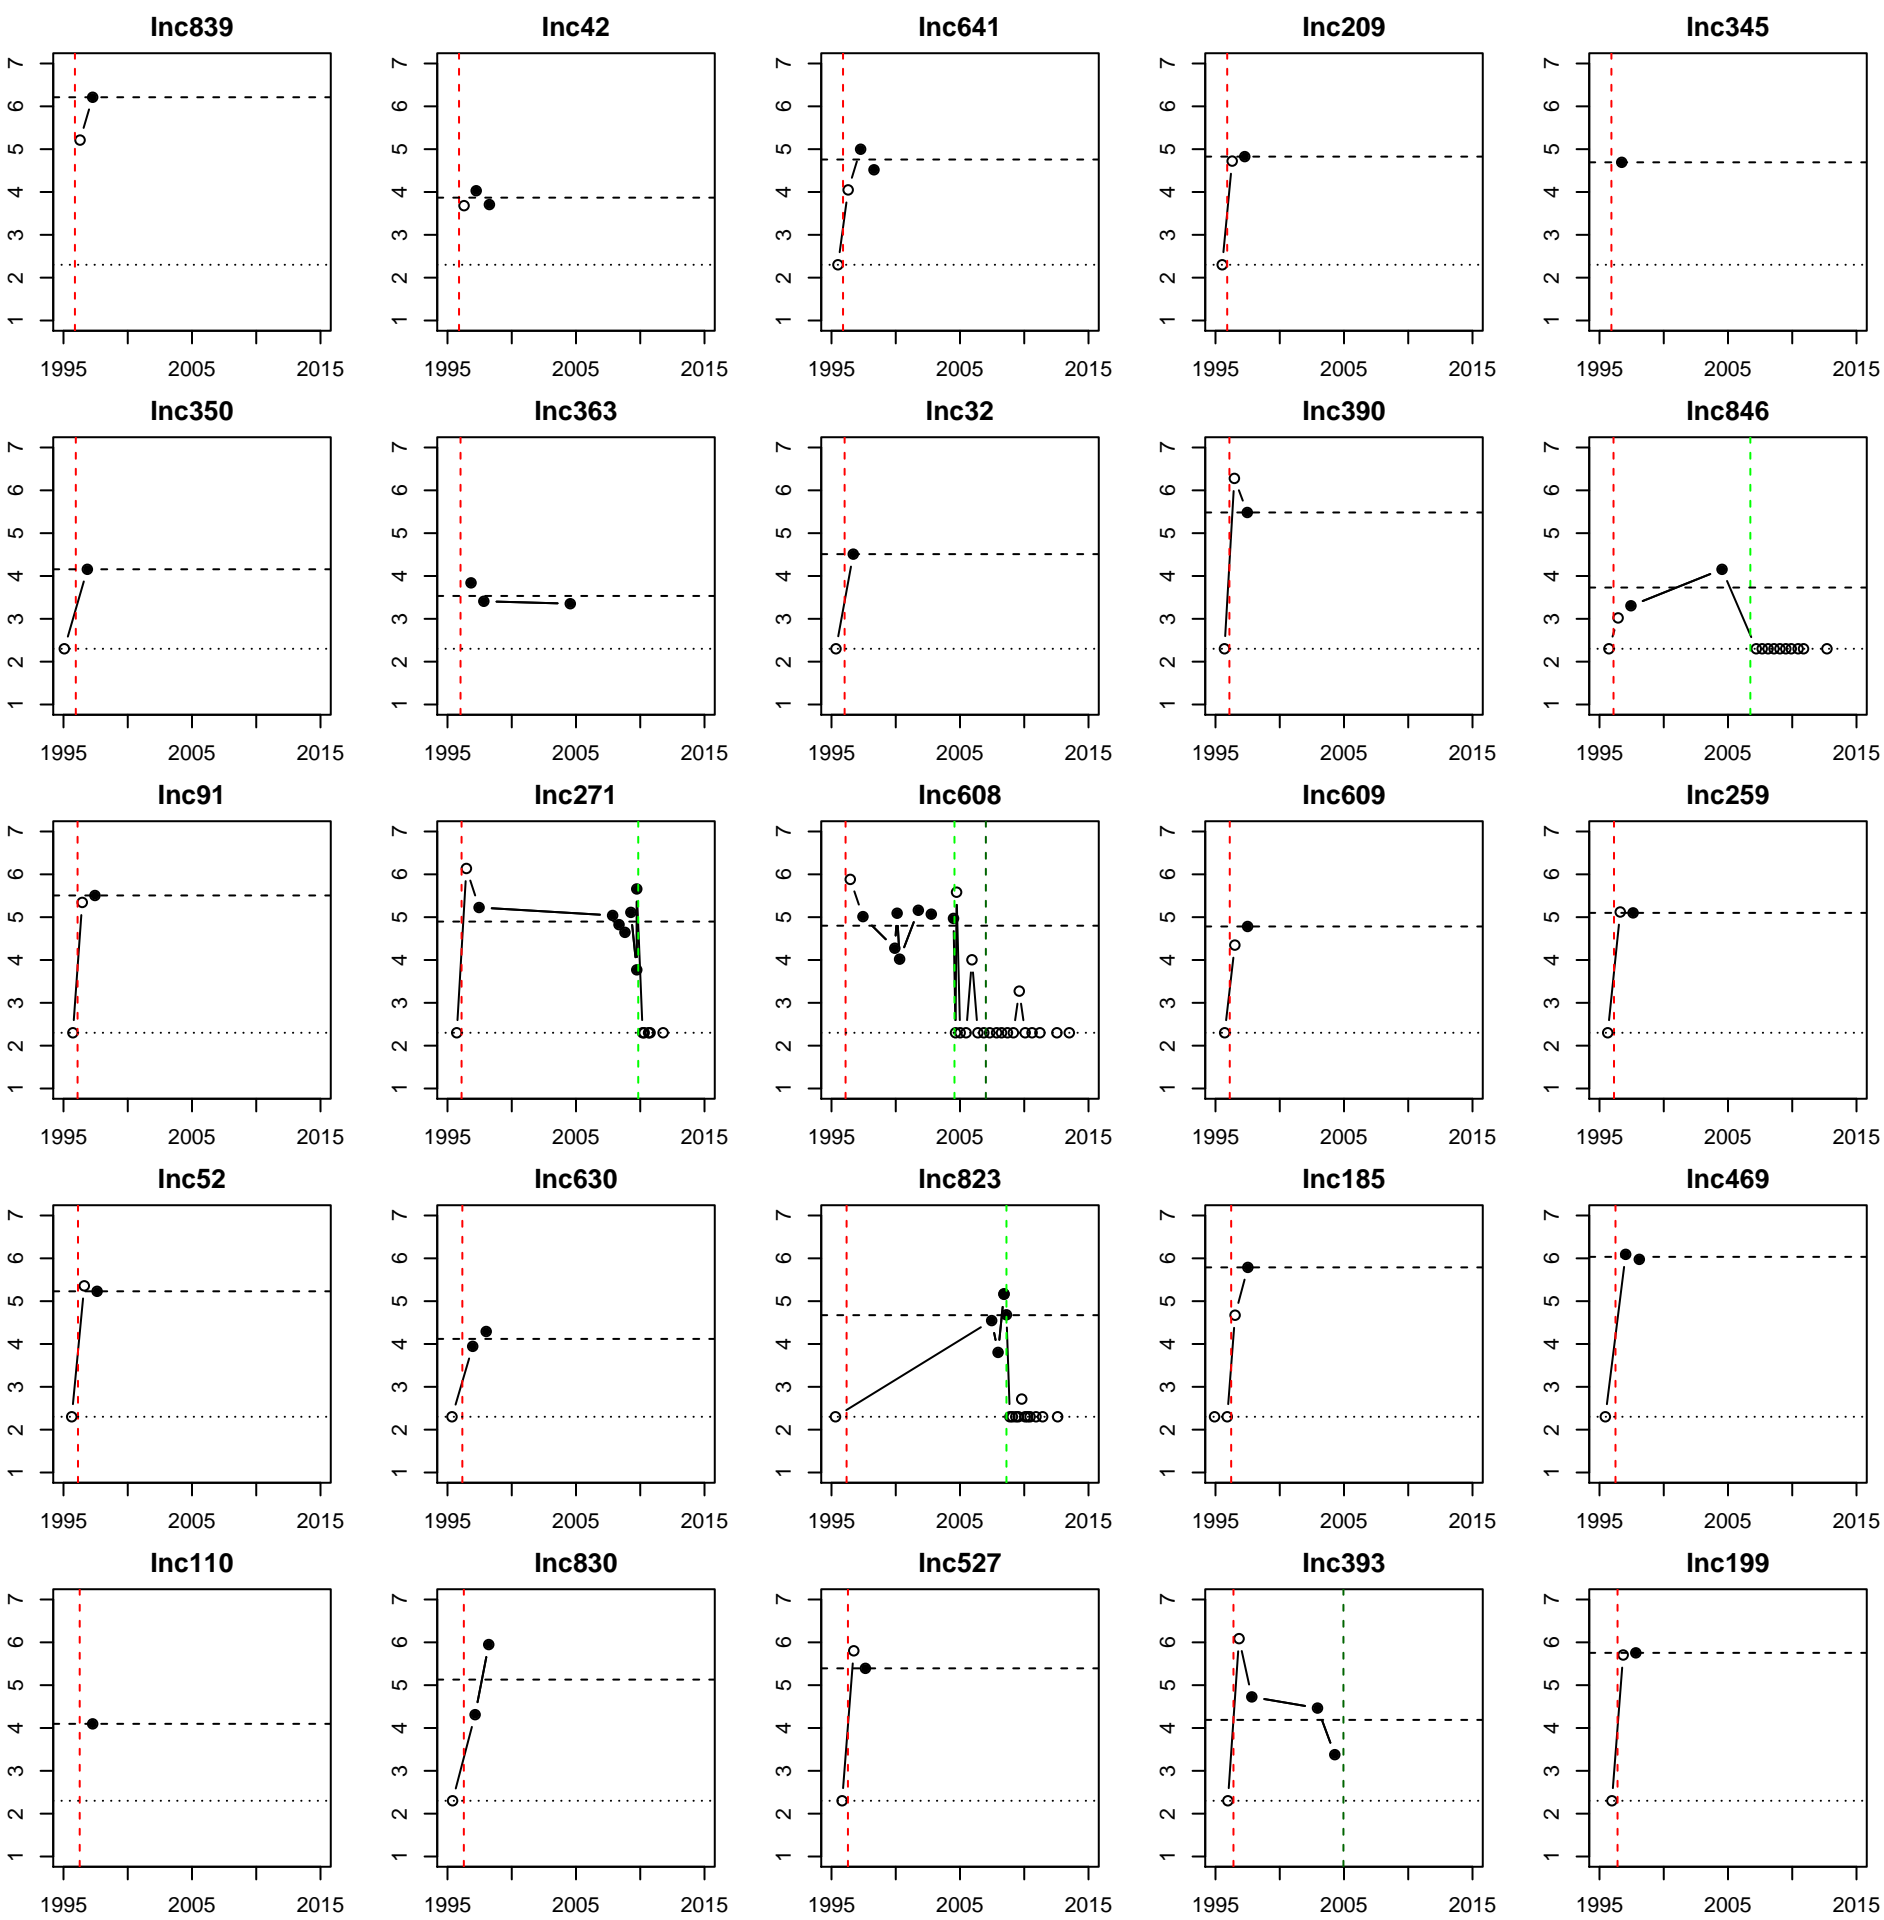

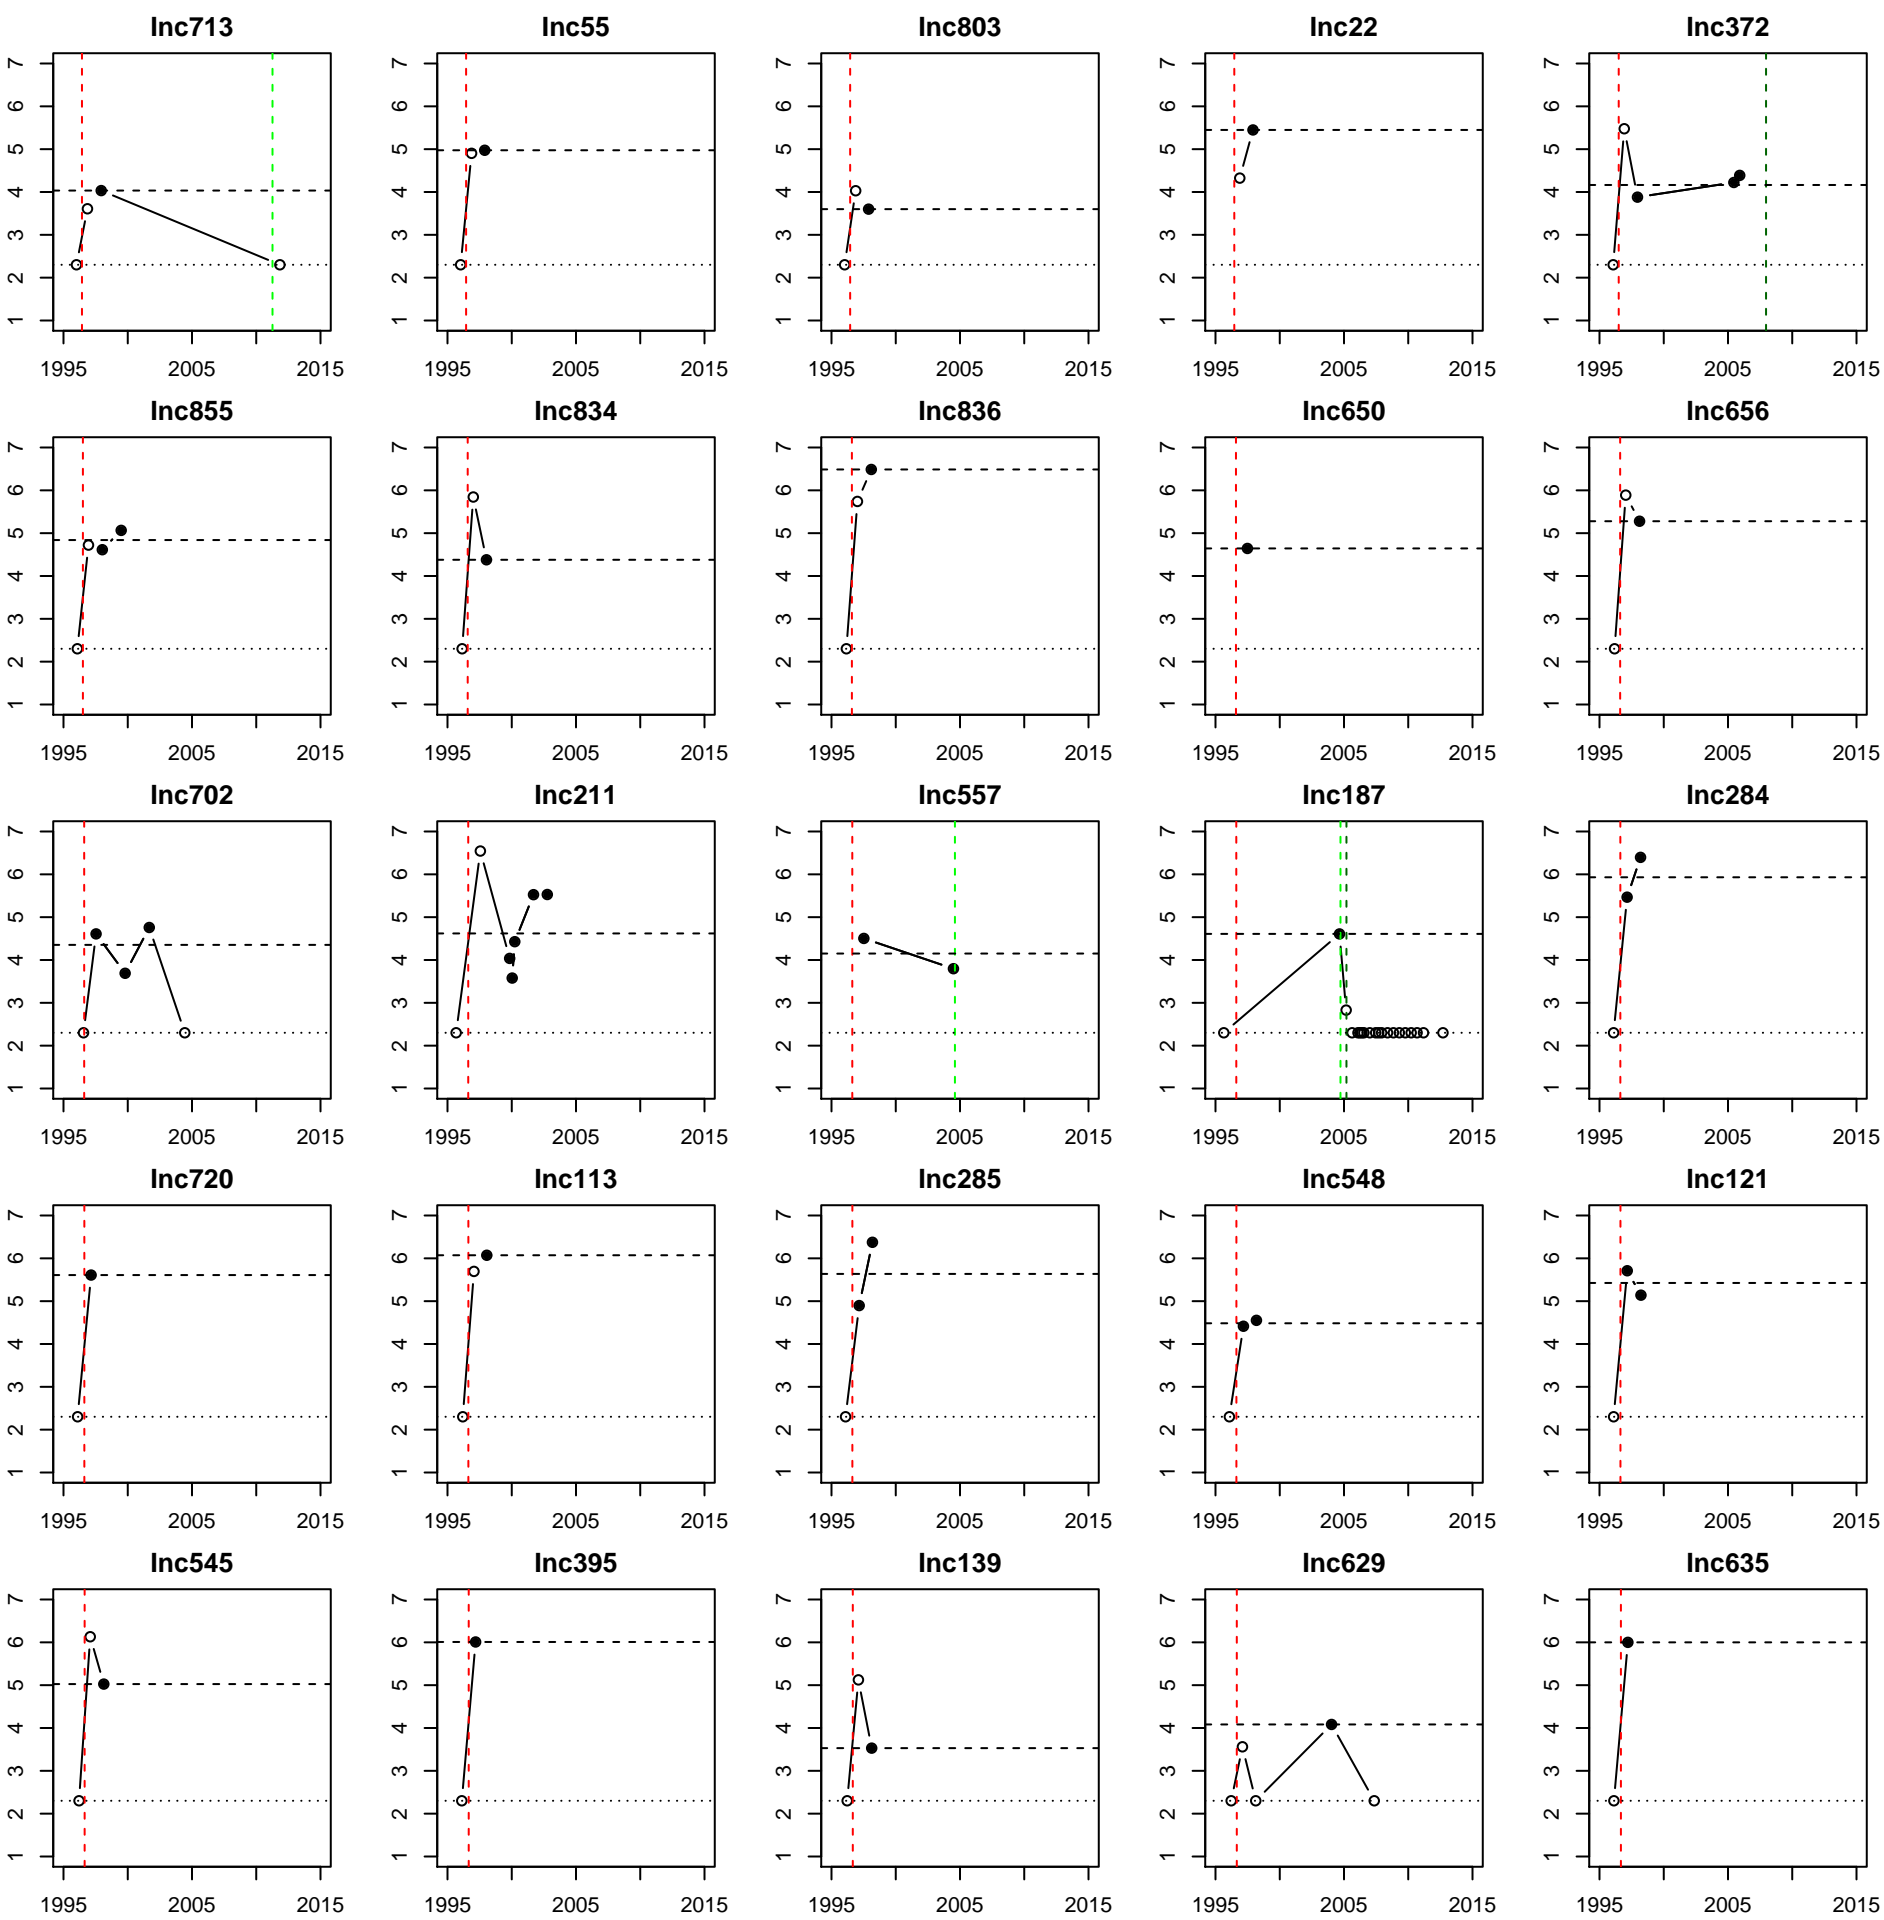

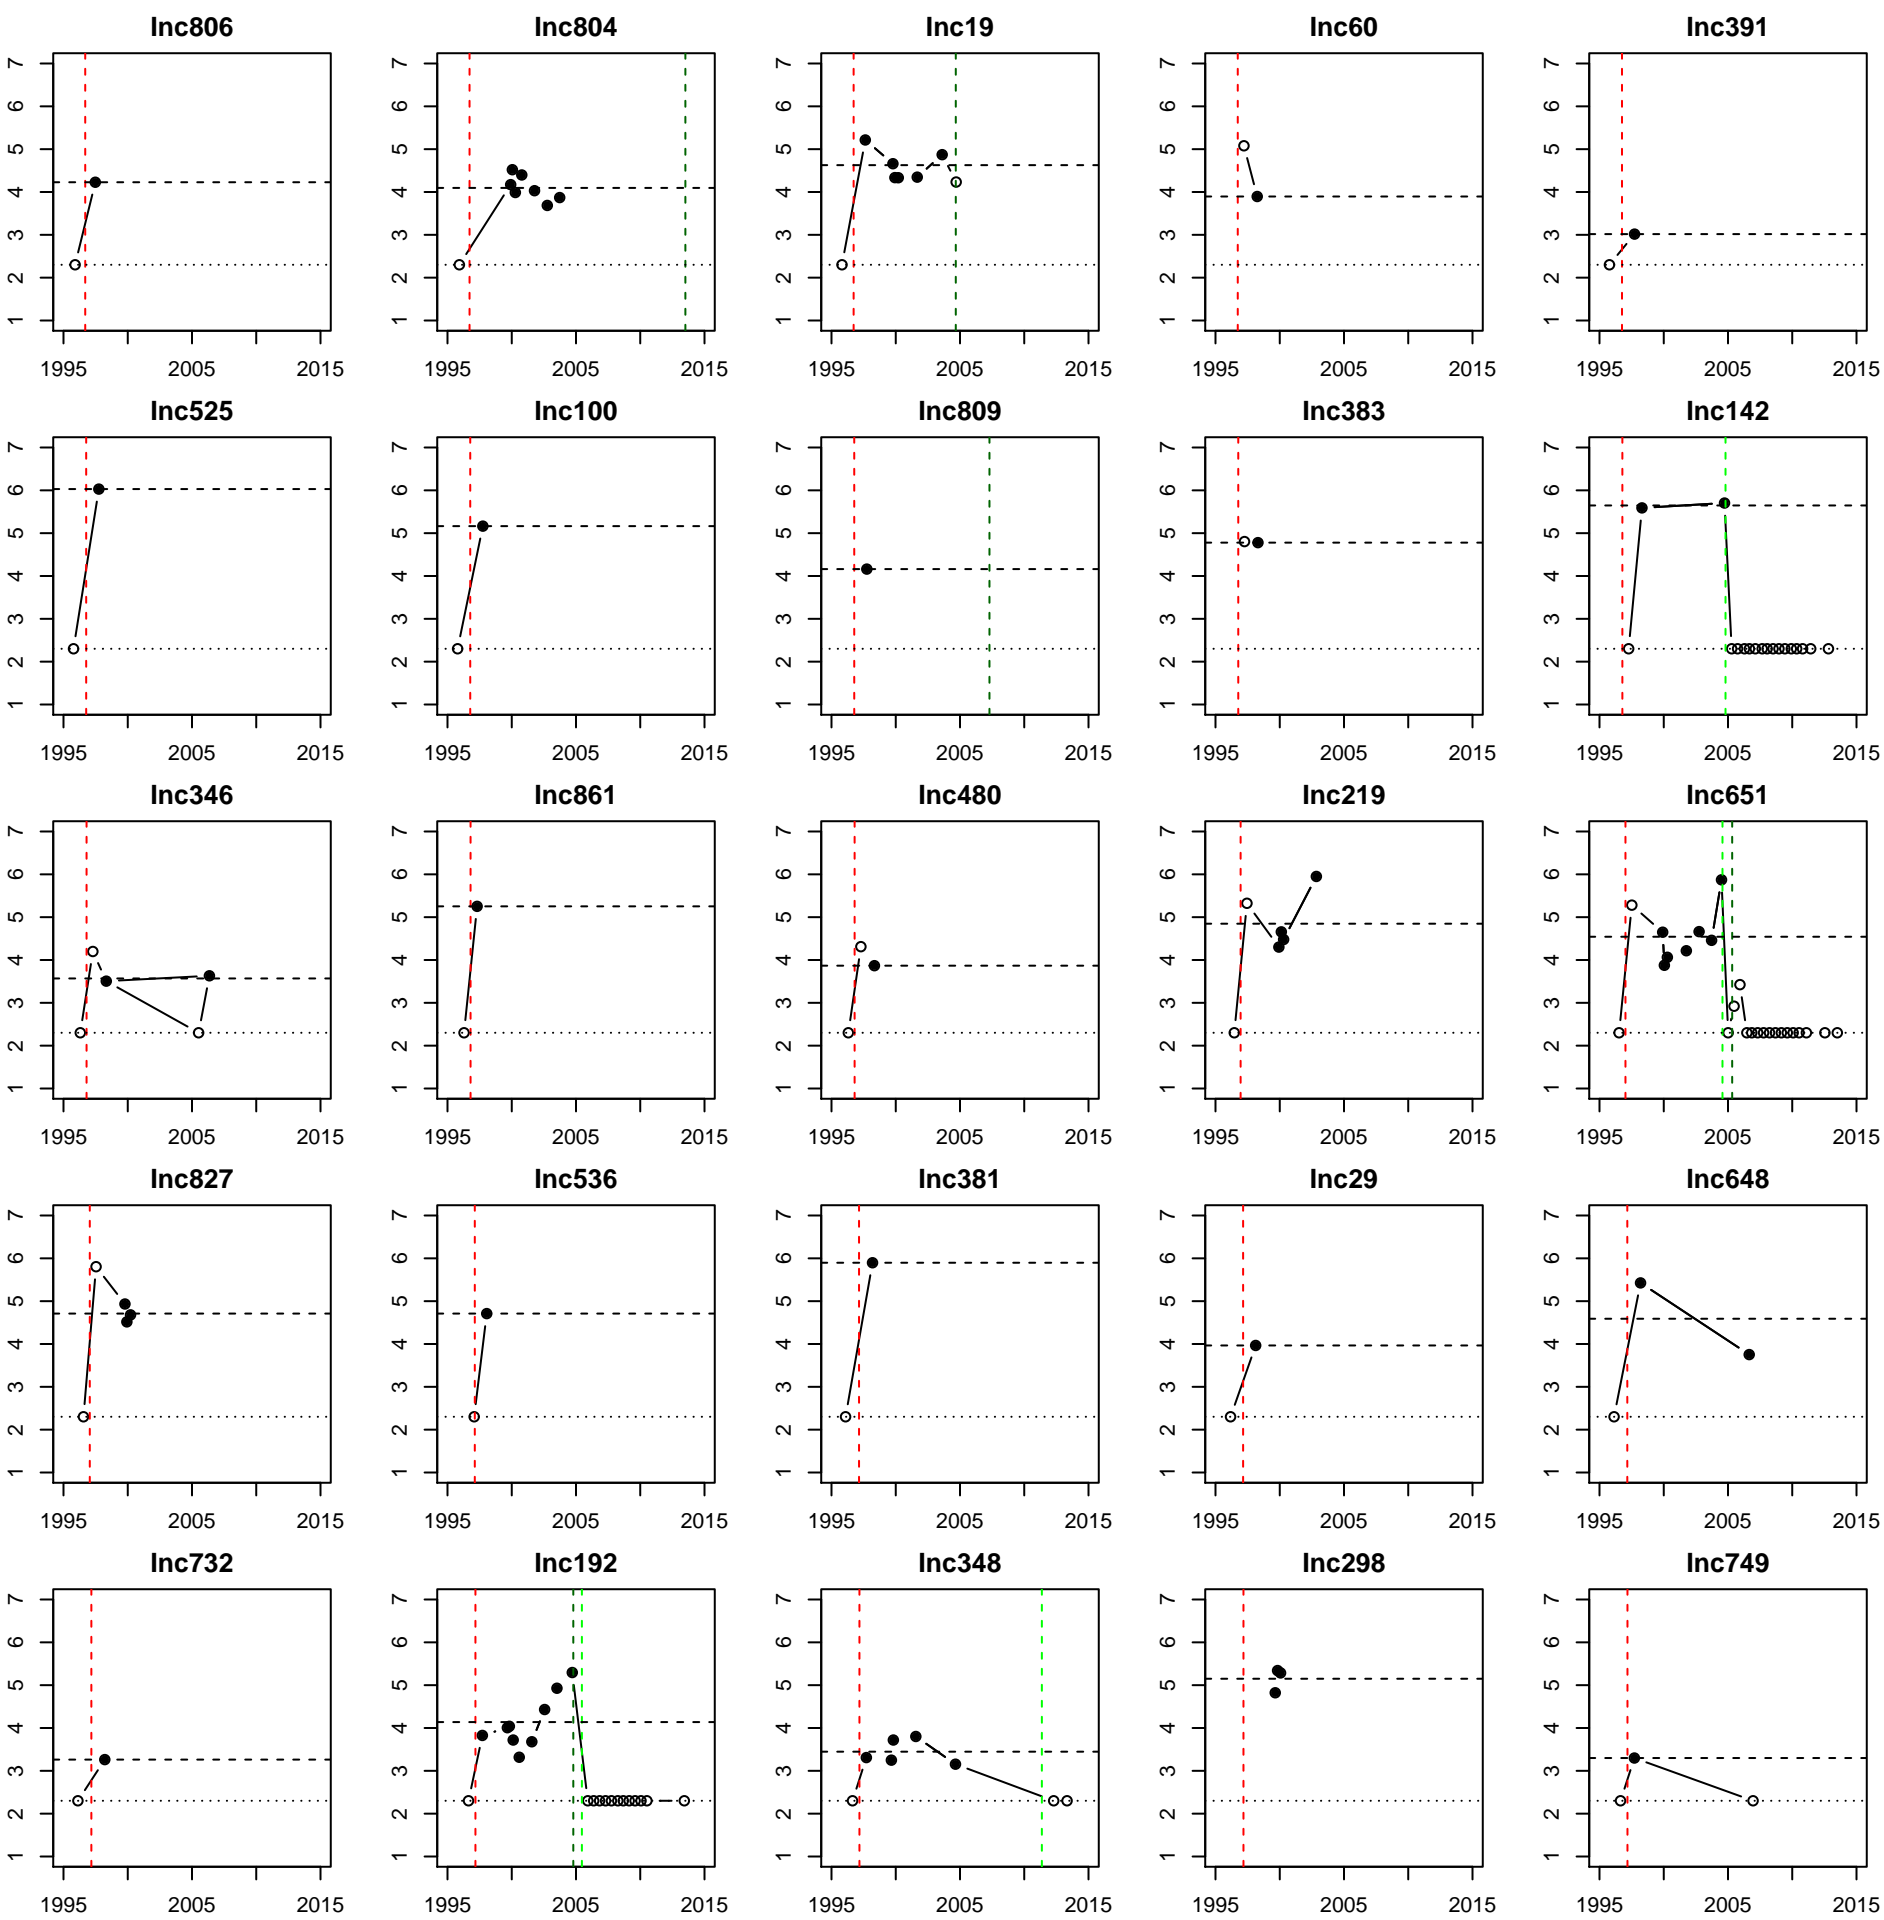

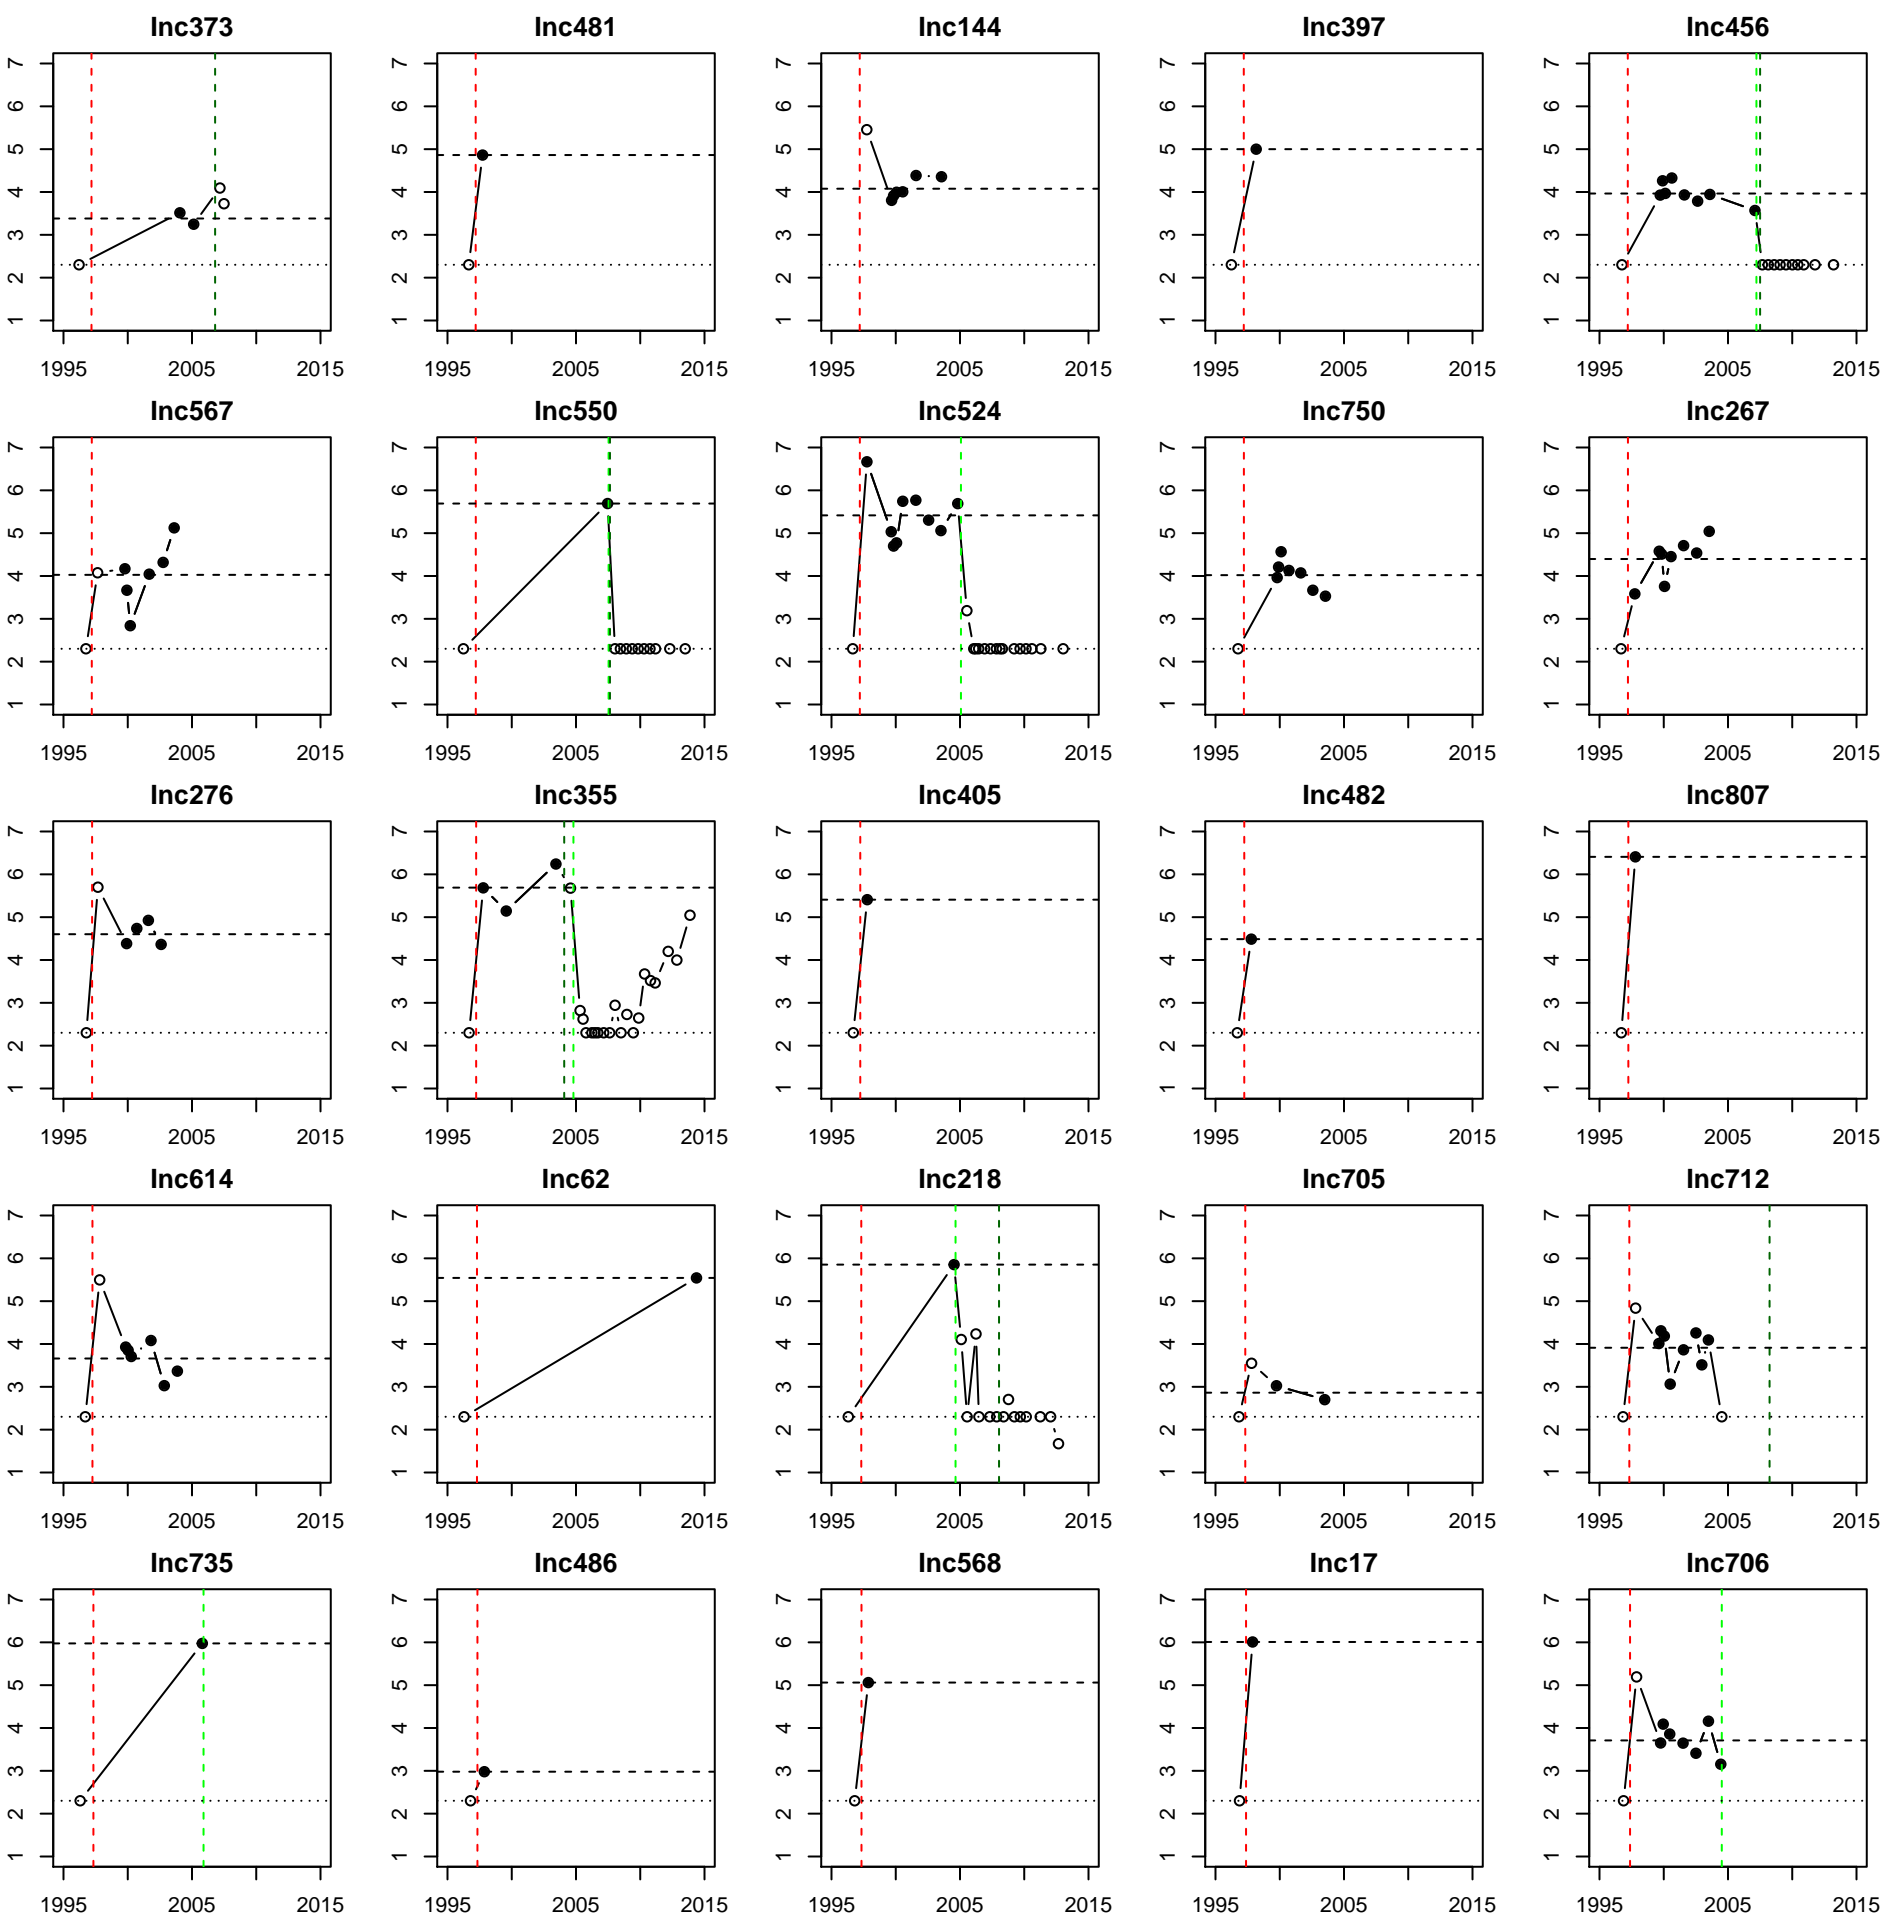

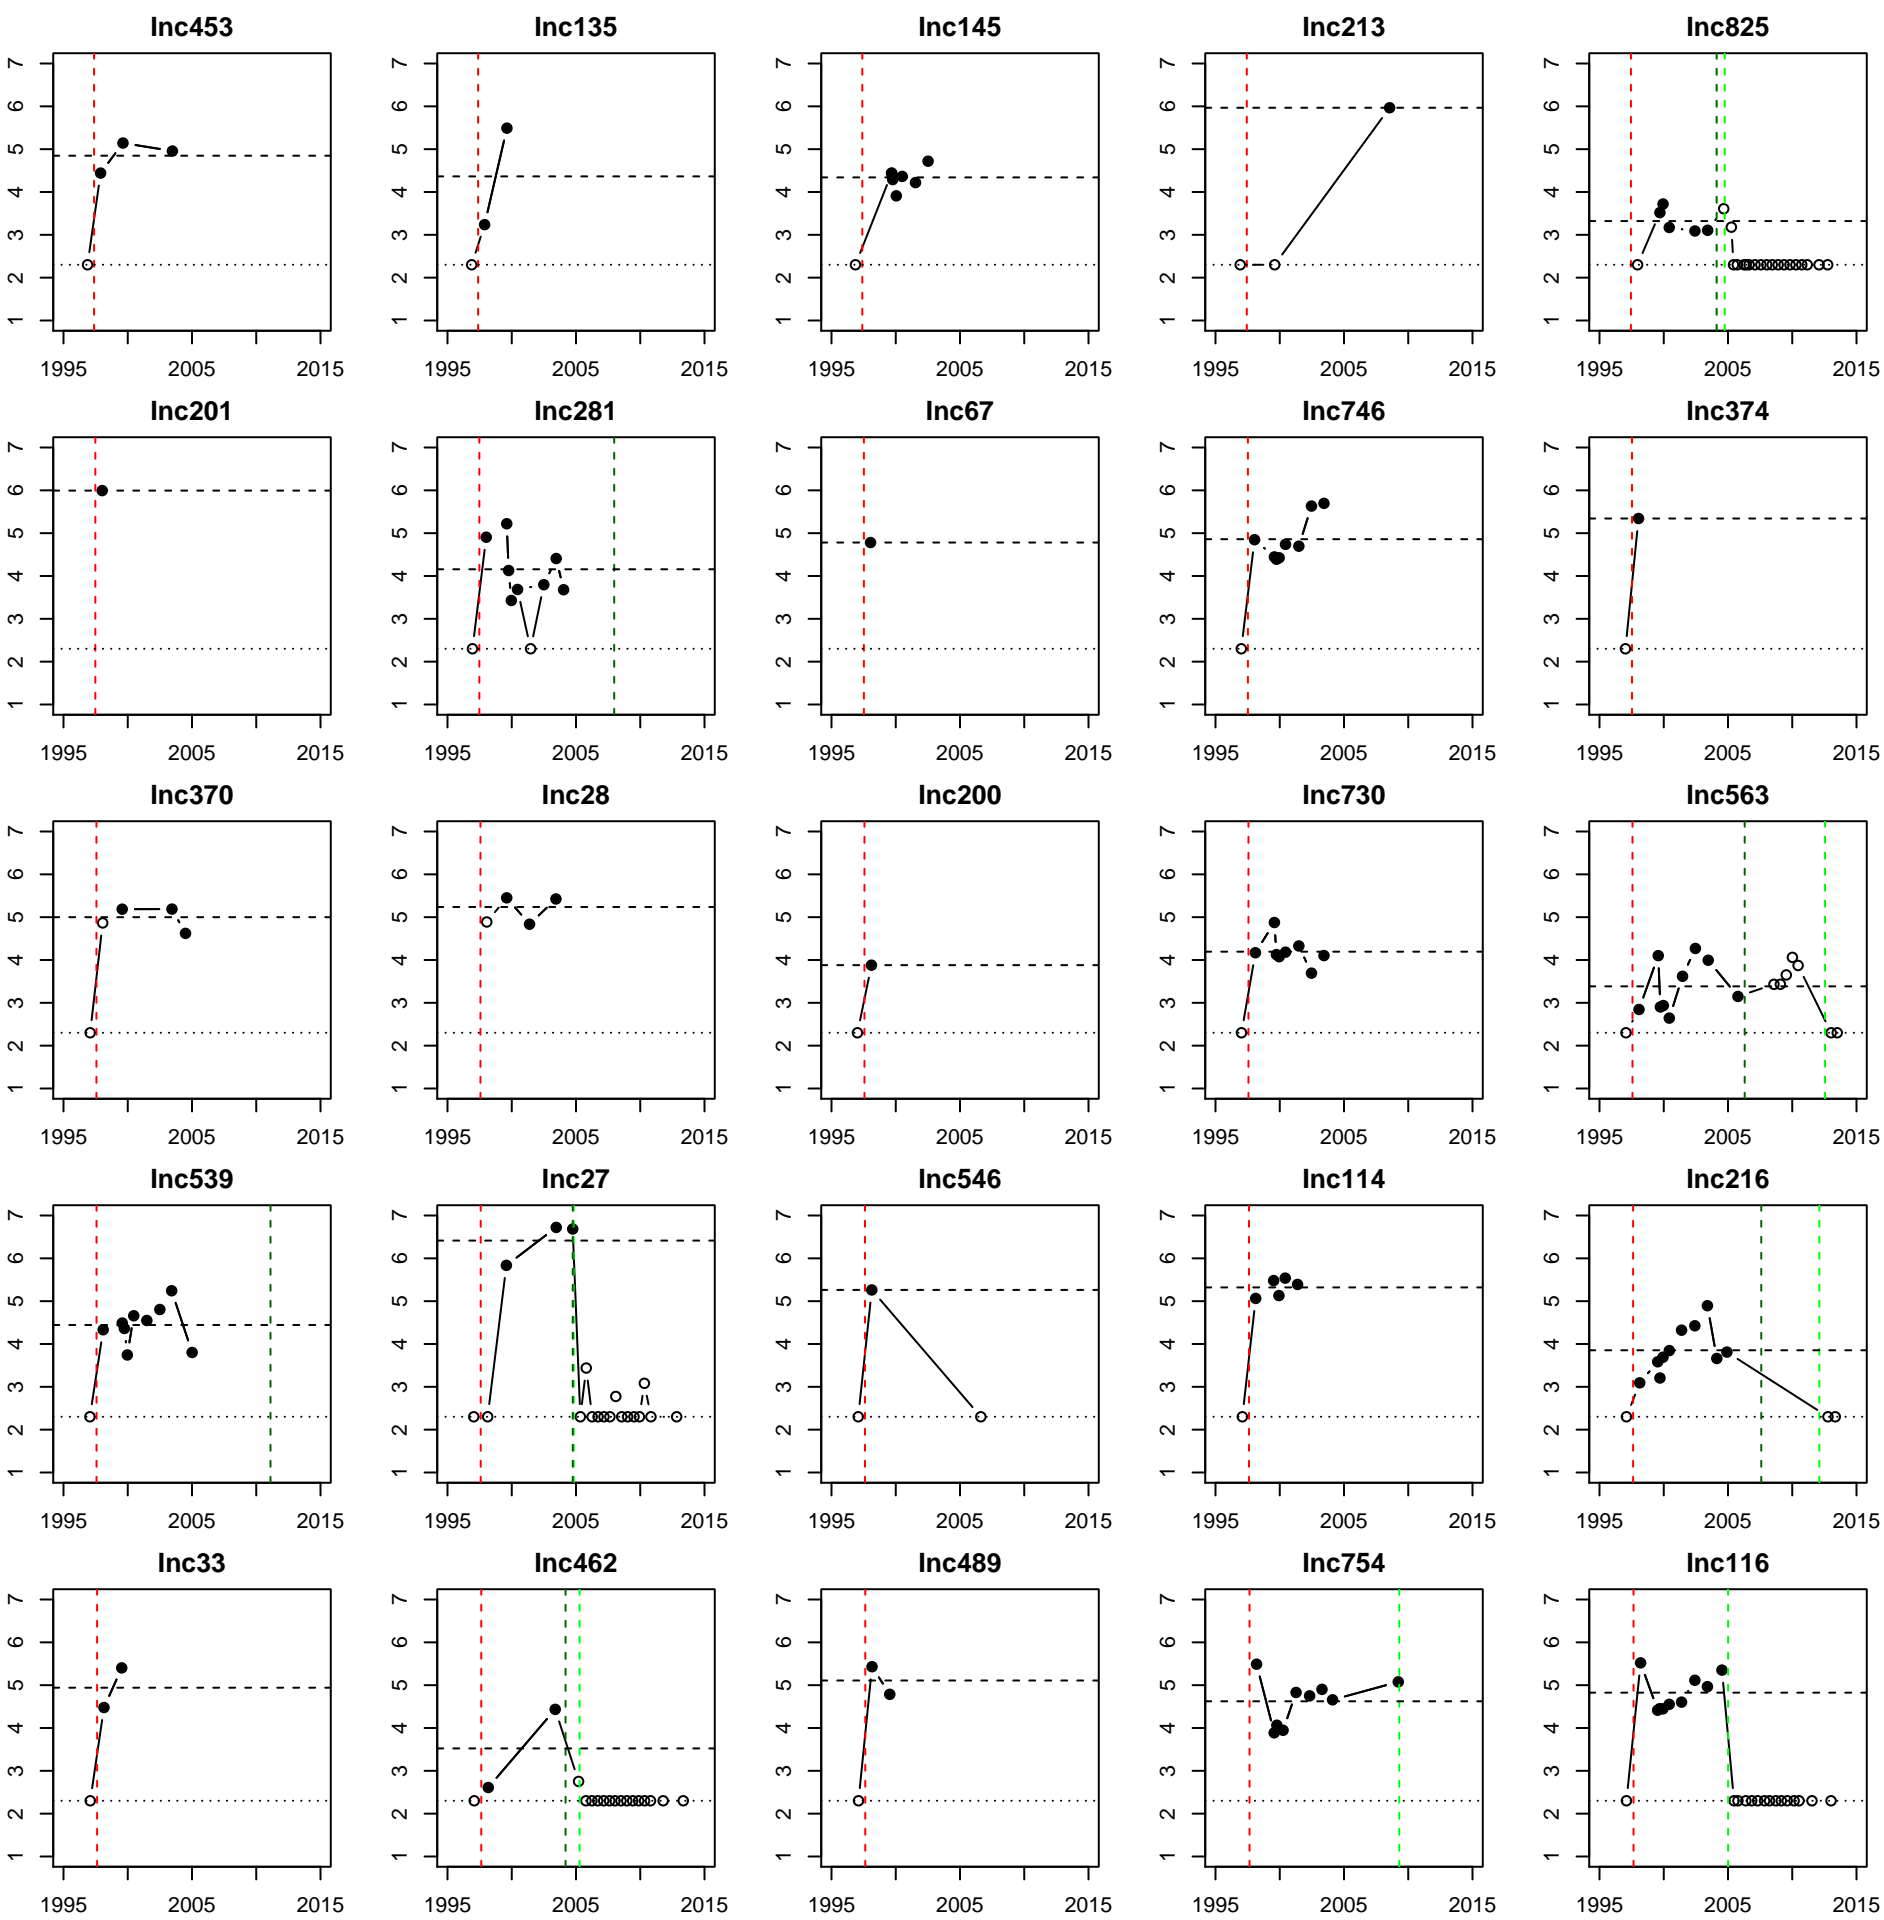

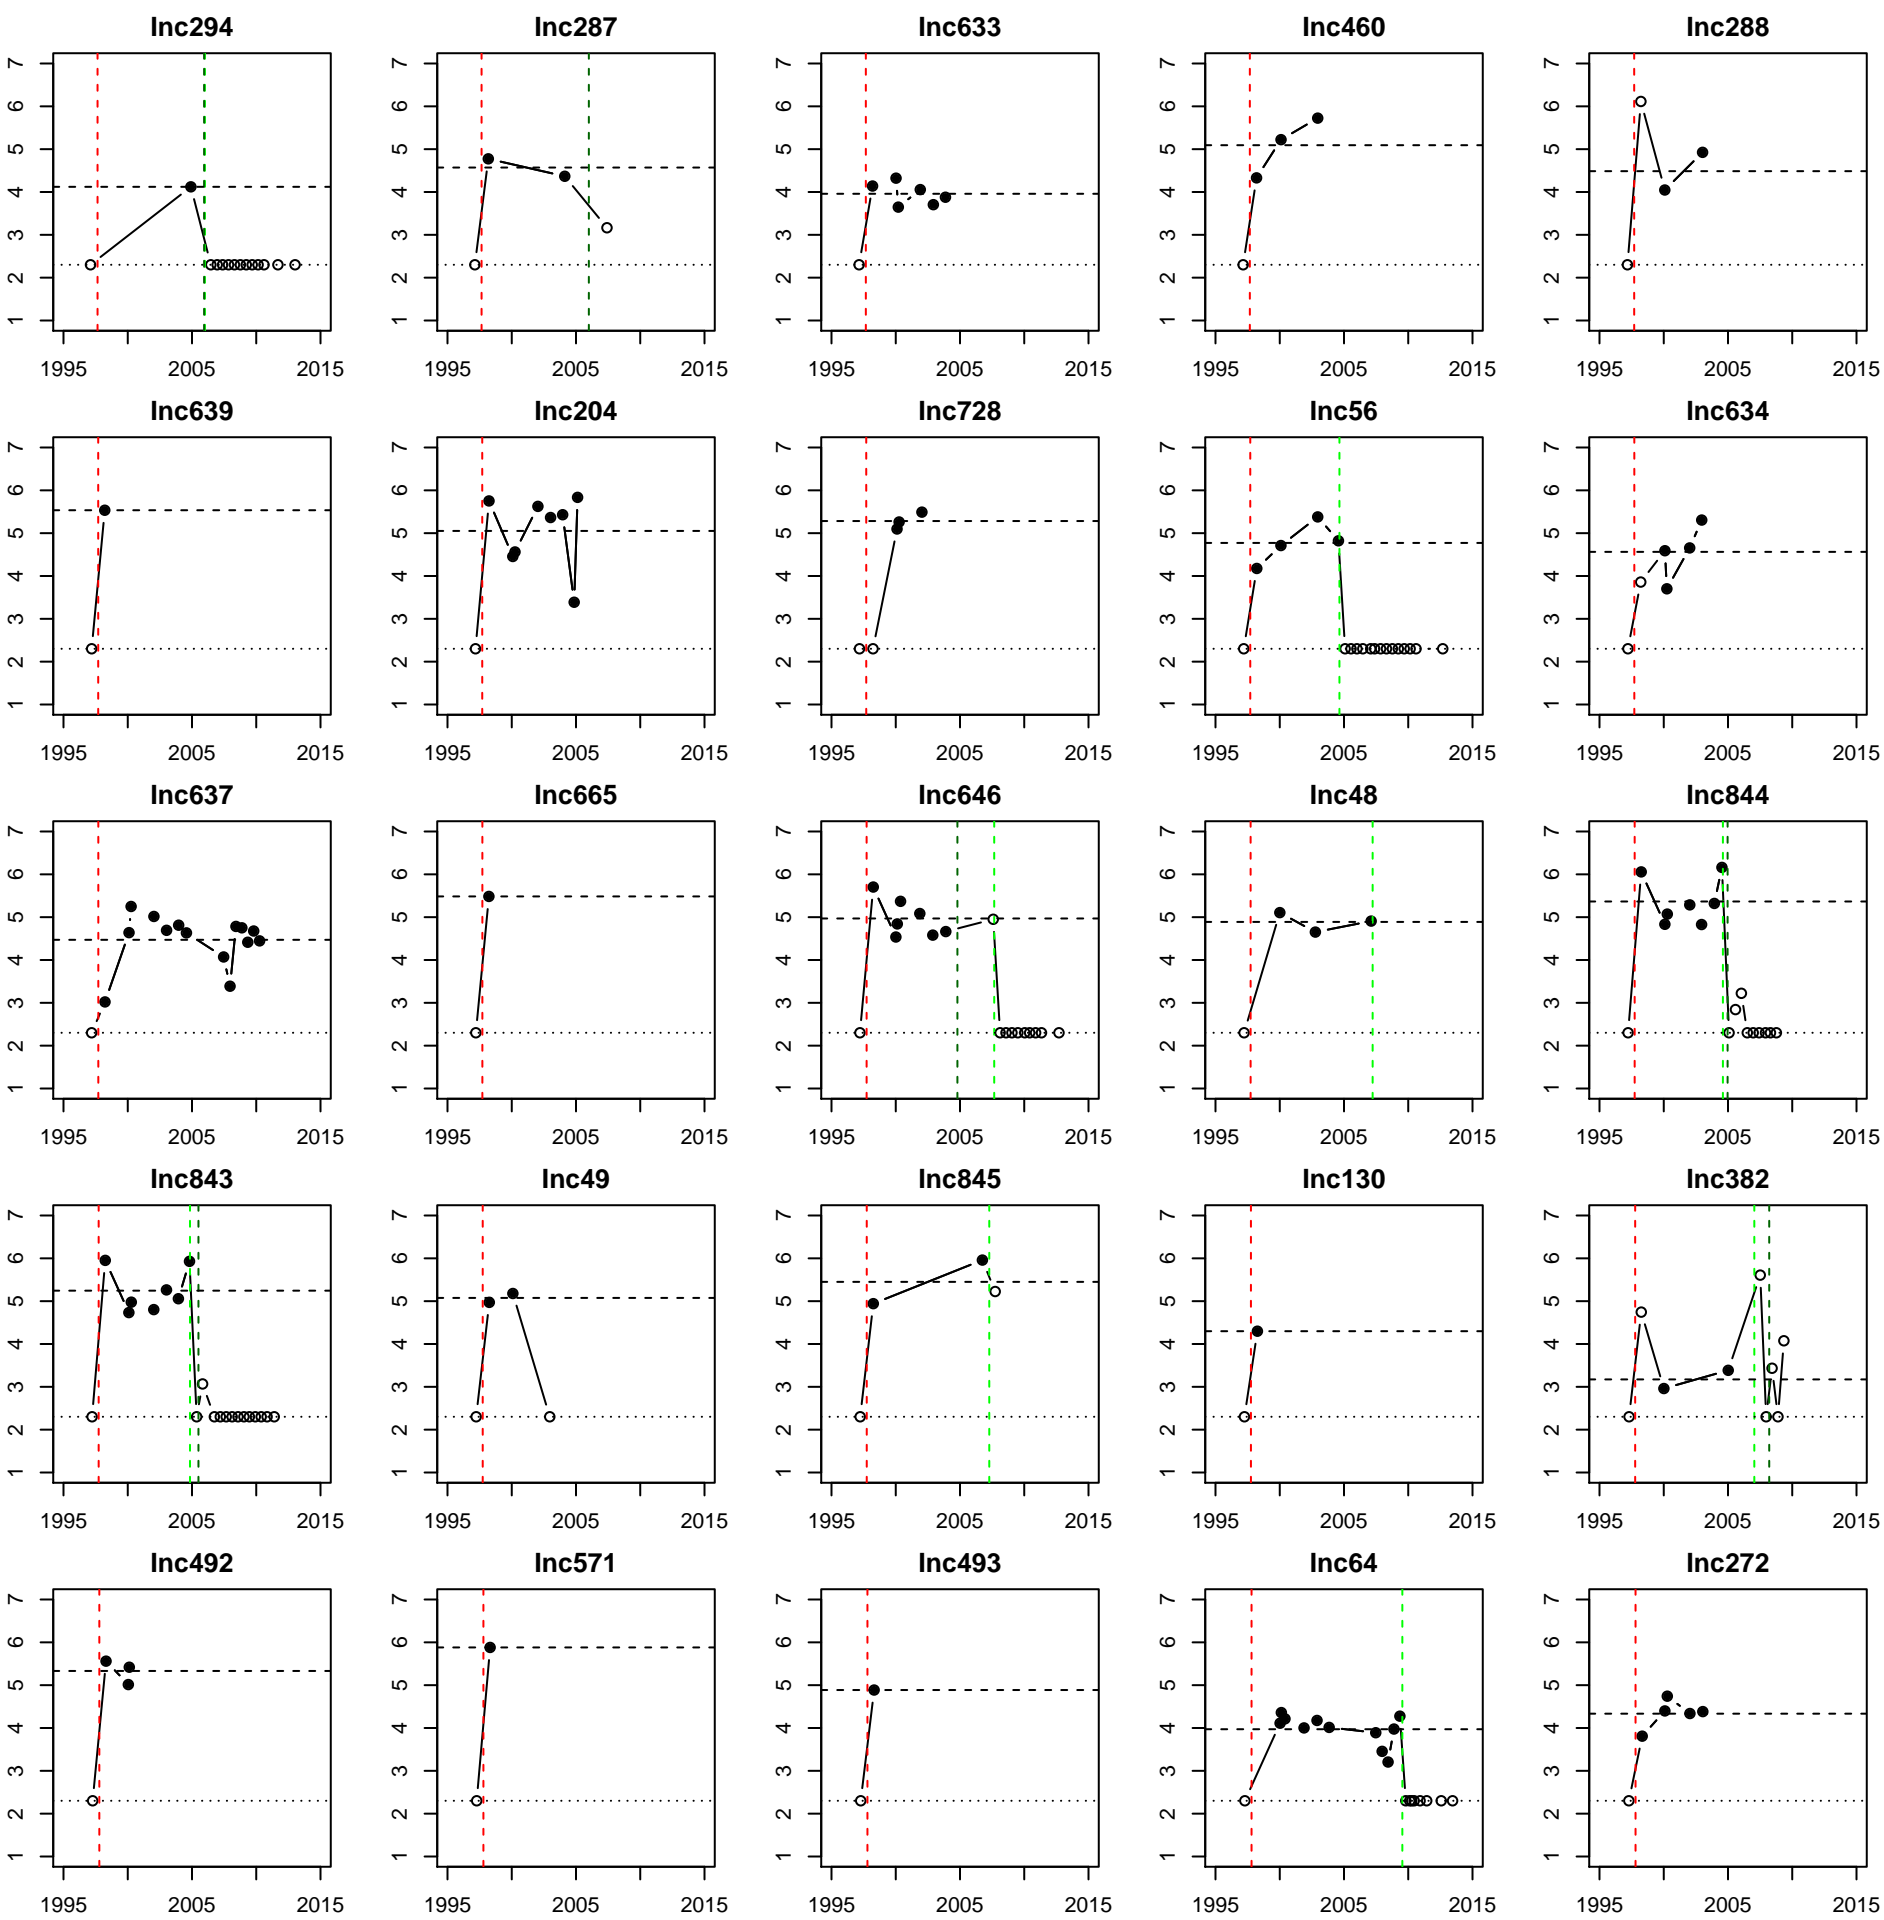

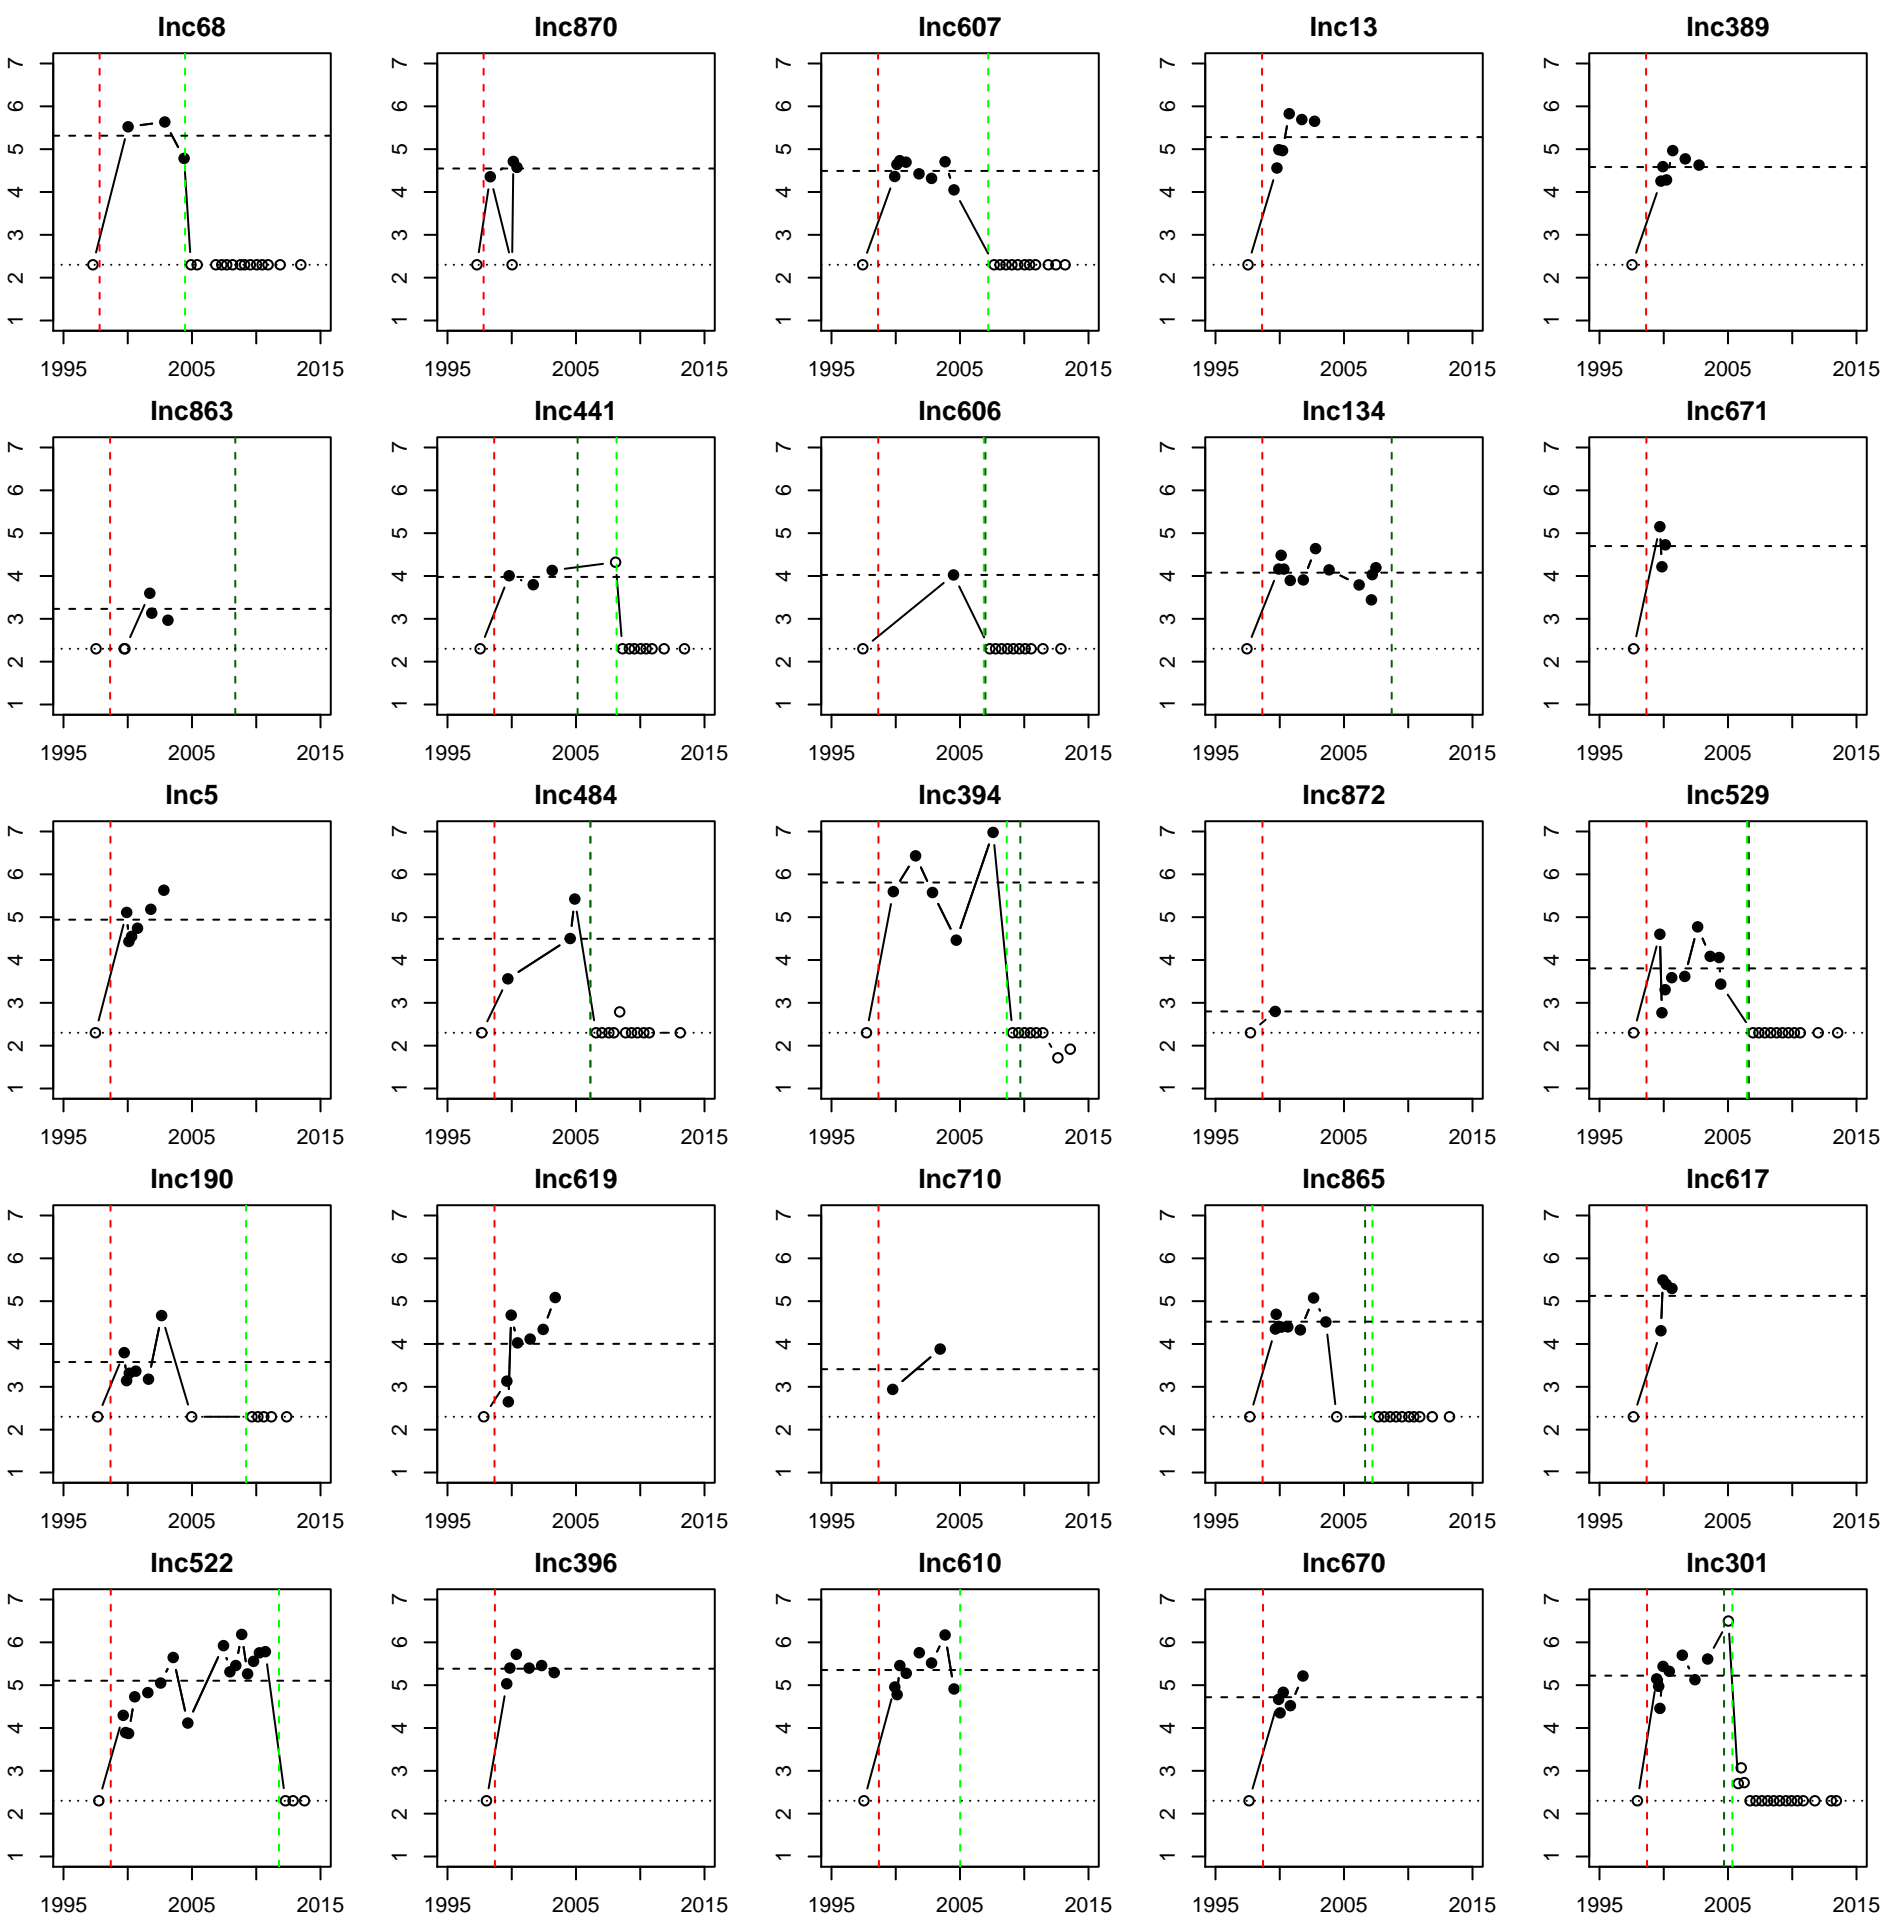

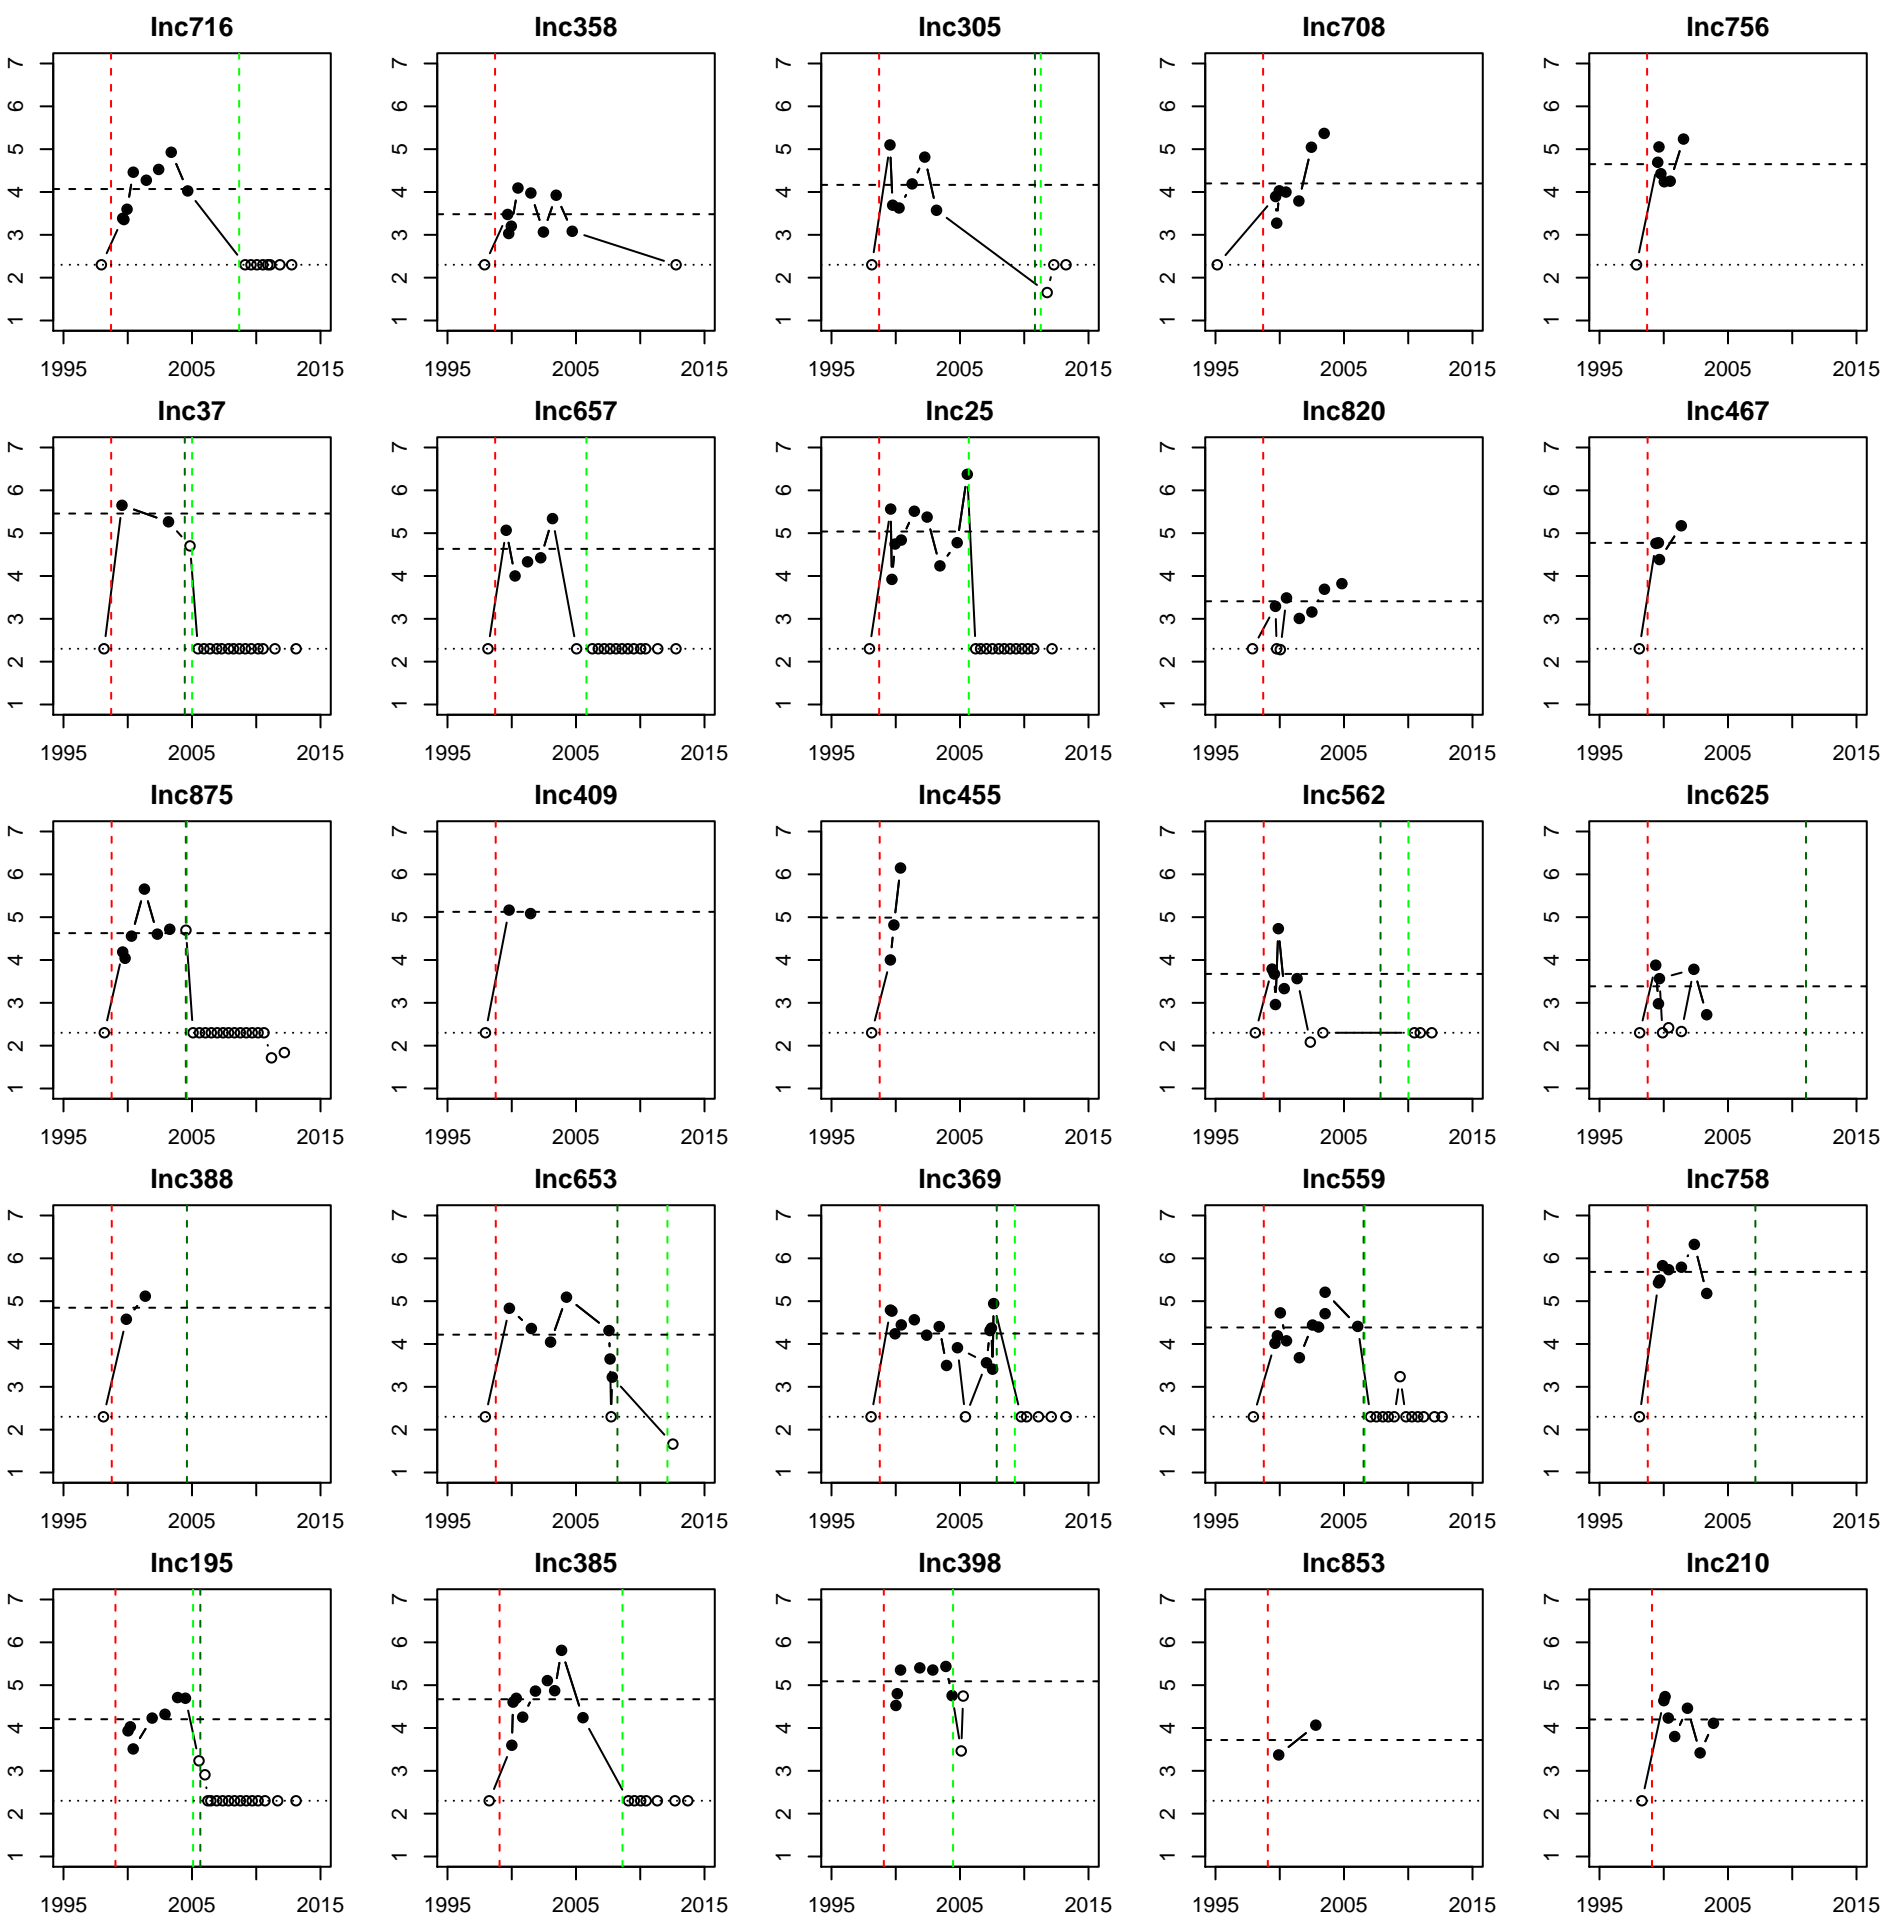

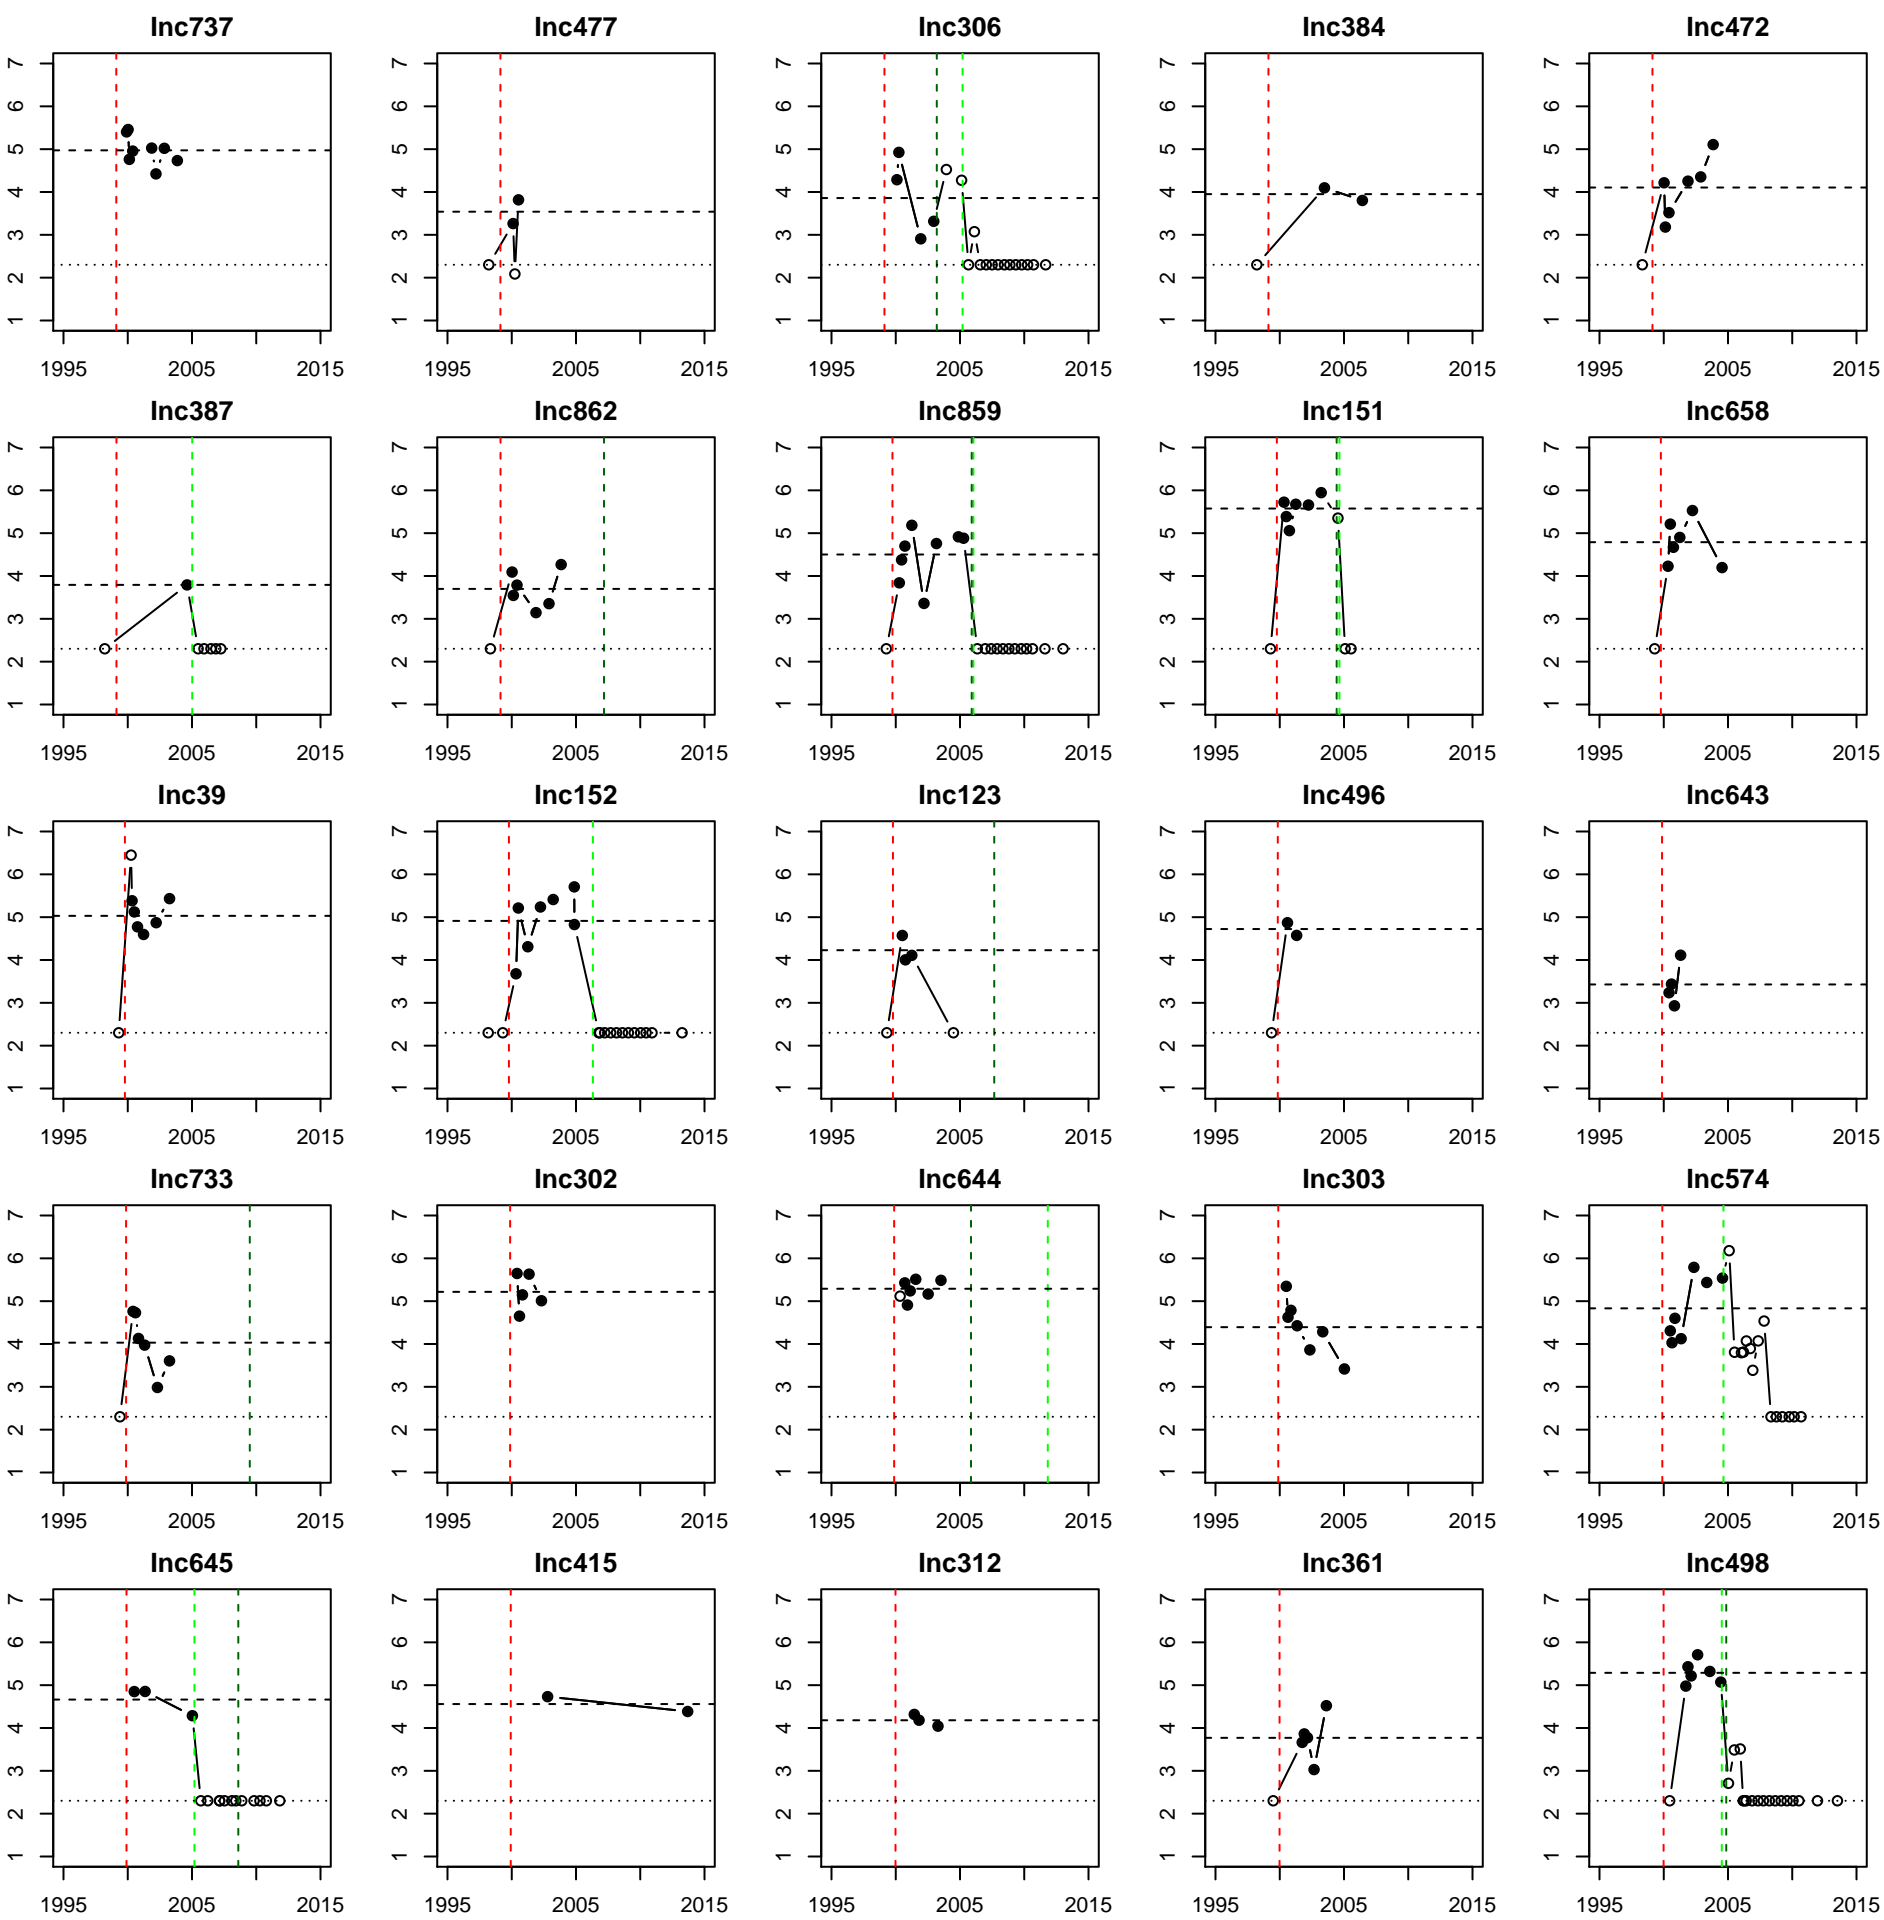

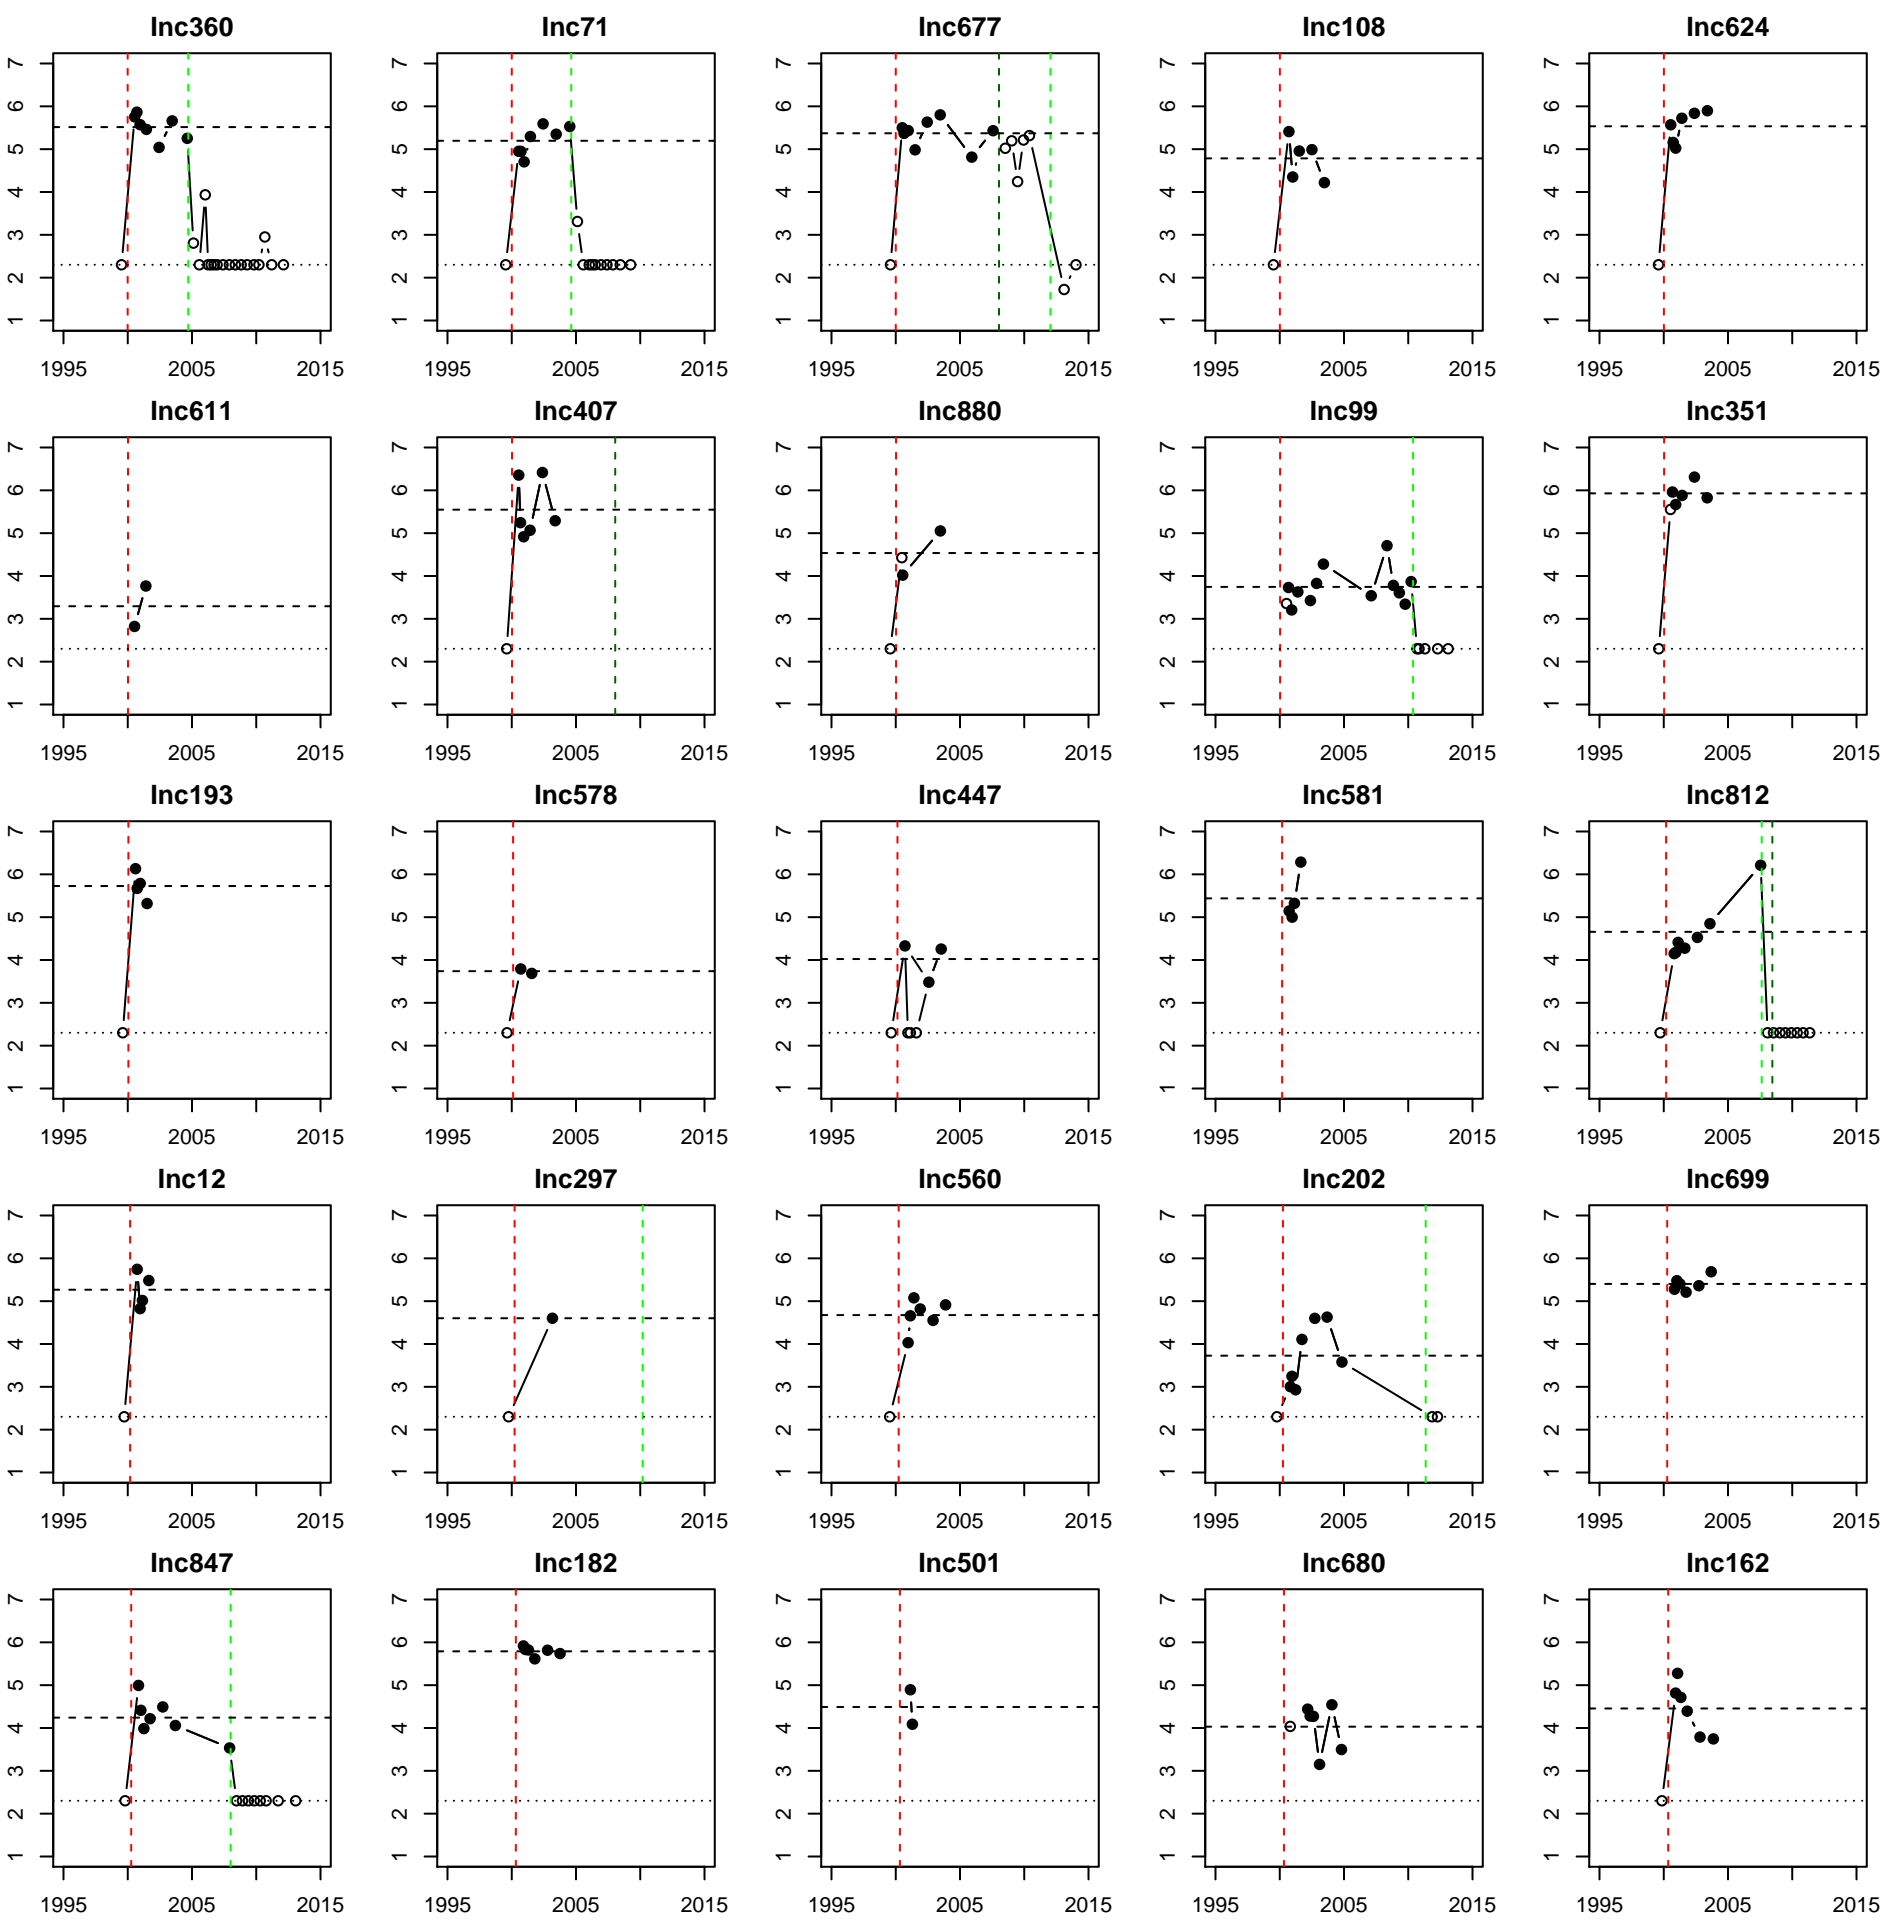

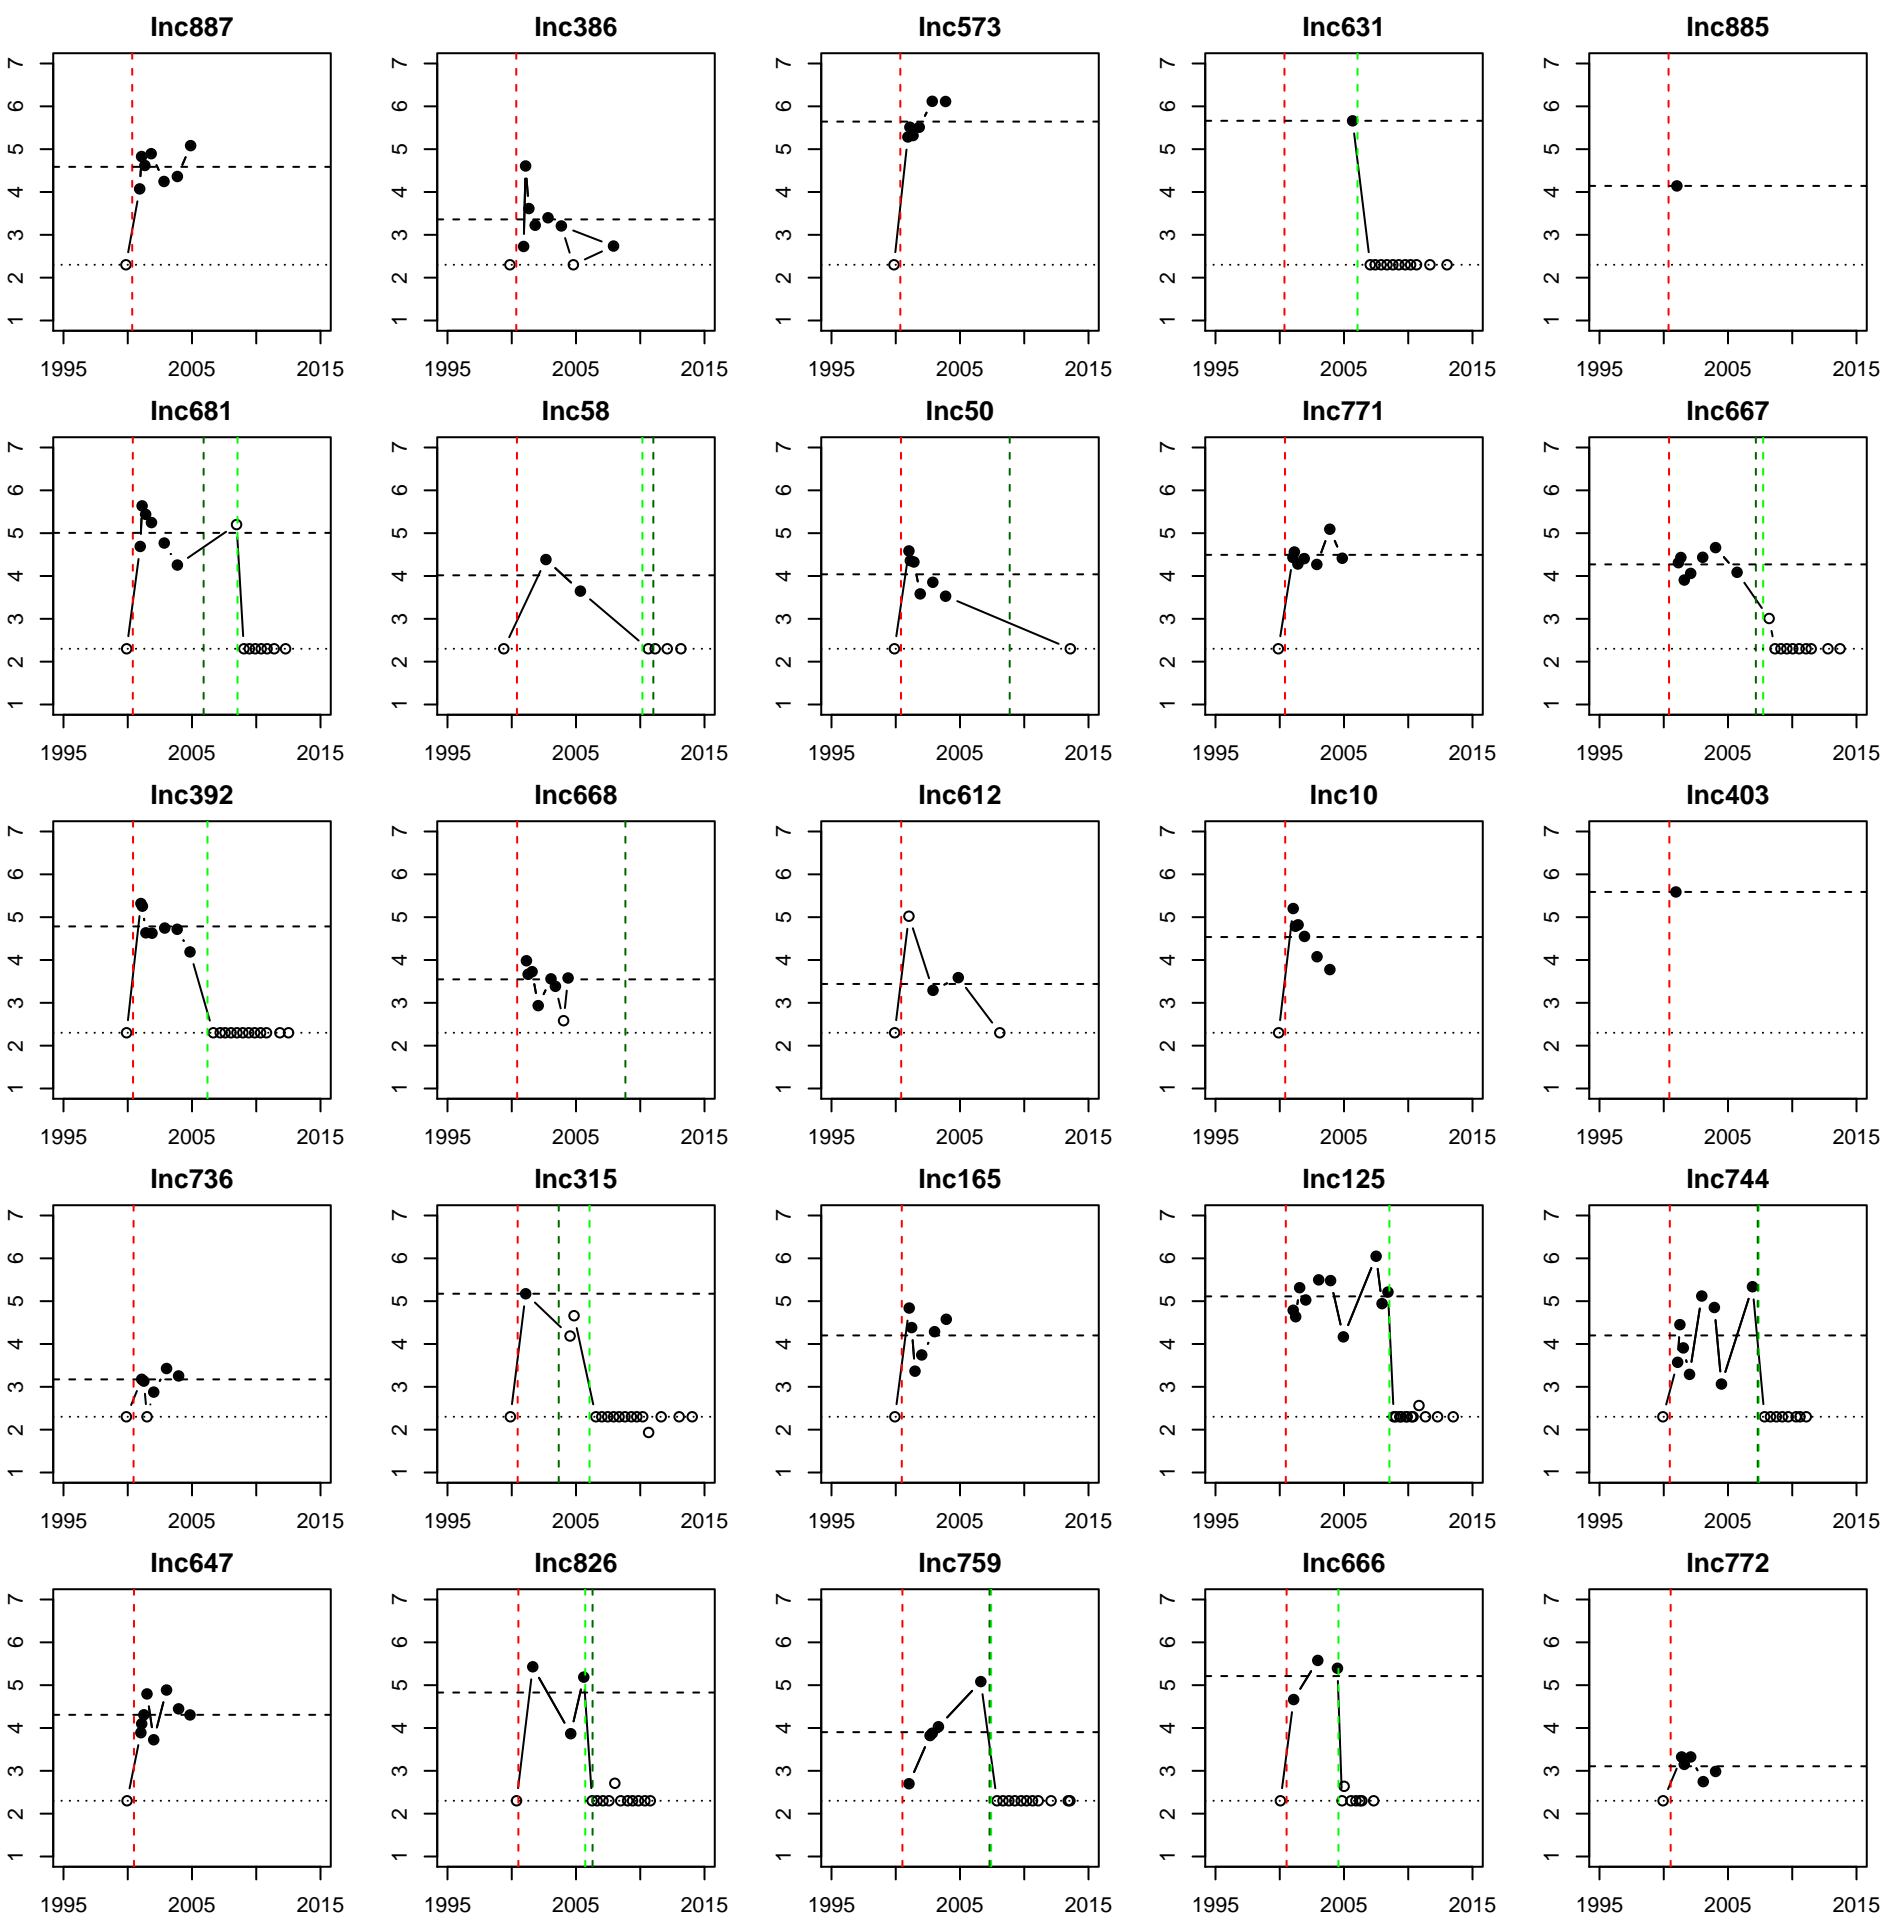

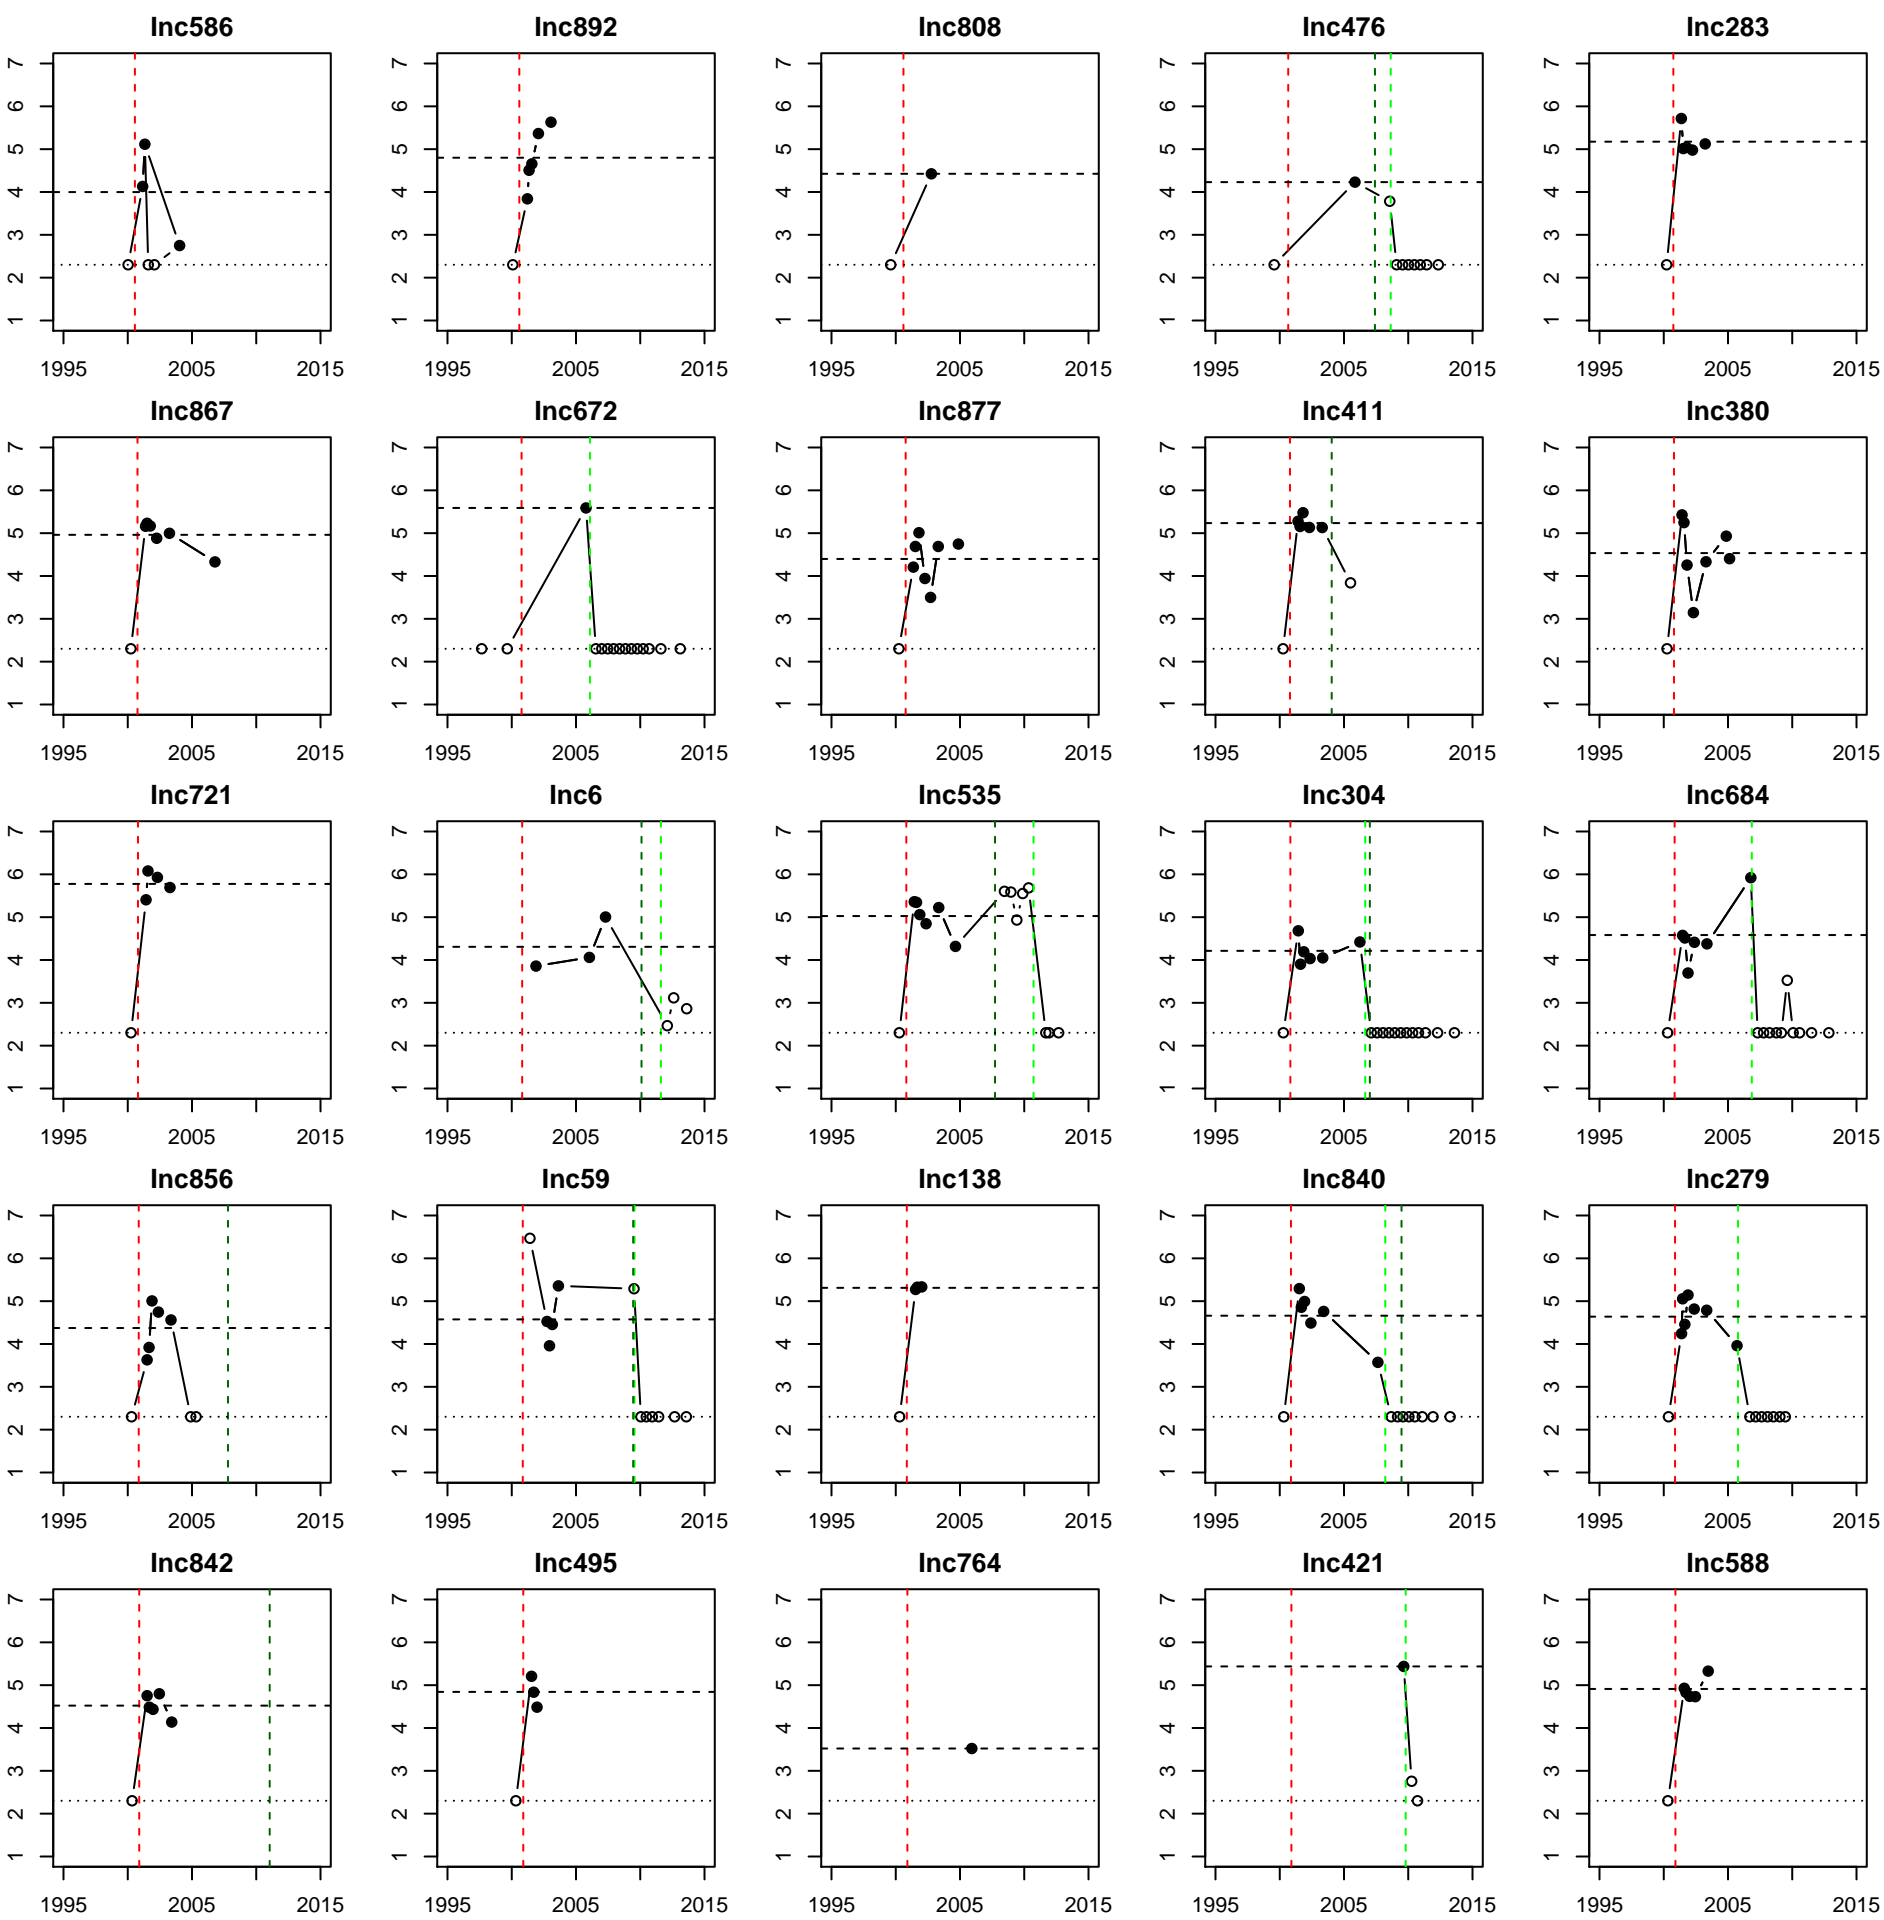

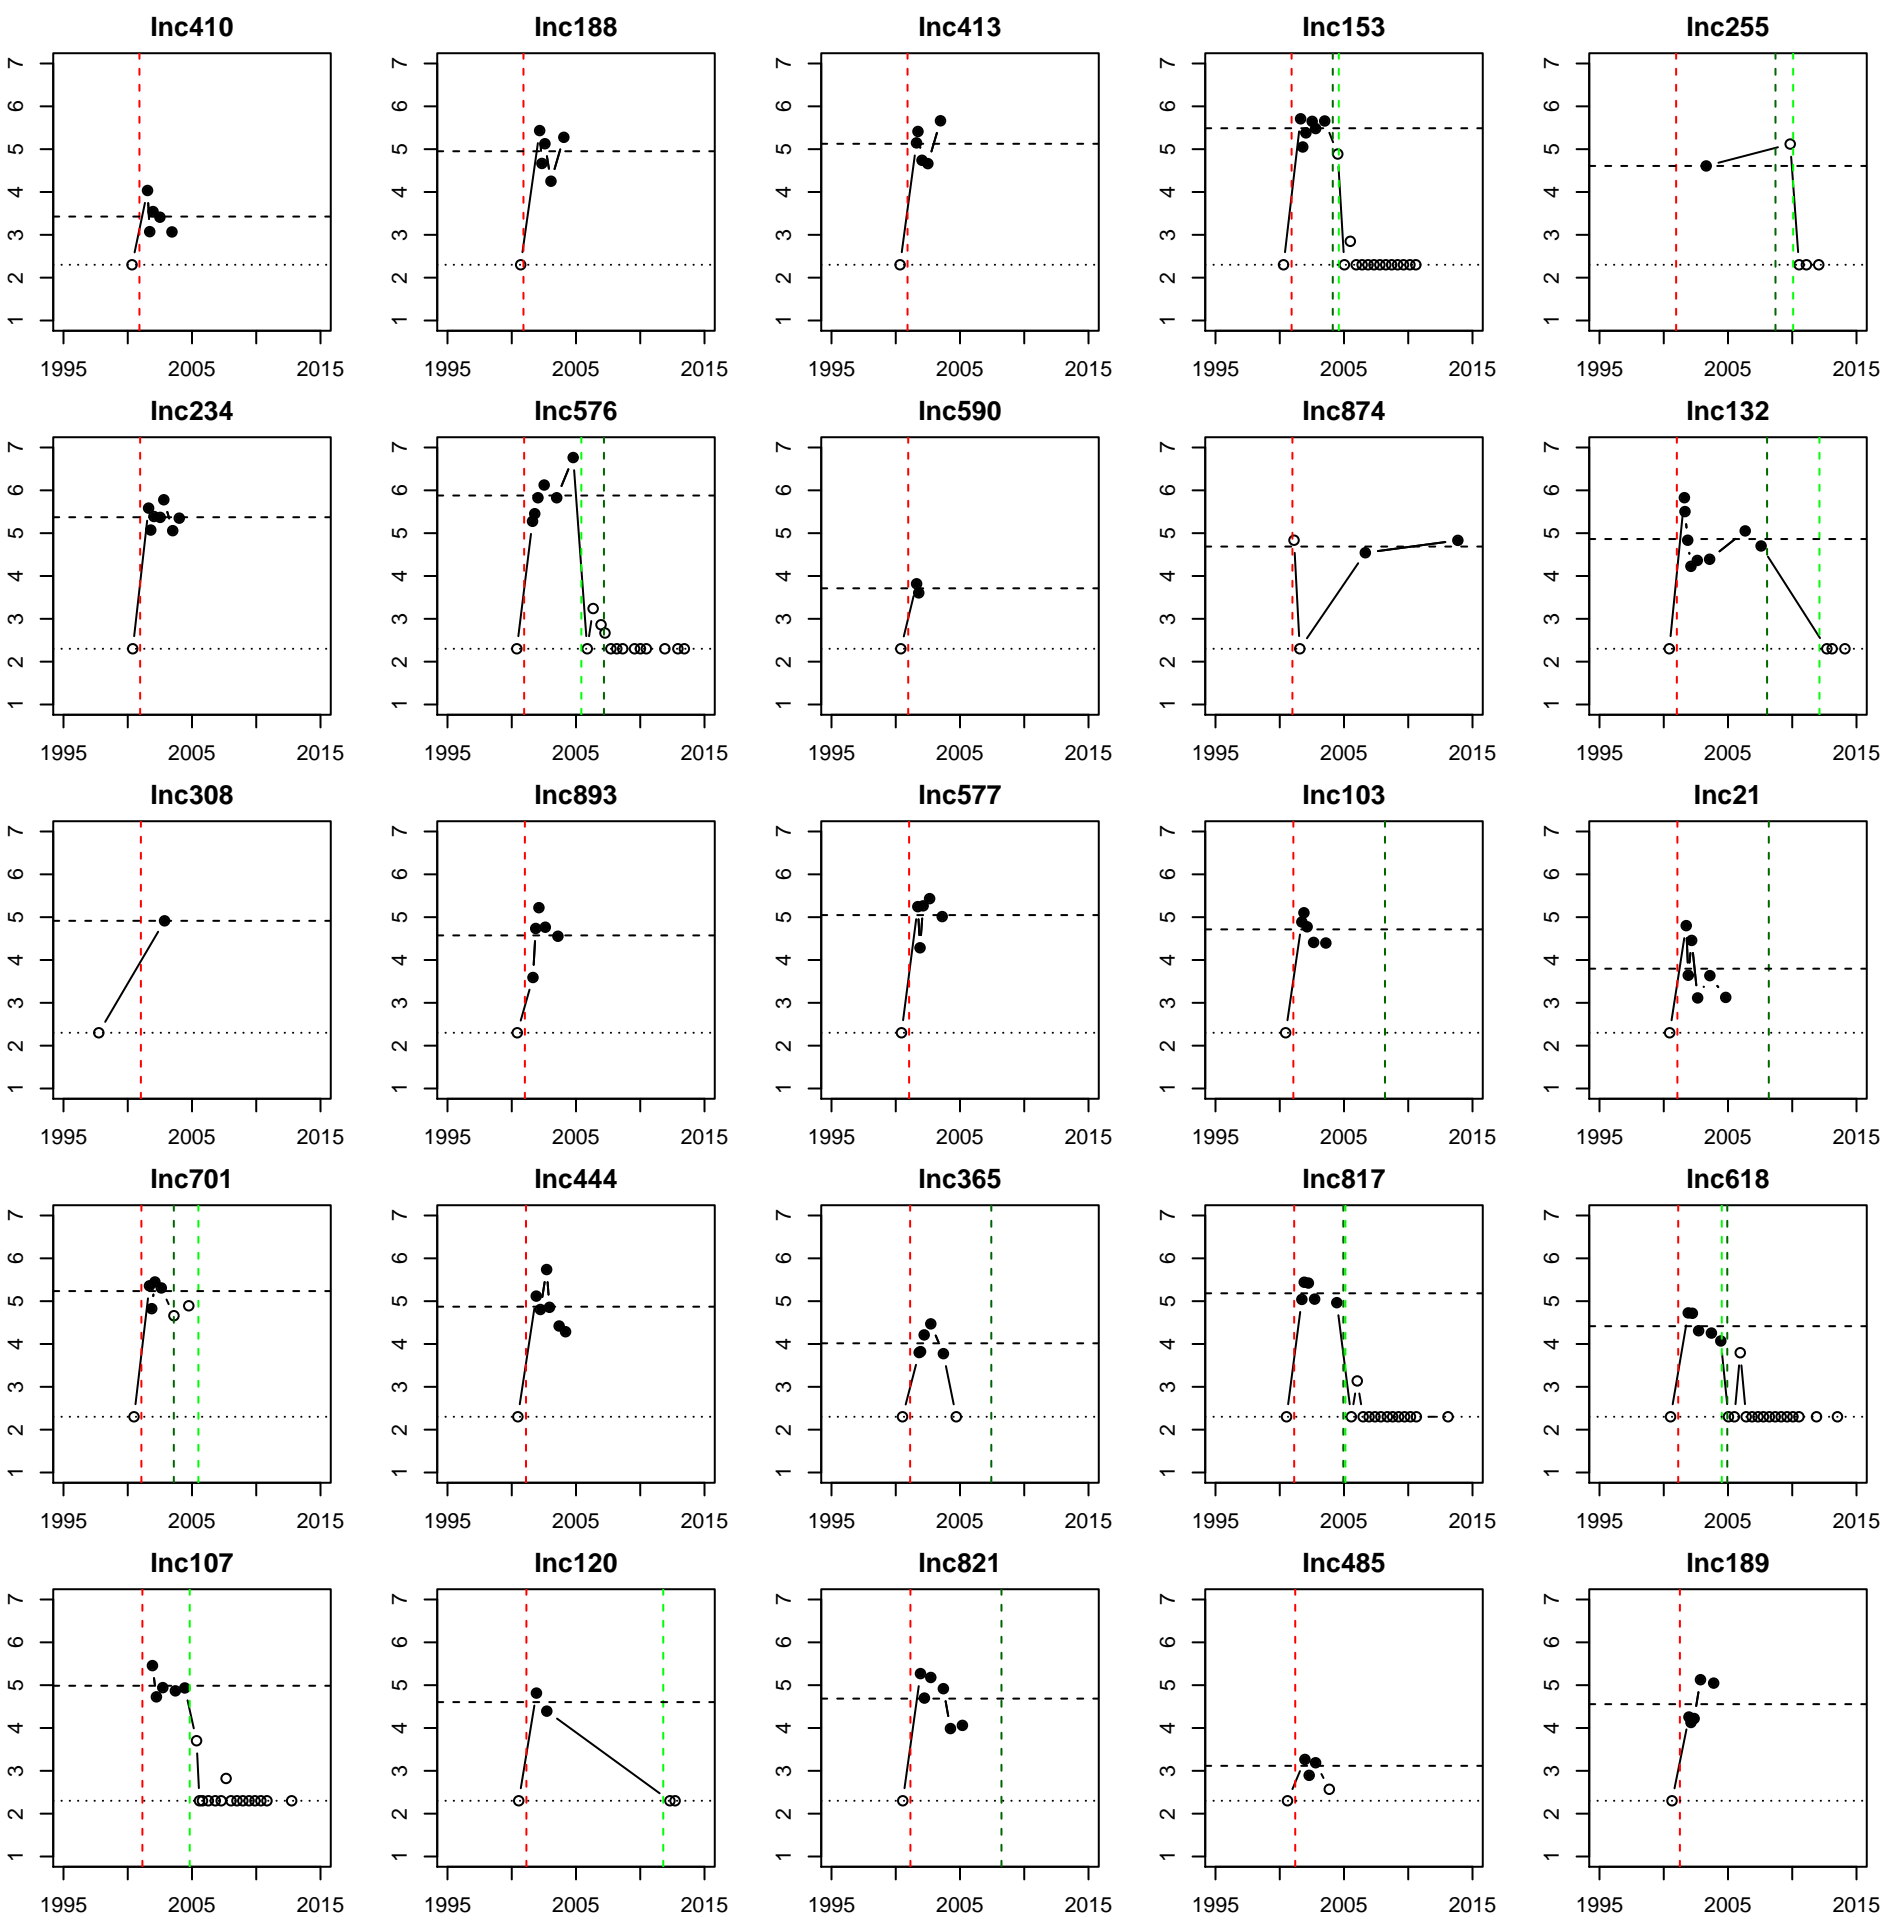

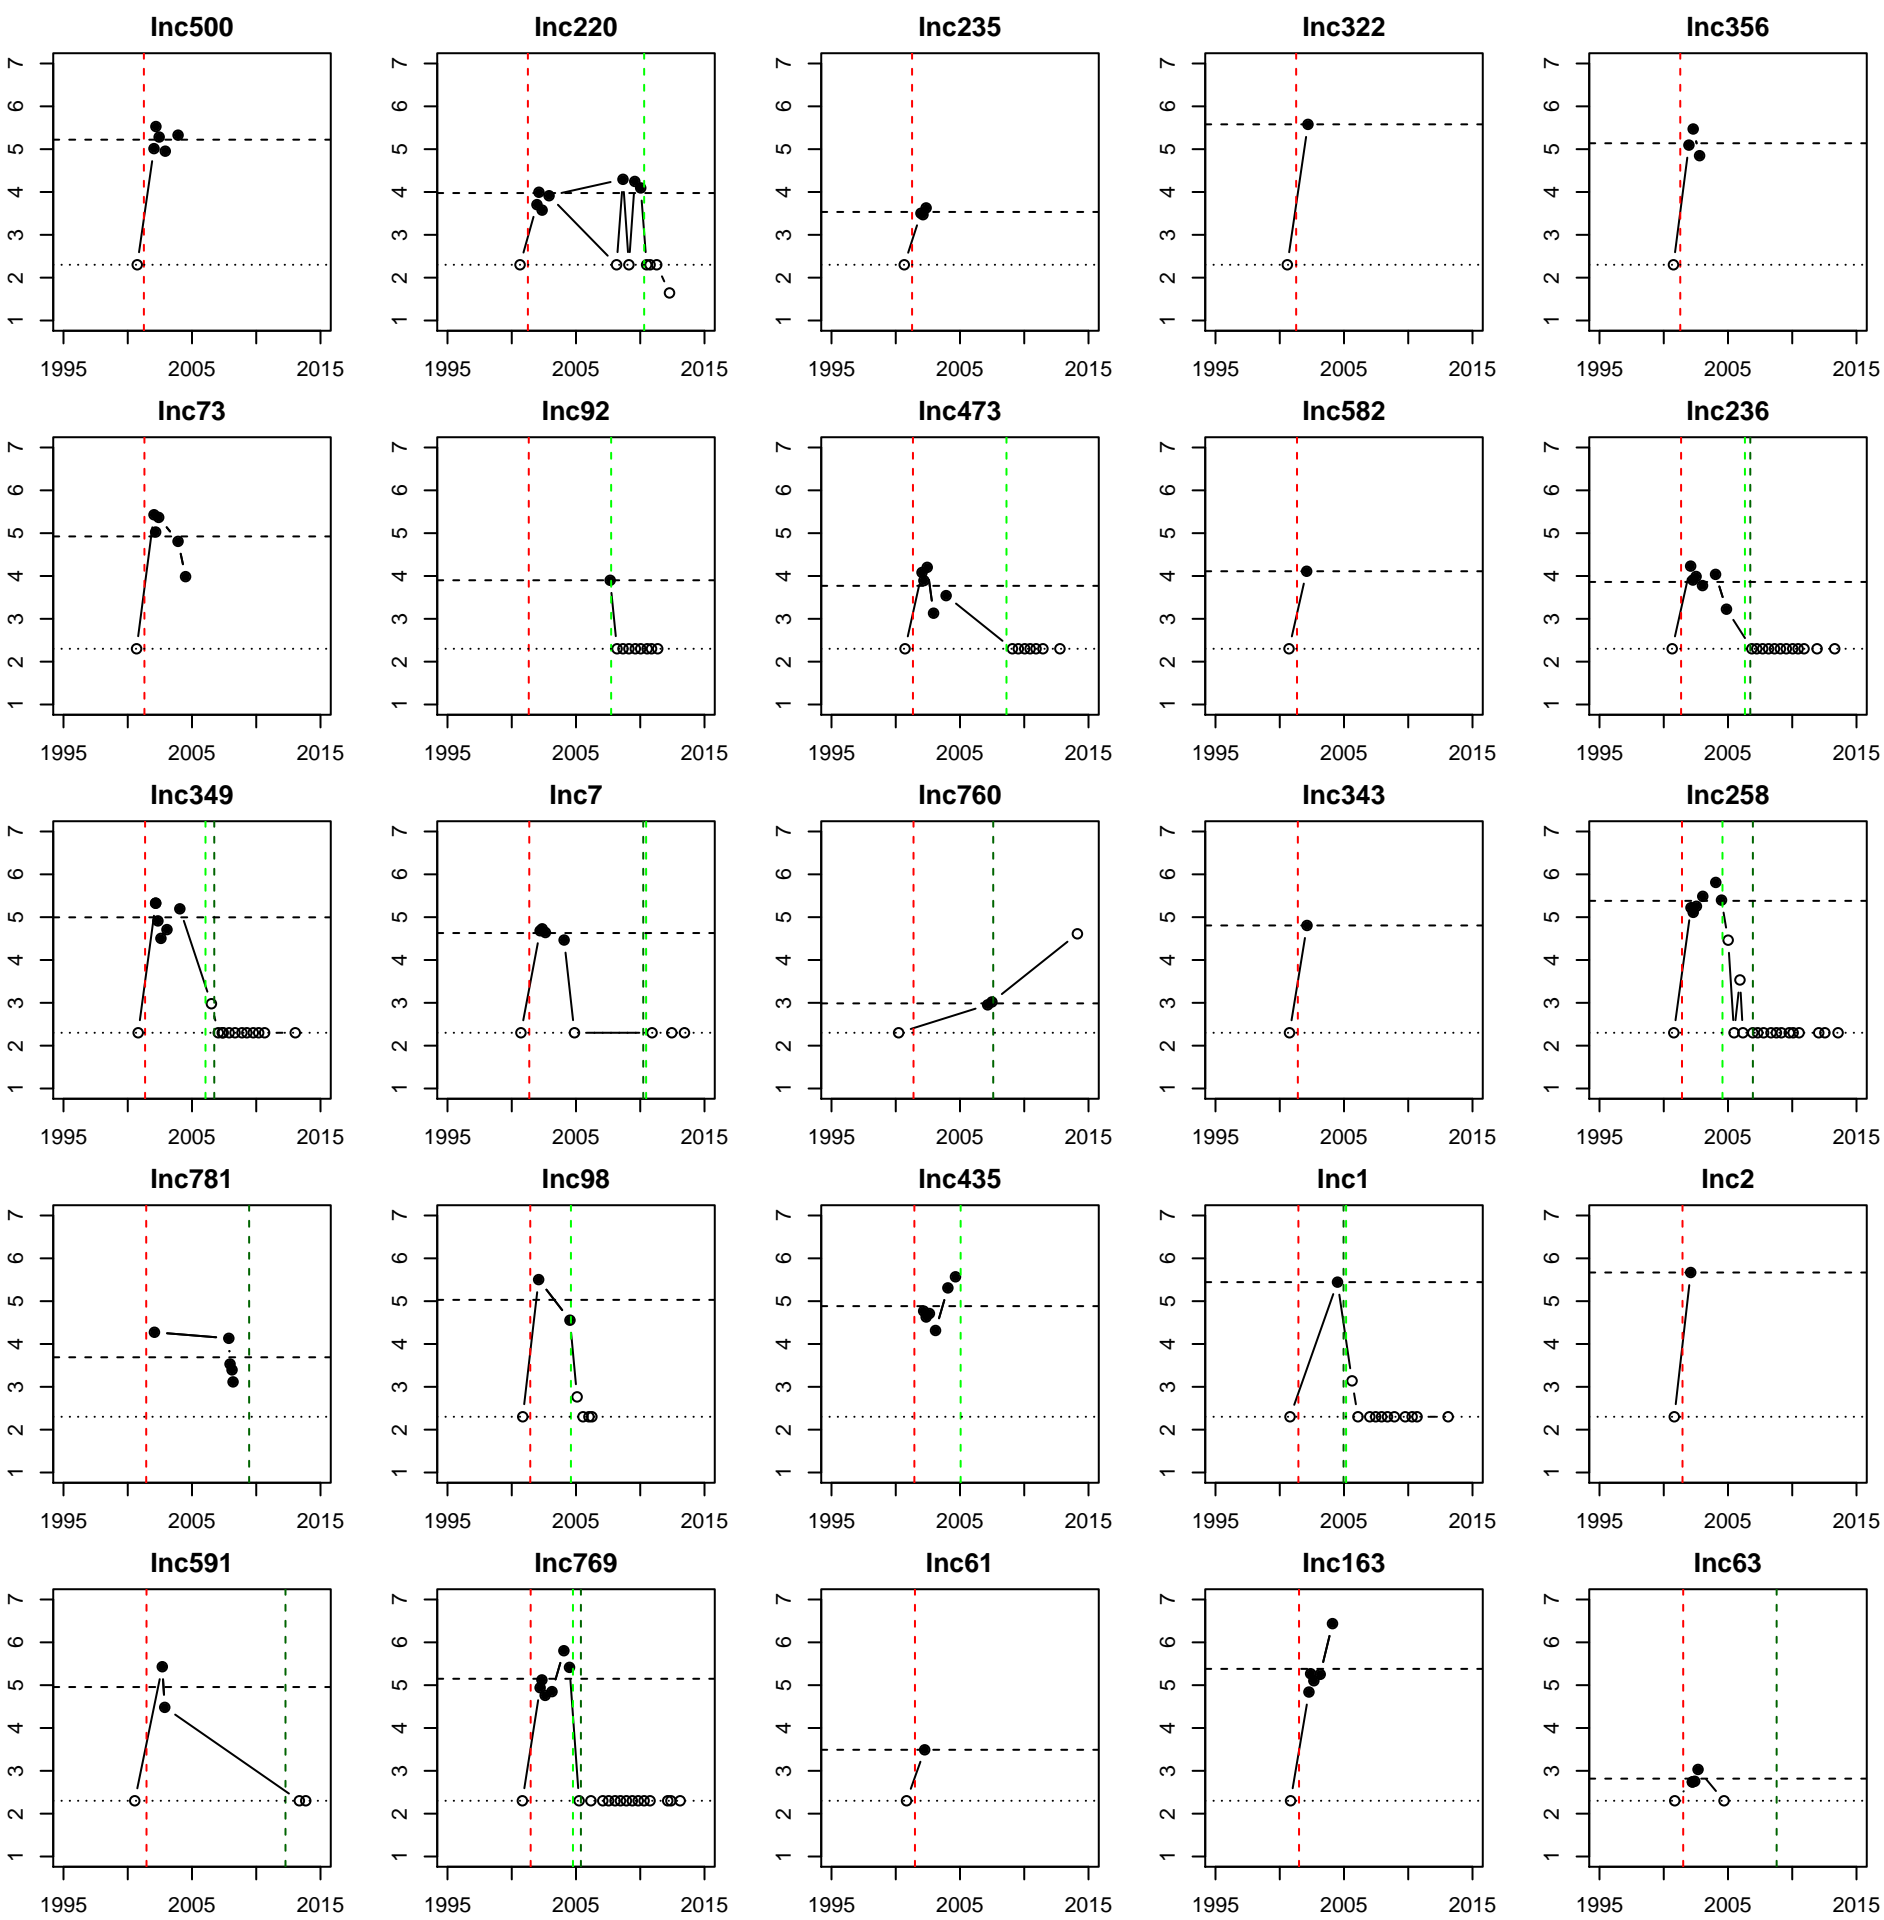

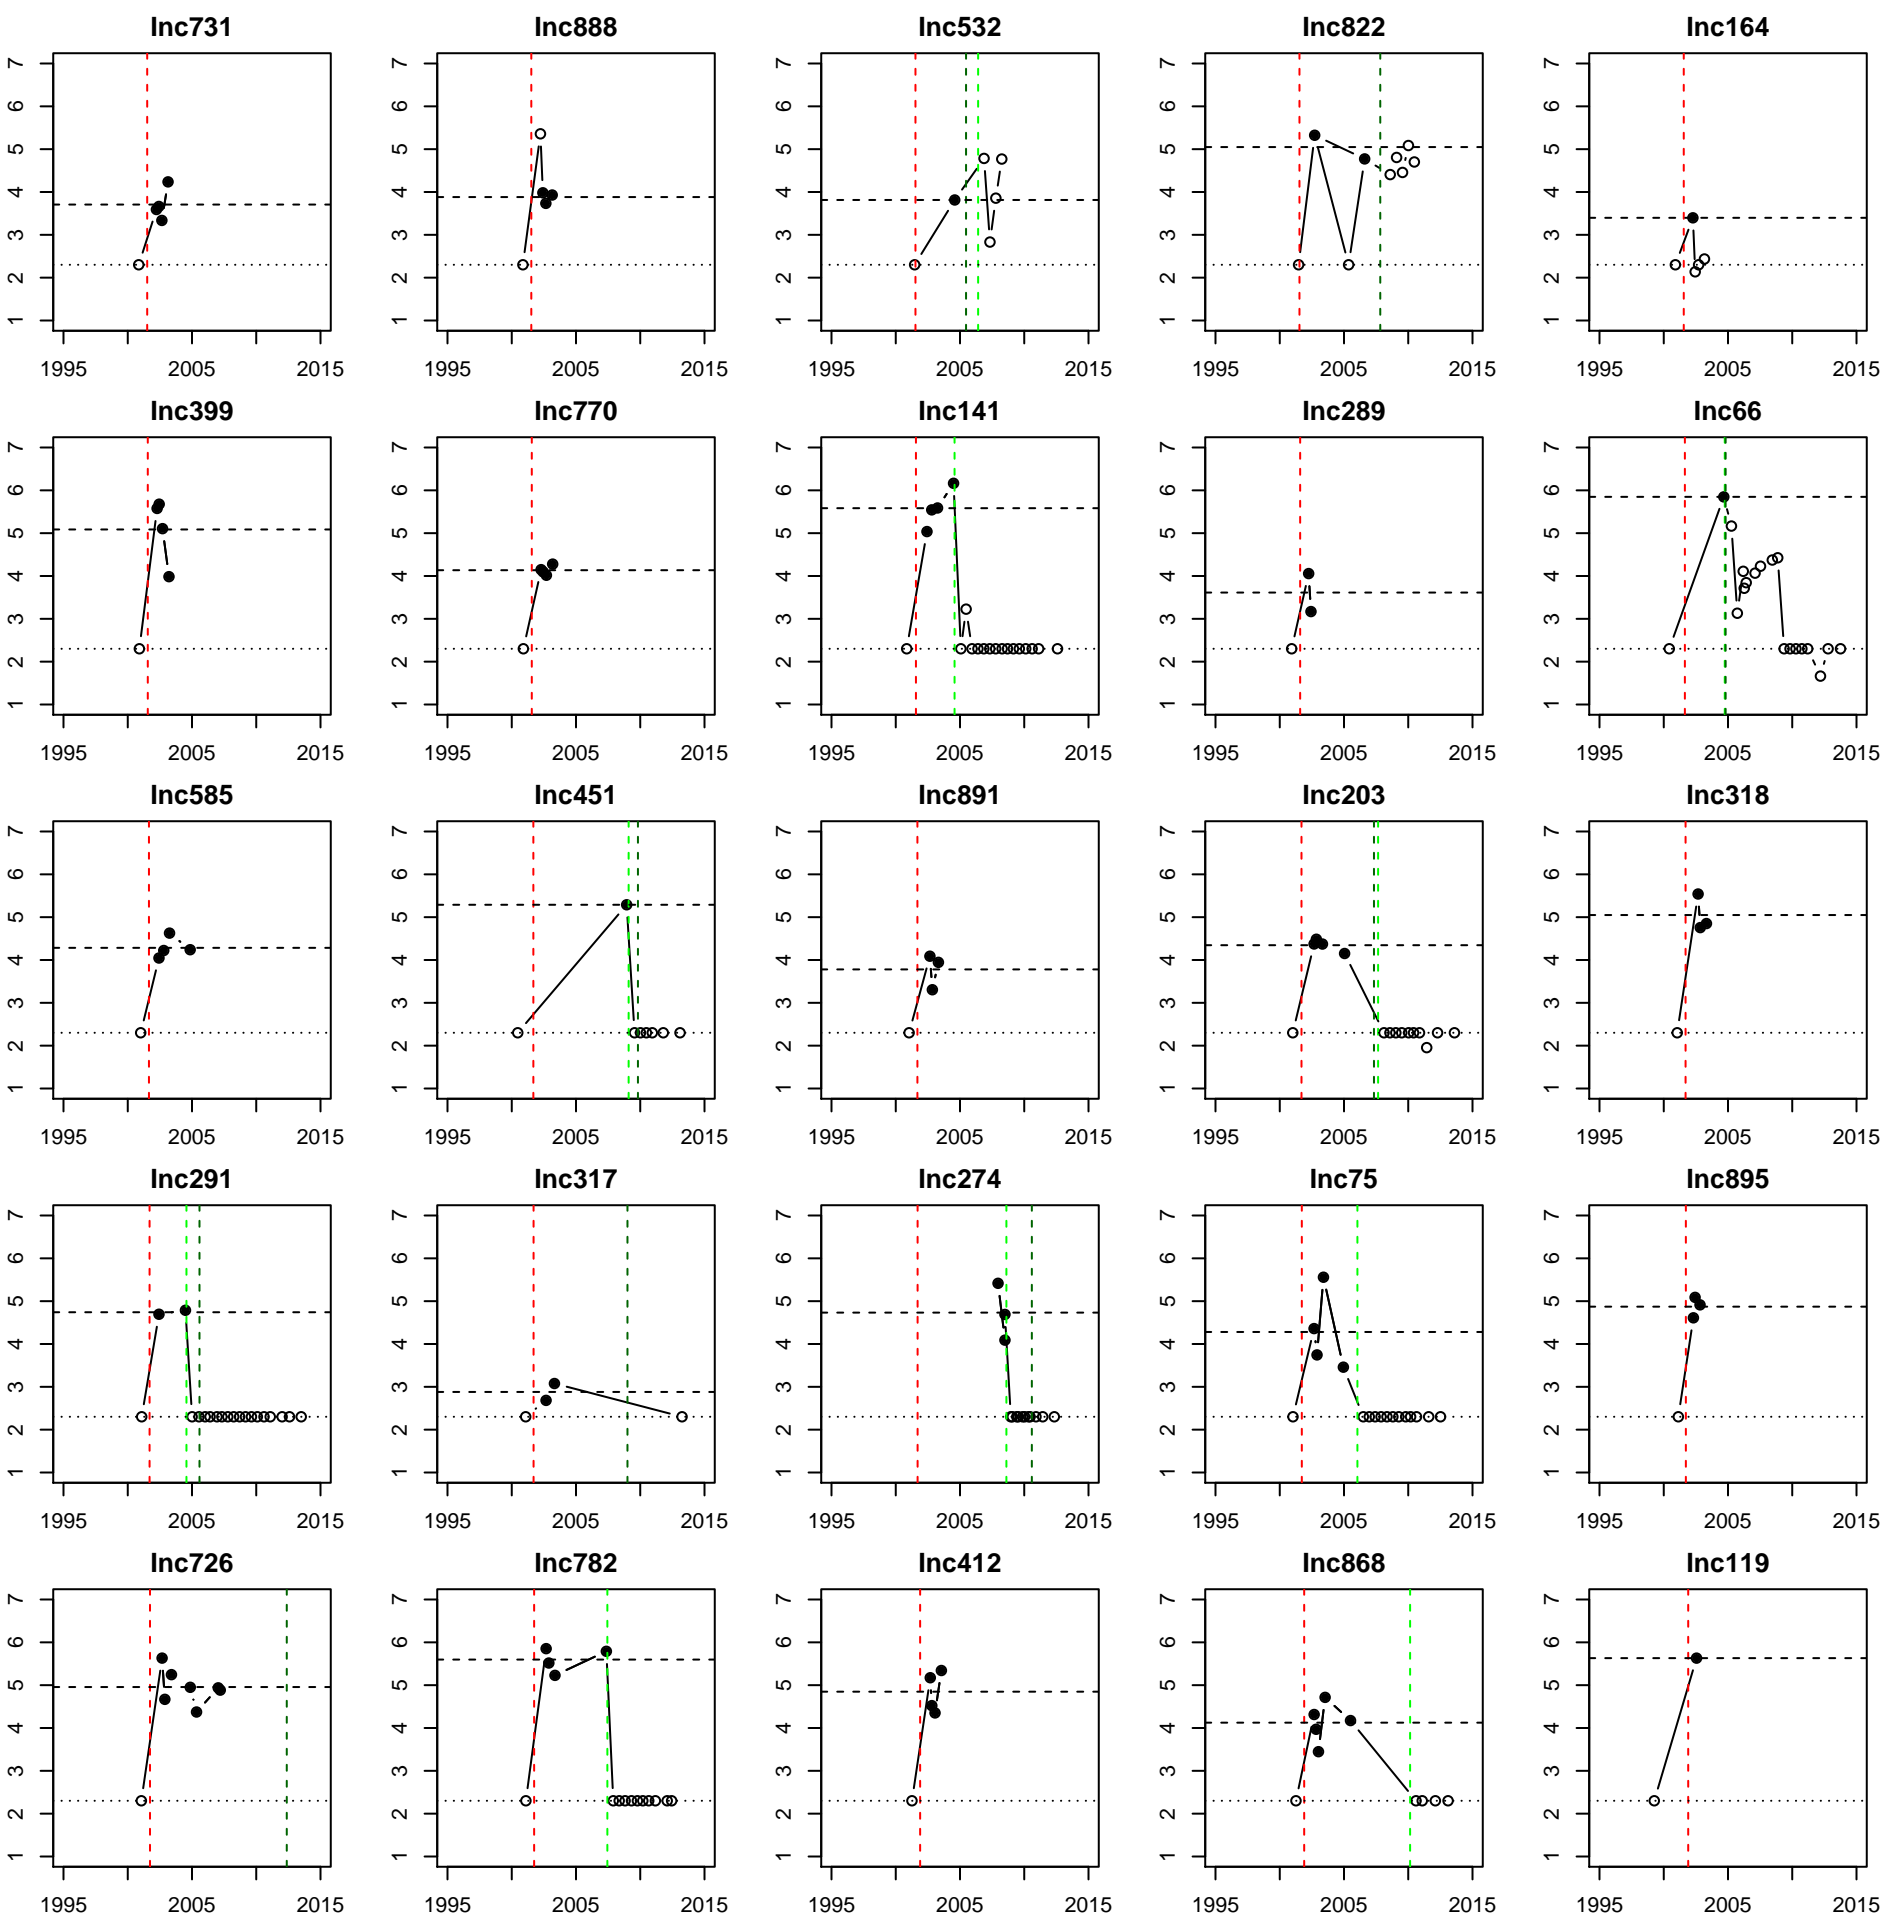

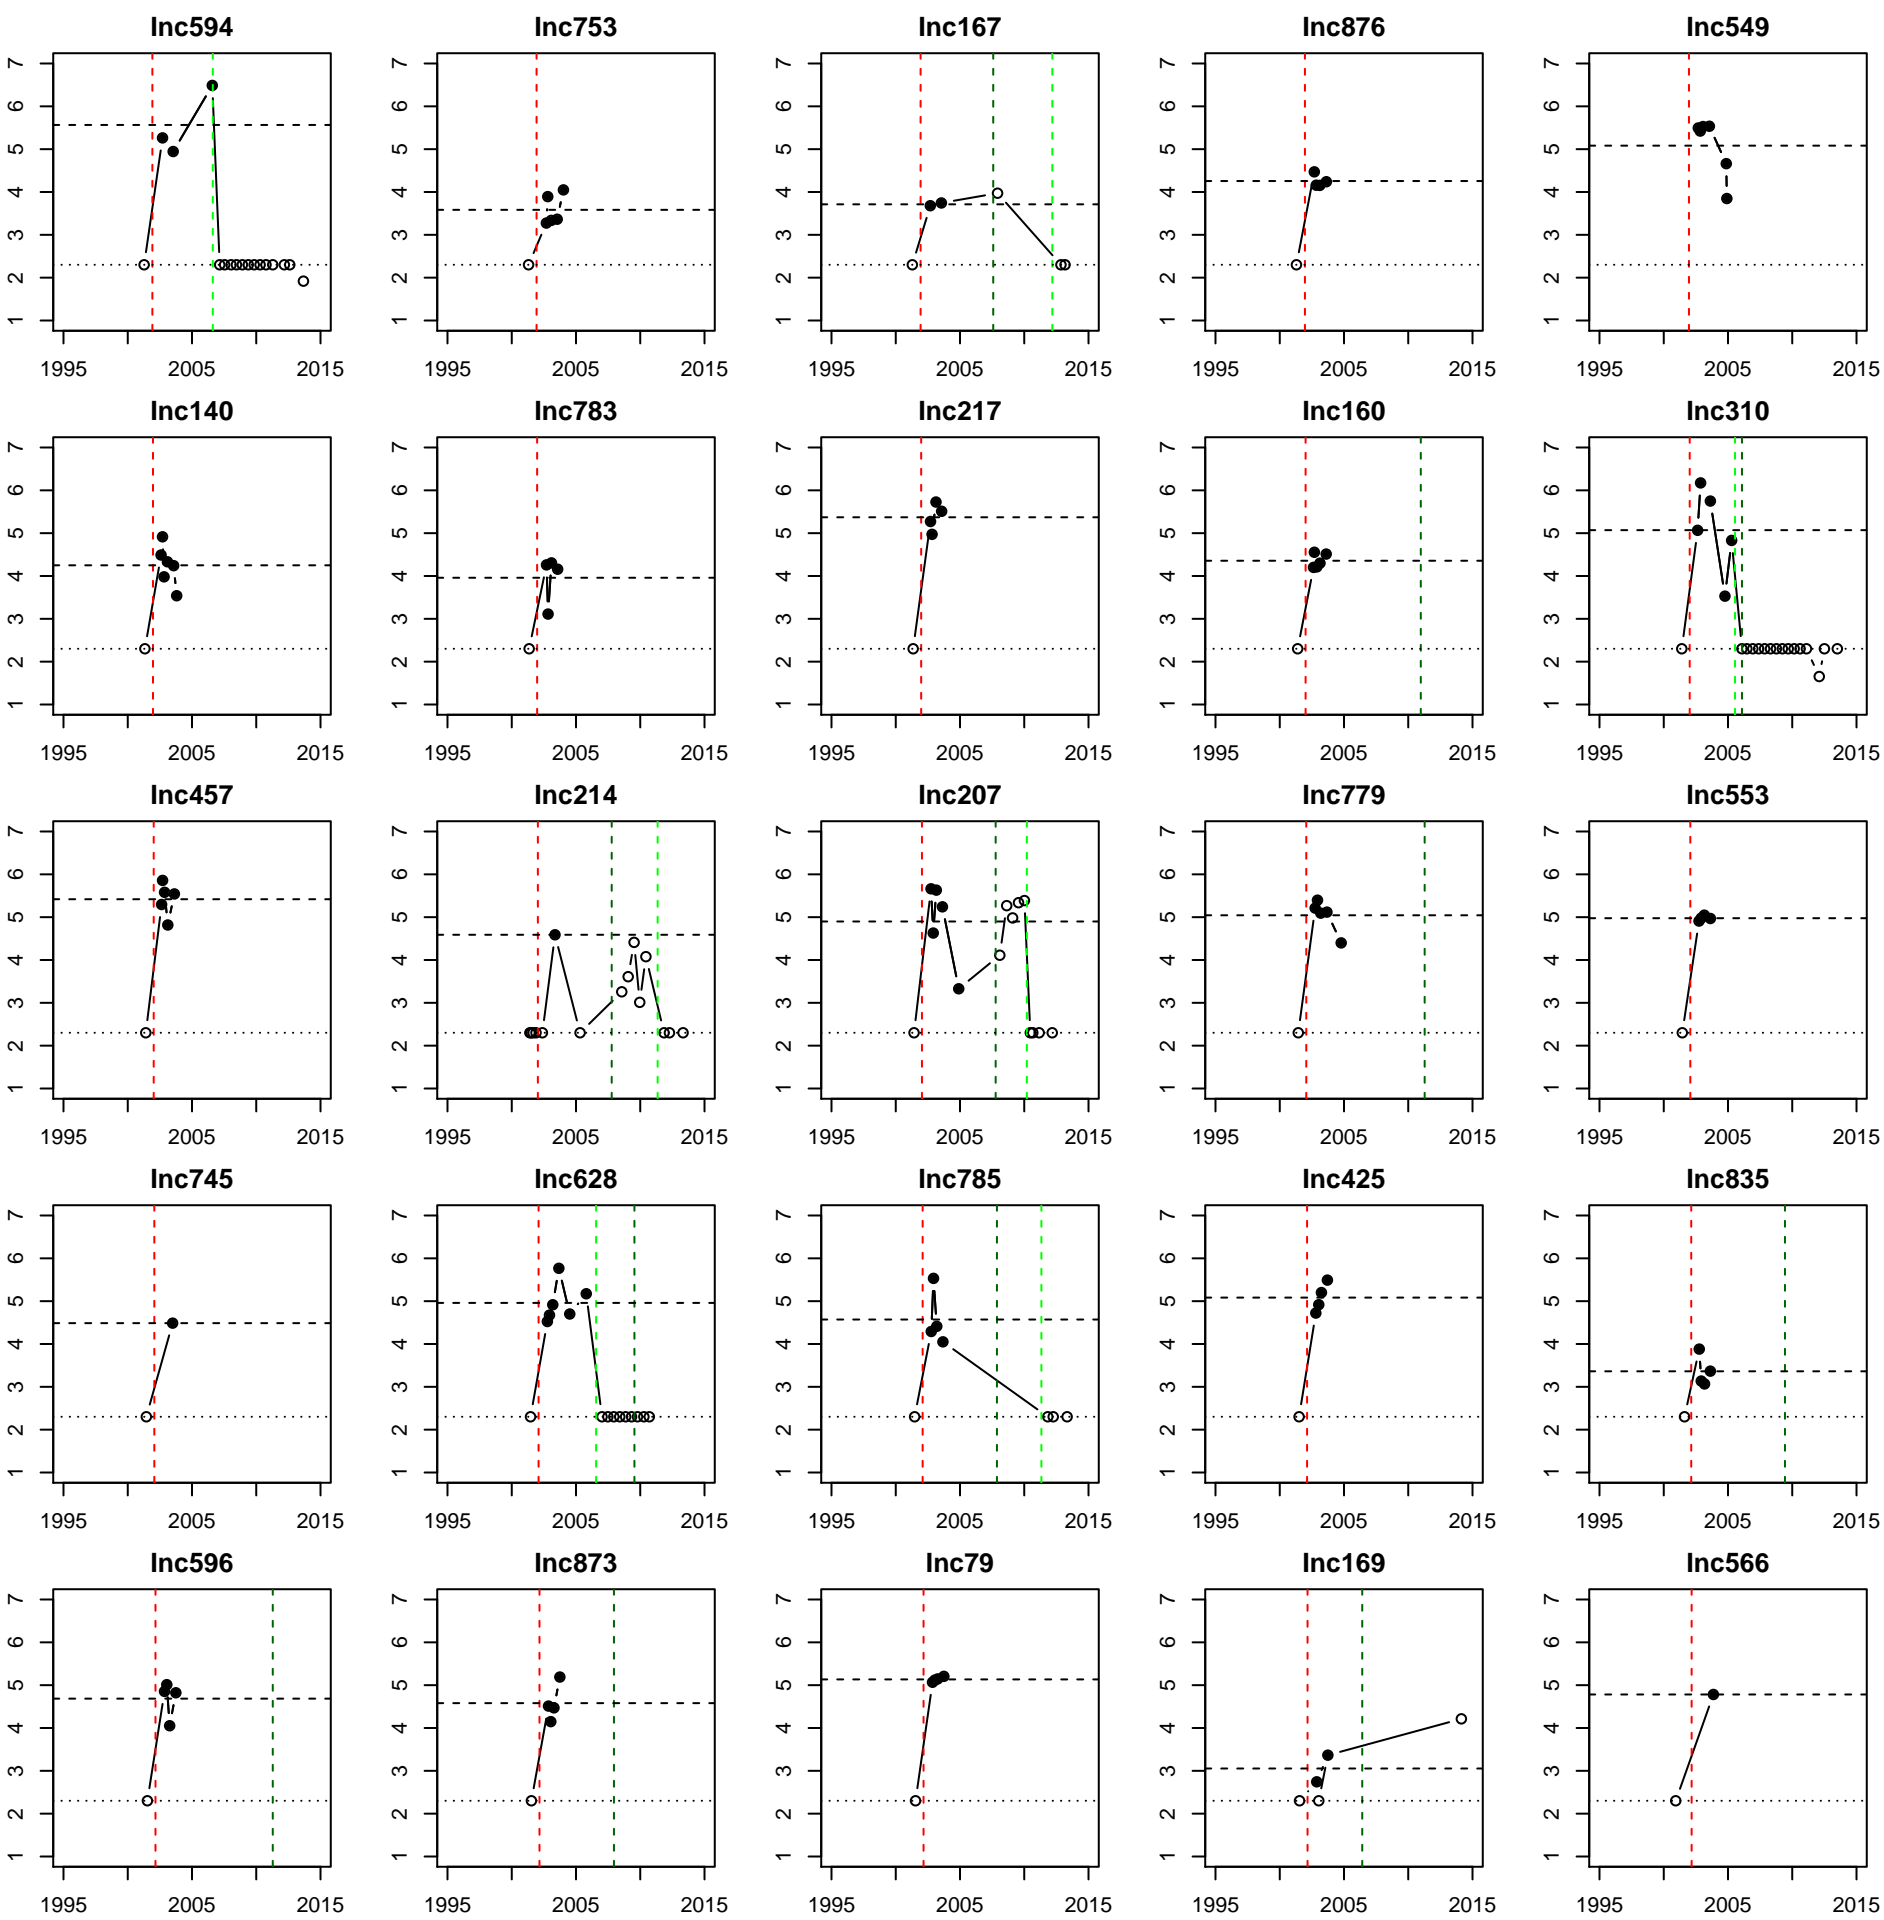

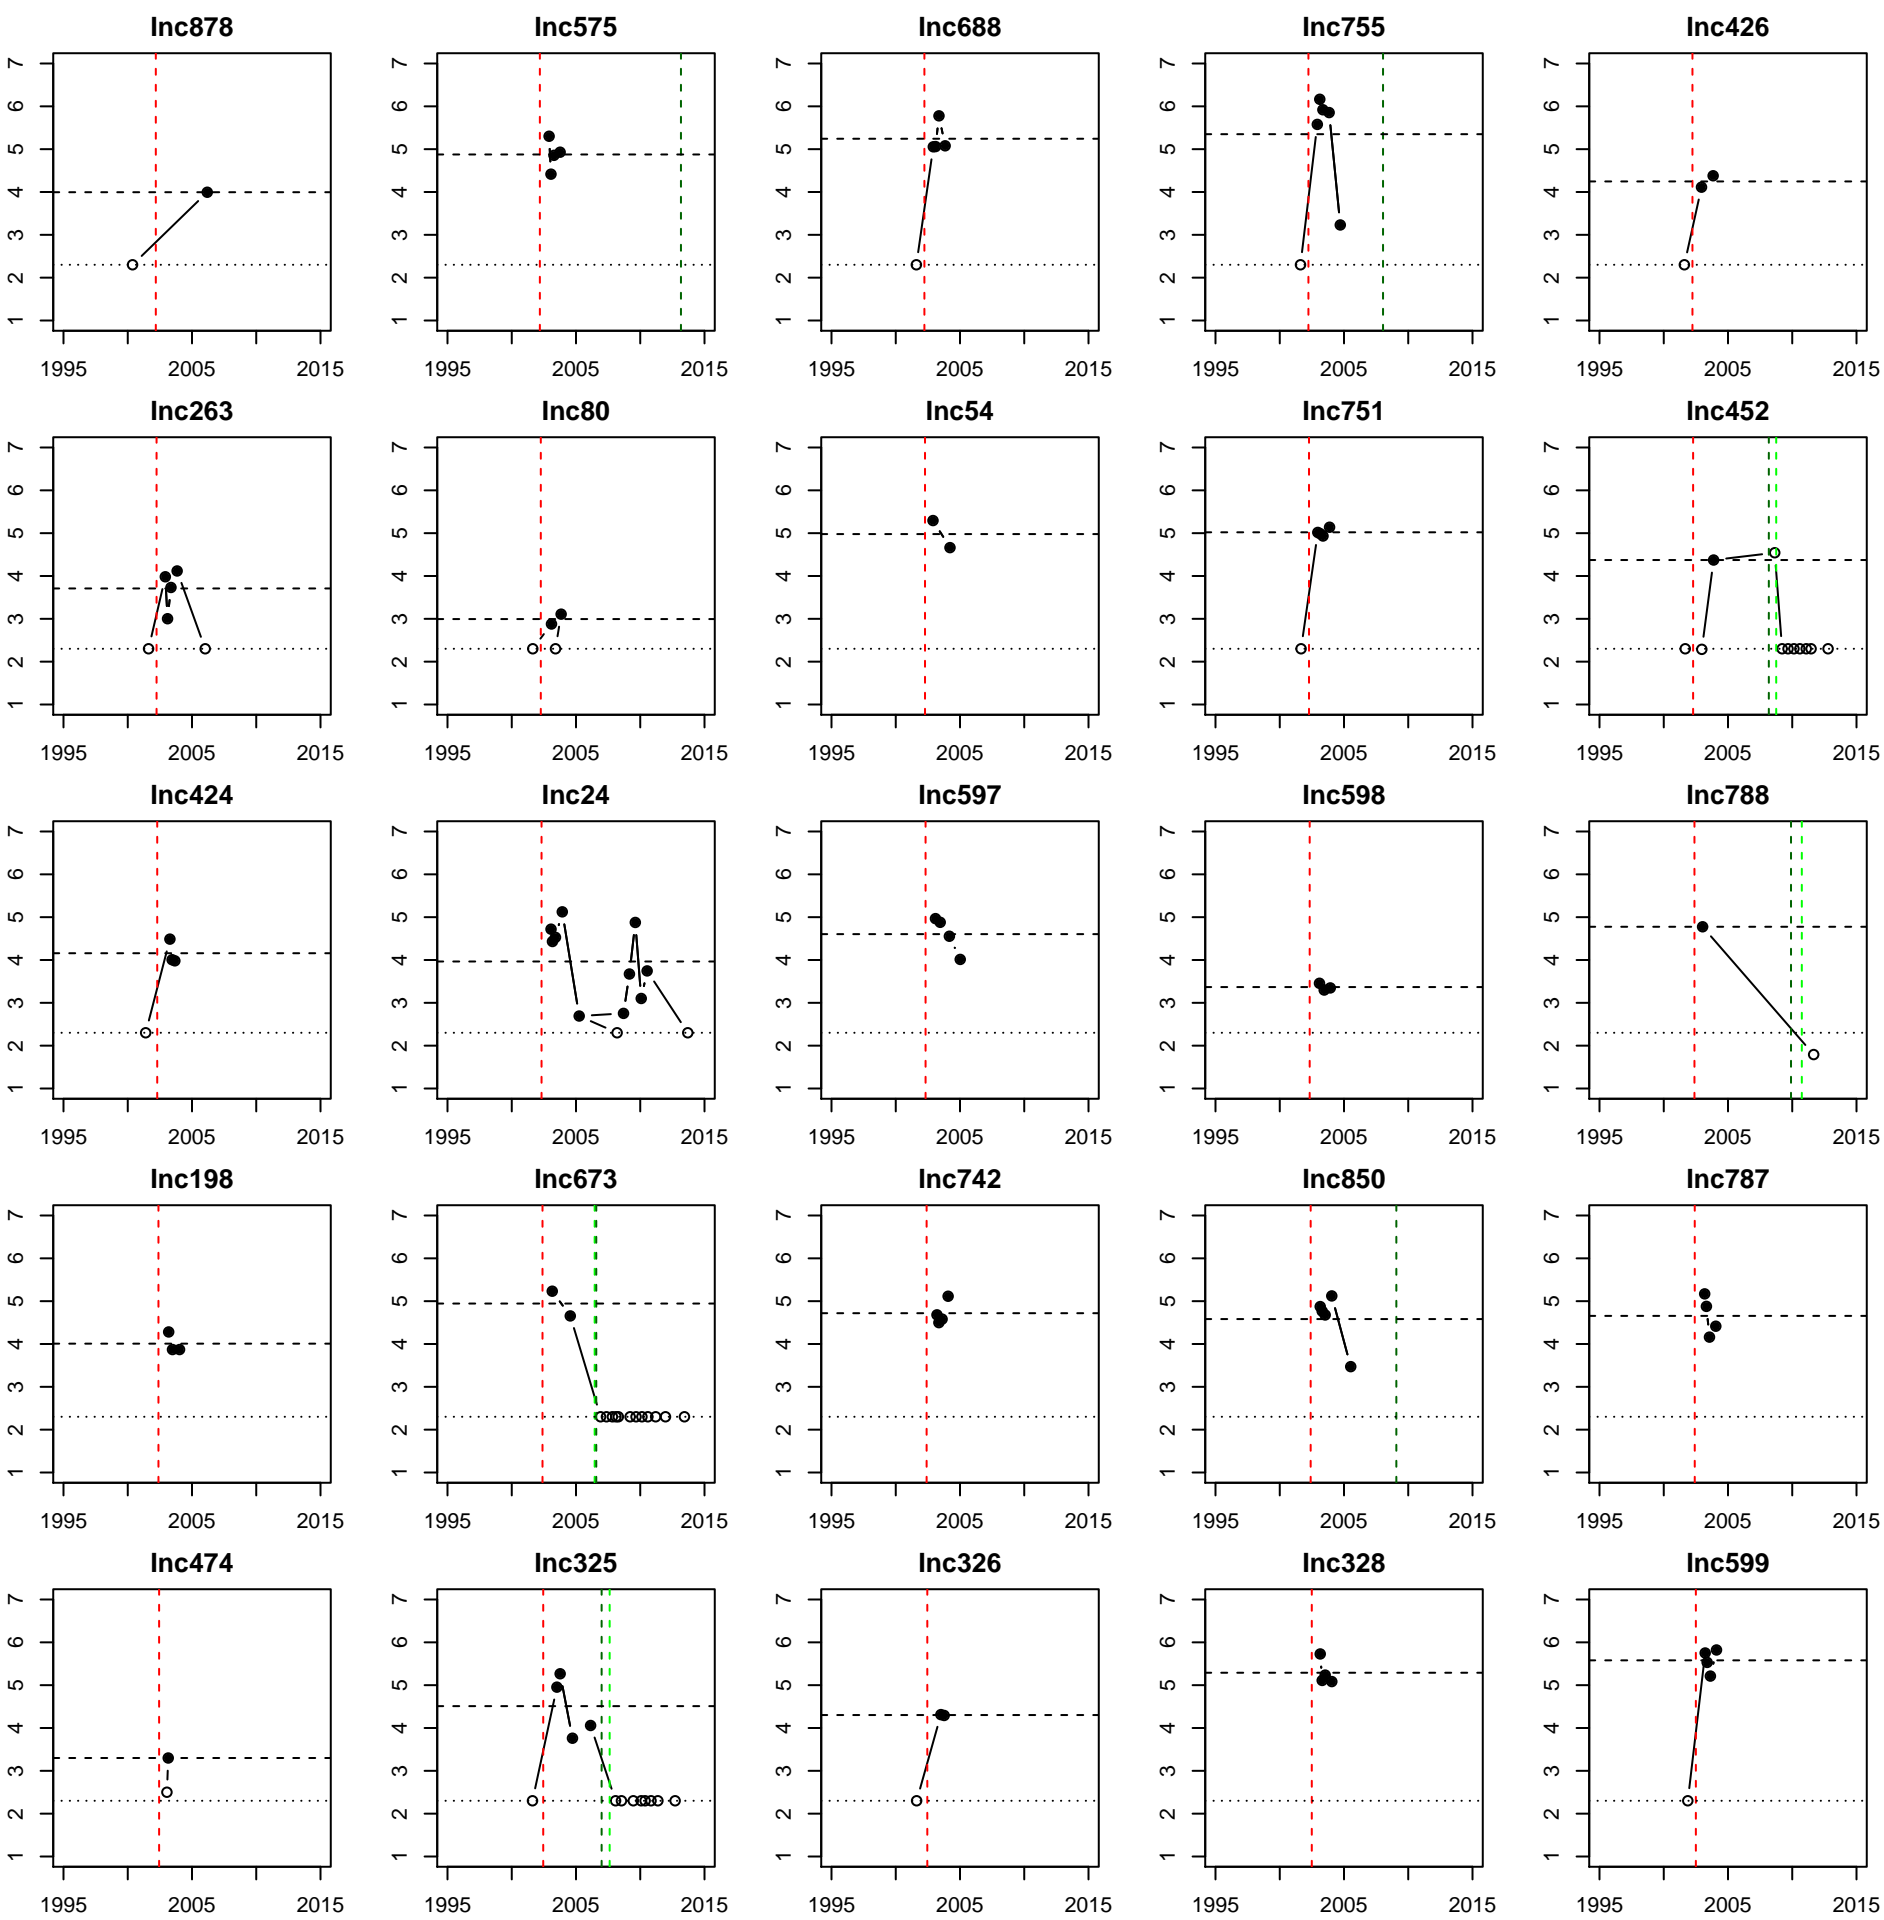

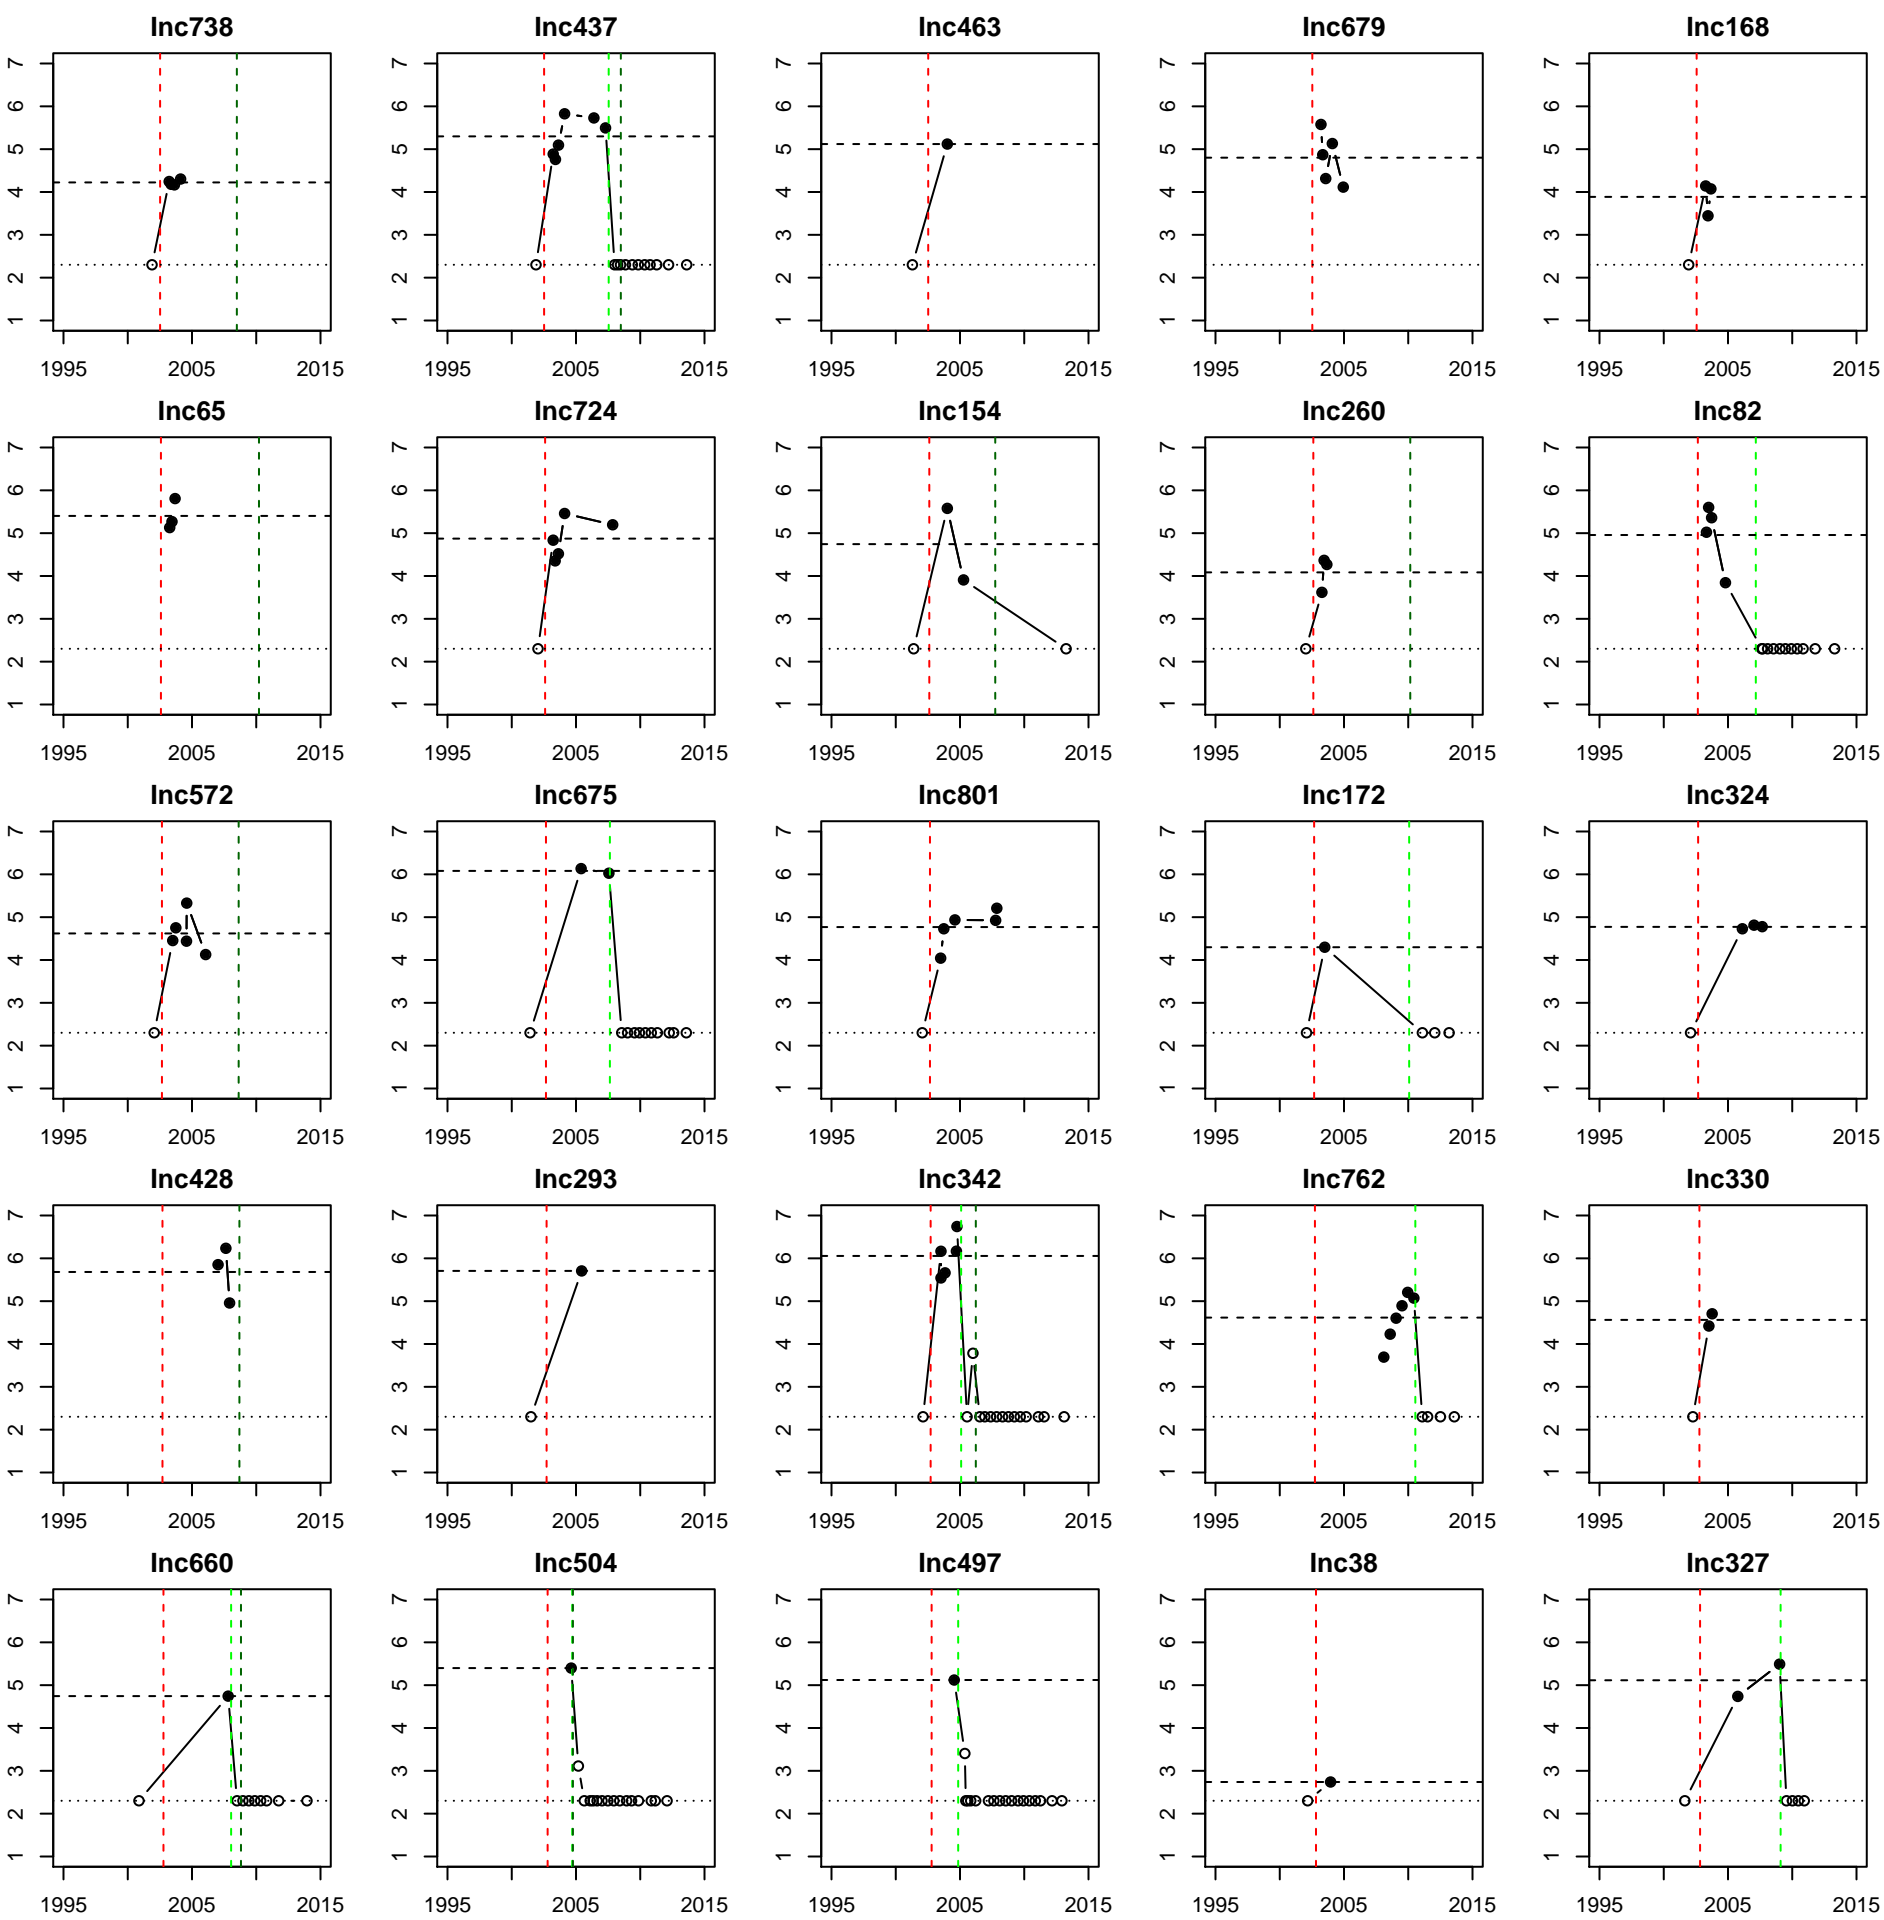

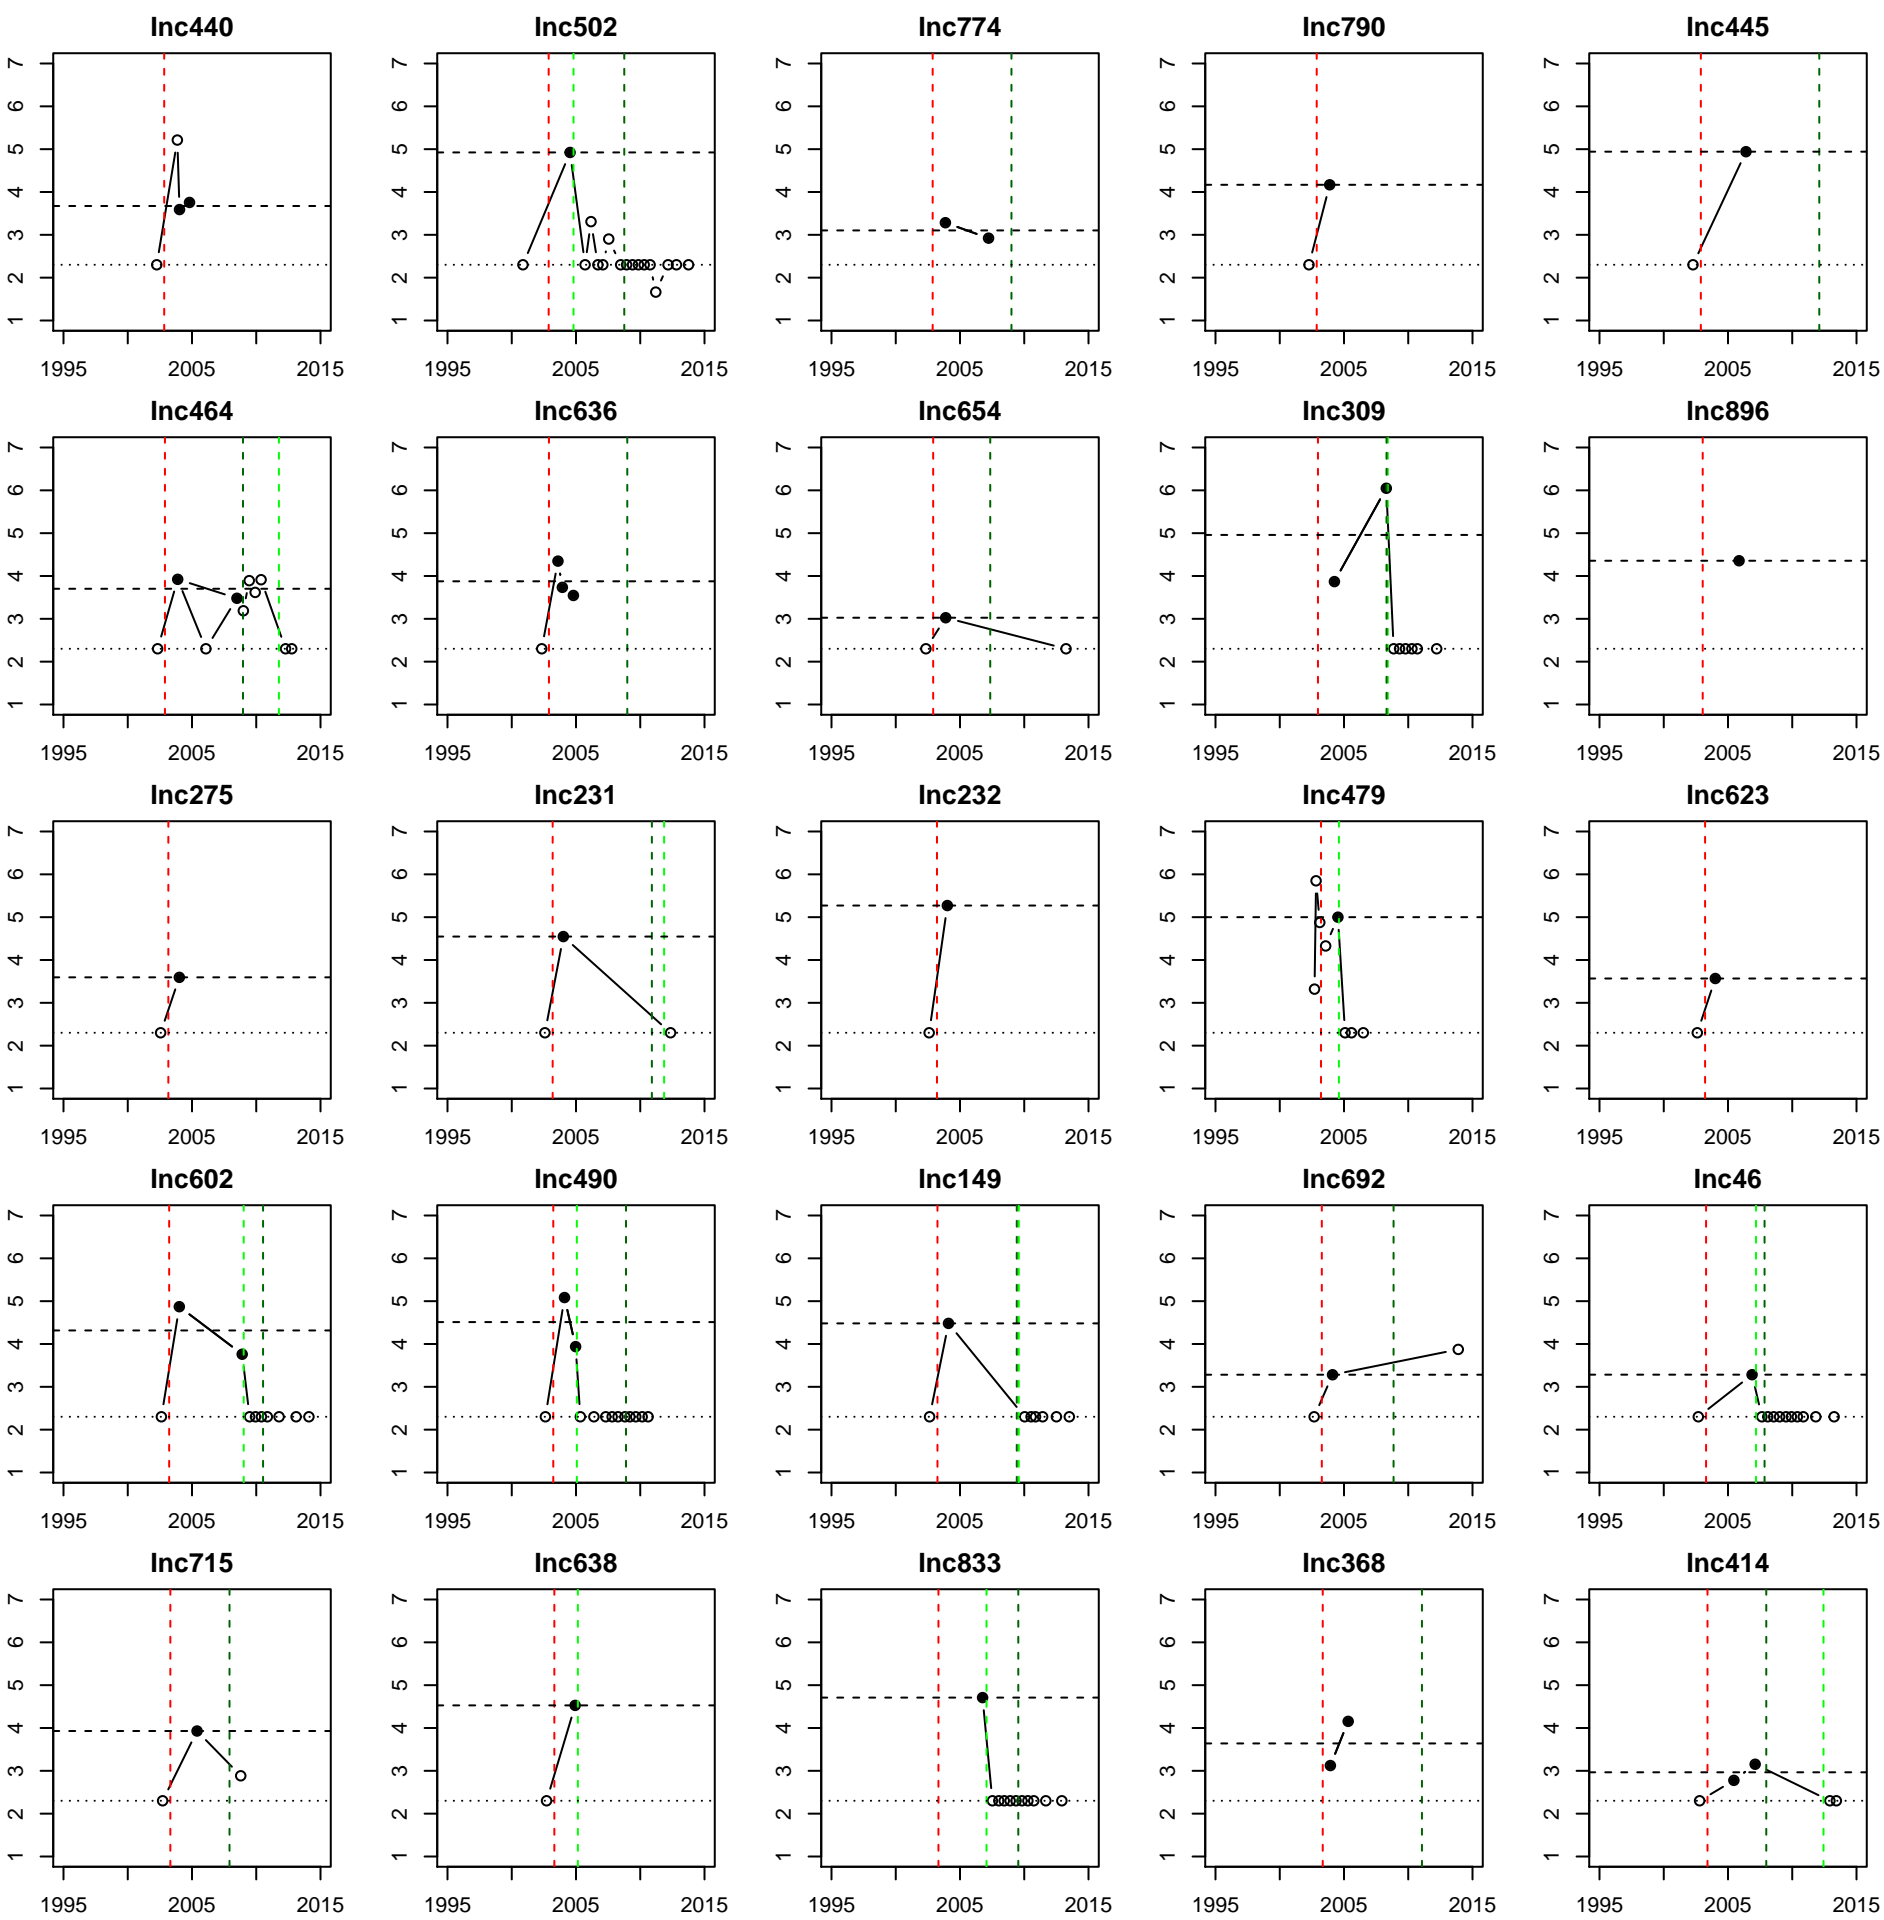

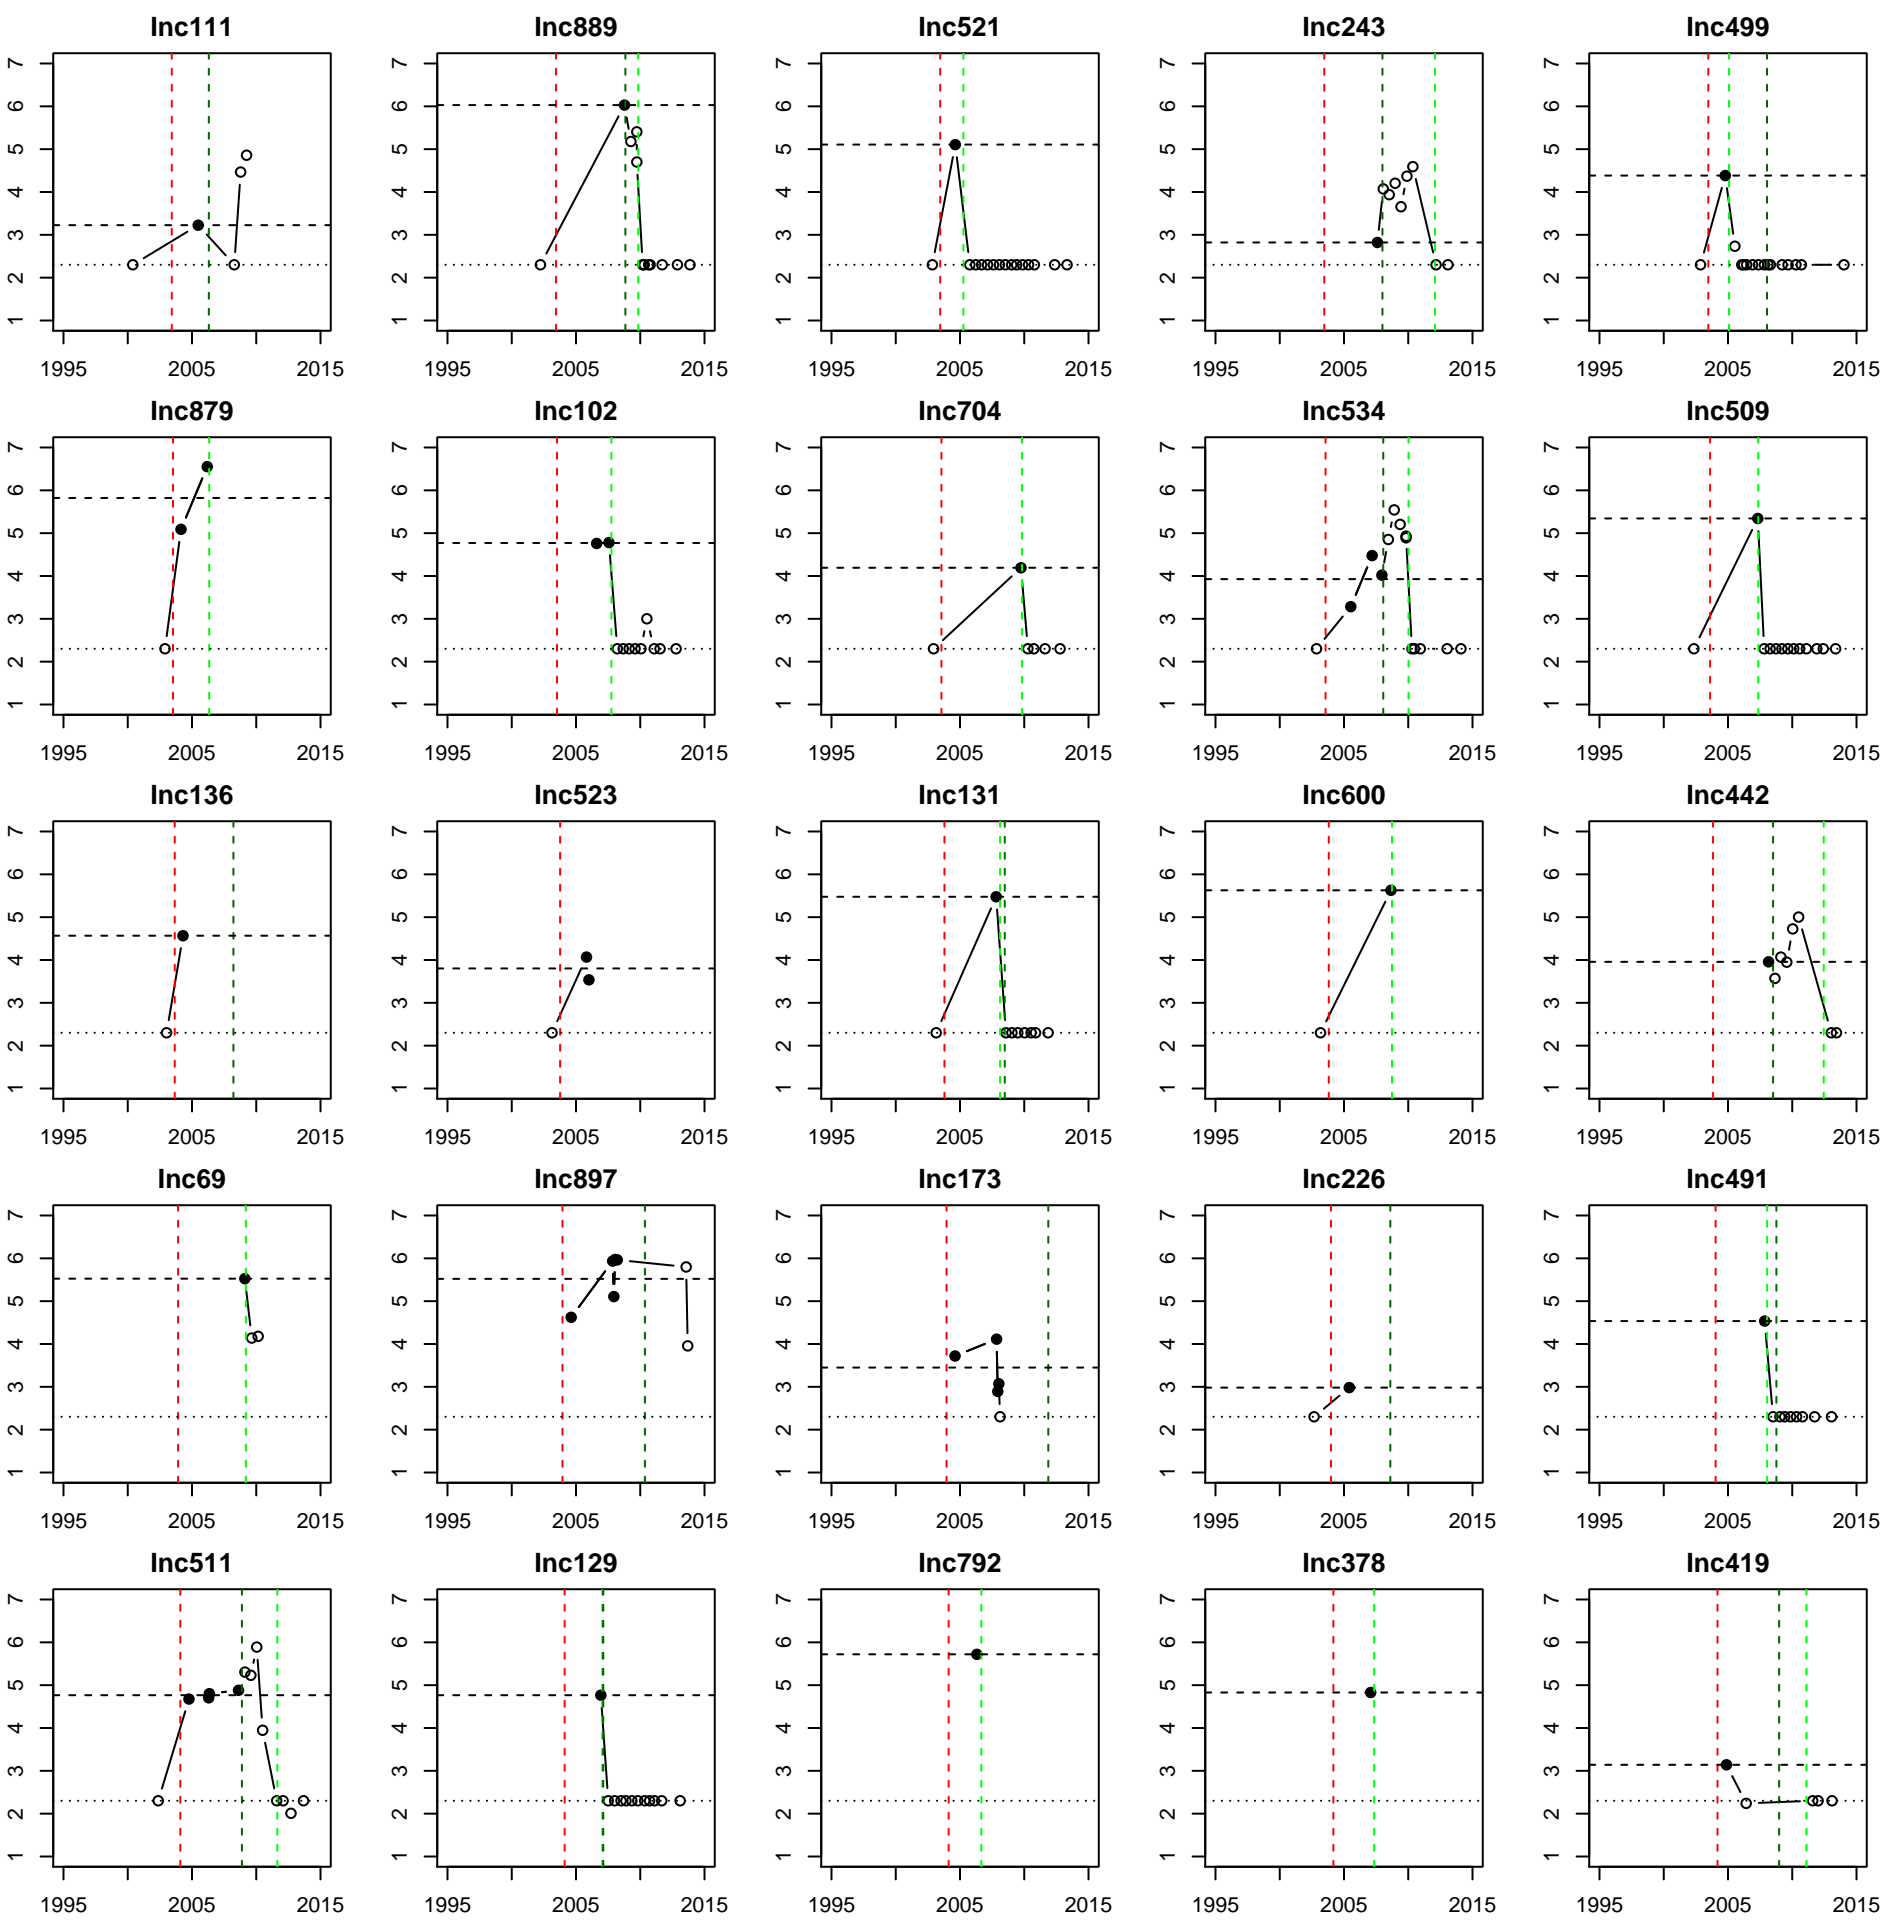

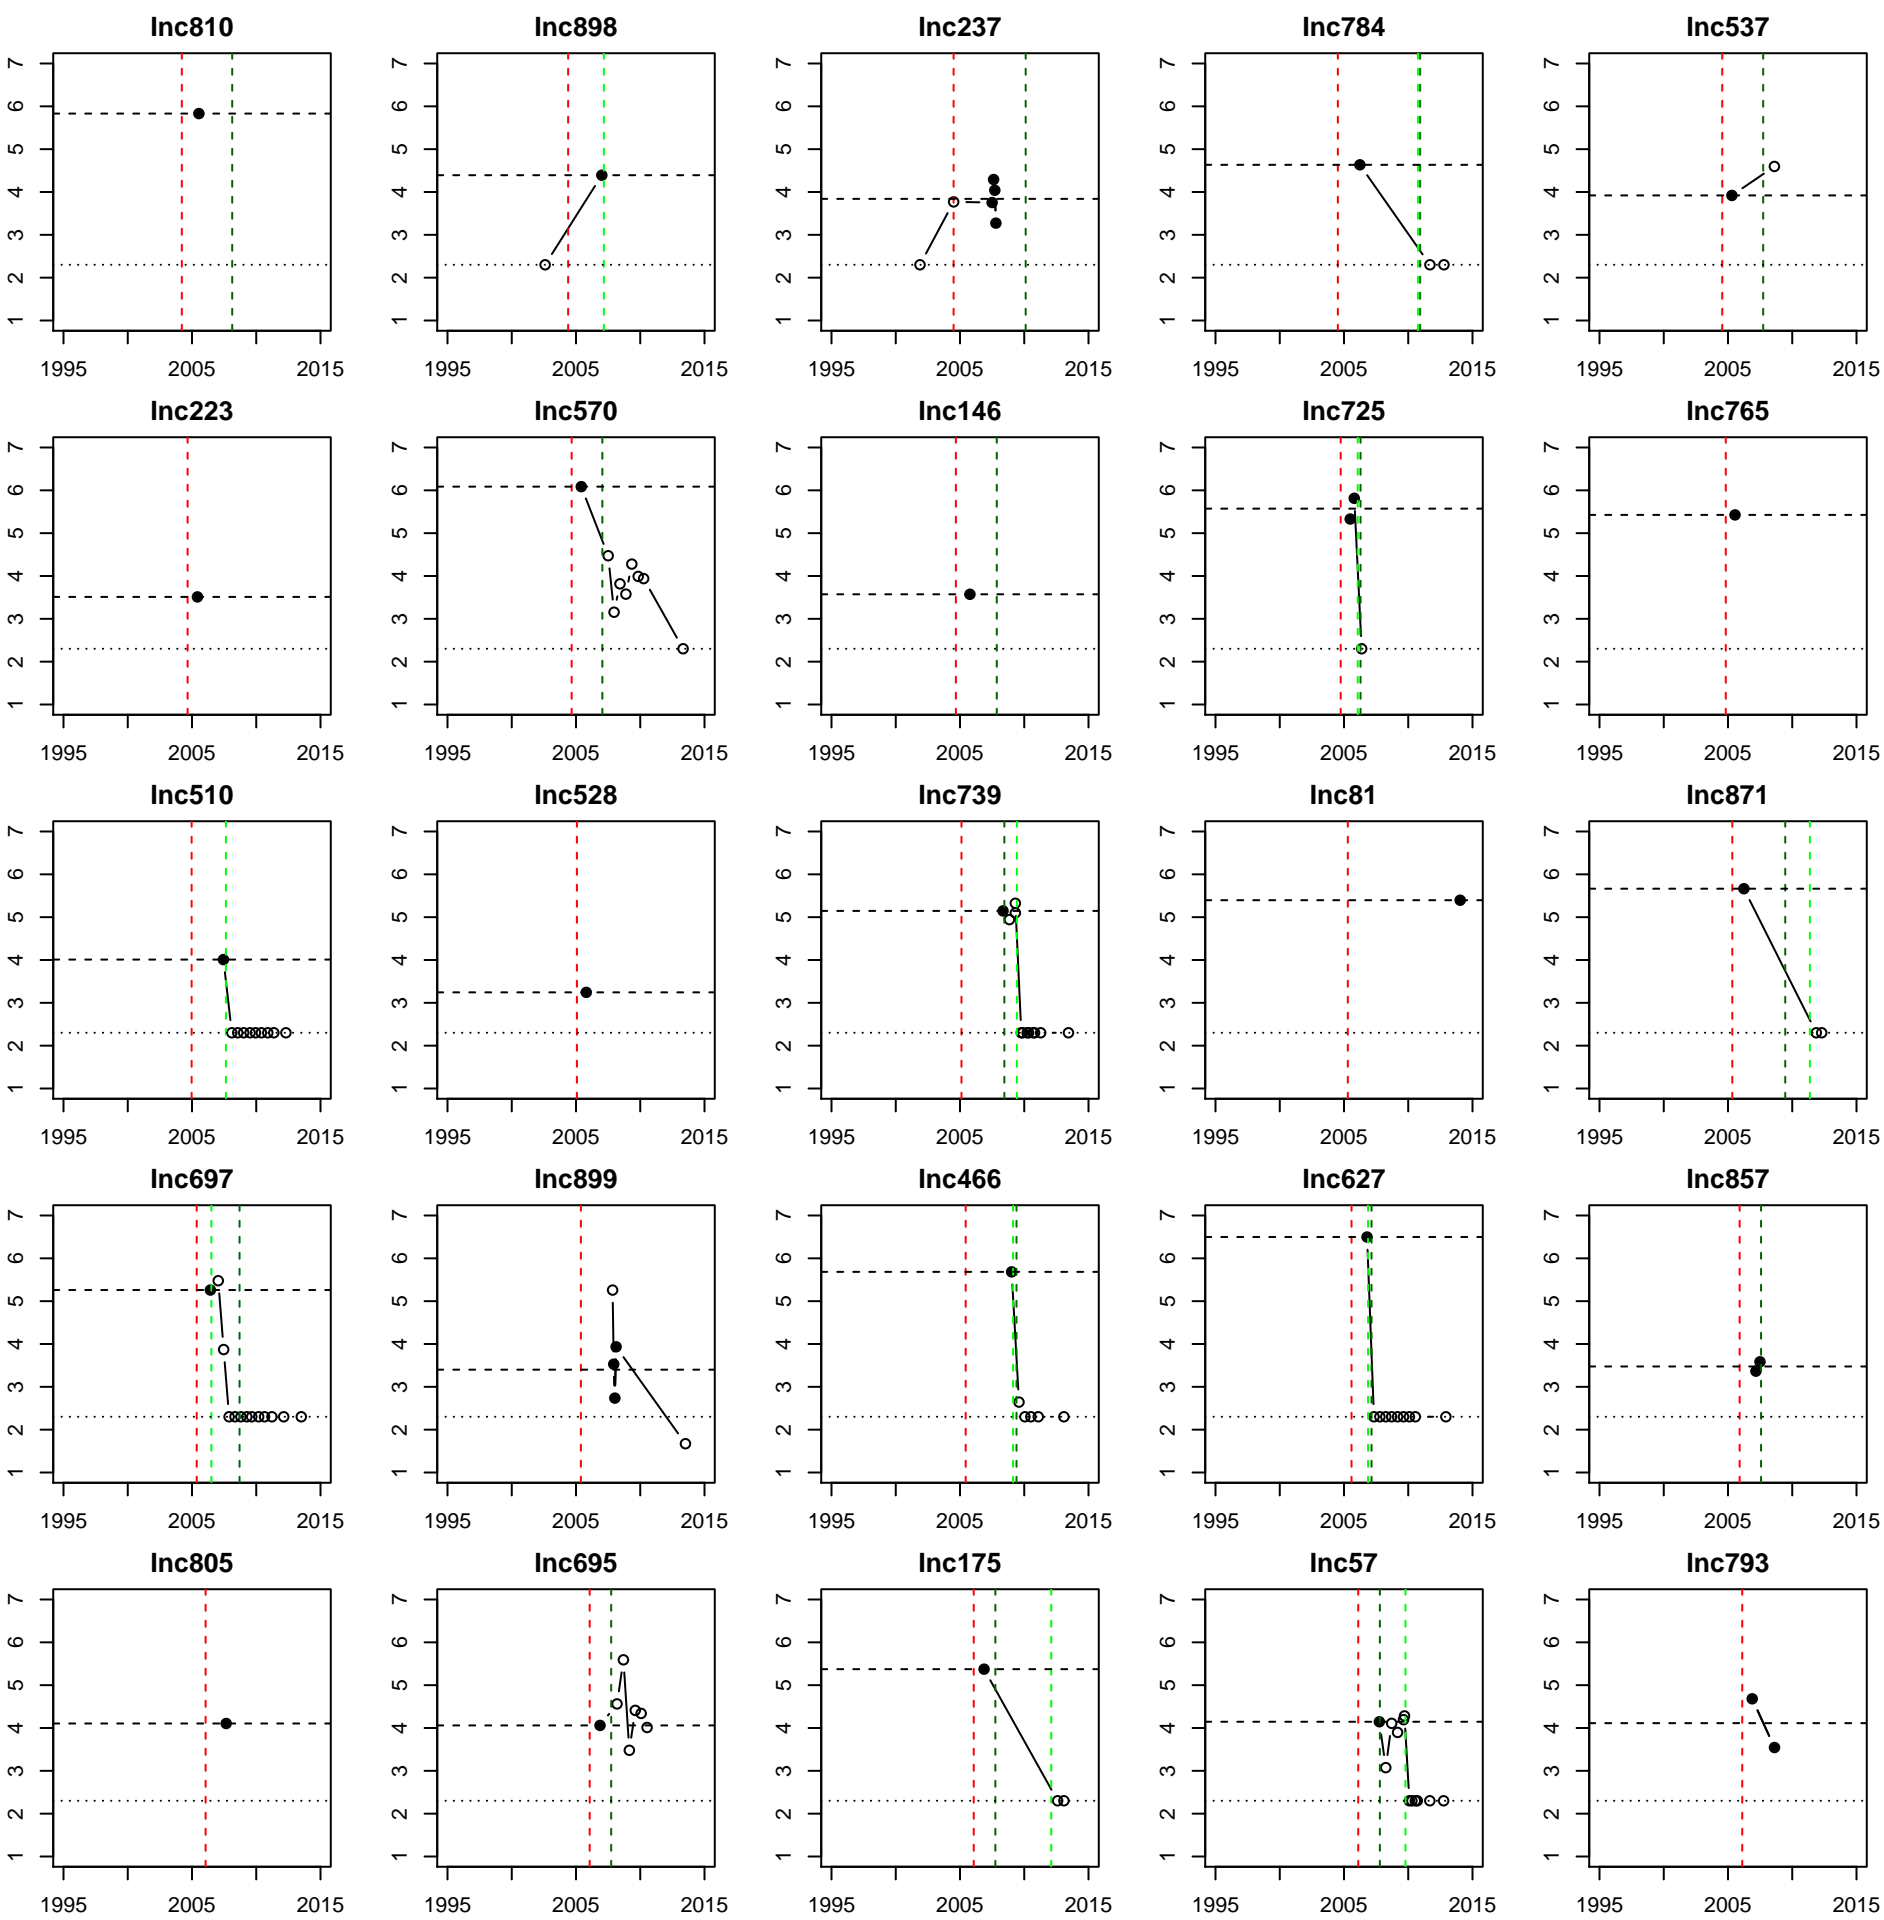

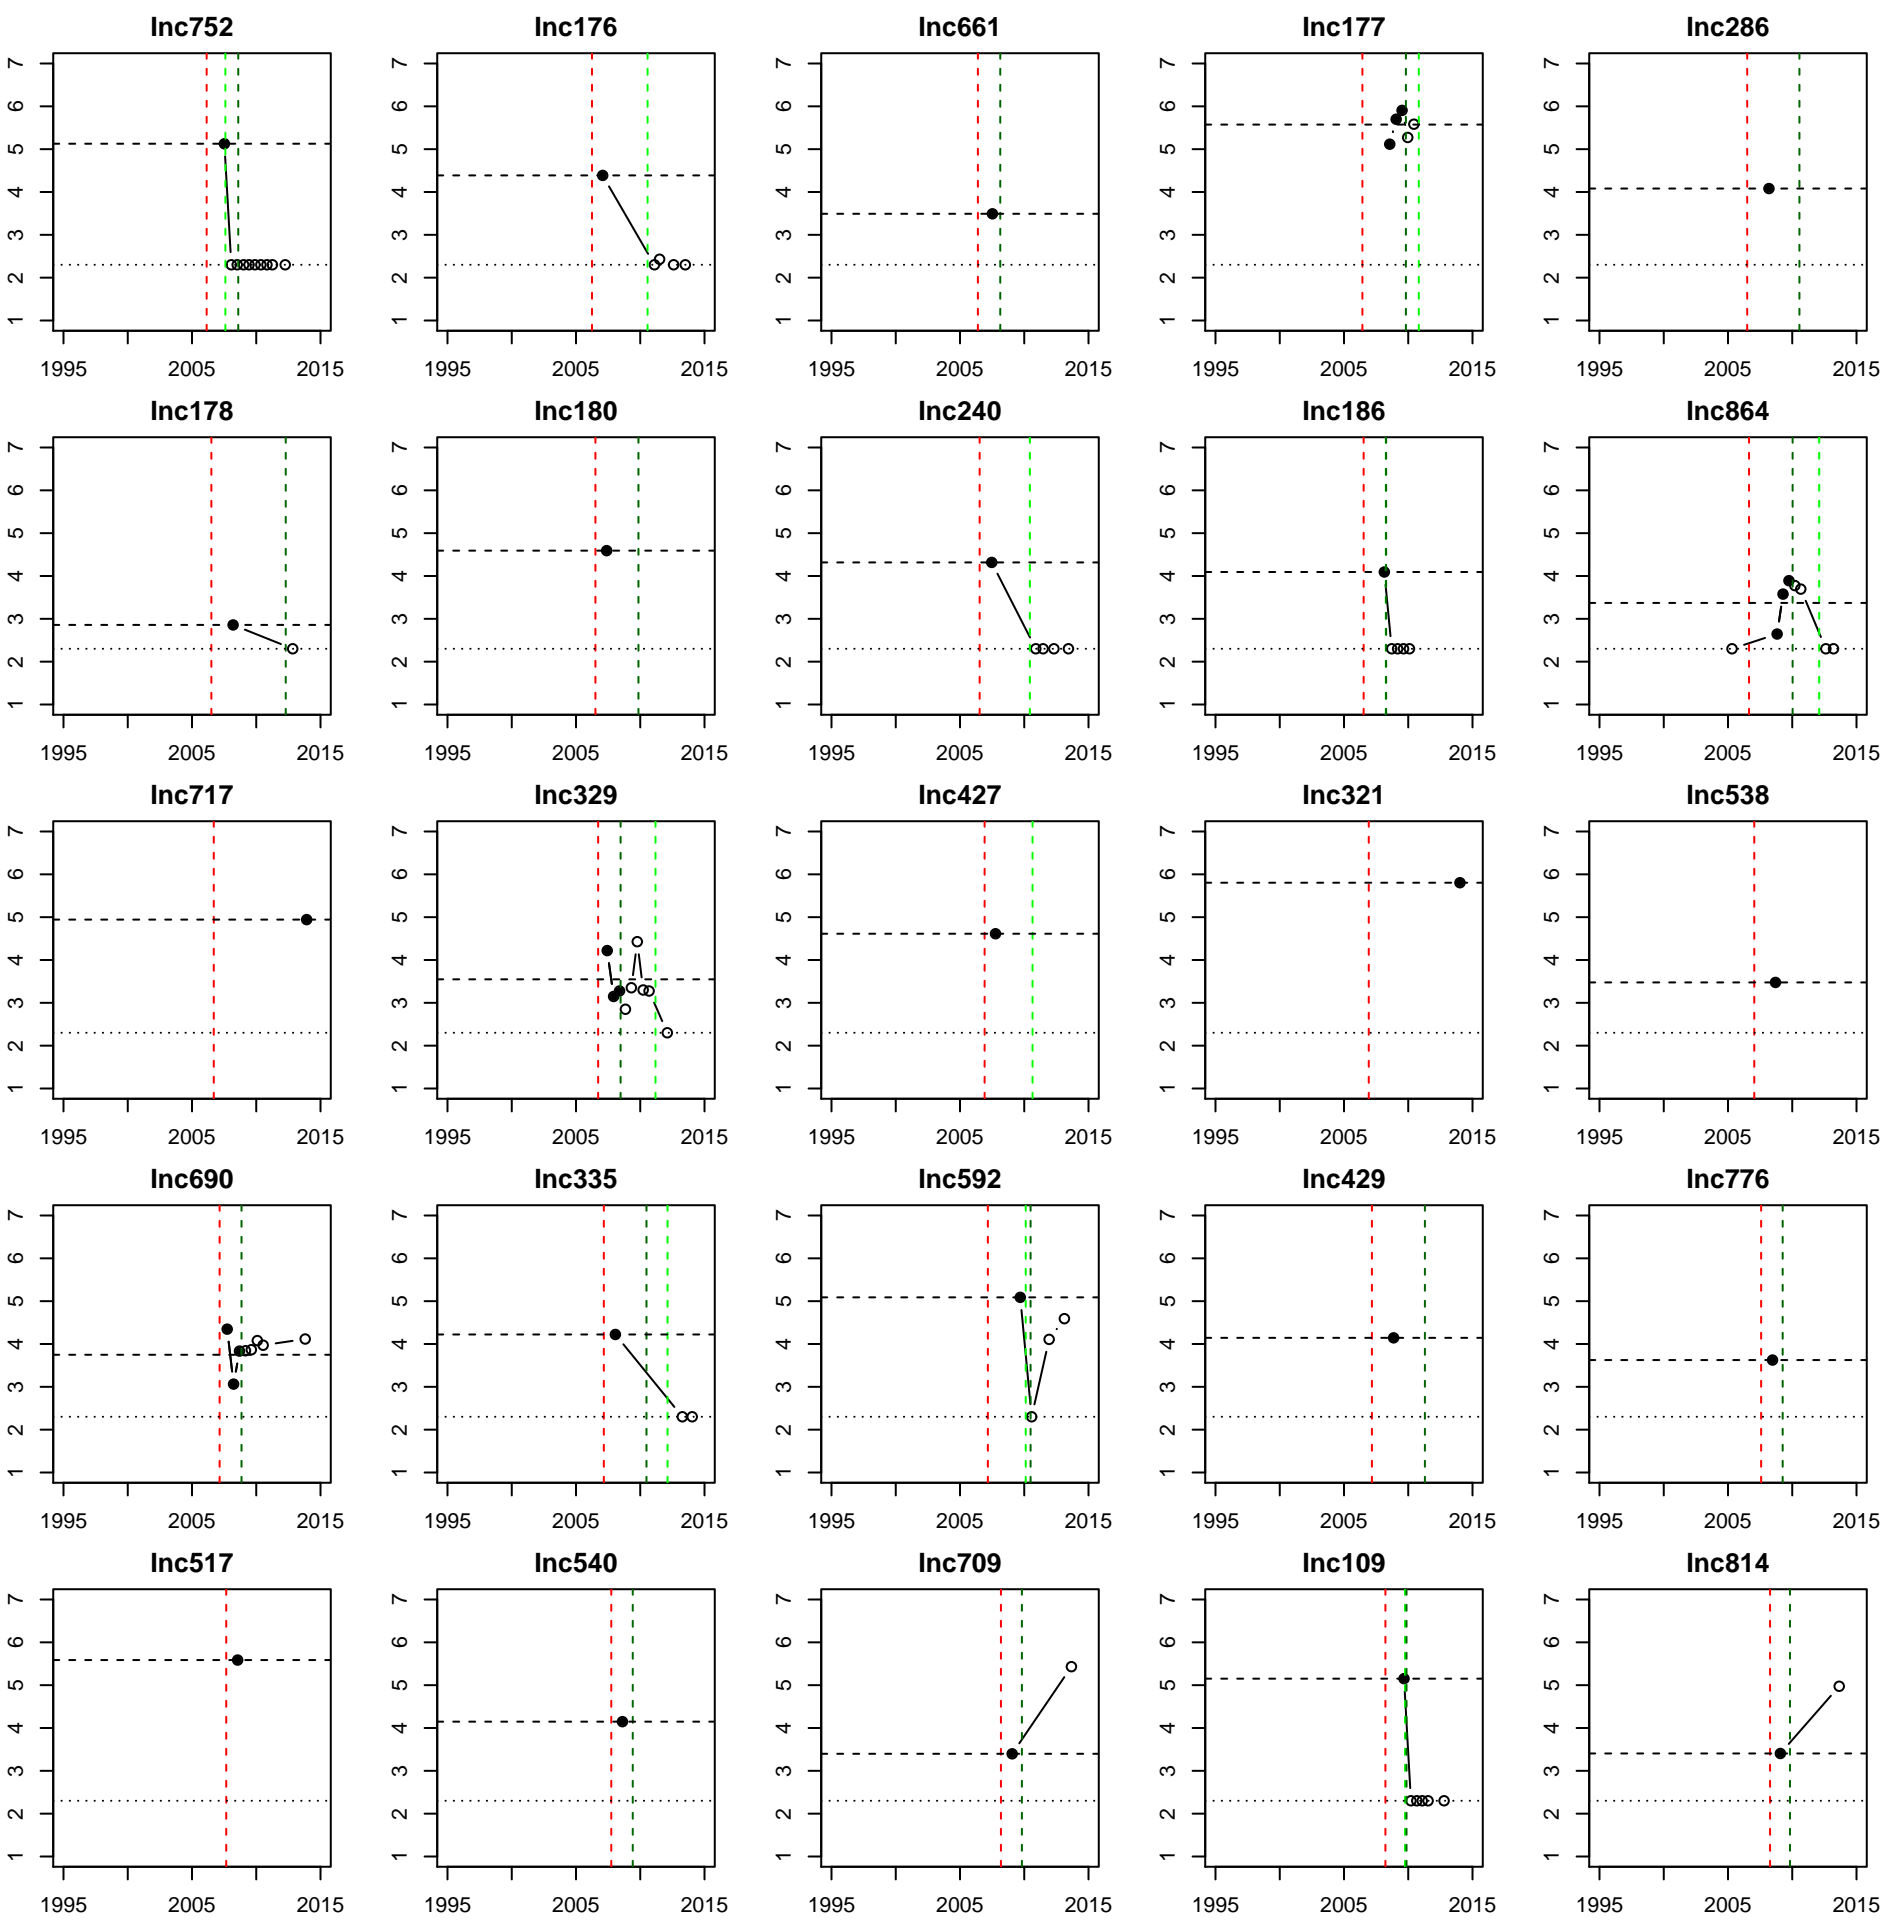

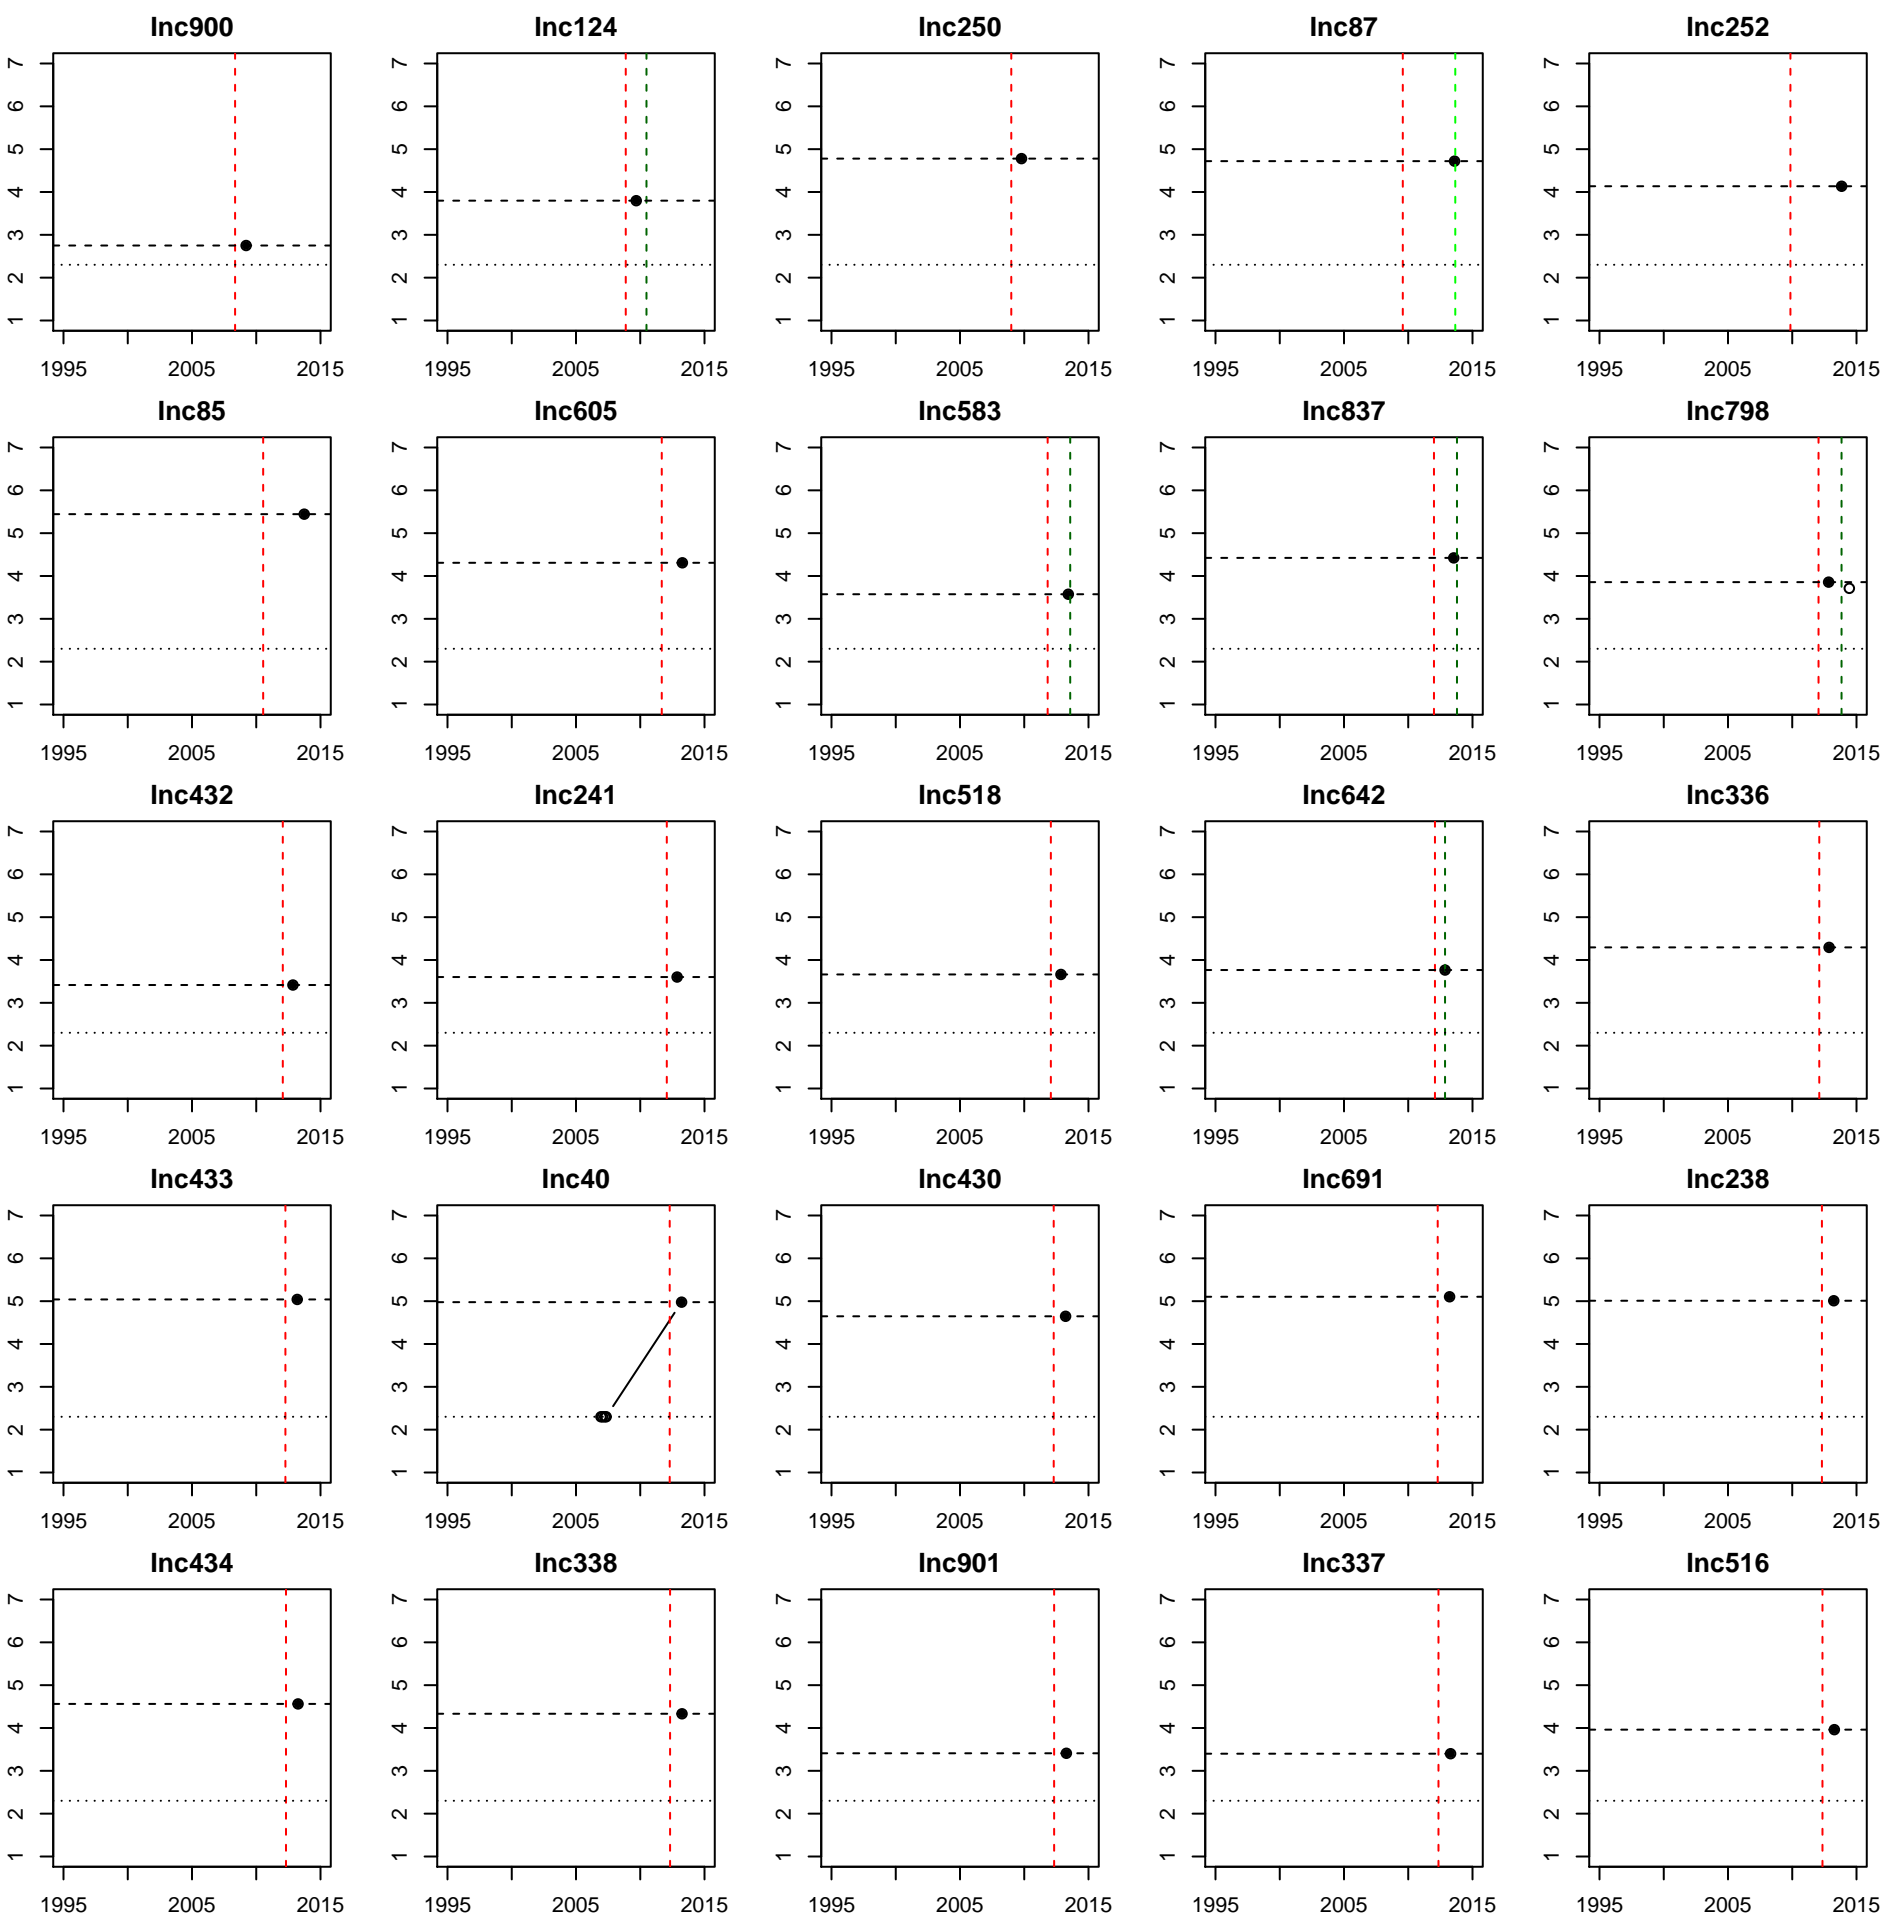

**Inc797**

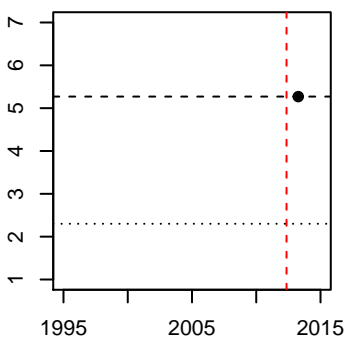

**Inc727**

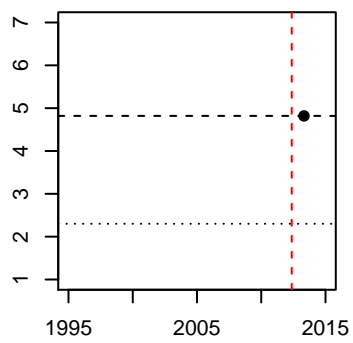

**Inc339**

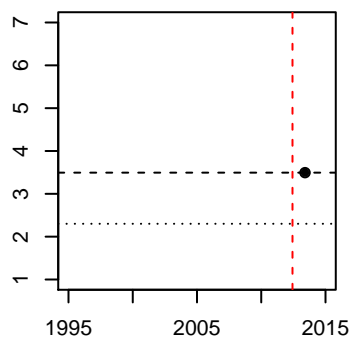

Supplement: supp [file elife-20492-supp-v1.zip › elife_poa_e20492_Supplementary_File_1.pdf]

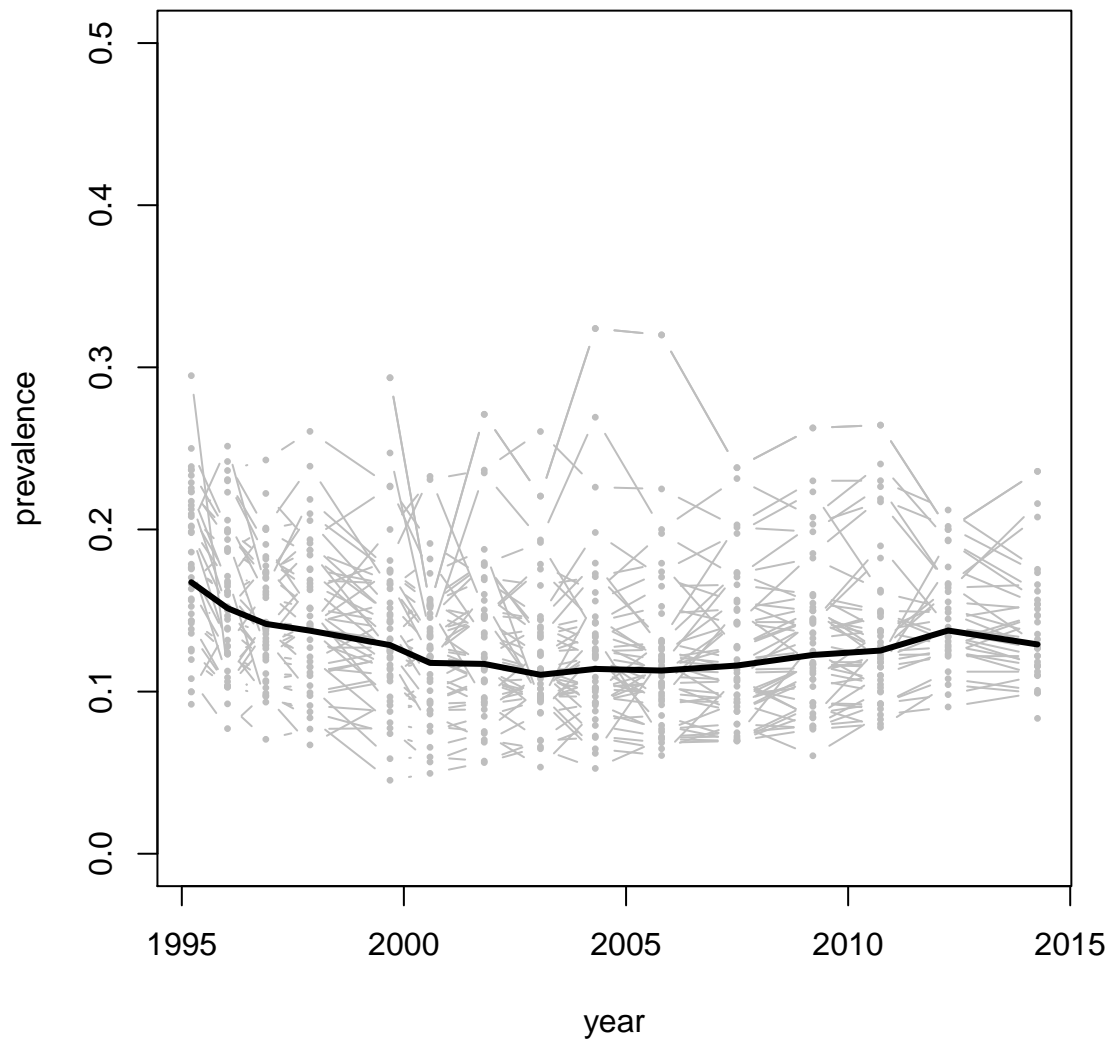

Supplement: supp [file elife-20492-supp-v1.zip › elife_poa_e20492_Figure_2_figure_supplement_1.pdf]
